# Supplementary material for: Guide to the Vascular Flora of the Savannas and Flatwoods of Shaken Creek Preserve and Vicinity (Pender & Onslow Counties, North Carolina, U.S.A.)
Source: Biodivers Data J. 2014 May 16;(2):e1099. doi: 10.3897/BDJ.2.e1099 (PMC4107865; doi:10.3897/BDJ.2.e1099)
Supplement: Supplementary material 1 — Climate diagram data [file biodiversity_data_journal-2-e1099-s001.xlsx]

## Sheet: Diagrams
Willard, NC
	Jan	Feb	Mar	Apr	May	Jun	Jul	Aug	Sep	Oct	Nov	Dec	Yearly Avg
F	45.8	48.7	55.7	63.1	70.6	77	80.8	79.5	74.7	64.5	56.3	48.5	63.8
C	7.66667	9.27778	13.1667	17.2778	21.4444	25	27.1111	26.3889	23.7222	18.0556	13.5	9.16667	17.6667
in	4.49	3.53	4.43	3.06	4.1	5.14	7.12	6.54	6.22	3.16	2.99	3.42	54.2
mm	114.046	89.662	112.522	77.724	104.14	130.556	180.848	166.116	157.988	80.264	75.946	86.868	1376.68
Jacksonville, NC
	Jan.	Feb	Mar	Apr	May	Jun	Jul	Aug	Sep	Oct	Nov	Dec	Yearly Avg
F	44.7	47.1	53.9	61.6	69.3	76.3	80.2	78.8	74.1	63.6	55.3	47.6	62.7
C	7.05556	8.38889	12.1667	16.4444	20.7222	24.6111	26.7778	26	23.3889	17.5556	12.9444	8.66667	17.0556
in	4.5	3.59	4.03	3.06	3.85	4.88	7.08	6.47	6.27	3.32	3.33	3.69	55
mm	114.3	91.186	102.362	77.724	97.79	123.952	179.832	164.338	159.258	84.328	84.582	93.726	1397
