# Supplementary material for: Guide to the Vascular Flora of the Savannas and Flatwoods of Shaken Creek Preserve and Vicinity (Pender & Onslow Counties, North Carolina, U.S.A.)
Source: Biodivers Data J. 2014 May 16;(2):e1099. doi: 10.3897/BDJ.2.e1099 (PMC4107865; doi:10.3897/BDJ.2.e1099)
Supplement: Supplementary material 2 — Pie chart data [file biodiversity_data_journal-2-e1099-s002.xlsx]

## Sheet: Explanation
Explanation of spreadsheets
SCP Taxa = taxa that were collected or reported from Shaken Creek Preserve in this study but were not collected or reported from other areas within a 2-mile radius (including all of Sandy Run State Natural Area)
SARU + V Taxa = taxa that were collected or reported from within a 2-mile radius (including all of Sandy Run State Natural Area) of but not from within Shaken Creek Preserve
SCP and SARU + V taxa = taxa collected or reported from both Shaken Creek Preserve and other areas within a 2-mile radius (including all of Sandy Run State Natural Area)

## Sheet: SCP taxa
Taxonomic Source	Taxon	Synonymy with Weakley 2012	Synonymy with Flora of North America (=FNA)	Synonymy with Radford, Ahles, and Bell (=RAB)	Family	Clade (F+FA = fern and fern allies; Gymn = Gymnosperms; Basal Angio = basal angiosperms; Mono = monocots; Dico = eudicots)	Abundance	Collected in Shaken Creek Preserve by the author (RWT = Robert Thornhill)	Collected in Shaken Creek Preserve by someone besides the author (RJL = Richard LeBlond; Sorrie =Bruce Sorrie). See herbarium research supplementary file for more information.	Reported from Shaken Creek Preserve but no vouchers have been seen by the author.	Collected in Sandy Run State Natural Area by John Taggart (JBT). See Taggart 2010.	Collected in Sandy Run State Natural Area by Wilbur, a collector with an extensive collection at DUKE. See herbarium research supplementary file for more information.	Collected in Sandy Run State Natural Area by someone besides JBT or Wil. See herbarium research supplementary file for more information.	Collected in Sandy Run State Natural Area by someone besides JBT or Wil. See herbarium research supplementary file for more information.	Report from Sandy Run State Natural Area. (Neck = LeBlond and Weakley 1991; JBT = reported by Taggart (2010), but basis of report is unknown).	Coll vicinity	FS (Federal Status)	SS (State Status)	SR (State Rank)	GR (Global Rank)	Exotic? (y = yes; blank = no)
Weakley (2012)	Eleocharis equisetoides (Elliott) Torr.	= Weakley	= FNA	= RAB	Cyperaceae	Mono	Rare	RWT	RJL									W1	S3	G4
Weakley (2012)	Dichanthelium caerulescens (Hack. ex Hitchc.) Correll	= Weakley	< D. dichotomum (L.) Gould ssp. roanokense (Ashe) Freckmann & Lelong sensu FNA	< Panicum dichotomum L. sensu RAB	Poaceae	Mono	Rare	RWT	RJL									E	S1S2	G2G3
Weakley (2012)	Muhlenbergia torreyana (Schult.) Hitchc.	= Weakley	= FNA		Poaceae	Mono	Rare	RWT	Sor, RJL									SC-V	S2	G3
Weakley (2012)	Juniperus virginiana L. var. virginiana	= Weakley	= FNA	= J. virginiana sensu RAB	Cuppressaceae	Gymn	Rare	RWT
Weakley (2012)	Pinus elliottii Engelm. var. elliottii	= Weakley	= FNA	< P. elliottii Engelm. sensu RAB	Pinaceae	Gymn	Infrequent	RWT													y
Weakley (2012)	Eleocharis baldwinii (Torr.) Chapm.	= Weakley	= FNA	= RAB	Cyperaceae	Mono	Infrequent	RWT
Weakley (2012)	Fuirena pumila (Torr.) Spreng.	= Weakley	= FNA	= RAB	Cyperaceae	Mono	Rare	RWT
Weakley (2012)	Isolepis carinata Hook. & Arn. ex Torr.	= Weakley	= FNA	= Scirpus koilolepis (Steud.) Gleason sensu RAB	Cyperaceae	Mono	Rare	RWT										SR-P	S1	G5
Weakley (2012)	Rhynchospora filifolia A. Gray	= Weakley	= FNA	= RAB	Cyperaceae	Mono	Frequent	RWT
Weakley (2012)	Rhynchospora microcarpa Baldwin ex A. Gray	= Weakley	= FNA	= RAB	Cyperaceae	Mono	Infrequent	RWT										SR-P	S2	G5
Weakley (2012)	Schoenoplectus pungens (Vahl) Palla var. pungens	= Weakley	= FNA	< Scirpus americanus (Pers.) sensu RAB	Cyperaceae	Mono	Infrequent	RWT
Weakley (2012)	Scleria baldwinii (Torr.) Steud.	= Weakley	= FNA	= RAB	Cyperaceae	Mono	Infrequent	RWT										SR-P	S2	G4
Weakley (2012)	Scleria ciliata Michx. var. ciliata	= Weakley	= FNA	< S. ciliata Michx. sensu RAB	Cyperaceae	Mono	Occasional	RWT
Weakley (2012)	Chamaelirium luteum (L.) A. Gray	= Weakley	= FNA	= RAB	Heloniadaceae	Mono	Rare	RWT										W5B	S5	G5
Weakley (2012)	Hypoxis sessilis L.	= Weakley	= FNA	= RAB	Hypoxidaceae	Mono	Occasional	RWT										SR-P	SH	G4
Weakley (2012)	Sisyrinchium angustifolium Mill.	= Weakley	= FNA	= RAB	Iridaceae	Mono	Occasional	RWT
Weakley (2012)	Juncus elliottii Chapm.	= Weakley	= FNA	= RAB	Juncaceae	Mono	Occasional	RWT
Weakley (2012)	Juncus scirpoides Lam. var. compositus R.M. Harper	= Weakley	< J. scirpoides Lam. sensu FNA	< J. scirpoides Lam. sensu RAB	Juncaceae	Mono	Infrequent	RWT
Weakley (2012)	Juncus trigonocarpus Steud.	= Weakley	= FNA	= RAB	Juncaceae	Mono	Infrequent	RWT
Weakley (2012)	Amianthium muscitoxicum (Walter) A. Gray	= Weakley	= FNA	= A. muscaetoxicum (Walter) A. Gray sensu RAB	Melanthiaceae	Mono	Rare	RWT
Weakley (2012)	Aletris lutea Small	= Weakley	= FNA		Nartheciaceae	Mono	Rare	RWT
Weakley (2012)	Spiranthes eatonii Ames ex P.M. Br.	= Weakley	= FNA		Orchidaceae	Mono	Infrequent	RWT										SR-L	S2	G2G4
Weakley (2012)	Spiranthes vernalis Engelm. & A. Gray	= Weakley	= FNA	= RAB	Orchidaceae	Dico	Infrequent	RWT
Weakley (2012)	Agrostis perennans (Walter) Tuck.	= Weakley	< A. perennans (Walter) Tuck. sensu FNA	< A. perennans (Walter) Tuck. sensu RAB	Poaceae	Mono	Infrequent	RWT
Weakley (2012)	Andropogon glomeratus (Walter) Britton, Sterns, & Poggenb. var. hirsutior (Hack.) C. Mohr	= Weakley	= FNA	< A. virginicus L. sensu RAB	Poaceae	Mono	Occasional	RWT
Weakley (2012)	Andropogon virginicus L. var. decipiens C.S. Campb.	= Weakley	= FNA	< A. virginicus L. sensu RAB	Poaceae	Mono	Occasional	RWT										W7	S1S2	G5T4
Weakley (2012)	Coleataenia anceps (Michx.) Soreng ssp. rhizomata (Hitchc. & Chase) Soreng	= Weakley	= Panicum anceps Michx. ssp. rhizomatum (Hitchc. & Chase) Freckmann & Lelong sensu FNA	= Panicum anceps Michx. var. rhizomatum (Hitchc. & Chase) Fernald sensu RAB	Poaceae	Mono	Occasional	RWT
Weakley (2012)	Coleataenia longifolia (Torr.) Soreng ssp. combsii (Scribn. & C.R. Ball) Soreng	= Weakley	= Panicum rigidulum Bosc ex Nees subsp. combsii (Scribn. & C.R. Ball) Freckmann & Lelong sensu FNA	= Panicum longifolium Torr. var. combsii (Scribn. & C.R. Ball) Fernald sensu RAB	Poaceae	Mono	Occasional	RWT
Weakley (2012)	Dichanthelium chamaelonche (Trin.) Freckmann & Lelong ssp. chamaelonche	= Weakley	< D. chamaelonche (Trin.) Freckmann & Lelong ssp. chamaelonche sensu FNA	< Panicum chamaelonche Trin. sensu RAB	Poaceae	Mono	Infrequent	RWT
Weakley (2012)	Dichanthelium commutatum (Schult.) Gould var. commutatum	= Weakley	> D. commutatum (Schult.) Gould ssp. commutatum, D. commutatum (Schult.) Gould ssp. equilaterale (Scribn.) Freckmann & Lelong sensu FNA	< Panicum commutatum Schult. sensu RAB	Poaceae	Mono	Rare	RWT
Weakley (2012)	Dichanthelium consanguineum (Kunth) Gould & C.A. Clark	= Weakley	= FNA	Panicum consanguineum Kunth sensu RAB	Poaceae	Mono	Occasional	RWT
Weakley (2012)	Dichanthelium dichotomum (L.) Gould var. nitidum (Lam.) LeBlond	= Weakley	= D. dichotomum (L.) Gould ssp. nitidum (Lam.) Freckmann & Lelong sensu FNA	< Panicum dichotomum L. sensu RAB	Poaceae	Mono	Infrequent	RWT
Weakley (2012)	Dichanthelium leucothrix (Nash) Freckmann	= Weakley	= D. acuminatum (Sw.) Gould & C.A. Clark ssp. leucothrix (Nash) Freckmann & Lelong sensu FNA	= Panicum leucothrix Nash sensu RAB	Poaceae	Mono	Frequent	RWT
Weakley (2012)	Dichanthelium strigosum (Muhl. ex Elliott) Freckmann var. strigosum	= Weakley	= D. strigosum (Muhl. ex Elliott) Freckmann ssp. strigosum sensu FNA	< Panicum strigosum Muhl. ex Elliott sensu RAB	Poaceae	Mono	Infrequent	RWT
Weakley (2012)	Dichanthelium tenue (Muhl.) Freckmann & Lelong	= Weakley	= FNA	= Panicum tenue Muhl. sensu RAB	Poaceae	Mono	Occasional	RWT
Weakley (2012)	Dichanthelium villosissimum (Nash) Freckmann var. villosissimum	= Weakley	= D. ovale (Elliott) Gould & C.A. Clark subsp. villosissimum (Nash) Freckmann & Lelong sensu FNA	= Panicum villosissimum Nash sensu RAB	Poaceae	Mono	Infrequent	RWT
Weakley (2012)	Dichanthelium webberianum (Nash) LeBlond	= Weakley	< D. portoricense (Desv. ex Ham.) B.F. Hansen & Wunderlin spp. patulum (Scribn. & Merr.) Freckmann & Lelong sensu FNA	= Panicum webberianum Nash sensu RAB	Poaceae	Mono	Occasional	RWT
Weakley (2012)	Dichanthelium wrightianum (Scribn.) Freckmann	= Weakley	= FNA	= Panicum wrightianum Scribn. sensu RAB	Poaceae	Mono	Infrequent	RWT
Weakley (2012)	Muhlenbergia capillaris (Lam.) Trin.	= Weakley	= FNA	< RAB	Poaceae	Mono	Rare	RWT
Weakley (2012)	Panicum dichotomiflorum Michx. var. puritanorum Svenson	= Weakley	= P. dichotomiflorum Michx. subsp. puritanorum (Svenson) Freckmann & Lelong sensu FNA		Poaceae	Mono	Rare	RWT										SR-P	S1	G5T4
Weakley (2012)	Paspalum praecox Walter var. curtisianum (Steud.) Vasey	= Weakley	< P. praecox Walter sensu FNA	= RAB	Poaceae	Mono	Occasional	RWT										W1	S2S3	G4		(status and ranks for P. praecox)
Weakley (2012)	Paspalum setaceum Michx. var. muhlenbergii (Nash) D.J. Banks	= Weakley	= FNA	< P. setaceum Michx. sensu RAB	Poaceae	Mono	Infrequent	RWT
Weakley (2012)	Paspalum setaceum Michx. var. setaceum	= Weakley	= FNA	< P. setaceum Michx. sensu RAB	Poaceae	Mono	Occasional	RWT
Weakley (2012)	Saccharum baldwinii Spreng.	= Weakley	= FNA	= Erianthus strictus Baldwin sensu RAB	Poaceae	Mono	Infrequent	RWT
Weakley (2012)	Saccharum coarctatum (Fernald) R.D. Webster	= Weakley	= FNA	< Erianthus brevibarbis Michx. sensu RAB	Poaceae	Mono	Occasional	RWT
Weakley (2012)	Smilax smallii Morong	= Weakley	= FNA	= RAB	Smilacaceae	Mono	Occasional	RWT
Weakley (2012)	Xyris fimbriata Elliott	= Weakley	= FNA	= RAB	Xyridaceae	Mono	Infrequent	RWT
Weakley (2012)	Asclepias pedicellata Walter	= Weakley		= RAB	Apocynaceae	Dico	Rare	RWT										SR-P	S3	G4
Weakley (2012)	Eupatorium recurvans Small	= Weakley	< E. mohrii Greene sensu FNA	< RAB	Asteraceae	Dico	Infrequent	RWT										W7	S1?	G3G4Q
Weakley (2012)	Liatris pilosa (Aiton) Willd.	= Weakley	= FNA	< L. graminifolia Willd. sensu RAB	Asteraceae	Dico	Infrequent	RWT
Weakley (2012)	Solidago gracillima Torr. & A. Gray	= Weakley	= S. stricta Aiton ssp. gracillima (Torr. & A. Gray) Semple sensu FNA	= RAB	Asteraceae	Dico	Occasional	RWT										W1	S3	G4?
Weakley (2012)	Cuscuta gronovii Willd. ex Roem. & Schult.	= Weakley		= RAB	Convolvulaceae	Dico	Rare	RWT
Weakley (2012)	Amorpha georgiana Wilbur	= Weakley		< RAB	Fabaceae	Dico	Rare	RWT									FSC	E	S2	G3T2
Weakley (2012)	Apios americana Medik.	= Weakley		= RAB	Fabaceae	Dico	Rare	RWT
Weakley (2012)	Lespedeza angustifolia (Pursh) Elliott	= Weakley		= RAB	Fabaceae	Dico	Rare	RWT
Weakley (2012)	Quercus coccinea Münchh.	= Weakley	= FNA	= RAB	Fagaceae	Dico	Infrequent	RWT
Weakley (2012)	Quercus marilandica Münchh. var. marilandica	= Weakley	= FNA	< Q. marilandica Münchh. sensu RAB	Fagaceae	Dico	Infrequent	RWT
Weakley (2012)	Gentiana saponaria L.	= Weakley		= RAB	Gentianaceae	Dico	Rare	RWT
Weakley (2012)	Hypericum canadense L.	= Weakley		= RAB	Hypericaceae	Dico	Infrequent	RWT
Weakley (2012)	Hypericum cistifolium Lam.	= Weakley		= RAB	Hypericaceae	Dico	Frequent	RWT
Weakley (2012)	Hypericum denticulatum Walter	= Weakley		= H. denticulatum Walter var. denticulatum sensu RAB	Hypericaceae	Dico	Infrequent	RWT
Weakley (2012)	Hypericum mutilum L. var. mutilum	= Weakley		< H. mutilum L. sensu RAB	Hypericaceae	Dico	Occasional	RWT
Weakley (2012)	Pycnanthemum setosum Nutt.	= Weakley		= RAB	Lamiaceae	Dico	rare	RWT										SR-T	S2	G4
Weakley (2012)	Lindernia dubia (L.) Pennell var. anagallidea (Michx.) Cooperr.	= Weakley		< L. anagallidea (Michx.) Pennell sensu RAB	Linderniaceae	Dico	Rare	RWT
Weakley (2012)	Rhexia mariana L. var. exalbida Michx.	= Weakley		= RAB	Melastomataceae	Dico	Occasional	RWT
Weakley (2012)	Oldenlandia uniflora L.	= Weakley		= RAB	Rubiaceae	Dico	Infrequent	RWT
Weakley (2012)	Viola brittoniana Pollard	= Weakley		> V. brittoniana Pollard var. brittoniana, V. brittoniana Pollard var. pectinata (E.P. Bicknell) Alexander sensu RAB	Violaceae	Dico	Rare	RWT										W7	S2?	G4G5
Weakley (2012)	Viola lanceolata L. var. vittata (Greene) Weath. & Griscom	= Weakley		< V. lanceolata L. sensu RAB	Violaceae	Dico	Infrequent	RWT
Weakley (2012)	Viola septemloba Leconte	= Weakley		< RAB	Violaceae	Dico	Infrequent	RWT
Weakley (2012)	Eriocaulon compressum Lam.	= Weakley	= FNA	= RAB	Eriocaulaceae	Mono				RJL
Weakley (2012)	Hypoxis curtissii Rose	= Weakley	= FNA	= H. hirsuta (L.) Coville var. leptocarpa (Engelm. & A. Gray) Brackett sensu RAB	Hypoxidaceae	Mono				RJL
Weakley (2012)	Dichanthelium acuminatum (Sw.) Gould & C.A. Clark var. lindheimeri (Nash) Gould & C.A. Clark	= Weakley	= D. acuminatum (Sw.) Gould & C.A. Clark ssp. lindheimeri (Nash) Freckmann & Lelong sensu FNA	< Panicum lanuginosum Elliott sensu RAB	Poaceae	Mono				RJL
Weakley (2012)	Xyris jupicai Rich.	= Weakley	= FNA	= RAB	Xyridaceae	Mono				RJL
FNA	Vaccinium stamineum L.	> V. stamineum L. various varieties sensu Weakley	= FNA	> V. stamineum L. var. stamineum sensu RAB	Ericaceae	Dico				RJL
Weakley (2012)	Tephrosia florida (F. Dietr.) C.E. Wood	= Weakley		= RAB	Fabaceae	Dico				RJL
Weakley (2012)	Agalinis setacea (J.F. Gmel.) Raf.	= Weakley		= RAB	Orobanchaceae	Dico				RJL
Weakley (2012)	Scleria ciliata Michx. var. glabra (Chapm.) Fairey	= Weakley	= FNA	< S. ciliata Michx. sensu RAB	Cyperaceae	Mono				RJL (SSCF)

## Sheet: SARU + V taxa
Taxonomic Source	Taxa include in keys but not formally treated in manuscript (i.e., because taxon occurs in a habitat not technically included in thesis, such as roadsides, etc.). Y = yes; blank = no.	Taxon	Synonymy with Weakley 2012	Synonymy with Flora of North America (=FNA)	Synonymy with Radford, Ahles, and Bell (=RAB)	Family	Clade (F+FA = fern and fern allies; Gymn = Gymnosperms; Basal Angio = basal angiosperms; Mono = monocots; Dico = eudicots)	Abundance	Collected in Shaken Creek Preserve by the author (RWT = Robert Thornhill)	Collected in Shaken Creek Preserve by someone besides the author (RJL = Richard LeBlond; Sorrie =Bruce Sorrie). See herbarium research supplementary file for more information.	Reported from Shaken Creek Preserve but no vouchers have been seen by the author.	Collected in Sandy Run State Natural Area by John Taggart (JBT). See Taggart 2010.	Collected in Sandy Run State Natural Area by Wilbur, a collector with an extensive collection at DUKE. See herbarium research supplementary file for more information.	Collected in Sandy Run State Natural Area by someone besides JBT or Wil. See herbarium research supplementary file for more information.	Collected in Sandy Run State Natural Area by someone besides JBT or Wil. See herbarium research supplementary file for more information.	Report from Sandy Run State Natural Area. (Neck = LeBlond and Weakley 1991; JBT = reported by Taggart (2010), but basis of report is unknown).	Coll vicinity	FS (Federal Status)	SS (State Status)	SR (State Rank)	GR (Global Rank)	Exotic? (y = yes; blank = no)
Weakley (2012)		Uvularia puberula Michx.	= Weakley	= FNA	= U. pudica (Walter) Fernald sensu RAB	Colchicaceae	Mono					JBT
Weakley (2012)		Bulbostylis stenophylla (Elliott) C.B. Clarke	= Weakley	= FNA	= RAB	Cyperaceae	Mono						Wil
Weakley (2012)		Carex chapmanii Steud.	= Weakley	= FNA	= RAB	Cyperaceae	Mono									JBT (Watkins)			W1	S3	G3
FNA		Carex leptalea Wahlenb. ssp. harperi (Fernald) Calder & Roy L. Taylor	= C. leptalea Wahlenb. var. harperi (Fernald) sensu Weakley	= FNA	< C. leptalea Wahlenb. sensu RAB	Cyperaceae	Mono									JBT (Watkins)
Weakley (2012)		Carex physorhyncha Liebm. ex Steud.	= Weakley	= C. albicans Willd. ex Spreng. var. australis (L.H. Bailey) Rettig sensu FNA	= RAB	Cyperaceae	Mono									Neck			W1	S2S3	G5T5
FNA		Carex venusta Dewey	> C. venusta Dewey, C. oblita Steud. sensu Weakley	= FNA	= RAB	Cyperaceae	Mono							Sorrie
Weakley (2012)		Cyperus haspan L.	= Weakley	= FNA	= RAB	Cyperaceae	Mono					JBT	Wil
Weakley (2012)		Eleocharis obtusa (Willd.) Schult.	= Weakley	= FNA	< E. ovata R. Br. sensu RAB	Cyperaceae	Mono						Wil
FNA		Rhynchospora corniculata (Lam.) A. Gray	< R. corniculata (Lam.) A. Gray var. corniculata sensu Weakley	= FNA	= RAB	Cyperaceae	Mono									Neck
Weakley (2012)		Rhynchospora debilis Gale	= Weakley	= FNA	= RAB	Cyperaceae	Mono							RJL
Weakley (2012)		Rhynchospora divergens Chapm. ex M.A. Curtis	= Weakley	= FNA	= RAB	Cyperaceae	Mono					JBT		RJL					SR-P	S2	G4
Weakley (2012)		Rhynchospora glomerata (L.) Vahl var. glomerata	= Weakley	< R. glomerata (L.) Vahl sensu FNA	< R. glomerata (L.) Vahl sensu RAB	Cyperaceae	Mono					JBT
Weakley (2012)		Rhynchospora microcephala (Britton) Britton ex Small	= Weakley	= FNA	= RAB	Cyperaceae	Mono							RJL
Weakley (2012)		Rhynchospora mixta Britton	= Weakley	= FNA	= RAB	Cyperaceae	Mono									RJL
Weakley (2012)		Rhynchospora oligantha A. Gray	= Weakley	= FNA	= RAB	Cyperaceae	Mono					JBT							WI	S3	G4
Weakley (2012)		Rhynchospora scirpoides (Torr.) Griseb.	= Weakley	= FNA	= Psilocarya scirpoides Torr. sensu RAB	Cyperaceae	Mono						Wil						W1	S3	G4
Weakley (2012)		Scirpus lineatus Michx.	= Weakley	= FNA	= S. fontinalis R.M. Harper sensu RAB	Cyperaceae	Mono					JBT							SR-P	S2	G4
Weakley (2012)		Scleria species 1	= Weakley			Cyperaceae	Mono					JBT		RJL				FSC	SR-L	S1	G1
Weakley (2012)		Scleria verticillata Muhl. ex Willd.	= Weakley	= FNA	= RAB	Cyperaceae	Mono							RJL					SR-P	S2	G5
Weakley (2012)		Syngonanthus flavidulus (Michx.) Ruhland	= Weakley	= FNA	= RAB	Eriocaulaceae	Mono										LeGrand		W1	S3	G5
Weakley (2012)		Sisyrinchium albidum Raf.	= Weakley	= FNA	< RAB	Iridaceae	Mono									Neck
Weakley (2012)		Sisyrinchium arenicola E.P. Bicknell	= Weakley	< S. fuscatum E.P. Bicknell sensu FNA		Iridaceae	Mono						Wil
Weakley (2012)		Juncus acuminatus Michx.	= Weakley	= FNA	= RAB	Juncaceae	Mono						Wil
Weakley (2012)		Juncus diffusissimus Buckley	= Weakley	= FNA	= RAB	Juncaceae	Mono						Wil
Weakley (2012)		Platanthera nivea (Nutt.) Luer	= Weakley	= FNA	= Habenaria nivea (Nutt.) Spreng. sensu RAB	Orchidaceae	Mono									Neck			T	S1	G5
Weakley (2012)		Spiranthes lacera (Raf.) Raf. var. gracilis (Bigelow) Luer	= Weakley	= FNA	= S. gracilis (Bigelow) Beck var. gracilis sensu RAB	Orchidaceae	Mono					JBT
Weakley (2012)		Spiranthes longilabris Lindl.	= Weakley	= FNA	= RAB	Orchidaceae	Mono									NHP			T	S1	G3
Weakley (2012)		Andropogon mohrii (Hack.) Hack. ex Vasey	= Weakley	= A. liebmannii Hack. var. pungensis (Ashe) C.S. Campb. sensu FNA	= RAB	Poaceae	Mono					JBT							SR-P	S2	G4?
Weakley (2012)		Arundinaria gigantea (Walter) Muhl.	= Weakley	= FNA	< RAB	Poaceae	Mono					JBT
Weakley (2012)		Dichanthelium acuminatum (Sw.) Gould & C.A. Clark var. acuminatum	= Weakley	= D. acuminatum (Sw.) Gould & C.A. Clark var. acuminatum sensu FNA	< Panicum lanuginosum Elliott sensu RAB	Poaceae	Mono					JBT
Weakley (2012)		Dichanthelium dichotomum (L.) Gould var. dichotomum	= Weakley	= D. dichotomum (L.) Gould ssp. dichotomum sensu FNA	< Panicum dichotomum L. sensu RAB	Poaceae	Mono									RJL (CMPS)
Weakley (2012)		Dichanthelium ovale (Elliott) Gould & C.A. Clark var. addisonii (Nash) Gould & C.A. Clark	= Weakley	= D. ovale (Elliott) Gould & C.A. Clark ssp. pseudopubescens (Nash) Freckmann & Lelong sensu FNA	= Panicum commonsianum Ashe sensu RAB	Poaceae	Mono									Neck
Weakley (2012)		Dichanthelium species 12 (= chrysopsidifolium)	= Weakley	< D. consanguineum (Kunth) Gould & C.A. Clark sensu FNA	< Panicum consanguineum Kunth sensu RAB	Poaceae	Mono					JBT
Weakley (2012)		Panicum hemitomon Schult.	= Weakley	= FNA	= RAB	Poaceae	Mono					JBT
Weakley (2012)		Paspalum floridanum Michx.	= Weakley	= FNA	= RAB	Poaceae	Mono						Wil
Weakley (2012)		Paspalum setaceum Michx. var. ciliatifolium (Michx.) Vasey	= Weakley	= FNA	< P. setaceum Michx. sensu RAB	Poaceae	Mono					JBT
Weakley (2012)		Saccharum brevibarbe (Michx.) Pers. var. contortum (Elliott) R.D. Webster	= Weakley	= FNA	= Erianthus contortus Elliott sensu RAB	Poaceae	Mono					JBT
Weakley (2012)		Trillium pusillum Michx. var. pusillum	= Weakley	< FNA	< T. pusillum Michx. sensu RAB	Trilliaceae	Mono									Neck		FSC	E	S2	G3T2
Weakley (2012)		Xyris flabelliformis Chapm.	= Weakley	= FNA	= RAB	Xyridaceae	Mono									RJL			W1	S1	G4
Weakley (2012)		Xyris floridana (Kral) E.L. Bridges & Orzell	= Weakley	= X. difformis Chapm. var. floridana Kral sensu FNA		Xyridaceae	Mono									RJL			SR-P	S1	G5T4T5
Weakley (2012)		Xyris iridifolia Chapm.	= Weakley	= X. laxifolia Mart. var. iridifolia (Chapm.) Kral sensu FNA	=	Xyridaceae	Mono					JBT							W7	S2	G4G5T4T5
Weakley (2012)		Xyris scabrifolia R.M. Harper	= Weakley	< FNA		Xyridaceae	Mono							McMillan				FSC	SR-T	S2	G3
Weakley (2012)		Eryngium aquaticum L. var. ravenelii (A. Gray) Mathias & Constance	= Weakley		= RAB	Apiaceae	Dico					JBT	Wil	RJL					SR-P	S1	G4T2T4Q
Weakley (2012)		Asclepias rubra L.	= Weakley		= RAB	Apocynaceae	Dico					JBT	Wil
Weakley (2012)		Aralia spinosa L.	= Weakley		= RAB	Araliaceae	Dico					JBT
Weakley (2012)		Arnica acaulis (Walter) Britton, Sterns & Poggenb.	= Weakley	= FNA	= RAB	Asteraceae	Dico									Neck
Weakley (2012)		Baccharis glomeruliflora Pers.	= Weakley	= FNA	= RAB	Asteraceae	Dico	Rare				JBT							SR-P	SH	G4
Weakley (2012)		Chrysopsis mariana (L.) Elliott	= Weakley	= FNA	= Heterotheca mariana (L.) Shinners sensu RAB	Asteraceae	Dico					JBT
Weakley (2012)		Cirsium repandum Michx.	= Weakley	= FNA	= Carduus repandus (Michx.) Pers. sensu RAB	Asteraceae	Dico					JBT
Weakley (2012)		Coreopsis palustris Sorrie	= Weakley	< C. gladiata Walter sensu FNA	= C. helianthoides Beadle sensu RAB	Asteraceae	Dico					JBT							SR-P	S1S2	G3G4Q
Weakley (2012)		Eupatorium hyssopifolium L.	= Weakley	= E. hyssopifolium L. var. hyssopifolium sensu FNA	< RAB	Asteraceae	Dico					JBT	Wil
Weakley (2012)		Eupatorium mohrii Greene	= Weakley	< FNA	< E. recurvans Small sensu RAB	Asteraceae	Dico					JBT
Weakley (2012)		Eupatorium perfoliatum L.	= Weakley	= FNA	= RAB	Asteraceae	Dico					JBT	Wil
Weakley (2012)		Helenium pinnatifidum (Schwein. ex Nutt.) Rydb.	= Weakley	= FNA	= RAB	Asteraceae	Dico									Neck			SR-P	S2	G4
FNA		Packera paupercula (Michx.) Á. Löve & D. Löve	> P. crawfordii (Britton) A.M. Mahoney & R.R. Kowal, P. paupercula (Michx.) Á. Löve & D. Löve var. paupercula sensu Weakley	= FNA	= Senecio pauperculus Michx. sensu RAB	Asteraceae	Dico					JBT		RJL	Weakley				SR-T	S1	G2G3		(status and ranks for P. crawfordii)
Weakley (2012)		Pluchea baccharis (Mill.) Pruski	= Weakley	= FNA	= P. rosea R.K. Godfrey sensu RAB	Asteraceae	Dico									RJL
Weakley (2012)		Silphium compositum Michx. var. compositum	= Weakley	< S. compositum Michx. sensu FNA	< S. compositum Michx. var. compositum sensu RAB	Asteraceae	Dico					JBT
Weakley (2012)		Solidago fistulosa Mill.	= Weakley	= FNA	= RAB	Asteraceae	Dico					JBT
Weakley (2012)		Solidago odora Aiton	= Weakley	= S. odora Aiton ssp. odora sensu FNA	= RAB	Asteraceae	Dico					JBT
Weakley (2012)		Solidago pinetorum Small	= Weakley	= FNA	= RAB	Asteraceae	Dico					JBT
FNA		Symphyotrichum lateriflorum (L.) Á. Löve & D. Löve	< S. lateriflorum (L.) Á. Löve & D. Löve various varieties sensu Weakley	= FNA	< Aster lateriflorus (L.) Britton sensu RAB	Asteraceae	Dico							RJL
FNA		Symphyotrichum novi-belgii (L.) G.L. Nesom var. elodes (Torr. & A. Gray) G.L. Nesom	= Weakley	= FNA	< Aster novi-belgii L. sensu RAB	Asteraceae	Dico									RJL
FNA		Symphyotrichum pilosum (Willd.) G.L. Nesom var. pilosum	= Weakley	= FNA	< Aster pilosus Willd. sensu RAB	Asteraceae	Dico						Wil
FNA		Vernonia angustifolia Michx.	> V. angustifolia Michx. various varieties sensu Weakley	= FNA	> V. angustifolia Michx. var. angustifolia, V. angustifolia Michx. var. scabberima (Nutt.) S.B. Jones & W.Z. Faust sensu RAB	Asteraceae	Dico									Neck
FNA		Vernonia noveboracensis (L.) Michx.	= Weakley	= FNA	= RAB	Asteraceae	Dico					JBT
Weakley (2012)		Lonicera sempervirens L.	= Weakley		= RAB	Caprifoliaceae	Dico						Wil
Weakley (2012)		Cuscuta pentagona Engelm.	= Weakley		= RAB	Convolvulaceae	Dico					JBT
Weakley (2012)		Chamaedaphne calyculata (L.) Moench	= Weakley	= FNA	= Cassandra calyculata (L.) D. Don sensu RAB	Ericaceae	Dico					JBT					Fox
Weakley (2012)		Leucothoe axillaris (Lam.) D. Don	= Weakley	= FNA	= L. axillaris (Lam.) D. Don var. axillaris sensu RAB	Ericaceae	Dico					JBT
Weakley (2012)		Vaccinium arboreum Marshall	= Weakley	= FNA	= RAB	Ericaceae	Dico					JBT
Weakley (2012)		Baptisia cinerea (Raf.) Fernald & B.G. Schub.	= Weakley		= RAB	Fabaceae	Dico					JBT
Weakley (2012)		Baptisia tinctoria (L.) Vent.	= Weakley		= RAB	Fabaceae	Dico					JBT
Weakley (2012)		Chamaecrista fasciculata (Michx.) Greene var. fasciculata	= Weakley		< Cassia fasciculata Michx. sensu RAB	Fabaceae	Dico					JBT
Weakley (2012)		Crotalaria purshii DC.	= Weakley		= RAB	Fabaceae	Dico									Neck
Weakley (2012)		Desmodium ciliare (Muhl. ex Willd.) DC.	= Weakley		= RAB	Fabaceae	Dico									Neck
Weakley (2012)		Desmodium lineatum (Michx.) DC.	= Weakley		= RAB	Fabaceae	Dico									Neck
Radford, Ahles, & Bell (1968)		Desmodium paniculatum (L.) DC.	> D. paniculatum (L.) DC. var. epepetiolatum B.G. Schub, D. paniculatum (L.) DC. var. paniculatum sensu Weakley		= RAB	Fabaceae	Dico									Neck
Weakley (2012)		Indigofera caroliniana Mill.	= Weakley		= RAB	Fabaceae	Dico					JBT
Weakley (2012)		Strophostyles umbellata (Muhl. ex Willd.) Britton	= Weakley		= RAB	Fabaceae	Dico									Neck
Weakley (2012)		Tephrosia spicata (Walter) Torr. & A. Gray	= Weakley		= RAB	Fabaceae	Dico									Neck
Weakley (2012)		Zornia bracteata J.F. Gmel.	= Weakley		= RAB	Fabaceae	Dico					JBT
Weakley (2012)		Quercus stellata Wangenh.	= Weakley	= FNA	= RAB	Fagaceae	Dico						Wil
Weakley (2012)		Quercus velutina Lam.	= Weakley	= FNA	= RAB	Fagaceae	Dico					JBT
Weakley (2012)		Sabatia angularis (L.) Pursh	= Weakley		= RAB	Gentianaceae	Dico						Wil
Weakley (2012)		Hypericum lloydii (Svenson) W.P. Adams	= Weakley		= RAB	Hypericaceae	Dico					JBT
Weakley (2012)		Hypericum virginicum L.	= Weakley		= RAB	Hypericaceae	Dico							RWT
Weakley (2012)		Carya tomentosa (Poir.) Nutt.	= Weakley	= FNA	= RAB	Juglandaceae	Dico					JBT
Weakley (2012)		Linum floridanum (Planch.) Trel. var. chrysocarpum C.M. Rogers	= Weakley		< L. virginianum L. var. floridanum Planch. sensu RAB	Linaceae	Dico					JBT		RJL					SR-T	S1S2	G5?T3?
Weakley (2012)		Ammannia coccinea Rottb.	= Weakley		= RAB	Lythraceae	Dico						Wil	RJL
FNA		Liriodendron tulipifera L.	> L. tulipifera L. var. 1, L. tulipifera L. var. tulipifera sensu Weakley	= FNA	= RAB	Magnoliaceae	Basal Angio					JBT		Weakley
Weakley (2012)		Nyssa sylvatica Marshall	= Weakley		= N. sylvatica Marshall var. sylvatica sensu RAB	Nyssaceae	Dico					JBT
Weakley (2012)		Agalinis virgata Raf.	= Weakley		= RAB	Orobanchaceae	Dico									Neck			SR-P	S2	G3G4Q
Weakley (2012)		Pedicularis canadensis L.	= Weakley		= RAB	Orobanchaceae	Dico					RJL
Weakley (2012)		Mimulus ringens L. var. ringens	= Weakley		< M. ringens L.sensu RAB	Phrymaceae	Dico					JBT
Weakley (2012)		Penstemon australis Small	= Weakley		< RAB	Plantaginaceae	Dico										Wil
Weakley (2012)		Penstemon laevigatus Aiton	= Weakley		= RAB	Plantaginaceae	Dico					JBT	Wil
Weakley (2012)		Plantago sparsiflora Michx.	= Weakley		= RAB	Plantaginaceae	Dico					JBT	Wil	RJL	Leonard, Levy			FSC	E	S1S2	G3
Weakley (2011)		Polygala verticillata L.	> P. verticillata var. isocycla Fernald, P. verticillata var. verticillata sensu Weakley		= P. verticillata var. verticillata sensu RAB	Polygalaceae	Dico							Bradley
Weakley (2012)		Amelanchier spicata (Lam.) K. Koch	= Weakley		= RAB	Rosaceae	Dico						Wil
Weakley (2012)		Potentilla simplex Michx.	= Weakley		= RAB	Rosaceae	Dico					JBT
Weakley (2012)		Prunus serotina Ehrh. var. serotina	= Weakley		< RAB	Rosaceae	Dico					JBT	Wil
Weakley (2012)		Rubus cuneifolius Pursh	= Weakley		= RAB	Rosaceae	Dico					JBT

## Sheet: SCP and SARU + V taxa
Taxonomic Source	Taxa include in keys but not formally treated in manuscript (i.e., because taxon occurs in a habitat not technically included in thesis, such as roadsides, etc.). Y = yes; blank = no.	Taxon	Synonymy with Weakley 2012	Synonymy with Flora of North America (=FNA)	Synonymy with Radford, Ahles, and Bell (=RAB)	Family	Clade (F+FA = fern and fern allies; Gymn = Gymnosperms; Basal Angio = basal angiosperms; Mono = monocots; Dico = eudicots)	Abundance	Collected in Shaken Creek Preserve by the author (RWT = Robert Thornhill)	Collected in Shaken Creek Preserve by someone besides the author (RJL = Richard LeBlond; Sorrie =Bruce Sorrie). See herbarium research supplementary file for more information.	Reported from Shaken Creek Preserve but no vouchers have been seen by the author.	Collected in Sandy Run State Natural Area by John Taggart (JBT). See Taggart 2010.	Collected in Sandy Run State Natural Area by Wilbur, a collector with an extensive collection at DUKE. See herbarium research supplementary file for more information.	Collected in Sandy Run State Natural Area by someone besides JBT or Wil. See herbarium research supplementary file for more information.	Collected in Sandy Run State Natural Area by someone besides JBT or Wil. See herbarium research supplementary file for more information.	Report from Sandy Run State Natural Area. (Neck = LeBlond and Weakley 1991; JBT = reported by Taggart (2010), but basis of report is unknown).	Coll vicinity	FS (Federal Status)	SS (State Status)	SR (State Rank)	GR (Global Rank)	Exotic? (y = yes; blank = no)
Weakley (2012)		Woodwardia areolata (L.) Moore	= Weakley	= FNA	= RAB	Blechnaceae	F+FA	Occasional	RWT			JBT
Weakley (2012)		Woodwardia virginica (L.) Sm.	= Weakley	= FNA	= RAB	Blechnaceae	F+FA	Frequent	RWT			JBT
FNA		Pteridium aquilinum (L.) Kuhn var. pseudocaudatum (Clute) A. Heller	= Pteridium aquilinum (L.) Kuhn var. pseudocaudatum (Clute) Hulten sensu Weakley	= FNA	= RAB	Dennstaedtiaceae	F+FA	Abundant	RWT			JBT
Weakley (2012)		Lycopodiella alopecuroides (L.) Cranfill	= Weakley	= FNA	< Lycopodium alopecuroides L. sensu RAB	Lycopodiaceae	F+FA	Frequent	RWT			JBT
Weakley (2012)		Lycopodiella appressa (Chapm.) Cranfill	= Weakley	= FNA	= Lycopodium appressum (Chapm.) F.E. Lloyd & Underw. sensu RAB	Lycopodiaceae	F+FA	Occasional	RWT			JBT
Weakley (2012)		Pseudolycopodiella caroliniana (L.) Holub	= Weakley	= FNA	= Lycopodium carolinianum Linnaeus – RAB	Lycopodiaceae	F+FA	Occasional	RWT			JBT
Weakley (2012)		Osmunda spectabilis Willd.	= Weakley	= O. regalis L. var. spectabilis (Willd.) A. Gray sensu FNA	= O. regalis L. var. spectabilis (Willd.) A. Gray sensu RAB	Osmundaceae	F+FA	Occasional	RWT			JBT
Weakley (2012)		Osmundastrum cinnamomeum (L.) C. Presl	= Weakley	= Osmunda cinnamomea L. sensu FNA	= Osmunda cinnamomea L. sensu RAB	Osmundaceae	F+FA	Frequent	RWT			JBT	Wil
Weakley (2012)		Selaginella apoda (L.) C. Morren	= Weakley	= FNA	= RAB	Selaginellaceae	F+FA	Infrequent	RWT			JBT		Sorrie
Weakley (2012)		Chamaecyparis thyoides (L.) Britton, Sterns & Poggenb.	= Weakley	= FNA	= RAB	Cuppressaceae	Gymn	Rare	RWT			JBT		Sieren	Weakley
Weakley (2012)		Juniperus virginiana L. var. virginiana	= Weakley	= FNA	= J. virginiana sensu RAB	Cuppressaceae	Gymn	Rare	RWT
Weakley (2012)		Taxodium ascendens Brongn.	= Weakley	= T. distichum L. var. imbricarium (Nutt.) Croom sensu FNA	= RAB	Cuppressaceae	Gymn	Frequent	RWT			JBT	Wil
Weakley (2012)		Pinus elliottii Engelm. var. elliottii	= Weakley	= FNA	< P. elliottii Engelm. sensu RAB	Pinaceae	Gymn	Infrequent	RWT													y
Weakley (2012)		Pinus palustris Mill.	= Weakley	= FNA	= RAB	Pinaceae	Gymn	Abundant	RWT			JBT
Weakley (2012)		Pinus serotina Michx.	= Weakley	= FNA	= RAB	Pinaceae	Gymn	Abundant	RWT			JBT	Wil
Weakley (2012)		Pinus taeda L.	= Weakley	= FNA	= RAB	Pinaceae	Gymn	Frequent	RWT			JBT
Weakley (2012)		Yucca filamentosa L.	= Weakley	= FNA	= Y. filamentosa L. var. filamentosa sensu RAB	Agavaceae	Mono	Infrequent	RWT			JBT
Weakley (2012)		Allium species 1	= Weakley			Amaryllidaceae	Mono	Rare	RWT			JBT		Leonard	RJL			FSC	SR-L	S1S2	G1G2
Weakley (2012)		Tillandsia usneoides (L.) L.	= Weakley	= FNA	= RAB	Bromeliaceae	Mono	Infrequent	RWT			JBT
Weakley (2012)		Burmannia capitata (Walter ex J.F. Gmel.) Mart.	= Weakley	= FNA	= RAB	Burmanniaceae	Mono	Infrequent	RWT			JBT
Weakley (2012)		Uvularia puberula Michx.	= Weakley	= FNA	= U. pudica (Walter) Fernald sensu RAB	Colchicaceae	Mono					JBT
Weakley (2012)		Bulbostylis stenophylla (Elliott) C.B. Clarke	= Weakley	= FNA	= RAB	Cyperaceae	Mono						Wil
Weakley (2012)		Carex chapmanii Steud.	= Weakley	= FNA	= RAB	Cyperaceae	Mono									JBT (Watkins)			W1	S3	G3
Weakley (2012)		Carex elliottii Schwein. & Torr.	= Weakley	= FNA	= RAB	Cyperaceae	Mono	Infrequent	RWT			JBT
Weakley (2012)		Carex glaucescens Elliott	= Weakley	= FNA	= RAB	Cyperaceae	Mono	Frequent	RWT			JBT	Wil
FNA		Carex leptalea Wahlenb. ssp. harperi (Fernald) Calder & Roy L. Taylor	= C. leptalea Wahlenb. var. harperi (Fernald) sensu Weakley	= FNA	< C. leptalea Wahlenb. sensu RAB	Cyperaceae	Mono									JBT (Watkins)
Weakley (2012)		Carex lonchocarpa Willd. ex Spreng.	= Weakley	= FNA	C. folliculata L. var. australis L.H. Bailey sensu RAB	Cyperaceae	Mono	Occasional	RWT			JBT
Weakley (2012)		Carex lutea LeBlond	= Weakley	= FNA		Cyperaceae	Mono	Infrequent	RWT	Sorrie		JBT						E	E	S2	G2
Weakley (2012)		Carex physorhyncha Liebm. ex Steud.	= Weakley	= C. albicans Willd. ex Spreng. var. australis (L.H. Bailey) Rettig sensu FNA	= RAB	Cyperaceae	Mono									Neck			W1	S2S3	G5T5
FNA		Carex striata Michx.	> C. striata Michx. var. brevis L.H. Bailey, C. striata Michx. var striata sensu Weakley	= FNA	= C. walteriana L.H. Bailey sensu RAB	Cyperaceae	Mono	Occasional	RWT			JBT
FNA		Carex venusta Dewey	> C. venusta Dewey, C. oblita Steud. sensu Weakley	= FNA	= RAB	Cyperaceae	Mono							Sorrie
Weakley (2012)		Cladium jamaicense Crantz	= Weakley	= FNA	= RAB	Cyperaceae	Mono	Infrequent	RWT			JBT
Weakley (2012)		Cladium mariscoides (Muhl.) Torr.	= Weakley	= FNA	= RAB	Cyperaceae	Mono				RJL					RJL (Haw's Run)			SR-O	S3	G5
Weakley (2012)		Cyperus haspan L.	= Weakley	= FNA	= RAB	Cyperaceae	Mono					JBT	Wil
Weakley (2012)		Dulichium arundinaceum (L.) Britton var. arundinaceum	= Weakley	= FNA	< D. arundinaceum (L.) Britton sensu RAB	Cyperaceae	Mono	Infrequent	RWT			JBT
Weakley (2012)		Eleocharis baldwinii (Torr.) Chapm.	= Weakley	= FNA	= RAB	Cyperaceae	Mono	Infrequent	RWT
Weakley (2012)		Eleocharis equisetoides (Elliott) Torr.	= Weakley	= FNA	= RAB	Cyperaceae	Mono	Rare	RWT	RJL									W1	S3	G4
Weakley (2012)		Eleocharis microcarpa Torr. var. filiculmis Torr.	= Weakley	= FNA	< E. microcarpa Torr. sensu RAB	Cyperaceae	Mono	Occasional	RWT			JBT
Weakley (2012)		Eleocharis obtusa (Willd.) Schult.	= Weakley	= FNA	< E. ovata R. Br. sensu RAB	Cyperaceae	Mono						Wil
Weakley (2012)		Eleocharis tuberculosa (Michx.) Roem. & Schult.	= Weakley	= FNA	= RAB	Cyperaceae	Mono	Occasional	RWT			JBT
Weakley (2012)		Fimbristylis puberula (Michx.) Vahl var. puberula	= Weakley	= FNA	< F. spadicea (L.) Vahl sensu RAB	Cyperaceae	Mono	Infrequent	RWT			JBT
Weakley (2012)		Fuirena breviseta (Coville) Coville	= Weakley	= FNA	< F. squarrosa Michx. sensu RAB	Cyperaceae	Mono	Infrequent	RWT			JBT	Wil
Weakley (2012)		Fuirena pumila (Torr.) Spreng.	= Weakley	= FNA	= RAB	Cyperaceae	Mono	Rare	RWT
Weakley (2012)		Isolepis carinata Hook. & Arn. ex Torr.	= Weakley	= FNA	= Scirpus koilolepis (Steud.) Gleason sensu RAB	Cyperaceae	Mono	Rare	RWT										SR-P	S1	G5
Weakley (2012)		Kyllinga odorata Vahl	= Weakley	= FNA	= Cyperus sesquiflorus (Torr.) Mattf. & Kük. sensu RAB	Cyperaceae	Mono	Infrequent	RWT			JBT
Weakley (2012)		Rhynchospora baldwinii A. Gray	= Weakley	= FNA	= RAB	Cyperaceae	Mono	Infrequent	RWT							JBT
Weakley (2012)		Rhynchospora caduca Elliott	= Weakley	= FNA	= RAB	Cyperaceae	Mono	Frequent	RWT			JBT	Wil
Weakley (2012)		Rhynchospora cephalantha A. Gray var. cephalantha	= Weakley	< R. cephalantha A. Gray sensu FNA	< R. cephalantha A. Gray sensu RAB	Cyperaceae	Mono	Frequent	RWT			JBT
Weakley (2012)		Rhynchospora chalarocephala Fernald & Gale	= Weakley	= FNA	= RAB	Cyperaceae	Mono	Frequent	RWT			JBT	Wil
Weakley (2012)		Rhynchospora chapmanii M.A. Curtis	= Weakley	= FNA	= RAB	Cyperaceae	Mono	Occasional	RWT			JBT	Wil
Weakley (2012)		Rhynchospora ciliaris (Michx.) C. Mohr	= Weakley	= FNA	= RAB	Cyperaceae	Mono	Frequent	RWT			JBT	Wil
Weakley (2012)		Rhynchospora colorata (L.) H. Pfeiff.	= Weakley	= FNA	= Dichromena colorata (L.) H. Pfeiff. sensu RAB	Cyperaceae	Mono	Infrequent	RWT			JBT
FNA		Rhynchospora corniculata (Lam.) A. Gray	< R. corniculata (Lam.) A. Gray var. corniculata sensu Weakley	= FNA	= RAB	Cyperaceae	Mono									Neck
Weakley (2012)		Rhynchospora debilis Gale	= Weakley	= FNA	= RAB	Cyperaceae	Mono							RJL
Weakley (2012)		Rhynchospora decurrens Chapm.	= Weakley	= FNA	= RAB	Cyperaceae	Mono	Rare	RWT							JBT		FSC	SR-P	S1S2	G3G4
Weakley (2012)		Rhynchospora distans (Michx.) Vahl	= Weakley	< R. fascicularis (Michx.) Vahl sensu FNA	< R. fascicularis (Michx.) Vahl sensu RAB	Cyperaceae	Mono	Infrequent	RWT			JBT
Weakley (2012)		Rhynchospora divergens Chapm. ex M.A. Curtis	= Weakley	= FNA	= RAB	Cyperaceae	Mono					JBT		RJL					SR-P	S2	G4
Weakley (2012)		Rhynchospora fascicularis (Michx.) Vahl	= Weakley	< FNA	< RAB	Cyperaceae	Mono				RJL					RJL (Haw's Run)
Weakley (2012)		Rhynchospora filifolia A. Gray	= Weakley	= FNA	= RAB	Cyperaceae	Mono	Frequent	RWT
Weakley (2012)		Rhynchospora galeana Naczi, W.M. Knapp & G. Moor	= Weakley	= R. breviseta (Gale) Channell sensu FNA	= R. breviseta (Gale) Channell sensu RAB	Cyperaceae	Mono	Infrequent	RWT			JBT							SR-P	S2S3	G3G4
Weakley (2012)		Rhynchospora globularis (Chapm.) Small	= Weakley	< R. globularis (Chapm.) Small var. globularis sensu FNA	< RAB	Cyperaceae	Mono	Infrequent	RWT							JBT
Weakley (2012)		Rhynchospora glomerata (L.) Vahl var. glomerata	= Weakley	< R. glomerata (L.) Vahl sensu FNA	< R. glomerata (L.) Vahl sensu RAB	Cyperaceae	Mono					JBT
Weakley (2012)		Rhynchospora gracilenta A. Gray	= Weakley	= FNA	= RAB	Cyperaceae	Mono	Occasional	RWT			JBT
Weakley (2012)		Rhynchospora inexpansa (Michx.) Vahl	= Weakley	= FNA	= RAB	Cyperaceae	Mono	Frequent	RWT			JBT	Wil
Weakley (2012)		Rhynchospora latifolia (Baldwin) W.W. Thomas	= Weakley	= FNA	= Dichromena latifolia Baldwin ex Elliott sensu RAB	Cyperaceae	Mono	Occasional	RWT			JBT	Wil	Levy
Weakley (2012)		Rhynchospora macrostachya Torr. ex A. Gray	= Weakley	= FNA	= RAB	Cyperaceae	Mono	Infrequent	RWT			JBT	Wil
Weakley (2012)		Rhynchospora microcarpa Baldwin ex A. Gray	= Weakley	= FNA	= RAB	Cyperaceae	Mono	Infrequent	RWT										SR-P	S2	G5
Weakley (2012)		Rhynchospora microcephala (Britton) Britton ex Small	= Weakley	= FNA	= RAB	Cyperaceae	Mono							RJL
Weakley (2012)		Rhynchospora mixta Britton	= Weakley	= FNA	= RAB	Cyperaceae	Mono									RJL
Weakley (2012)		Rhynchospora nitens (Vahl) A. Gray	= Weakley	= FNA	= Psilocarya nitens (Vahl) Alph. Wood sensu RAB	Cyperaceae	Mono	Occasional	RWT			JBT							WI	S3	G4?
Weakley (2012)		Rhynchospora oligantha A. Gray	= Weakley	= FNA	= RAB	Cyperaceae	Mono					JBT							WI	S3	G4
Weakley (2012)		Rhynchospora pallida M.A. Curtis	= Weakley	= FNA	= RAB	Cyperaceae	Mono	Infrequent	RWT			JBT							WI	S3	G3
Weakley (2012)		Rhynchospora pinetorum Britton & Small	= Weakley	= R. globularis (Chapm.) Small var. pinetorum (Britton & Small) Gale sensu FNA	< R. globularis (Chapm.) Small sensu RAB	Cyperaceae	Mono	Infrequent	RWT			JBT							SR-T	S2	G5?T3?
Weakley (2012)		Rhynchospora plumosa Elliott	= Weakley	= FNA	= RAB	Cyperaceae	Mono	Frequent	RWT			JBT	Wil
Weakley (2012)		Rhynchospora pusilla Chapm. ex M.A. Curtis	= Weakley	= FNA	= R. intermixta C. Wright sensu RAB	Cyperaceae	Mono	Occasional	RWT			JBT
Weakley (2012)		Rhynchospora rariflora (Michx.) Elliott	= Weakley	= FNA	= RAB	Cyperaceae	Mono	Occasional	RWT							JBT
Weakley (2012)		Rhynchospora scirpoides (Torr.) Griseb.	= Weakley	= FNA	= Psilocarya scirpoides Torr. sensu RAB	Cyperaceae	Mono						Wil						W1	S3	G4
Weakley (2012)		Rhynchospora thornei Kral	= Weakley	= FNA		Cyperaceae	Mono	Infrequent		RJL		JBT	Wil	RJL				FSC	E	S2	G3
Weakley (2012)		Rhynchospora torreyana A. Gray	= Weakley	= FNA	= RAB	Cyperaceae	Mono	Occasional	RWT			JBT	Wil
Weakley (2012)		Rhynchospora wrightiana Boeck.	= Weakley	= FNA	= RAB	Cyperaceae	Mono	Infrequent	RWT							JBT			W1	S3	G5
Weakley (2012)		Schoenoplectus pungens (Vahl) Palla var. pungens	= Weakley	= FNA	< Scirpus americanus (Pers.) sensu RAB	Cyperaceae	Mono	Infrequent	RWT
Weakley (2012)		Scirpus cyperinus (L.) Kunth	= Weakley	= FNA	= RAB	Cyperaceae	Mono	Rare	RWT			JBT	Wil
Weakley (2012)		Scirpus lineatus Michx.	= Weakley	= FNA	= S. fontinalis R.M. Harper sensu RAB	Cyperaceae	Mono					JBT							SR-P	S2	G4
Weakley (2012)		Scleria baldwinii (Torr.) Steud.	= Weakley	= FNA	= RAB	Cyperaceae	Mono	Infrequent	RWT										SR-P	S2	G4
Weakley (2012)		Scleria ciliata Michx. var. ciliata	= Weakley	= FNA	< S. ciliata Michx. sensu RAB	Cyperaceae	Mono	Occasional	RWT
Weakley (2012)		Scleria ciliata Michx. var. glabra (Chapm.) Fairey	= Weakley	= FNA	< S. ciliata Michx. sensu RAB	Cyperaceae	Mono				RJL (SSCF)
Weakley (2012)		Scleria georgiana Core	= Weakley	= FNA	= RAB	Cyperaceae	Mono				RJL	JBT				RJL (Haw's Run)			W1	S3	G4
Weakley (2012)		Scleria minor (Britton) W. Stone	= Weakley	= FNA	= RAB	Cyperaceae	Mono	Infrequent	RWT			JBT		RJL
Weakley (2012)		Scleria muehlenbergii Steud.	= Weakley	= FNA	< S. reticularis Michx. sensu RAB	Cyperaceae	Mono	Occasional	RWT			JBT
Weakley (2012)		Scleria pauciflora Muhl. ex Willd. var. caroliniana (Willd.) Alph. Wood	= Weakley	= FNA	< S. pauciflora Muhl. ex Willd. sensu RAB	Cyperaceae	Mono	Occasional	RWT			JBT
Weakley (2012)		Scleria species 1	= Weakley			Cyperaceae	Mono					JBT		RJL				FSC	SR-L	S1	G1
Weakley (2012)		Scleria triglomerata Michx.	= Weakley	< S. triglomerata Michx. sensu FNA	< S. triglomerata Michx. sensu RAB	Cyperaceae	Mono	Occasional	RWT			JBT
Weakley (2012)		Scleria verticillata Muhl. ex Willd.	= Weakley	= FNA	= RAB	Cyperaceae	Mono							RJL					SR-P	S2	G5
Weakley (2012)		Dioscorea villosa L.	= Weakley	= FNA	> D. villosa L. var. villosa, D. villosa L. var. hirticaulis (Bartlett) H.E. Ahles sensu RAB	Dioscoreaceae	Mono	Rare	RWT			JBT
Weakley (2012)		Eriocaulon compressum Lam.	= Weakley	= FNA	= RAB	Eriocaulaceae	Mono				RJL
Weakley (2012)		Eriocaulon decangulare L. var. decangulare	= Weakley	= FNA	< E. decangulare L. sensu RAB	Eriocaulaceae	Mono	Frequent	RWT			JBT	Wil
Weakley (2012)		Lachnocaulon anceps (Walter) Morong	= Weakley	= FNA	= RAB	Eriocaulaceae	Mono	Frequent	RWT			JBT	Wil
Weakley (2012)		Syngonanthus flavidulus (Michx.) Ruhland	= Weakley	= FNA	= RAB	Eriocaulaceae	Mono										LeGrand		W1	S3	G5
Weakley (2012)		Lachnanthes caroliniana (Lam.) Dandy	= Weakley	= FNA	= RAB	Haemodoraceae	Mono	Frequent	RWT			JBT	Wil
Weakley (2012)		Chamaelirium luteum (L.) A. Gray	= Weakley	= FNA	= RAB	Heloniadaceae	Mono	Rare	RWT										W5B	S5	G5
Weakley (2012)		Hypoxis curtissii Rose	= Weakley	= FNA	= H. hirsuta (L.) Coville var. leptocarpa (Engelm. & A. Gray) Brackett sensu RAB	Hypoxidaceae	Mono				RJL
Weakley (2012)		Hypoxis hirsuta (L.) Coville	= Weakley	= FNA	= H. hirsuta (L.) Coville var. hirsuta sensu RAB	Hypoxidaceae	Mono	Frequent	RWT			JBT
Weakley (2012)		Hypoxis sessilis L.	= Weakley	= FNA	= RAB	Hypoxidaceae	Mono	Occasional	RWT										SR-P	SH	G4
Weakley (2012)		Hypoxis wrightii (Baker) Brackett	= Weakley	= FNA	= H. micrantha Pollard sensu RAB	Hypoxidaceae	Mono	Occasional	RWT			JBT
Weakley (2012)		Iris tridentata Pursh	= Weakley	= FNA	= RAB	Iridaceae	Mono	Occasional	RWT			JBT	Wil	Levy
Weakley (2012)		Iris verna L. var. verna	= Weakley	= FNA	= RAB	Iridaceae	Mono	Frequent	RWT			JBT	Wil
Weakley (2012)		Iris virginica L. var. virginica	= Weakley	= FNA	< I. virginica L. sensu RAB	Iridaceae	Mono	Occasional	RWT			JBT
Weakley (2012)		Sisyrinchium albidum Raf.	= Weakley	= FNA	< RAB	Iridaceae	Mono									Neck
Weakley (2012)		Sisyrinchium angustifolium Mill.	= Weakley	= FNA	= RAB	Iridaceae	Mono	Occasional	RWT
Weakley (2012)		Sisyrinchium arenicola E.P. Bicknell	= Weakley	< S. fuscatum E.P. Bicknell sensu FNA		Iridaceae	Mono						Wil
Weakley (2012)		Sisyrinchium atlanticum E.P. Bicknell	= Weakley	= FNA	= S. mucronatum Michx. var. atlanticum (E.P. Bicknell) H.E. Ahles sensu RAB	Iridaceae	Mono	Occasional	RWT			JBT
Weakley (2012)		Sisyrinchium capillare E.P. Bicknell	= Weakley	= FNA	< S. albidum Raf. sensu RAB	Iridaceae	Mono	Occasional	RWT			JBT
Weakley (2012)		Juncus acuminatus Michx.	= Weakley	= FNA	= RAB	Juncaceae	Mono						Wil
Weakley (2012)		Juncus biflorus Elliott	= Weakley	< J. marginatus Rostk. sensu FNA	= RAB	Juncaceae	Mono	Frequent	RWT			JBT
Weakley (2012)		Juncus bufonius L.	= Weakley	= FNA	= RAB	Juncaceae	Mono	Occasional	RWT			JBT	Wil
Weakley (2012)		Juncus canadensis J. Gay ex Laharpe	= Weakley	= FNA	= RAB	Juncaceae	Mono	Rare	RWT			JBT
Weakley (2012)		Juncus coriaceus Mack.	= Weakley	= FNA	= RAB	Juncaceae	Mono	Infrequent	RWT			JBT
Weakley (2012)		Juncus dichotomus Elliott	= Weakley	= FNA	> J. dichotomus Elliott, J. platyphyllus (Wiegand) Fernald sensu RAB	Juncaceae	Mono	Frequent	RWT			JBT	Wil
Weakley (2012)		Juncus diffusissimus Buckley	= Weakley	= FNA	= RAB	Juncaceae	Mono						Wil
Weakley (2012)		Juncus effusus L. ssp. solutus (Fernald & Wiegand) Hämet-Ahti	= Weakley	< J. effusus L. sensu FNA	< J. effusus L. sensu RAB	Juncaceae	Mono	Rare	RWT			JBT
Weakley (2012)		Juncus elliottii Chapm.	= Weakley	= FNA	= RAB	Juncaceae	Mono	Occasional	RWT
Weakley (2012)		Juncus marginatus Rostk.	= Weakley	< J. marginatus Rostk. sensu FNA	= RAB	Juncaceae	Mono	Infrequent	RWT				Wil
Weakley (2012)		Juncus megacephalus M.A. Curtis	= Weakley	= FNA	= RAB	Juncaceae	Mono	Occasional	RWT			JBT	Wil
Weakley (2012)		Juncus pelocarpus E. Mey.	= Weakley	= FNA	> J. abortivus Chapm. sensu RAB	Juncaceae	Mono	Infrequent	RWT				Wil
Weakley (2012)		Juncus polycephalos Michx.	= Weakley	= J. polycephalus Michx. sensu FNA	= J. polycephalus Michx. sensu RAB	Juncaceae	Mono	Frequent	RWT			JBT	Wil
Weakley (2012)		Juncus repens Michx.	= Weakley	= FNA	= RAB	Juncaceae	Mono	Infrequent	RWT			JBT
Weakley (2012)		Juncus scirpoides Lam. var. compositus R.M. Harper	= Weakley	< J. scirpoides Lam. sensu FNA	< J. scirpoides Lam. sensu RAB	Juncaceae	Mono	Infrequent	RWT
Weakley (2012)		Juncus scirpoides Lam. var. scirpoides	= Weakley	< J. scirpoides Lam. sensu FNA	< J. scirpoides Lam. sensu RAB	Juncaceae	Mono	Occasional	RWT			JBT
Weakley (2012)		Juncus trigonocarpus Steud.	= Weakley	= FNA	= RAB	Juncaceae	Mono	Infrequent	RWT
Weakley (2012)		Juncus validus Coville var. validus	= Weakley	= FNA	< J. validus Covile sensu RAB	Juncaceae	Mono	Occasional	RWT				Wil
Weakley (2012)		Lilium catesbaei Walter	= Weakley	= FNA	> L. catesbaei L. var. catesbaei, L. catesbaei var. longii Fernald sensu RAB	Liliaceae	Mono	Occasional	RWT			JBT
Weakley (2012)		Amianthium muscitoxicum (Walter) A. Gray	= Weakley	= FNA	= A. muscaetoxicum (Walter) A. Gray sensu RAB	Melanthiaceae	Mono	Rare	RWT
Weakley (2012)		Stenanthium densum (Desr.) Zomlefer & Judd	= Weakley	< Zigadenus densus (Desr.) Fernald sensu FNA		Melanthiaceae	Mono	Frequent	RWT			JBT	Wil	Levy
Weakley (2012)		Veratrum virginicum (L.) W.T. Aiton	= Weakley	= Melanthium virginicum L. sensu FNA	= Melanthium virginicum L. sensu RAB	Melanthiaceae	Mono	Infrequent	RWT			JBT	Wil
Weakley (2012)		Zigadenus glaberrimus Michx.	= Weakley	= FNA	= RAB	Melanthiaceae	Mono	Frequent	RWT			JBT	Wil				Wil
Weakley (2012)		Aletris aurea Walter	= Weakley	= FNA	= RAB	Nartheciaceae	Mono	Occasional	RWT			JBT	Wil
Weakley (2012)		Aletris farinosa L.	= Weakley	= FNA	= RAB	Nartheciaceae	Mono	Frequent	RWT			JBT	Wil						W5B	S5	G5
Weakley (2012)		Aletris lutea Small	= Weakley	= FNA		Nartheciaceae	Mono	Rare	RWT
Weakley (2012)		Calopogon barbatus (Walter) Ames	= Weakley	= FNA	= RAB	Orchidaceae	Mono	Occasional	RWT			JBT
Weakley (2012)		Calopogon pallidus Chapm.	= Weakley	= FNA	= RAB	Orchidaceae	Mono	Occasional	RWT			JBT
Weakley (2012)		Calopogon tuberosus (L.) Britton, Sterns & Poggenb. var. tuberosus	= Weakley	= FNA	= C. pulchellus R. Br. sensu RAB	Orchidaceae	Mono	Infrequent	RWT			JBT
Weakley (2012)		Cleistesiopsis divaricata (L.) Pansarin & F. Barros	= Weakley	< Cleistes divaricata (L.) Ames sensu FNA	< Cleistes divaricata (L.) Ames sensu RAB	Orchidaceae	Mono	Infrequent	RWT			JBT							W1	S3	G4
Weakley (2012)		Cleistesiopsis oricamporum P.M. Br.	= Weakley	< Cleistes bifaria (Fernald) Catling & Gregg sensu FNA	< Cleistes divaricata (L.) Ames sensu RAB	Orchidaceae	Mono				RJL					RJL (CMPS)			W7	S2	G3?
Weakley (2012)		Platanthera blephariglottis (Willd.) Lindl.	= Weakley	= P. blephariglottis (Willd.) Lindl. var. blephariglottis sensu FNA	< Habenaria blephariglottis (Willd.) Hook. var. blephariglottis sensu RAB	Orchidaceae	Mono	Rare	RWT			JBT					Wil
Weakley (2012)		Platanthera ciliaris (L.) Lindl.	= Weakley	= FNA	= Habenaria ciliaris (L.) R. Br. sensu RAB	Orchidaceae	Mono				RJL	JBT				Neck
Weakley (2012)		Platanthera cristata (Michx.) Lindl.	= Weakley	= FNA	= Habenaria cristata (Michx.) R. Br. sensu RAB	Orchidaceae	Mono	Rare	RWT			JBT					Wil
Weakley (2012)		Platanthera integra (Nutt.) A. Gray ex L.C. Beck	= Weakley	= FNA	= Habenaria integra (Nutt.) Spreng. sensu RAB	Orchidaceae	Mono				RJL						Wil		T	S2	G3G4
Weakley (2012)		Platanthera nivea (Nutt.) Luer	= Weakley	= FNA	= Habenaria nivea (Nutt.) Spreng. sensu RAB	Orchidaceae	Mono									Neck			T	S1	G5
Weakley (2012)		Pogonia ophioglossoides (L.) Ker Gawl.	= Weakley	= FNA	= RAB	Orchidaceae	Mono	Rare	RWT			JBT
Weakley (2012)		Spiranthes cernua (L.) Rich.	= Weakley	= FNA	= S. cernua (L.) Rich. var. cernua sensu RAB	Orchidaceae	Mono	Occasional	RWT			JBT
Weakley (2012)		Spiranthes eatonii Ames ex P.M. Br.	= Weakley	= FNA		Orchidaceae	Mono	Infrequent	RWT										SR-L	S2	G2G4
Weakley (2012)		Spiranthes lacera (Raf.) Raf. var. gracilis (Bigelow) Luer	= Weakley	= FNA	= S. gracilis (Bigelow) Beck var. gracilis sensu RAB	Orchidaceae	Mono					JBT
Weakley (2012)		Spiranthes laciniata (Small) Ames	= Weakley	= FNA	= RAB	Orchidaceae	Mono	Infrequent	RWT			JBT							SR-P	S2	G4G5
Weakley (2012)		Spiranthes longilabris Lindl.	= Weakley	= FNA	= RAB	Orchidaceae	Mono									NHP			T	S1	G3
Weakley (2012)		Spiranthes praecox (Walter) S. Watson	= Weakley	< S. praecox (Walter) S. Watson sensu FNA	< S. praecox (Walter) S. Watson sensu RAB	Orchidaceae	Mono	Rare	RWT			JBT
Weakley (2012)		Spiranthes vernalis Engelm. & A. Gray	= Weakley	= FNA	= RAB	Orchidaceae	Dico	Infrequent	RWT
Weakley (2012)		Agrostis altissima (Walter) Tuck.	= Weakley	< A. perennans (Walter) Tuck. sensu FNA	< A. perennans (Walter) Tuck. sensu RAB	Poaceae	Mono	Occasional	RWT			JBT		RJL					SR-T	S2	G4
Weakley (2012)		Agrostis hyemalis (Walter) Britton, Sterns, & Poggenb.	= Weakley	= FNA	< A. hyemalis (Walter) Britton, Stern, & Poggenb. sensu RAB	Poaceae	Mono	Occasional	RWT				Wil
Weakley (2012)		Agrostis perennans (Walter) Tuck.	= Weakley	< A. perennans (Walter) Tuck. sensu FNA	< A. perennans (Walter) Tuck. sensu RAB	Poaceae	Mono	Infrequent	RWT
Weakley (2012)		Amphicarpum amphicarpon (Pursh) Nash	= Weakley	= FNA	= A. purshii Kunth sensu RAB	Poaceae	Mono	Occasional	RWT			JBT							W1	S3	G4
Weakley (2012)		Andropogon dealbatus (C. Mohr ex Hack.) Weakley & LeBlond	= Weakley	< A. virginicus L. var. glaucus Hack. sensu FNA	< A. virginicus L. sensu RAB	Poaceae	Mono	Occasional	RWT			JBT
Weakley (2012)		Andropogon gerardii Vitman	= Weakley	= FNA	= RAB	Poaceae	Mono	Occasional	RWT			JBT	Wil
Weakley (2012)		Andropogon glaucopsis Steud.	= Weakley	= A. glomeratus var. glaucopsis (Elliott) C. Mohr sensu FNA	< A. virginicus L. sensu RAB	Poaceae	Mono	Occasional	RWT			JBT
Weakley (2012)		Andropogon glomeratus (Walter) Britton, Sterns, & Poggenb. var. glomeratus	= Weakley	= FNA	< A. virginicus L. sensu RAB	Poaceae	Mono	Frequent	RWT			JBT
Weakley (2012)		Andropogon glomeratus (Walter) Britton, Sterns, & Poggenb. var. hirsutior (Hack.) C. Mohr	= Weakley	= FNA	< A. virginicus L. sensu RAB	Poaceae	Mono	Occasional	RWT
Weakley (2012)		Andropogon mohrii (Hack.) Hack. ex Vasey	= Weakley	= A. liebmannii Hack. var. pungensis (Ashe) C.S. Campb. sensu FNA	= RAB	Poaceae	Mono					JBT							SR-P	S2	G4?
Weakley (2012)		Andropogon perangustatus Nash	= Weakley	= A. gyrans Ashe var. stenophyllus (Hack.) C.S. Campb. sensu FNA		Poaceae	Mono	Infrequent	RWT							JBT			W1	S2S3	G4
Weakley (2012)		Andropogon tenuispatheus (Nash) Nash	= Weakley	= A. glomeratus (Walter) Britton, Sterns, & Poggenb. var. pumilus (Vasey) Vasey ex L.H. Dewey sensu FNA	< A. virginicus L. sensu RAB	Poaceae	Mono	Infrequent	RWT				Wil
Weakley (2012)		Andropogon virginicus L. var. decipiens C.S. Campb.	= Weakley	= FNA	< A. virginicus L. sensu RAB	Poaceae	Mono	Occasional	RWT										W7	S1S2	G5T4
Weakley (2012)		Andropogon virginicus L. var. virginicus [<	= Weakley	= FNA	< A. virginicus L. sensu RAB	Poaceae	Mono	Occasional	RWT			JBT
Weakley (2012)		Anthenantia rufa (Elliott) Schult.	= Weakley	= FNA	= Anthaenantia rufa (Elliott) Schult. sensu RAB	Poaceae	Mono	Frequent	RWT			JBT							W1	S2	G5
Weakley (2012)		Aristida palustris (Chapm.) Vasey	= Weakley	= FNA	= A. affinis (Schult.) Kunth sensu RAB	Poaceae	Mono	Occasional	RWT					RJL
Weakley (2012)		Aristida simpliciflora Chapm.	= Weakley	= FNA		Poaceae	Mono	Rare	RWT					RJL					SR-T	S1S2	G3G4
Weakley (2012)		Aristida stricta Michx.	= Weakley	< A. stricta Michx. sensu FNA	< A. stricta Michx. sensu RAB	Poaceae	Mono	Abundant	RWT			JBT					Wil
Weakley (2012)		Aristida virgata Trin.	= Weakley	= A. purpurascens Poir. var. virgata (Trin.) Allred sensu FNA	= RAB	Poaceae	Mono	Frequent	RWT			JBT
Weakley (2012)		Arundinaria gigantea (Walter) Muhl.	= Weakley	= FNA	< RAB	Poaceae	Mono					JBT
Weakley (2012)		Arundinaria tecta (Walter) Muhl.	= Weakley	= FNA	< A. gigantea (Walter) Muhl. sensu RAB	Poaceae	Mono	Frequent	RWT			JBT
Weakley (2012)		Calamagrostis coarctata Eaton	= Weakley	= C. cinnoides (Muhl.) W.P.C. Barton sensu FNA	= C. cinnoides (Muhl.) W.P.C. Barton sensu RAB	Poaceae	Mono	Occasional	RWT			JBT		RJL
Weakley (2012)		Calamovilfa brevipilis (Torr.) Hack. ex Scribn. & Southw.	= Weakley	= FNA	= RAB	Poaceae	Mono	Occasional	RWT								Wil		W1	S3	G4
Weakley (2012)		Chasmanthium laxum (L.) Yates	= Weakley	= FNA	= Uniola laxa (L.) Britton, Sterns, & Poggenb. sensu RAB	Poaceae	Mono	Occasional	RWT			JBT
Weakley (2012)		Coelorachis rugosa (Nutt.) Nash	= Weakley	= FNA	= Manisuris rugosa (Nutt.) Kuntze sensu RAB	Poaceae	Mono	Occasional	RWT			JBT	Wil						W1	S3	G5
Weakley (2012)		Coleataenia anceps (Michx.) Soreng ssp. anceps	= Weakley	= Panicum anceps Michx. ssp. anceps sensu FNA	= Panicum anceps Michx. var. anceps sensu RAB	Poaceae	Mono	Occasional	RWT			JBT
Weakley (2012)		Coleataenia anceps (Michx.) Soreng ssp. rhizomata (Hitchc. & Chase) Soreng	= Weakley	= Panicum anceps Michx. ssp. rhizomatum (Hitchc. & Chase) Freckmann & Lelong sensu FNA	= Panicum anceps Michx. var. rhizomatum (Hitchc. & Chase) Fernald sensu RAB	Poaceae	Mono	Occasional	RWT
Weakley (2012)		Coleataenia longifolia (Torr.) Soreng ssp. combsii (Scribn. & C.R. Ball) Soreng	= Weakley	= Panicum rigidulum Bosc ex Nees subsp. combsii (Scribn. & C.R. Ball) Freckmann & Lelong sensu FNA	= Panicum longifolium Torr. var. combsii (Scribn. & C.R. Ball) Fernald sensu RAB	Poaceae	Mono	Occasional	RWT
Weakley (2012)		Coleataenia longifolia (Torr.) Soreng ssp. longifolia	= Weakley	= Panicum rigidulum Bosc ex Nees subsp. pubescens (Vasey) Freckmann & Lelong sensu FNA	= Panicum longifolium Torr. var. longifolium sensu RAB	Poaceae	Mono	Frequent	RWT			JBT
Weakley (2012)		Ctenium aromaticum (Walter) Alph. Wood	= Weakley	= FNA	= RAB	Poaceae	Mono	Abundant	RWT			JBT	Wil	Ah	Levy		Wil
Weakley (2012)		Danthonia sericea Nutt.	= Weakley	< FNA	= D. sericea Nutt. var. sericea sensu RAB	Poaceae	Mono	Infrequent	RWT								Wil
Weakley (2012)		Dichanthelium acuminatum (Sw.) Gould & C.A. Clark var. acuminatum	= Weakley	= D. acuminatum (Sw.) Gould & C.A. Clark var. acuminatum sensu FNA	< Panicum lanuginosum Elliott sensu RAB	Poaceae	Mono					JBT
Weakley (2012)		Dichanthelium acuminatum (Sw.) Gould & C.A. Clark var. fasciculatum (Torr.) Freckmann	= Weakley	= D. acuminatum (Sw.) Gould & C.A. Clark ssp. fasciculatum (Torr.) Freckmann & Lelong sensu FNA	< Panicum lanuginosum Elliott sensu RAB	Poaceae	Mono	Infrequent	RWT				Wil
Weakley (2012)		Dichanthelium acuminatum (Sw.) Gould & C.A. Clark var. lindheimeri (Nash) Gould & C.A. Clark	= Weakley	= D. acuminatum (Sw.) Gould & C.A. Clark ssp. lindheimeri (Nash) Freckmann & Lelong sensu FNA	< Panicum lanuginosum Elliott sensu RAB	Poaceae	Mono				RJL
Weakley (2012)		Dichanthelium caerulescens (Hack. ex Hitchc.) Correll	= Weakley	< D. dichotomum (L.) Gould ssp. roanokense (Ashe) Freckmann & Lelong sensu FNA	< Panicum dichotomum L. sensu RAB	Poaceae	Mono	Rare	RWT	RJL									E	S1S2	G2G3
Weakley (2012)		Dichanthelium chamaelonche (Trin.) Freckmann & Lelong ssp. chamaelonche	= Weakley	< D. chamaelonche (Trin.) Freckmann & Lelong ssp. chamaelonche sensu FNA	< Panicum chamaelonche Trin. sensu RAB	Poaceae	Mono	Infrequent	RWT
Weakley (2012)		Dichanthelium commutatum (Schult.) Gould var. commutatum	= Weakley	> D. commutatum (Schult.) Gould ssp. commutatum, D. commutatum (Schult.) Gould ssp. equilaterale (Scribn.) Freckmann & Lelong sensu FNA	< Panicum commutatum Schult. sensu RAB	Poaceae	Mono	Rare	RWT
Weakley (2012)		Dichanthelium consanguineum (Kunth) Gould & C.A. Clark	= Weakley	= FNA	Panicum consanguineum Kunth sensu RAB	Poaceae	Mono	Occasional	RWT
Weakley (2012)		Dichanthelium dichotomum (L.) Gould var. dichotomum	= Weakley	= D. dichotomum (L.) Gould ssp. dichotomum sensu FNA	< Panicum dichotomum L. sensu RAB	Poaceae	Mono									RJL (CMPS)
Weakley (2012)		Dichanthelium dichotomum (L.) Gould var. nitidum (Lam.) LeBlond	= Weakley	= D. dichotomum (L.) Gould ssp. nitidum (Lam.) Freckmann & Lelong sensu FNA	< Panicum dichotomum L. sensu RAB	Poaceae	Mono	Infrequent	RWT
Weakley (2012)		Dichanthelium dichotomum (L.) Gould var. roanokense (Ashe) LeBlond	= Weakley	< D. dichotomum (L.) Gould ssp. roanokense (Ashe) Freckmann & Lelong sensu FNA	< Panicum dichotomum L. sensu RAB	Poaceae	Mono	Occasional	RWT			JBT		Sor					W1	S2	G5T4?
Weakley (2012)		Dichanthelium ensifolium (Baldwin ex Elliott) Gould	= Weakley	= D. ensifolium (Baldwin ex Elliott) Gould ssp. ensifolium sensu FNA	< Panicum ensifolium Baldwin ex Elliott sensu RAB	Poaceae	Mono	Frequent	RWT							JBT
Weakley (2012)		Dichanthelium leucothrix (Nash) Freckmann	= Weakley	= D. acuminatum (Sw.) Gould & C.A. Clark ssp. leucothrix (Nash) Freckmann & Lelong sensu FNA	= Panicum leucothrix Nash sensu RAB	Poaceae	Mono	Frequent	RWT
Weakley (2012)		Dichanthelium longiligulatum (Nash) Freckmann	= Weakley	= D. acuminatum (Sw.) Gould & C.A. Clark ssp. longiligulatum (Nash) Freckmann & Lelong sensu FNA	= Panicum longiligulatum Nash sensu RAB	Poaceae	Mono	Occasional	RWT			JBT
Weakley (2012)		Dichanthelium mattamuskeetense (Ashe) Mohlenbr.	= Weakley	< D. dichotomum (L.) Gould ssp. mattamuskeetense (Nash) Freckmann & Lelong sensu FNA	< Panicum dichotomum L. sensu RAB	Poaceae	Mono	Occasional	RWT							JBT
Weakley (2012)		Dichanthelium ovale (Elliott) Gould & C.A. Clark var. addisonii (Nash) Gould & C.A. Clark	= Weakley	= D. ovale (Elliott) Gould & C.A. Clark ssp. pseudopubescens (Nash) Freckmann & Lelong sensu FNA	= Panicum commonsianum Ashe sensu RAB	Poaceae	Mono									Neck
Weakley (2012)		Dichanthelium ovale (Elliott) Gould & C.A. Clark var. ovale	= Weakley	= D. ovale (Elliott) Gould & C.A. Clark ssp. ovale sensu FNA	= Panicum ovale Elliott sensu RAB	Poaceae	Mono	Rare	RWT			JBT							W1	S2S3	G5T5
Weakley (2012)		Dichanthelium scabriusculum (Elliott) Gould & C.A. Clark	= Weakley	< D. scabriusculum (Elliott) Gould & C.A. Clark sensu FNA	< Panicum scabriusculum Elliott sensu RAB	Poaceae	Mono	Frequent	RWT			JBT
Weakley (2012)		Dichanthelium scoparium (Lam.) Gould	= Weakley	= FNA	= Panicum scoparium Lam. sensu RAB	Poaceae	Mono	Occasional	RWT				Wil
Weakley (2012)		Dichanthelium species 12 (= chrysopsidifolium)	= Weakley	< D. consanguineum (Kunth) Gould & C.A. Clark sensu FNA	< Panicum consanguineum Kunth sensu RAB	Poaceae	Mono					JBT
Weakley (2012)		Dichanthelium species 3 (= lancearium)	= Weakley	< D. portoricense (Desv. ex Ham.) B.F. Hansen & Wunderlin spp. patulum (Scribn. & Merr.) Freckmann & Lelong sensu FNA	= Panicum lancearium Trin. sensu RAB	Poaceae	Mono	Occasional	RWT				Wil
Weakley (2012)		Dichanthelium sphaerocarpon (Elliott) Gould	= Weakley	= FNA	= Panicum sphaerocarpon Elliott sensu RAB	Poaceae	Mono	Infrequent	RWT			JBT	Wil	RJL
Weakley (2012)		Dichanthelium strigosum (Muhl. ex Elliott) Freckmann var. leucoblepharis (Trin.) Freckmann	= Weakley	= D. strigosum (Muhl. ex Elliott) Freckmann ssp. leucoblepharis (Trin.) Freckmann & Lelong sensu FNA	= Panicum ciliatum Elliott sensu RAB	Poaceae	Mono				RJL					Neck
Weakley (2012)		Dichanthelium strigosum (Muhl. ex Elliott) Freckmann var. strigosum	= Weakley	= D. strigosum (Muhl. ex Elliott) Freckmann ssp. strigosum sensu FNA	< Panicum strigosum Muhl. ex Elliott sensu RAB	Poaceae	Mono	Infrequent	RWT
Weakley (2012)		Dichanthelium tenue (Muhl.) Freckmann & Lelong	= Weakley	= FNA	= Panicum tenue Muhl. sensu RAB	Poaceae	Mono	Occasional	RWT
Weakley (2012)		Dichanthelium villosissimum (Nash) Freckmann var. villosissimum	= Weakley	= D. ovale (Elliott) Gould & C.A. Clark subsp. villosissimum (Nash) Freckmann & Lelong sensu FNA	= Panicum villosissimum Nash sensu RAB	Poaceae	Mono	Infrequent	RWT
Weakley (2012)		Dichanthelium webberianum (Nash) LeBlond	= Weakley	< D. portoricense (Desv. ex Ham.) B.F. Hansen & Wunderlin spp. patulum (Scribn. & Merr.) Freckmann & Lelong sensu FNA	= Panicum webberianum Nash sensu RAB	Poaceae	Mono	Occasional	RWT
Weakley (2012)		Dichanthelium wrightianum (Scribn.) Freckmann	= Weakley	= FNA	= Panicum wrightianum Scribn. sensu RAB	Poaceae	Mono	Infrequent	RWT
Weakley (2012)		Eragrostis elliottii S. Watson	= Weakley	= FNA	= RAB	Poaceae	Mono	Infrequent	RWT			JBT
Weakley (2012)		Eragrostis refracta (Muhl. ex Elliott) Scribn.	= Weakley	= FNA	= RAB	Poaceae	Mono	Frequent	RWT			JBT
Weakley (2012)		Gymnopogon brevifolius Trin.	= Weakley	= FNA	= RAB	Poaceae	Mono	Infrequent	RWT							JBT
Weakley (2012)		Muhlenbergia capillaris (Lam.) Trin.	= Weakley	= FNA	< RAB	Poaceae	Mono	Rare	RWT
Weakley (2012)		Muhlenbergia expansa (Poir.) Trin.	= Weakley	= FNA	= RAB	Poaceae	Mono	Abundant	RWT			JBT	Wil
Weakley (2012)		Muhlenbergia torreyana (Schult.) Hitchc.	= Weakley	= FNA		Poaceae	Mono	Rare	RWT	Sor, RJL									SC-V	S2	G3
Weakley (2012)		Panicum dichotomiflorum Michx. var. puritanorum Svenson	= Weakley	= P. dichotomiflorum Michx. subsp. puritanorum (Svenson) Freckmann & Lelong sensu FNA		Poaceae	Mono	Rare	RWT										SR-P	S1	G5T4
Weakley (2012)		Panicum hemitomon Schult.	= Weakley	= FNA	= RAB	Poaceae	Mono					JBT
Weakley (2012)		Panicum verrucosum Muhl.	= Weakley	= FNA	= RAB	Poaceae	Mono	Occasional	RWT			JBT
FNA		Panicum virgatum L.	> P. virgatum L. various varieties sensu Weakley	= FNA	= RAB	Poaceae	Mono	Occasional	RWT			JBT	Wil
Weakley (2012)		Paspalum floridanum Michx.	= Weakley	= FNA	= RAB	Poaceae	Mono						Wil
Weakley (2012)		Paspalum praecox Walter var. curtisianum (Steud.) Vasey	= Weakley	< P. praecox Walter sensu FNA	= RAB	Poaceae	Mono	Occasional	RWT										W1	S2S3	G4		(status and ranks for P. praecox)
Weakley (2012)		Paspalum praecox Walter var. praecox	= Weakley	< P. praecox Walter sensu FNA	= RAB	Poaceae	Mono	Infrequent	RWT			JBT							W1	S2S3	G4		(status and ranks for P. praecox)
Weakley (2012)		Paspalum setaceum Michx. var. ciliatifolium (Michx.) Vasey	= Weakley	= FNA	< P. setaceum Michx. sensu RAB	Poaceae	Mono					JBT
Weakley (2012)		Paspalum setaceum Michx. var. muhlenbergii (Nash) D.J. Banks	= Weakley	= FNA	< P. setaceum Michx. sensu RAB	Poaceae	Mono	Infrequent	RWT
Weakley (2012)		Paspalum setaceum Michx. var. setaceum	= Weakley	= FNA	< P. setaceum Michx. sensu RAB	Poaceae	Mono	Occasional	RWT
Weakley (2012)		Saccharum baldwinii Spreng.	= Weakley	= FNA	= Erianthus strictus Baldwin sensu RAB	Poaceae	Mono	Infrequent	RWT
Weakley (2012)		Saccharum brevibarbe (Michx.) Pers. var. contortum (Elliott) R.D. Webster	= Weakley	= FNA	= Erianthus contortus Elliott sensu RAB	Poaceae	Mono					JBT
Weakley (2012)		Saccharum coarctatum (Fernald) R.D. Webster	= Weakley	= FNA	< Erianthus brevibarbis Michx. sensu RAB	Poaceae	Mono	Occasional	RWT
Weakley (2012)		Saccharum giganteum (Walter) Pers.	= Weakley	= FNA	= Erianthus giganteus (Walter) P. Beauv. sensu RAB	Poaceae	Mono	Occasional	RWT			JBT	Wil
Weakley (2012)		Schizachyrium scoparium (Michx.) Nash var. scoparium	= Weakley	= FNA	< Andropogon scoparius Michx. sensu RAB	Poaceae	Mono	Frequent	RWT			JBT					Wil
Weakley (2012)		Setaria parviflora (Poir.) Kerguélen	= Weakley	= FNA	= S. geniculata P. Beauv. sensu RAB	Poaceae	Mono	Infrequent	RWT			JBT
Weakley (2012)		Sorghastrum nutans (L.) Nash	= Weakley	= FNA	= RAB	Poaceae	Mono	Infrequent	RWT			JBT	Wil
Weakley (2012)		Sporobolus pinetorum Weakley & P.M. Peterson	= Weakley	= FNA	>< S. teretifolius R.M. Harper sensu RAB	Poaceae	Mono	Abundant	RWT			JBT		Sor			Wil		W1	S3	G3
Weakley (2012)		Smilax bona-nox L.	= Weakley	= FNA	= RAB	Smilacaceae	Mono	Rare	RWT			JBT
Weakley (2012)		Smilax glauca Walter	= Weakley	= FNA	= RAB	Smilacaceae	Mono	Occasional	RWT			JBT
Weakley (2012)		Smilax laurifolia L.	= Weakley	= FNA	= RAB	Smilacaceae	Mono	Frequent	RWT			JBT
Weakley (2012)		Smilax rotundifolia L.	= Weakley	= FNA	= RAB	Smilacaceae	Mono	Infrequent	RWT			JBT
Weakley (2012)		Smilax smallii Morong	= Weakley	= FNA	= RAB	Smilacaceae	Mono	Occasional	RWT
Weakley (2012)		Pleea tenuifolia Michx.	= Weakley	= FNA	= RAB	Tofieldiaceae	Mono	Frequent	RWT			JBT	Wil
Weakley (2012)		Tofieldia glabra Nutt.	= Weakley	= FNA	= RAB	Tofieldiaceae	Mono	Infrequent	RWT			JBT	Wil
Weakley (2012)		Triantha racemosa (Walter) Small	= Weakley	= FNA	= Tofieldia racemosa (Walter) Britton, Sterns & Poggenb. var. racemosa RAB	Tofieldiaceae	Mono	Occasional	RWT			JBT	Wil	Wyland
Weakley (2012)		Trillium pusillum Michx. var. pusillum	= Weakley	< FNA	< T. pusillum Michx. sensu RAB	Trilliaceae	Mono									Neck		FSC	E	S2	G3T2
Weakley (2012)		Xyris ambigua Beyr. ex Kunth	= Weakley	= FNA	= RAB	Xyridaceae	Mono	Frequent	RWT			JBT
Weakley (2012)		Xyris baldwiniana Schult.	= Weakley	= FNA	= RAB	Xyridaceae	Mono	Rare	RWT			JBT
Weakley (2012)		Xyris brevifolia Michx.	= Weakley	= FNA	= RAB	Xyridaceae	Mono	Infrequent	RWT			JBT							W1	S3	G4G5
Weakley (2012)		Xyris caroliniana Walter	= Weakley	= FNA	= RAB	Xyridaceae	Mono	Occasional	RWT			JBT
Weakley (2012)		Xyris curtissii Malme	= Weakley	= X. difformis Malme var. curtissii (Malme) Kral sensu FNA	= RAB	Xyridaceae	Mono	Occasional	RWT			JBT
Weakley (2012)		Xyris fimbriata Elliott	= Weakley	= FNA	= RAB	Xyridaceae	Mono	Infrequent	RWT
Weakley (2012)		Xyris flabelliformis Chapm.	= Weakley	= FNA	= RAB	Xyridaceae	Mono									RJL			W1	S1	G4
Weakley (2012)		Xyris floridana (Kral) E.L. Bridges & Orzell	= Weakley	= X. difformis Chapm. var. floridana Kral sensu FNA		Xyridaceae	Mono									RJL			SR-P	S1	G5T4T5
Weakley (2012)		Xyris iridifolia Chapm.	= Weakley	= X. laxifolia Mart. var. iridifolia (Chapm.) Kral sensu FNA	=	Xyridaceae	Mono					JBT							W7	S2	G4G5T4T5
Weakley (2012)		Xyris jupicai Rich.	= Weakley	= FNA	= RAB	Xyridaceae	Mono				RJL
Weakley (2012)		Xyris scabrifolia R.M. Harper	= Weakley	< FNA		Xyridaceae	Mono							McMillan				FSC	SR-T	S2	G3
Weakley (2012)		Xyris species 1	= Weakley	< X. difformis Malme var. curtissii (Malme) Kral sensu FNA	< X. curtissii Malme sensu RAB	Xyridaceae	Mono	Rare	RWT			JBT							W2	S2	G2
Weakley (2012)		Viburnum nudum L.	= Weakley		= RAB	Adoxaceae	Dico	Infrequent	RWT			JBT
Weakley (2012)		Liquidambar styraciflua L.	= Weakley	= FNA	= RAB	Altingiaceae	Dico	Occasional	RWT			JBT	Wil
Weakley (2012)		Rhus copallinum L. var. copallinum	= Weakley		< R. copallina L. sensu RAB	Anacardiaceae	Dico	Infrequent	RWT			JBT		Levy
Weakley (2012)		Toxicodendron radicans (L.) Kuntze var. radicans	= Weakley		< Rhus radicans L. sensu RAB	Anacardiaceae	Dico	Infrequent	RWT			JBT
Weakley (2011)		Centella erecta (L. f.) Fernald	= Weakley (2011)		< C. asiatica (L.) Urb. sensu RAB	Apiaceae	Dico	Frequent	RWT			JBT
Weakley (2012)		Eryngium aquaticum L. var. aquaticum	= Weakley		= RAB	Apiaceae	Dico	Rare	RWT			JBT
Weakley (2012)		Eryngium aquaticum L. var. ravenelii (A. Gray) Mathias & Constance	= Weakley		= RAB	Apiaceae	Dico					JBT	Wil	RJL					SR-P	S1	G4T2T4Q
Weakley (2012)		Eryngium integrifolium Walter	= Weakley		= RAB	Apiaceae	Dico	Occasional	RWT			JBT	Wil
Weakley (2012)		Eryngium yuccifolium Michx. var. synchaetum A. Gray ex J.M. Coult. & Rose	= Weakley		= RAB	Apiaceae	Dico	Infrequent	RWT			JBT	Wil	Levy					W2	S2	G5T5
Weakley (2012)		Eryngium yuccifolium Michx. var. yuccifolium	= Weakley		= RAB	Apiaceae	Dico	Infrequent	RWT			JBT
Weakley (2012)		Oxypolis rigidior (L.) Raf.	= Weakley		= RAB	Apiaceae	Dico	Rare	RWT			JBT
Weakley (2012)		Oxypolis ternata (Nutt.) A. Heller	= Weakley		= RAB	Apiaceae	Dico	Rare	RWT			JBT
Weakley (2012)		Ptilimnium capillaceum (Michx.) Raf.	= Weakley		= RAB	Apiaceae	Dico	Rare	RWT			JBT
Weakley (2012)		Tiedemannia filiformis (Walter) Feist & S.R. Downie ssp. filiformis	= Weakley		= Oxypolis filiformis (Walter) Britton sensu RAB	Apiaceae	Dico	Occasional	RWT			JBT
Weakley (2012)		Asclepias lanceolata Walter	= Weakley		= RAB	Apocynaceae	Dico	Infrequent	RWT			JBT	Wil
Weakley (2012)		Asclepias longifolia Michx.	= Weakley		= RAB	Apocynaceae	Dico	Infrequent	RWT			JBT							W1	S2S3	G4G5
Weakley (2012)		Asclepias pedicellata Walter	= Weakley		= RAB	Apocynaceae	Dico	Rare	RWT										SR-P	S3	G4
Weakley (2012)		Asclepias rubra L.	= Weakley		= RAB	Apocynaceae	Dico					JBT	Wil
Weakley (2012)		Ilex coriacea (Pursh) Chapm.	= Weakley		= RAB	Aquifoliaceae	Dico	Frequent	RWT			JBT	Wil
Weakley (2012)		Ilex glabra (L.) A. Gray	= Weakley		= RAB	Aquifoliaceae	Dico	Abundant	RWT			JBT	Wil
Weakley (2012)		Ilex myrtifolia Walter	= Weakley		= I. cassine L. var. myrtifolia (Walter) Sarg. Sensu RAB	Aquifoliaceae	Dico	Occasional	RWT			JBT
Weakley (2012)		Ilex opaca Aiton var. opaca	= Weakley		< I. opaca Aiton sensu RAB	Aquifoliaceae	Dico	Rare	RWT			JBT
Weakley (2012)		Aralia spinosa L.	= Weakley		= RAB	Araliaceae	Dico					JBT
Weakley (2012)		Arnica acaulis (Walter) Britton, Sterns & Poggenb.	= Weakley	= FNA	= RAB	Asteraceae	Dico									Neck
Weakley (2012)		Arnoglossum ovatum (Walter) H. Rob. var. lanceolatum (Nutt.) D.B. Ward	= Weakley	< A. ovatum (Walter) H. Rob. sensu FNA	= Cacalia lanceolata Nutt. sensu RAB	Asteraceae	Dico	Rare	RWT			JBT							SR-P	S2	G4G5
Weakley (2012)		Baccharis glomeruliflora Pers.	= Weakley	= FNA	= RAB	Asteraceae	Dico	Rare				JBT							SR-P	SH	G4
Weakley (2012)		Balduina uniflora Nutt.	= Weakley	= FNA	= RAB	Asteraceae	Dico	Occasional	RWT			JBT	Wil
Weakley (2012)		Bigelowia nudata (Michx.) DC. var. nudata	= Weakley	= FNA	< Chondrophora nudata (Michx.) Britton sensu RAB	Asteraceae	Dico	Occasional	RWT			JBT	Wil
Weakley (2012)		Carphephorus bellidifolius (Michx.) Torr. & A. Gray	= Weakley	= FNA	= RAB	Asteraceae	Dico	Rare	RWT			JBT
Weakley (2012)		Carphephorus tomentosus (Michx.) Torr. & A. Gray	= Weakley	= FNA	= RAB	Asteraceae	Dico	Occasional	RWT			JBT	Wil
Weakley (2012)		Chaptalia tomentosa Vent.	= Weakley	= FNA	= RAB	Asteraceae	Dico	Infrequent	RWT			JBT
Weakley (2012)		Chrysopsis mariana (L.) Elliott	= Weakley	= FNA	= Heterotheca mariana (L.) Shinners sensu RAB	Asteraceae	Dico					JBT
Weakley (2012)		Cirsium horridulum Michx. var. horridulum	= Weakley	= FNA	= Carduus spinosissimus Walter sensu RAB	Asteraceae	Dico	Rare	RWT			JBT
Weakley (2012)		Cirsium horridulum Michx. var. vittatum (Small) R.W. Long	= Weakley	= FNA	= Carduus smallii (Britton) H.E. Ahles sensu RAB	Asteraceae	Dico	Infrequent	RWT			JBT		RJL
Weakley (2012)		Cirsium lecontei Torr. & A. Gray	= Weakley	= FNA	= Carduus lecontei (Torr. & A. Gray) Pollard sensu RAB	Asteraceae	Dico	Rare	RWT			JBT							SR-P	S2	G2G3
Weakley (2012)		Cirsium repandum Michx.	= Weakley	= FNA	= Carduus repandus (Michx.) Pers. sensu RAB	Asteraceae	Dico					JBT
Weakley (2012)		Cirsium virginianum (L.) Michx.	= Weakley	= FNA	= Carduus virginianus L. sensu RAB	Asteraceae	Dico	Occasional	RWT			JBT	Wil
Weakley (2012)		Coreopsis falcata F.E. Boynton	= Weakley	< C. gladiata Walter sensu FNA	= RAB	Asteraceae	Dico	Occasional	RWT			JBT	Wil
Weakley (2012)		Coreopsis linifolia Nutt.	= Weakley	< C. gladiata Walter sensu FNA	= C. angustifolia Aiton sensu RAB	Asteraceae	Dico	Frequent	RWT			JBT	Wil
Weakley (2012)		Coreopsis palustris Sorrie	= Weakley	< C. gladiata Walter sensu FNA	= C. helianthoides Beadle sensu RAB	Asteraceae	Dico					JBT							SR-P	S1S2	G3G4Q
Weakley (2012)		Coreopsis species 1	= Weakley			Asteraceae	Dico	Rare	RWT			JBT		RJL					SR-L	S1	G1?
Weakley (2012)		Elephantopus nudatus A. Gray	= Weakley	= FNA	= RAB	Asteraceae	Dico	Occasional	RWT			JBT
Weakley (2012)		Erechtites hieraciifolius (L.) Raf. ex DC.	= Weakley	= E. hieraciifolius (L.) Raf. ex DC. var. hieraciifolius sensu FNA	< RAB	Asteraceae	Dico	Rare	RWT			JBT
Weakley (2012)		Erigeron vernus (L.) Torr. & A. Gray	= Weakley	= FNA	= RAB	Asteraceae	Dico	Frequent	RWT			JBT	Wil
Weakley (2012)		Eupatorium capillifolium (Lam.) Small	= Weakley	= FNA	= E. capillifolium (Lam.) Small var. capillifolium sensu RAB	Asteraceae	Dico	Rare	RWT			JBT
Weakley (2012)		Eupatorium hyssopifolium L.	= Weakley	= E. hyssopifolium L. var. hyssopifolium sensu FNA	< RAB	Asteraceae	Dico					JBT	Wil
Weakley (2012)		Eupatorium leucolepis (DC.) Torr. & A. Gray	= Weakley	< E. leucolepis (DC.) Torr. & A. Gray var. leucolepis sensu FNA	< RAB	Asteraceae	Dico	Frequent	RWT			JBT
Weakley (2012)		Eupatorium mohrii Greene	= Weakley	< FNA	< E. recurvans Small sensu RAB	Asteraceae	Dico					JBT
Weakley (2012)		Eupatorium perfoliatum L.	= Weakley	= FNA	= RAB	Asteraceae	Dico					JBT	Wil
Weakley (2012)		Eupatorium pilosum Walter	= Weakley	= FNA	= RAB	Asteraceae	Dico	Occasional	RWT			JBT	Wil
Weakley (2012)		Eupatorium recurvans Small	= Weakley	< E. mohrii Greene sensu FNA	< RAB	Asteraceae	Dico	Infrequent	RWT										W7	S1?	G3G4Q
Weakley (2012)		Eupatorium rotundifolium L.	= Weakley	= E. rotundifolium L. var. rotundifolium sensu FNA	= E. rotundifolium L. var. rotundifolium sensu RAB	Asteraceae	Dico	Rare	RWT			JBT
Weakley (2012)		Eurybia compacta G.L. Nesom	= Weakley	= FNA	= Aster gracilis Nutt. sensu RAB	Asteraceae	Dico	Infrequent	RWT			JBT
Weakley (2012)		Eurybia paludosa (Aiton) G.L. Nesom	= Weakley	= FNA	= Aster paludosus Aiton sensu RAB	Asteraceae	Dico	Frequent	RWT			JBT	Wil
Weakley (2012)		Euthamia caroliniana (L.) Greene ex Porter & Britton	= Weakley	= FNA	> Solidago microcephala (Nutt.) Bush, >< Solidago tenuifolia Pursh sensu RAB	Asteraceae	Dico	Occasional	RWT			JBT	Wil
Weakley (2012)		Helenium autumnale L.	= Weakley	= FNA	= RAB	Asteraceae	Dico	Infrequent	RWT			JBT	Wil
Weakley (2012)		Helenium pinnatifidum (Schwein. ex Nutt.) Rydb.	= Weakley	= FNA	= RAB	Asteraceae	Dico									Neck			SR-P	S2	G4
Weakley (2012)		Helianthus angustifolius L.	= Weakley	= FNA	= RAB	Asteraceae	Dico	Occasional	RWT			JBT	Wil
Weakley (2012)		Helianthus heterophyllus Nutt.	= Weakley	= FNA	= RAB	Asteraceae	Dico	Infrequent	RWT			JBT
Weakley (2012)		Hieracium gronovii L.	= Weakley	= FNA	= RAB	Asteraceae	Dico	Rare	RWT			JBT
Weakley (2012)		Ionactis linariifolia (L.) Greene	= Weakley	= FNA	= Aster linariifolius L. sensu RAB	Asteraceae	Dico	Infrequent	RWT			JBT
Weakley (2012)		Liatris pilosa (Aiton) Willd.	= Weakley	= FNA	< L. graminifolia Willd. sensu RAB	Asteraceae	Dico	Infrequent	RWT
Weakley (2012)		Liatris spicata (L.) Willd. var. resinosa (Nutt.) Gaiser	= Weakley	= FNA	= RAB	Asteraceae	Dico	Occasional	RWT			JBT
Weakley (2012)		Marshallia graminifolia (Walter) Small	= Weakley	< M. graminifolia (Walter) Small sensu FNA	= RAB	Asteraceae	Dico	Occasional	RWT			JBT
Weakley (2012)		Mikania scandens (L.) Willd.	= Weakley	= FNA	= RAB	Asteraceae	Dico	Infrequent	RWT			JBT
FNA		Packera paupercula (Michx.) Á. Löve & D. Löve	> P. crawfordii (Britton) A.M. Mahoney & R.R. Kowal, P. paupercula (Michx.) Á. Löve & D. Löve var. paupercula sensu Weakley	= FNA	= Senecio pauperculus Michx. sensu RAB	Asteraceae	Dico					JBT		RJL	Weakley				SR-T	S1	G2G3		(status and ranks for P. crawfordii)
Weakley (2012)		Pityopsis graminifolia (Michx.) Nutt. var. latifolia (Fernald) Semple & F.D. Bowers	= Weakley	= FNA	> Heterotheca nervosa (Willd.) Shinners var. nervosa (Small) Shinners ex Ahles, Heterotheca correllii (Fernald) H.E. Ahles sensu RAB	Asteraceae	Dico	Occasional	RWT			JBT
Weakley (2012)		Pluchea baccharis (Mill.) Pruski	= Weakley	= FNA	= P. rosea R.K. Godfrey sensu RAB	Asteraceae	Dico									RJL
FNA		Pluchea foetida (L.) DC.	> P. foetida var. foetida, P. foetida var. imbricata Kearney sensu Weakley	= FNA	= RAB	Asteraceae	Dico	Infrequent	RWT			JBT
Weakley (2012)		Prenanthes autumnalis Walter	= Weakley	= FNA	= RAB	Asteraceae	Dico	Rare	RWT			JBT
Weakley (2012)		Pseudognaphalium obtusifolium (L.) Hilliard & Burtt	= Weakley	= FNA	= Gnaphalium obtusifolium L. sensu RAB	Asteraceae	Dico	Infrequent	RWT			JBT
Weakley (2012)		Pterocaulon pycnostachyum (Michx.) Elliott	= Weakley	= FNA	= RAB	Asteraceae	Dico	Occasional	RWT			JBT	Wil	Levy
Weakley (2012)		Pyrrhopappus carolinianus (Walter) DC.	= Weakley	= FNA	> P. carolinianus (Walter) DC. var. carolinianus sensu RAB	Asteraceae	Dico	Occasional	RWT			JBT
Weakley (2012)		Sericocarpus linifolius (L.) Britton, Sterns & Poggenb.	= Weakley	= FNA	= Aster solidagineus Michx. sensu RAB	Asteraceae	Dico	Rare	RWT			JBT
Weakley (2012)		Silphium compositum Michx. var. compositum	= Weakley	< S. compositum Michx. sensu FNA	< S. compositum Michx. var. compositum sensu RAB	Asteraceae	Dico					JBT
Weakley (2012)		Solidago fistulosa Mill.	= Weakley	= FNA	= RAB	Asteraceae	Dico					JBT
Weakley (2012)		Solidago gracillima Torr. & A. Gray	= Weakley	= S. stricta Aiton ssp. gracillima (Torr. & A. Gray) Semple sensu FNA	= RAB	Asteraceae	Dico	Occasional	RWT										W1	S3	G4?
Weakley (2012)		Solidago odora Aiton	= Weakley	= S. odora Aiton ssp. odora sensu FNA	= RAB	Asteraceae	Dico					JBT
Weakley (2012)		Solidago pinetorum Small	= Weakley	= FNA	= RAB	Asteraceae	Dico					JBT
Weakley (2012)		Solidago puberula Nutt. var. pulverulenta (Nutt.) Chapm.	= Weakley	= S. puberula Nutt. var. pulverulenta (Nutt.) Chapm. sensu FNA	=	Asteraceae	Dico	Infrequent	RWT			JBT
Weakley (2012)		Solidago pulchra Small	= Weakley	= FNA	< S. stricta Aiton sensu RAB	Asteraceae	Dico	Frequent	RWT			JBT	Wil						W1	S3	G3
Weakley (2012)		Solidago stricta Aiton	= Weakley	= S. stricta Aiton spp. stricta sensu FNA	< RAB	Asteraceae	Dico	Infrequent	RWT			JBT
FNA		Symphyotrichum dumosum (L.) G.L. Nesom	< S. dumosum (L.) G.L. Nesom various varieties sensu Weakley	= FNA	= Aster dumosus L. sensu RAB	Asteraceae	Dico	Occasional	RWT			JBT	Wil
FNA		Symphyotrichum lateriflorum (L.) Á. Löve & D. Löve	< S. lateriflorum (L.) Á. Löve & D. Löve various varieties sensu Weakley	= FNA	< Aster lateriflorus (L.) Britton sensu RAB	Asteraceae	Dico							RJL
FNA		Symphyotrichum novi-belgii (L.) G.L. Nesom var. elodes (Torr. & A. Gray) G.L. Nesom	= Weakley	= FNA	< Aster novi-belgii L. sensu RAB	Asteraceae	Dico									RJL
FNA		Symphyotrichum pilosum (Willd.) G.L. Nesom var. pilosum	= Weakley	= FNA	< Aster pilosus Willd. sensu RAB	Asteraceae	Dico						Wil
FNA		Symphyotrichum walteri (Alexander) G.L. Nesom	= Weakley	= FNA	= Aster squarrosus Walter sensu RAB	Asteraceae	Dico	Infrequent	RWT			JBT
Weakley (2012)		Trilisa odoratissima (J.F. Gmel.) Cass.	= Weakley	= Carphephorus odoratissimus (J.F. Gmel.) H.J.-C. Hebert var. odoratissimus sensu FNA	< T. odoratissima (J.F. Gmel.) Cass. sensu RAB	Asteraceae	Dico	Frequent	RWT			JBT
Weakley (2012)		Trilisa paniculata (J.F. Gmel.) Cass.	= Weakley	= Carphephorus paniculatus (J.F. Gmel.) H.J.-C. Hebert sensu FNA	= RAB	Asteraceae	Dico	Infrequent	RWT			JBT
FNA		Vernonia angustifolia Michx.	> V. angustifolia Michx. various varieties sensu Weakley	= FNA	> V. angustifolia Michx. var. angustifolia, V. angustifolia Michx. var. scabberima (Nutt.) S.B. Jones & W.Z. Faust sensu RAB	Asteraceae	Dico									Neck
FNA		Vernonia noveboracensis (L.) Michx.	= Weakley	= FNA	= RAB	Asteraceae	Dico					JBT
Weakley (2012)		Bignonia capreolata L.	= Weakley		= Anisostichus capreolata (L.) Bureau sensu RAB	Bignoniaceae	Dico	Infrequent	RWT			JBT
Weakley (2012)		Campsis radicans (L.) Seem. ex Bureau	= Weakley		= RAB	Bignoniaceae	Dico	Infrequent	RWT			JBT
Weakley (2012)		Lobelia canbyi A. Gray	= Weakley		= RAB	Campanulaceae	Dico	Frequent	RWT			JBT
Weakley (2012)		Lobelia glandulosa Walter	= Weakley		= RAB	Campanulaceae	Dico	Occasional	RWT			JBT
Weakley (2012)		Lobelia nuttallii Schult.	= Weakley		= RAB	Campanulaceae	Dico	Frequent	RWT			JBT	Wil
Weakley (2012)		Lonicera sempervirens L.	= Weakley		= RAB	Caprifoliaceae	Dico						Wil
Weakley (2012)		Lechea minor L.	= Weakley		= RAB	Cistaceae	Dico	Rare	RWT							JBT
Weakley (2012)		Lechea pulchella Raf. var. ramosissima (Hodgdon) Sorrie & Weakley	= Weakley		< L. leggettii Britton & Hollick sensu RAB	Cistaceae	Dico	Infrequent	RWT			JBT
Weakley (2012)		Clethra alnifolia L.	= Weakley	= FNA	= C. alnifolia L. var. alnifolia sensu RAB	Clethraceae	Dico	Occasional	RWT			JBT	Wil
Weakley (2012)		Cuscuta gronovii Willd. ex Roem. & Schult.	= Weakley		= RAB	Convolvulaceae	Dico	Rare	RWT
Weakley (2012)		Cuscuta pentagona Engelm.	= Weakley		= RAB	Convolvulaceae	Dico					JBT
Weakley (2012)		Cornus stricta Lam.	= Weakley		= RAB	Cornaceae	Dico	Rare	RWT			JBT	Wil
Weakley (2012)		Cyrilla racemiflora L.	= Weakley	= FNA	= RAB	Cyrillaceae	Dico	Frequent	RWT			JBT	Wil
Weakley (2012)		Pyxidanthera barbulata Michx.	= Weakley	= FNA	= P. barbulata Michx. var. barbulata sensu RAB	Diapensiaceae	Dico	Occasional	RWT			JBT
Weakley (2012)		Dionaea muscipula J. Ellis	= Weakley		= RAB	Droseraceae	Dico	Occasional	RWT			JBT	Wil	Bell					SR-L	FSC	S3	G3
Weakley (2012)		Drosera brevifolia Pursh	= Weakley		= D. leucantha Shinners sensu RAB	Droseraceae	Dico	Abundant	RWT			JBT
Weakley (2012)		Drosera capillaris Poir.	= Weakley		= RAB	Droseraceae	Dico	Abundant	RWT			JBT
Weakley (2012)		Drosera intermedia Hayne	= Weakley		= RAB	Droseraceae	Dico	Frequent	RWT			JBT	Wil
Weakley (2012)		Diospyros virginiana L.	= Weakley	= FNA	= RAB	Ebenaceae	Dico	Frequent	RWT			JBT
Weakley (2012)		Chamaedaphne calyculata (L.) Moench	= Weakley	= FNA	= Cassandra calyculata (L.) D. Don sensu RAB	Ericaceae	Dico					JBT					Fox
Weakley (2012)		Eubotrys racemosa (L.) Nutt.	= Weakley	= FNA	= Leucothoe racemosa (L.) A. Gray sensu RAB	Ericaceae	Dico	Occasional	RWT			JBT	Wil
Weakley (2012)		Gaylussacia dumosa (Andrews) Torr. & A. Gray	= Weakley	= FNA	< RAB	Ericaceae	Dico	Abundant	RWT			JBT
Weakley (2012)		Gaylussacia frondosa (L.) Torr. & A. Gray ex Torr.	= Weakley	= FNA	= G. frondosa (L.) Torr. & A. Gray ex Torr. var. frondosa sensu RAB	Ericaceae	Dico	Abundant	RWT			JBT	Wil
Weakley (2012)		Kalmia carolina Small	= Weakley	= K. angustifolia L. var. caroliniana (Small) Fernald sensu FNA	= K. angustifolia L. var. caroliniana (Small) Fernald sensu RAB	Ericaceae	Dico	Frequent	RWT			JBT		weakley
Weakley (2012)		Leucothoe axillaris (Lam.) D. Don	= Weakley	= FNA	= L. axillaris (Lam.) D. Don var. axillaris sensu RAB	Ericaceae	Dico					JBT
Radford, Ahles, & Bell (1968)		Lyonia ligustrina (L.) DC.	> L. ligustrina var. foliosiflora (Michx.) Fernald, L. ligustrina var. ligustrina sensu Weakley	> L. ligustrina var. foliosiflora (Michx.) Fernald, L. ligustrina var. ligustrina sensu FNA	= RAB	Ericaceae	Dico	Frequent	RWT			JBT	Wil
Weakley (2012)		Lyonia lucida (Lam.) K. Koch	= Weakley	= FNA	= RAB	Ericaceae	Dico	Frequent	RWT			JBT	Wil	weakley			Fox
Weakley (2012)		Lyonia mariana (L.) D. Don	= Weakley	= FNA	= RAB	Ericaceae	Dico	Frequent	RWT			JBT	Wil
FNA		Rhododendron atlanticum (Ashe) Rehder	= Weakley	= FNA	= RAB	Ericaceae	Dico	Occasional	RWT			JBT	Wil	Levy
FNA		Rhododendron viscosum (L.) Torr.	> R. viscosum (L.) Torr. var. serrulatum (Small) Ahles, R. viscosum (L.) Torr. var. viscosum sensu Weakley	= FNA	> R. viscosum (L.) Torr. var. serrulatum (Small) Ahles, R. viscosum (L.) Torr. var. viscosum sensu RAB	Ericaceae	Dico	Occasional	RWT			JBT		RJL
Weakley (2012)		Vaccinium arboreum Marshall	= Weakley	= FNA	= RAB	Ericaceae	Dico					JBT
Weakley (2012)		Vaccinium crassifolium Andrews	= Weakley	< FNA	= RAB	Ericaceae	Dico	Abundant	RWT			JBT
Weakley (2012)		Vaccinium formosum Andrews	= Weakley	< V. corymbosum L. sensu FNA	< V. corymbosum L. sensu RAB	Ericaceae	Dico	Occasional	RWT			JBT
Weakley (2012)		Vaccinium fuscatum Aiton	= Weakley	< V. corymbosum L. sensu FNA	= V. atrococcum (Gray) A. Heller sensu RAB	Ericaceae	Dico	Frequent	RWT			JBT
FNA		Vaccinium stamineum L.	> V. stamineum L. various varieties sensu Weakley	= FNA	> V. stamineum L. var. stamineum sensu RAB	Ericaceae	Dico				RJL
Weakley (2012)		Vaccinium tenellum Aiton	= Weakley	= FNA	= RAB	Ericaceae	Dico	Frequent	RWT			JBT	Wil	Ahles			Fox
Weakley (2012)		Zenobia pulverulenta (W. Bartram ex Willd.) Pollard	= Weakley	= FNA	= RAB	Ericaceae	Dico	Frequent	RWT			JBT
Weakley (2012)		Cnidoscolus stimulosus (Michx.) Engelm. & A. Gray	= Weakley		= RAB	Euphorbiaceae	Dico	Occasional	RWT			JBT
Weakley (2012)		Euphorbia ipecacuanhae L.	= Weakley		= RAB	Euphorbiaceae	Dico	Infrequent	RWT				Wil
Weakley (2012)		Tragia urens L.	= Weakley		= RAB	Euphorbiaceae	Dico	Rare	RWT					Ahles
Weakley (2012)		Amorpha georgiana Wilbur	= Weakley		< RAB	Fabaceae	Dico	Rare	RWT									FSC	E	S2	G3T2
Weakley (2012)		Amorpha herbacea Walter var. herbacea	= Weakley		< A. herbacea Walter sensu RAB	Fabaceae	Dico	Rare	RWT				Wil
Weakley (2012)		Apios americana Medik.	= Weakley		= RAB	Fabaceae	Dico	Rare	RWT
Weakley (2012)		Baptisia cinerea (Raf.) Fernald & B.G. Schub.	= Weakley		= RAB	Fabaceae	Dico					JBT
Weakley (2012)		Baptisia tinctoria (L.) Vent.	= Weakley		= RAB	Fabaceae	Dico					JBT
Weakley (2012)		Centrosema virginianum (L.) Benth.	= Weakley		= RAB	Fabaceae	Dico	Occasional	RWT			JBT
Weakley (2012)		Chamaecrista fasciculata (Michx.) Greene var. fasciculata	= Weakley		< Cassia fasciculata Michx. sensu RAB	Fabaceae	Dico					JBT
Weakley (2012)		Chamaecrista nictitans (L.) Moench var. nictitans	= Weakley		< Cassia nictitans L. sensu RAB	Fabaceae	Dico	Infrequent	RWT			JBT
Weakley (2012)		Crotalaria purshii DC.	= Weakley		= RAB	Fabaceae	Dico									Neck
Weakley (2012)		Desmodium ciliare (Muhl. ex Willd.) DC.	= Weakley		= RAB	Fabaceae	Dico									Neck
Weakley (2012)		Desmodium lineatum (Michx.) DC.	= Weakley		= RAB	Fabaceae	Dico									Neck
Radford, Ahles, & Bell (1968)		Desmodium paniculatum (L.) DC.	> D. paniculatum (L.) DC. var. epepetiolatum B.G. Schub, D. paniculatum (L.) DC. var. paniculatum sensu Weakley		= RAB	Fabaceae	Dico									Neck
Weakley (2012)		Desmodium tenuifolium Torr. & A. Gray	= Weakley		= RAB	Fabaceae	Dico	Occasional	RWT			JBT		Ahles
Weakley (2012)		Galactia regularis (L.) Britton, Sterns, & Poggenb.	= Weakley		> G. macreei M.A. Curtis, G. volubilis (L.) Britton sensu RAB	Fabaceae	Dico				RJL	JBT
Weakley (2012)		Indigofera caroliniana Mill.	= Weakley		= RAB	Fabaceae	Dico					JBT
Weakley (2012)		Lespedeza angustifolia (Pursh) Elliott	= Weakley		= RAB	Fabaceae	Dico	Rare	RWT
Weakley (2012)		Lespedeza capitata Michx.	= Weakley		= RAB	Fabaceae	Dico	Infrequent	RWT			JBT	Wil
Weakley (2012)		Lespedeza hirta (L.) Hornem. var. curtissii (Clewell) Isely	= Weakley		< L. hirta (L.) Hornem. sensu RAB	Fabaceae	Dico	Rare	RWT			JBT
Weakley (2012)		Strophostyles umbellata (Muhl. ex Willd.) Britton	= Weakley		= RAB	Fabaceae	Dico									Neck
Weakley (2012)		Stylosanthes biflora (L.) Britton, Sterns & Poggenb.	= Weakley		= RAB	Fabaceae	Dico	Rare	RWT							JBT
Weakley (2012)		Tephrosia florida (F. Dietr.) C.E. Wood	= Weakley		= RAB	Fabaceae	Dico				RJL
Weakley (2012)		Tephrosia hispidula (Michx.) Pers.	= Weakley		= RAB	Fabaceae	Dico	Occasional	RWT			JBT
Weakley (2012)		Tephrosia spicata (Walter) Torr. & A. Gray	= Weakley		= RAB	Fabaceae	Dico									Neck
Weakley (2012)		Zornia bracteata J.F. Gmel.	= Weakley		= RAB	Fabaceae	Dico					JBT
Weakley (2012)		Quercus coccinea Münchh.	= Weakley	= FNA	= RAB	Fagaceae	Dico	Infrequent	RWT
Weakley (2012)		Quercus falcata Michx.	= Weakley	= FNA	= Q. falcata Michx. var. falcata sensu RAB	Fagaceae	Dico	Infrequent	RWT			JBT	Wil
Weakley (2012)		Quercus incana W. Bartram	= Weakley	= FNA	= RAB	Fagaceae	Dico	Infrequent	RWT			JBT
Weakley (2012)		Quercus laurifolia Michx.	= Weakley	= FNA	< RAB	Fagaceae	Dico	Frequent	RWT			JBT
Weakley (2012)		Quercus margarettae (Ashe) Small	= Weakley	= FNA	= Q. margaretta Ahles ex Small sensu RAB	Fagaceae	Dico	Infrequent	RWT			JBT
Weakley (2012)		Quercus marilandica Münchh. var. marilandica	= Weakley	= FNA	< Q. marilandica Münchh. sensu RAB	Fagaceae	Dico	Infrequent	RWT
Weakley (2012)		Quercus nigra L.	= Weakley	= FNA	= RAB	Fagaceae	Dico	Occasional	RWT			JBT	Wil
Weakley (2012)		Quercus stellata Wangenh.	= Weakley	= FNA	= RAB	Fagaceae	Dico						Wil
Weakley (2012)		Quercus velutina Lam.	= Weakley	= FNA	= RAB	Fagaceae	Dico					JBT
Weakley (2012)		Gelsemium sempervirens J. St.-Hil.	= Weakley		= RAB	Gelsemiaceae	Dico	Occasional	RWT			JBT
Weakley (2012)		Bartonia verna Raf. ex Barton	= Weakley		= RAB	Gentianaceae	Dico	Infrequent	RWT			JBT							W1	S2	G5?
Weakley (2012)		Bartonia virginica (L.) Britton, Sterns & Poggenb.	= Weakley		= RAB	Gentianaceae	Dico	Infrequent	RWT			JBT
Weakley (2012)		Gentiana autumnalis L.	= Weakley		= RAB	Gentianaceae	Dico	Occasional	RWT			JBT
Weakley (2012)		Gentiana catesbaei Walter	= Weakley		= RAB	Gentianaceae	Dico	Infrequent	RWT			JBT
Weakley (2012)		Gentiana saponaria L.	= Weakley		= RAB	Gentianaceae	Dico	Rare	RWT
Weakley (2012)		Sabatia angularis (L.) Pursh	= Weakley		= RAB	Gentianaceae	Dico						Wil
Weakley (2012)		Sabatia brachiata Elliott	= Weakley		= RAB	Gentianaceae	Dico	Infrequent	RWT			JBT		Ahles
Weakley (2012)		Sabatia campanulata (L.) Torr.	= Weakley		= RAB	Gentianaceae	Dico	Occasional	RWT			JBT
Weakley (2012)		Sabatia difformis (L.) Druce	= Weakley		= RAB	Gentianaceae	Dico	Frequent	RWT			JBT	Wil
Weakley (2012)		Sabatia gentianoides Elliott	= Weakley		= RAB	Gentianaceae	Dico	Rare	RWT			JBT
Weakley (2012)		Proserpinaca pectinata Lam.	= Weakley		= RAB	Haloragaceae	Dico	Occasional	RWT			JBT
Weakley (2012)		Fothergilla gardenii L.	= Weakley	= FNA	= RAB	Hamamelidaceae	Dico	Infrequent	RWT			JBT
Weakley (2012)		Hypericum brachyphyllum (Spach) Steud.	= Weakley			Hypericaceae	Dico	Frequent	RWT	RJL		JBT		RJL					SR-P	S1S2	G5
Weakley (2012)		Hypericum canadense L.	= Weakley		= RAB	Hypericaceae	Dico	Infrequent	RWT
Weakley (2012)		Hypericum cistifolium Lam.	= Weakley		= RAB	Hypericaceae	Dico	Frequent	RWT
Weakley (2012)		Hypericum crux-andreae (L.) Crantz	= Weakley		= H. stans (Michx. ex Willd.) W.P. Adams & N. Robson sensu RAB	Hypericaceae	Dico	Occasional	RWT			JBT
Weakley (2012)		Hypericum densiflorum Pursh var. densiflorum	= Weakley		< H. densiflorum sensu RAB	Hypericaceae	Dico	Occasional	RWT			JBT
Weakley (2012)		Hypericum denticulatum Walter	= Weakley		= H. denticulatum Walter var. denticulatum sensu RAB	Hypericaceae	Dico	Infrequent	RWT
Weakley (2012)		Hypericum galioides Lam.	= Weakley		= RAB	Hypericaceae	Dico	Occasional	RWT			JBT		RJL	Sorrie
Weakley (2012)		Hypericum gentianoides (L.) Britton, Sterns, & Poggenb.	= Weakley		= RAB	Hypericaceae	Dico	Occasional	RWT			JBT
Weakley (2012)		Hypericum gymnanthum Engelm. & A. Gray	= Weakley		= RAB	Hypericaceae	Dico	Occasional	RWT			JBT
Weakley (2012)		Hypericum hypericoides (L.) Crantz	= Weakley		= RAB	Hypericaceae	Dico	Infrequent	RWT			JBT
Weakley (2012)		Hypericum lloydii (Svenson) W.P. Adams	= Weakley		= RAB	Hypericaceae	Dico					JBT
Weakley (2012)		Hypericum mutilum L. var. mutilum	= Weakley		< H. mutilum L. sensu RAB	Hypericaceae	Dico	Occasional	RWT
Weakley (2012)		Hypericum setosum L.	= Weakley		= RAB	Hypericaceae	Dico	Rare	RWT			JBT
Weakley (2012)		Hypericum tenuifolium Pursh	= Weakley		= H. reductum (Svenson) W.P. Adams sensu RAB	Hypericaceae	Dico	Occasional	RWT			JBT	Wil
Weakley (2012)		Hypericum virginicum L.	= Weakley		= RAB	Hypericaceae	Dico							RWT
Weakley (2012)		Carya tomentosa (Poir.) Nutt.	= Weakley	= FNA	= RAB	Juglandaceae	Dico					JBT
Weakley (2012)		Hyptis alata Shinners	= Weakley		= RAB	Lamiaceae	Dico	Occasional	RWT			JBT	Wil
Weakley (2012)		Lycopus amplectens Raf.	= Weakley		= RAB	Lamiaceae	Dico	Rare	RWT			JBT		RJL					W1	S3	G5
Weakley (2012)		Lycopus rubellus Moench	= Weakley		= L. rubellus Moench var. rubellus sensu RAB	Lamiaceae	Dico	Rare	RWT			JBT
Weakley (2012)		Physostegia purpurea (Walter) S.F. Blake	= Weakley		< Dracocephalum purpureum (Walter) E.M. McClint. ex Gleason sensu RAB	Lamiaceae	Dico	Infrequent	RWT			JBT	Wil	Levy
Weakley (2012)		Pycnanthemum flexuosum (Walter) Britton, Sterns, & Poggenb.	= Weakley		= RAB	Lamiaceae	Dico	Frequent	RWT			JBT	Wil
Weakley (2012)		Pycnanthemum setosum Nutt.	= Weakley		= RAB	Lamiaceae	Dico	rare	RWT										SR-T	S2	G4
Weakley (2012)		Scutellaria integrifolia L.	= Weakley		> S. integrifolia L. var. integrifolia, S. integrifolia L. var. hispida Benth. sensu RAB	Lamiaceae	Dico	Frequent	RWT			JBT	Wil
Weakley (2012)		Persea palustris (Raf.) Sarg.	= Weakley		< P. borbonia (L.) Spreng. sensu RAB	Lauraceae	Dico	Frequent	RWT			JBT
Weakley (2012)		Sassafras albidum J. Presl	= Weakley	= FNA	= RAB	Lauraceae	Dico	Infrequent	RWT			JBT
Weakley (2012)		Pinguicula caerulea Walter	= Weakley		= RAB	Lentibulariaceae	Dico	Occasional	RWT			JBT	Wil
Weakley (2012)		Pinguicula pumila Michx.	= Weakley		= RAB	Lentibulariaceae	Dico	Infrequent	RWT			JBT							SR-P	S2	G4
Weakley (2012)		Utricularia juncea Vahl	= Weakley		= RAB	Lentibulariaceae	Dico	Rare	RWT			JBT
Weakley (2012)		Utricularia subulata L.	= Weakley		= RAB	Lentibulariaceae	Dico	Frequent	RWT			JBT	Wil
Weakley (2012)		Linum floridanum (Planch.) Trel. var. chrysocarpum C.M. Rogers	= Weakley		< L. virginianum L. var. floridanum Planch. sensu RAB	Linaceae	Dico					JBT		RJL					SR-T	S1S2	G5?T3?
Weakley (2012)		Linum floridanum (Planch.) Trel. var. floridanum	= Weakley		< L. virginianum L. var. floridanum Planch. sensu RAB	Linaceae	Dico	Occasional	RWT			JBT
Weakley (2012)		Linum intercursum E.P. Bicknell	= Weakley		< L. virginianum L. var. floridanum Planch. sensu RAB	Linaceae	Dico	Infrequent	RWT							JBT
Weakley (2012)		Linum medium (Planch.) Britton var. texanum (Planch.) Fernald	= Weakley		< L. virginianum L. var. medium Planch. sensu RAB	Linaceae	Dico	Infrequent	RWT			JBT	Wil				Wil
Weakley (2012)		Linum striatum Walter	= Weakley		= RAB	Linaceae	Dico	Infrequent	RWT							JBT
Weakley (2012)		Lindernia dubia (L.) Pennell var. anagallidea (Michx.) Cooperr.	= Weakley		< L. anagallidea (Michx.) Pennell sensu RAB	Linderniaceae	Dico	Rare	RWT
Weakley (2012)		Mitreola petiolata (J.F. Gmel.) Torr. & A. Gray	= Weakley		= Cynoctonum mitreola (L.) Britton sensu RAB	Loganiaceae	Dico	Rare	RWT			JBT	Wil
Weakley (2012)		Mitreola sessilifolia (J.F. Gmel.) G. Don	= Weakley		= Cynoctonum sessilifolium J.F. Gmel. sensu RAB	Loganiaceae	Dico	Infrequent	RWT			JBT	Wil
Weakley (2012)		Ammannia coccinea Rottb.	= Weakley		= RAB	Lythraceae	Dico						Wil	RJL
FNA		Liriodendron tulipifera L.	> L. tulipifera L. var. 1, L. tulipifera L. var. tulipifera sensu Weakley	= FNA	= RAB	Magnoliaceae	Basal Angio					JBT		Weakley
FNA		Magnolia virginiana L.	> M. virginiana L. var. australis Sarg., M. virginiana L. var. virginiana sensu Weakley	= FNA	= RAB	Magnoliaceae	Basal Angio	Frequent	RWT			JBT
Weakley (2012)		Rhexia alifanus Walter	= Weakley		= RAB	Melastomataceae	Dico	Frequent	RWT			JBT	Wil
Weakley (2012)		Rhexia lutea Walter	= Weakley		= RAB	Melastomataceae	Dico	Occasional	RWT			JBT	Wil	Levy
Weakley (2012)		Rhexia mariana L. var. exalbida Michx.	= Weakley		= RAB	Melastomataceae	Dico	Occasional	RWT
Weakley (2012)		Rhexia mariana L. var. mariana	= Weakley		= RAB	Melastomataceae	Dico	Rare	RWT			JBT
Weakley (2012)		Rhexia nashii Small	= Weakley		= R. mariana var. purpurea Michx. sensu RAB	Melastomataceae	Dico	Frequent	RWT			JBT	Wil
Weakley (2012)		Rhexia petiolata Walter	= Weakley		= RAB	Melastomataceae	Dico	Frequent	RWT			JBT	Wil
Weakley (2012)		Morella caroliniensis (Mill.) Small	= Weakley	= Myrica heterophylla Raf. sensu FNA	= Myrica heterophylla Raf. sensu RAB	Myricaceae	Dico	Frequent	RWT			JBT	Wil				Wil
Weakley (2012)		Morella cerifera (L.) Small	= Weakley	< Myrica cerifera L. sensu FNA	= Myrica cerifera L. var. cerifera sensu RAB	Myricaceae	Dico	Frequent	RWT			JBT	Wil
Weakley (2012)		Morella pumila (Michx.) Small	= Weakley	< Myrica cerifera L. sensu FNA	= Myrica cerifera L. var. pumila Michx. sensu RAB	Myricaceae	Dico	Frequent	RWT			JBT	Wil
Weakley (2012)		Nyssa biflora Walter	= Weakley		= N. sylvatica Marshall var. biflora (Walter) Sarg. sensu RAB	Nyssaceae	Dico	Occasional	RWT			JBT
Weakley (2012)		Nyssa sylvatica Marshall	= Weakley		= N. sylvatica Marshall var. sylvatica sensu RAB	Nyssaceae	Dico					JBT
Weakley (2012)		Fraxinus caroliniana Mill.	= Weakley		= RAB	Oleaceae	Dico	Infrequent	RWT			JBT
Weakley (2012)		Ludwigia hirtella Raf.	= Weakley		= RAB	Onagraceae	Dico	Infrequent	RWT			JBT
Radford, Ahles, & Bell (1968)		Ludwigia linearis Walter	> L. linearis Walter var. linearis, > L. linearis Walter var. puberula Engelm. & A. Gray sensu Weakley		= RAB	Onagraceae	Dico	Infrequent	RWT			JBT
Weakley (2012)		Ludwigia maritima R.M. Harper	= Weakley		= RAB	Onagraceae	Dico	Rare	RWT			JBT							W7	S2S3	G5
Weakley (2012)		Ludwigia microcarpa Michx.	= Weakley		= RAB	Onagraceae	Dico	Occasional	RWT			JBT	Wil
Weakley (2012)		Ludwigia virgata Michx.	= Weakley		= RAB	Onagraceae	Dico	Occasional	RWT			JBT
Weakley (2012)		Oenothera fruticosa L. var. unguiculata Fernald	= Weakley		< O. fruticosa L. sensu RAB	Onagraceae	Dico	Occasional	RWT	RJL		JBT		RJL					W7	S2S3	G5TNR
Weakley (2012)		Agalinis aphylla (Nutt.) Raf.	= Weakley		= RAB	Orobanchaceae	Dico	Occasional	RWT			JBT		Leonard			Sorrie		W1	S3	G3G4
Weakley (2012)		Agalinis fasciculata (Elliott) Raf.	= Weakley		= RAB	Orobanchaceae	Dico	Rare	RWT			JBT	Wil	RJL
Weakley (2012)		Agalinis linifolia (Nutt.) Britton	= Weakley		= RAB	Orobanchaceae	Dico	Occasional	RWT			JBT							W1	S3	G4?
Weakley (2012)		Agalinis obtusifolia Raf.	= Weakley		= RAB	Orobanchaceae	Dico	Infrequent	RWT			JBT							W1	S2S3	G4G5Q
Weakley (2012)		Agalinis purpurea (L.) Pennell	= Weakley		= RAB	Orobanchaceae	Dico	Frequent	RWT			JBT	Wil
Weakley (2012)		Agalinis setacea (J.F. Gmel.) Raf.	= Weakley		= RAB	Orobanchaceae	Dico				RJL
Weakley (2012)		Agalinis virgata Raf.	= Weakley		= RAB	Orobanchaceae	Dico									Neck			SR-P	S2	G3G4Q
Weakley (2012)		Pedicularis canadensis L.	= Weakley		= RAB	Orobanchaceae	Dico					RJL
Weakley (2012)		Seymeria cassioides (J.F. Gmel.) S.F. Blake	= Weakley		= RAB	Orobanchaceae	Dico	Frequent	RWT			JBT	Wil
Weakley (2012)		Parnassia caroliniana Michx.	= Weakley		= RAB	Parnassiaceae	Dico	Frequent	RWT			JBT						FSC	E	S2	G3
Weakley (2012)		Mimulus ringens L. var. ringens	= Weakley		< M. ringens L.sensu RAB	Phrymaceae	Dico					JBT
Weakley (2012)		Nuttallanthus canadensis (L.) D.A. Sutton	= Weakley		< Linaria canadensis (L.) Dum. Cours. sensu RAB	Plantaginaceae	Dico	Infrequent	RWT			JBT
Weakley (2012)		Penstemon australis Small	= Weakley		< RAB	Plantaginaceae	Dico										Wil
Weakley (2012)		Penstemon laevigatus Aiton	= Weakley		= RAB	Plantaginaceae	Dico					JBT	Wil
Weakley (2012)		Plantago sparsiflora Michx.	= Weakley		= RAB	Plantaginaceae	Dico					JBT	Wil	RJL	Leonard, Levy			FSC	E	S1S2	G3
Weakley (2012)		Sophronanthe pilosa (Michx.) Small	= Weakley		= Gratiola pilosa Michx. sensu RAB	Plantaginaceae	Dico	Occasional	RWT			JBT	Wil
Weakley (2012)		Polygala brevifolia Nutt.	= Weakley		= RAB	Polygalaceae	Dico	Infrequent	RWT			JBT
Weakley (2012)		Polygala cruciata L.	= Weakley		= RAB	Polygalaceae	Dico	Frequent	RWT			JBT	Wil				Wil
Weakley (2012)		Polygala hookeri Torr. & A. Gray	= Weakley		= RAB	Polygalaceae	Dico	Occasional	RWT			JBT							SR-T	S2S3	G3
Weakley (2012)		Polygala incarnata L.	= Weakley		= RAB	Polygalaceae	Dico	Occasional	RWT			JBT	Wil
Weakley (2012)		Polygala lutea L.	= Weakley		= RAB	Polygalaceae	Dico	Abundant	RWT			JBT	Wil	Wyland
Weakley (2012)		Polygala ramosa Elliott	= Weakley		= RAB	Polygalaceae	Dico	Occasional	RWT			JBT	Wil
Weakley (2011)		Polygala verticillata L.	> P. verticillata var. isocycla Fernald, P. verticillata var. verticillata sensu Weakley		= P. verticillata var. verticillata sensu RAB	Polygalaceae	Dico							Bradley
Weakley (2012)		Lysimachia asperulifolia Poir.	= Weakley	= FNA	= L. asperulaefolia Poir. sensu RAB	Primulaceae	Dico	rare	RWT		RJL, RWT						Sorrie	E	E	S3	G3
Weakley (2012)		Lysimachia loomisii Torr.	= Weakley	= FNA	= RAB	Primulaceae	Dico	Infrequent	RWT			JBT		Cooper					W1	S3	G3
Weakley (2012)		Clematis crispa L.	= Weakley	= FNA	= RAB	Ranunculaceae	Dico	Infrequent	RWT			JBT
Weakley (2012)		Thalictrum cooleyi H.E. Ahles	= Weakley	= FNA	= RAB	Ranunculaceae	Dico	Infrequent		RJL, Sorrie		JBT		Ahles	Gardner			E	E	S2	G2
Weakley (2012)		Berchemia scandens (Hill) K. Koch	= Weakley		= RAB	Rhamnaceae	Dico	Infrequent	RWT			JBT	Wil
Weakley (2012)		Amelanchier canadensis (L.) Medik.	= Weakley		= RAB	Rosaceae	Dico	rare	RWT			JBT
Weakley (2012)		Amelanchier spicata (Lam.) K. Koch	= Weakley		= RAB	Rosaceae	Dico						Wil
Weakley (2012)		Aronia arbutifolia (L.) Pers.	= Weakley		= Sorbus arbutifolia (L.) Heynh. var. arbutifolia sensu RAB	Rosaceae	Dico	Frequent	RWT			JBT
Weakley (2012)		Potentilla simplex Michx.	= Weakley		= RAB	Rosaceae	Dico					JBT
Weakley (2012)		Prunus serotina Ehrh. var. serotina	= Weakley		< RAB	Rosaceae	Dico					JBT	Wil
Weakley (2012)		Rosa palustris Marshall	= Weakley		= RAB	Rosaceae	Dico	rare	RWT			JBT	Wil
Weakley (2012)		Rubus cuneifolius Pursh	= Weakley		= RAB	Rosaceae	Dico					JBT
Weakley (2012)		Rubus pensilvanicus Poir.	= Weakley		> R. argutus Link, R. betulifolius Small sensu RAB	Rosaceae	Dico	Infrequent	RWT			JBT
Weakley (2012)		Diodia teres Walter	= Weakley		= RAB	Rubiaceae	Dico	Infrequent	RWT			JBT
Weakley (2012)		Diodia virginiana L.	= Weakley		= RAB	Rubiaceae	Dico	Frequent	RWT			JBT	Wil
Weakley (2012)		Mitchella repens L.	= Weakley		= RAB	Rubiaceae	Dico	Infrequent	RWT			JBT
Weakley (2012)		Oldenlandia uniflora L.	= Weakley		= RAB	Rubiaceae	Dico	Infrequent	RWT
Weakley (2012)		Salix caroliniana Michx.	= Weakley	= FNA	= RAB	Salicaceae	Dico	Rare	RWT			JBT	Wil
Weakley (2012)		Phoradendron leucarpum (Raf.) Reveal & M.C. Johnst. ssp. leucarpum	= Weakley		< P. serotinum (Raf.) M.C. Johnst. sensu RAB	Santalacaceae	Dico	Infrequent	RWT			JBT
Radford, Ahles, & Bell (1968)		Acer rubrum L.	> A. rubrum L. various varieties sensu Weakley		= RAB	Sapindaceae	Dico	Abundant	RWT			JBT	Wil
Weakley (2012)		Sarracenia flava L.	= Weakley	= FNA	= RAB	Sarraceniaceae	Dico	Abundant	RWT			JBT		Wyland					W5B	S3S4	G5?
Weakley (2012)		Sarracenia purpurea L. ssp. venosa (Raf.) Fernald	= Weakley	= FNA	< S. purpurea L. sensu RAB	Sarraceniaceae	Dico	Abundant	RWT			JBT		Wyland
Weakley (2012)		Sarracenia rubra Walter ssp. rubra	= Weakley	= FNA	< S. rubra Walter sensu RAB	Sarraceniaceae	Dico				RJL	JBT							W5B	S3	G4T3T4
Weakley (2012)		Symplocos tinctoria (L.) L’Hér.	= Weakley	= FNA	= RAB	Symplocaceae	Dico	Occasional	RWT			JBT	Wil
Weakley (2012)		Polypremum procumbens L.	= Weakley	= FNA	= RAB	Tetrachondraceae	Dico	Frequent	RWT			JBT	Wil
Weakley (2012)		Gordonia lasianthus (L.) J. Ellis	= Weakley	= FNA	= RAB	Theaceae	Dico	Occasional	RWT			JBT
Weakley (2012)		Viola brittoniana Pollard	= Weakley		> V. brittoniana Pollard var. brittoniana, V. brittoniana Pollard var. pectinata (E.P. Bicknell) Alexander sensu RAB	Violaceae	Dico	Rare	RWT										W7	S2?	G4G5
Weakley (2012)		Viola lanceolata L. var. lanceolata	= Weakley		< V. lanceolata L. sensu RAB	Violaceae	Dico	Occasional	RWT			JBT
Weakley (2012)		Viola lanceolata L. var. vittata (Greene) Weath. & Griscom	= Weakley		< V. lanceolata L. sensu RAB	Violaceae	Dico	Infrequent	RWT
Weakley (2012)		Viola primulifolia L.	= Weakley		= RAB	Violaceae	Dico	Frequent	RWT			JBT
Weakley (2012)		Viola sagittata Aiton var. sagittata	= Weakley		> V. sagittata Aiton, V. emarginata (Nutt.) Leconte var. emarginata, V. emarginata (Nutt.) Leconte var. acutiloba Brainerd sensu RAB	Violaceae	Dico	Infrequent	RWT			JBT
Weakley (2012)		Viola septemloba Leconte	= Weakley		< RAB	Violaceae	Dico	Infrequent	RWT
Weakley (2012)		Viola sororia Willd. var. missouriensis (Greene) L.E. McKinney	= Weakley		= V. affinis Leconte sensu RAB	Violaceae	Dico	Occasional	RWT			JBT		RJL
Weakley (2012)		Parthenocissus quinquefolia (L.) Planch.	= Weakley		= RAB	Vitaceae	Dico	Infrequent	RWT			JBT
Weakley (2011)		Vitis rotundifolia Michx. var. rotundifolia	= Muscadinia rotundifolia (Michx.) Small var. rotundifolia sensu Weakley		= V. rotundifolia sensu RAB	Vitaceae	Dico	Infrequent	RWT			JBT

## Sheet: Pie chart
		% of total
Taxa known from SCP only	77	13.9493
Taxa known from SR+V only	102	18.4783
Taxa known from both SCP and SR+V	373	67.5725
Total	552	100
