# Supplementary material for: Guide to the Vascular Flora of the Savannas and Flatwoods of Shaken Creek Preserve and Vicinity (Pender & Onslow Counties, North Carolina, U.S.A.)
Source: Biodivers Data J. 2014 May 16;(2):e1099. doi: 10.3897/BDJ.2.e1099 (PMC4107865; doi:10.3897/BDJ.2.e1099)
Supplement: Supplementary material 3 — Richest families data [file biodiversity_data_journal-2-e1099-s003.xlsx]

## Sheet: Richest families
	SCP	SR+V	SCP and SR+V
Other families	161	159	180
Poaceae	71	57	81
Cyperaceae	54	62	72
Asteraceae	48	65	68
Fabaceae	13	19	24
Ericaceae	15	17	18
Juncaceae	16	15	18
Orchidaceae	15	15	18
Hypericaceae	13	11	15
Xyridaceae	8	10	12
Apiaceae	9	10	10
Gentianaceae	9	9	10
Fagaceae	7	7	9
Orobanchaceae	7	8	9
Rosaceae	4	8	8
Column Totals	289	313	372
Tabulated Totals (added from another spreadsheet)	450	472	552
