# Supplementary material for: Guide to the Vascular Flora of the Savannas and Flatwoods of Shaken Creek Preserve and Vicinity (Pender & Onslow Counties, North Carolina, U.S.A.)
Source: Biodivers Data J. 2014 May 16;(2):e1099. doi: 10.3897/BDJ.2.e1099 (PMC4107865; doi:10.3897/BDJ.2.e1099)
Supplement: Supplementary material 4 — Richest genera data [file biodiversity_data_journal-2-e1099-s004.xlsx]

## Sheet: Richest genera
	SCP	SR+V	SCP and SR+V
Rhynchospora	27	33	35
Dichanthelium	22	15	26
Juncus	16	15	18
Hypericum	13	11	15
Xyris	8	10	12
Andropogon	9	8	10
Scleria	8	7	10
Carex	5	9	9
Quercus	7	7	9
Eupatorium	5	7	8
Agalinis	6	5	7
Polygala	6	7	7
Solidago	4	6	7
Spiranthes	5	5	7
Viola	7	4	7
Totals	148	149	187
