# Supplementary material for: Guide to the Vascular Flora of the Savannas and Flatwoods of Shaken Creek Preserve and Vicinity (Pender & Onslow Counties, North Carolina, U.S.A.)
Source: Biodivers Data J. 2014 May 16;(2):e1099. doi: 10.3897/BDJ.2.e1099 (PMC4107865; doi:10.3897/BDJ.2.e1099)
Supplement: Supplementary material 5 — Taxa by habit and community type data [file biodiversity_data_journal-2-e1099-s005.xlsx]

## Sheet: SCP taxa by community type
Taxon	RAB	Family	Clade	Abundance	Coll SCP (RWT)	Coll SCP (Other)	Report (SCP)	PSOS	MPS	WPF	SPS-T	SPS-RF	WLPS	VWLPS	FS	SS	SR	GR	Exotic?
Woodwardia areolata (L.) Moore	=	Blechnaceae	F+FA	Occasional	RWT							x		x
Woodwardia virginica (L.) Sm.	=	Blechnaceae	F+FA	Frequent	RWT					x	x	x	x	x
Pteridium aquilinum (L.) Kuhn var. pseudocaudatum (Clute) A. Heller	= Pteridium aquilinum (Linnaeus) Kuhn var. pseudocaudatum (Clute) Heller – RAB	Dennstaedtiaceae	F+FA	Abundant	RWT			x	x	x	x	x	x	x
Lycopodiella alopecuroides (L.) Cranfill	< Lycopodium alopecuroides Linnaeus – RAB	Lycopodiaceae	F+FA	Frequent	RWT						x	x	x	x
Lycopodiella appressa (Chapm.) Cranfill	= Lycopodium appressum (Chapman) Lloyd & Underwood – RAB	Lycopodiaceae	F+FA	Occasional	RWT						x	x
Pseudolycopodiella caroliniana (L.) Holub	= Lycopodium carolinianum Linnaeus – RAB	Lycopodiaceae	F+FA	Occasional	RWT							x	x
Osmunda regalis L. var. spectabilis (Willd.) A. Gray	= O. regalis Linnaeus var. spectabilis (Willdenow) A. Gray – RAB	Osmundaceae	F+FA	Occasional	RWT					x			x	x
Osmundastrum cinnamomeum (L.) C. Presl	= Osmunda cinnamomea Linnaeus – RAB	Osmundaceae	F+FA	Frequent	RWT					x	x	x	x	x
Selaginella apoda (L.) C. Morren	= RAB	Selaginellaceae	F+FA	Infrequent	RWT								x	x
Taxodium ascendens Brongn.	= RAB	Cuppressaceae	Gymn	Frequent	RWT								x	x
Pinus elliottii Engelm. var. elliottii	< P. elliottii – RAB	Pinaceae	Gymn	Infrequent	RWT					x									y
Pinus palustris Mill.	=	Pinaceae	Gymn	Abundant	RWT			x	x	x	x	x	x	x
Pinus serotina Michx.	=	Pinaceae	Gymn	Abundant	RWT					x	x	x	x	x
Pinus taeda L.	=	Pinaceae	Gymn	Frequent	RWT					x			x	x
Yucca filamentosa L.	= Y. filamentosa var. filamentosa – RAB	Agavaceae	Mono	Infrequent	RWT				x
Allium species 1	n/a	Amaryllidaceae	Mono	Rare	RWT									x	FSC	SR-L	S1S2	G1G2
Tillandsia usneoides (L.) L.	=	Bromeliaceae	Mono	Infrequent	RWT								x	x
Burmannia capitata (Walter ex J.F. Gmel.) Mart.	= RAB	Burmanniaceae	Mono	Infrequent	RWT								x
Bulbostylis ciliatifolia (Elliott) Fernald	=	Cyperaceae	Mono	Infrequent	RWT								x	x
Carex elliottii Schwein. & Torr.	= RAB	Cyperaceae	Mono	Infrequent	RWT						x
Carex glaucescens Elliott	=	Cyperaceae	Mono	Frequent	RWT					x	x	x	x	x
Carex lonchocarpa Willd. ex Spreng.	= C. folliculata Linnaeus var. australis L.H. Bailey – RAB	Cyperaceae	Mono	Occasional	RWT								x	x
Carex lutea LeBlond	n/a	Cyperaceae	Mono	Infrequent	RWT	Sorrie								x	E	E	S2	G2
Carex striata Michx.	< C. walteriana L.H. Bailey – RAB	Cyperaceae	Mono	Occasional	RWT							x	x	x
Cladium jamaicense Crantz	=	Cyperaceae	Mono	Infrequent	RWT									x
Cladium mariscoides (Muhl.) Torr.	=	Cyperaceae	Mono				RJL						x			SR-O	S3	G5
Dulichium arundinaceum (L.) Britton var. arundinaceum	< D. arundinaceum – RAB	Cyperaceae	Mono	Infrequent	RWT								x
Eleocharis baldwinii (Torr.) Chapm.	= RAB	Cyperaceae	Mono	Infrequent	RWT					x
Eleocharis equisetoides (Elliott) Torr.	=	Cyperaceae	Mono	Rare	RWT	RJL										W1	S3	G4
Eleocharis microcarpa Torr. var. filiculmis Torr.	< E. microcarpa – RAB	Cyperaceae	Mono	Occasional	RWT					x	x	x	x	x
Eleocharis tuberculosa (Michx.) Roem. & Schult.	=	Cyperaceae	Mono	Occasional	RWT						x	x		x
Fimbristylis puberula (Michx.) Vahl var. puberula	< F. spadicea (Linnaeus) Vahl – RAB	Cyperaceae	Mono	Infrequent	RWT						x	x	x	x
Fuirena breviseta (Coville) Coville	< F. squarrosa – RAB	Cyperaceae	Mono	Infrequent	RWT								x	x
Fuirena pumila (Torr.) Spreng.	= RAB	Cyperaceae	Mono	Rare	RWT								x
Isolepis carinata Hook. & Arn. ex Torr.	= Scirpus koilolepis (Steudel) Gleason – RAB	Cyperaceae	Mono	Rare	RWT						x					SR-P	S1	G5
Kyllinga odorata Vahl	= Cyperus sesquiflorus (Torrey) Mattfeld & Kükenthal ex Kükenthal – RAB	Cyperaceae	Mono	Infrequent	RWT					x
Rhynchospora baldwinii A. Gray	=	Cyperaceae	Mono	Infrequent	RWT					x	x		x	x
Rhynchospora caduca Elliott	=	Cyperaceae	Mono	Frequent	RWT					x		x	x	x
Rhynchospora cephalantha A. Gray var. cephalantha	< Rh. cephalantha – RAB	Cyperaceae	Mono	Frequent	RWT					x	x	x	x	x
Rhynchospora chalarocephala Fernald & Gale	=	Cyperaceae	Mono	Frequent	RWT						x
Rhynchospora chapmanii M.A. Curtis	= RAB	Cyperaceae	Mono	Occasional	RWT						x	x	x	x
Rhynchospora ciliaris (Michx.) C. Mohr	=	Cyperaceae	Mono	Frequent	RWT					x	x	x	x	x
Rhynchospora colorata (L.) H. Pfeiff.	= Dichromena colorata (Linnaeus) H. Pfeiffer – RAB	Cyperaceae	Mono	Infrequent	RWT								x	x
Rhynchospora decurrens Chapm.	=	Cyperaceae	Mono	Rare	RWT									x	FSC	SR-P	S1S2	G3G4
Rhynchospora distans (Michx.) Vahl	< R. fascicularis – RAB	Cyperaceae	Mono	Infrequent	RWT					x		x
Rhynchospora fascicularis (Michx.) Vahl	< R. fascicularis – RAB	Cyperaceae	Mono				RJL			x	x	x
Rhynchospora filifolia A. Gray	=	Cyperaceae	Mono	Frequent	RWT						x		x	x
Rhynchospora galeana Naczi, W.M. Knapp & G. Moor	= R. breviseta (Gale) Channell – RAB	Cyperaceae	Mono	Infrequent	RWT							x
Rhynchospora globularis (Chapm.) Small	< R. globularis – RAB	Cyperaceae	Mono	Infrequent	RWT									x
Rhynchospora gracilenta A. Gray	=	Cyperaceae	Mono	Occasional	RWT							x	x	x
Rhynchospora inexpansa (Michx.) Vahl	=	Cyperaceae	Mono	Frequent	RWT						x	x	x
Rhynchospora latifolia (Baldwin) W.W. Thomas	= Dichromena latifolia Baldwin ex Elliott – RAB	Cyperaceae	Mono	Occasional	RWT								x	x
Rhynchospora macrostachya Torr. ex A. Gray	=	Cyperaceae	Mono	Infrequent	RWT								x
Rhynchospora microcarpa Baldwin ex A. Gray	=	Cyperaceae	Mono	Infrequent	RWT									x		SR-P	S2	G5
Rhynchospora nitens (Vahl) A. Gray	= Psilocarya nitens (Vahl) Wood – RAB	Cyperaceae	Mono	Occasional	RWT								x	x		WI	S3	G4?
Rhynchospora pallida M.A. Curtis	= RAB	Cyperaceae	Mono	Infrequent	RWT					x	x	x	x			WI	S3	G3
Rhynchospora pinetorum Britton & Small	< R. globularis – RAB	Cyperaceae	Mono	Infrequent	RWT									x		SR-T	S2	G5?T3?
Rhynchospora plumosa Elliott	=	Cyperaceae	Mono	Frequent	RWT					x	x	x	x	x
Rhynchospora pusilla Chapm. ex M.A. Curtis	= Rh. intermixta C. Wright – RAB	Cyperaceae	Mono	Occasional	RWT						x			x
Rhynchospora rariflora (Michx.) Elliott	=	Cyperaceae	Mono	Occasional	RWT								x	x
Rhynchospora thornei Kral	n/a	Cyperaceae	Mono	Infrequent		RJL								x	FSC	E	S2	G3
Rhynchospora torreyana A. Gray	=	Cyperaceae	Mono	Occasional	RWT								x	x
Rhynchospora wrightiana Boeck.	=	Cyperaceae	Mono	Infrequent	RWT						x					W1	S3	G5
Schoenoplectus pungens (Vahl) Palla var. pungens	< Scirpus americanus – RAB	Cyperaceae	Mono	Infrequent	RWT								x
Scirpus cyperinus (L.) Kunth	=	Cyperaceae	Mono	Rare	RWT
Scleria baldwinii (Torr.) Steud.	=	Cyperaceae	Mono	Infrequent	RWT									x		SR-P	S2	G4
Scleria ciliata Michx. var. ciliata		Cyperaceae	Mono	Occasional	RWT					x				x
Scleria ciliata var. glabra		Cyperaceae	Mono				RJL			x
Scleria georgiana Core	=	Cyperaceae	Mono				RJL							x		W1	S3	G4
Scleria minor (Britton) W. Stone	=	Cyperaceae	Mono	Infrequent	RWT						x	x	x
Scleria muehlenbergii Steud.	< S. reticularis Michaux – RAB	Cyperaceae	Mono	Occasional	RWT							x	x	x
Scleria pauciflora Muhl. ex Willd. var. caroliniana (Willd.) Alph. Wood	< S. pauciflora – RAB	Cyperaceae	Mono	Occasional	RWT					x			x
Scleria triglomerata Michx.	< S. triglomerata Michaux – RAB	Cyperaceae	Mono	Occasional	RWT					x
Dioscorea villosa L.	> D. villosa var. villosa – RAB	Dioscoreaceae	Mono	Rare	RWT									x
Eriocaulon compressum Lam.	=	Eriocaulaceae	Mono				RJL					x
Eriocaulon decangulare L. var. decangulare	< E. decangulare – RAB	Eriocaulaceae	Mono	Frequent	RWT					x	x	x	x	x
Lachnocaulon anceps (Walter) Morong	=	Eriocaulaceae	Mono	Frequent	RWT					x	x	x	x	x
Lachnanthes caroliniana (Lam.) Dandy	=	Haemodoraceae	Mono	Frequent	RWT					x	x	x	x	x
Chamaelirium luteum (L.) A. Gray	=	Heloniadaceae	Mono	Rare	RWT				x							W5B	S5	G5
Hypoxis curtissii Rose	= H. hirsuta (Linnaeus) Coville var. leptocarpa (Engelmann & A. Gray) Fernald – RAB	Hypoxidaceae	Mono				RJL					x		x
Hypoxis hirsuta (L.) Coville	= H. hirsuta var. hirsuta – RAB	Hypoxidaceae	Mono	Frequent	RWT					x			x	x
Hypoxis sessilis L.	=	Hypoxidaceae	Mono	Occasional	RWT						x		x	x		SR-P	SH	G4
Hypoxis wrightii (Baker) Brackett	= H. micrantha Pollard – RAB	Hypoxidaceae	Mono	Occasional	RWT						x		x
Iris tridentata Pursh	=	Iridaceae	Mono	Occasional	RWT					x	x	x	x	x
Iris verna L. var. verna	=	Iridaceae	Mono	Frequent	RWT					x	x	x	x	x
Iris virginica L. var. virginica	< I. virginica – RAB	Iridaceae	Mono	Occasional	RWT
Sisyrinchium angustifolium Mill.	=	Iridaceae	Mono	Occasional	RWT					x			x	x
Sisyrinchium atlanticum E.P. Bicknell	= S. mucronatum var. atlanticum (E.P. Bicknell) Ahles – RAB	Iridaceae	Mono	Occasional	RWT			x		x			x	x
Sisyrinchium capillare E.P. Bicknell	< S. albidum – RAB	Iridaceae	Mono	Occasional	RWT					x			x	x
Juncus biflorus Elliott	=	Juncaceae	Mono	Frequent	RWT					x	x	x	x	x
Juncus bufonius L.	=	Juncaceae	Mono	Occasional	RWT						x
Juncus canadensis J. Gay ex Laharpe	=	Juncaceae	Mono	Rare	RWT						x
Juncus coriaceus Mack.	=	Juncaceae	Mono	Infrequent	RWT						x
Juncus dichotomus Elliott	> J. dichotomus – RAB; > J. platyphyllus (Wiegand) Fernald – RAB	Juncaceae	Mono	Frequent	RWT								x	x
Juncus effusus L. ssp. solutus (Fernald & Wiegand) Hämet-Ahti	< J. effusus – RAB	Juncaceae	Mono	Rare	RWT					x				x
Juncus elliottii Chapm.	=	Juncaceae	Mono	Occasional	RWT								x
Juncus marginatus Rostk.	=	Juncaceae	Mono	Infrequent	RWT								x
Juncus megacephalus M.A. Curtis	=	Juncaceae	Mono	Occasional	RWT									x
Juncus pelocarpus E. Mey.	> J. abortivus Chapman – RAB	Juncaceae	Mono	Infrequent	RWT					x				x
Juncus polycephalos Michx.	=	Juncaceae	Mono	Frequent	RWT								x	x
Juncus repens Michx.	=	Juncaceae	Mono	Infrequent	RWT
Juncus scirpoides Lam. var. compositus R.M. Harper	< J. scirpoides – RAB	Juncaceae	Mono	Infrequent	RWT						x	x
Juncus scirpoides Lam. var. scirpoides	< J. scirpoides – RAB	Juncaceae	Mono	Occasional	RWT					x	x		x
Juncus trigonocarpus Steud.	= RAB	Juncaceae	Mono	Infrequent	RWT
Juncus validus Coville var. validus	< J. validus – RAB	Juncaceae	Mono	Occasional	RWT
Lilium catesbaei Walter	> L. catesbaei var. catesbaei – RAB; > L. catesbaei var. longii Fernald – RAB	Liliaceae	Mono	Occasional	RWT					x	x	x	x	x
Amianthium muscitoxicum (Walter) A. Gray	= A. muscaetoxicum – RAB	Melanthiaceae	Mono	Rare	RWT								x
Stenanthium densum (Desr.) Zomlefer & Judd	=	Melanthiaceae	Mono	Frequent	RWT						x	x	x	x
Veratrum virginicum (L.) W.T. Aiton	= Melanthium virginicum Linnaeus – RAB	Melanthiaceae	Mono	Infrequent	RWT								x	x
Zigadenus glaberrimus Michx.	=	Melanthiaceae	Mono	Frequent	RWT					x	x	x	x
Aletris aurea Walter	=	Nartheciaceae	Mono	Occasional	RWT								x	x
Aletris farinosa L.	=	Nartheciaceae	Mono	Frequent	RWT					x	x	x	x	x		W5B	S5	G5
Aletris lutea Small	n/a	Nartheciaceae	Mono	Rare	RWT									x
Calopogon barbatus (Walter) Ames	=	Orchidaceae	Mono	Occasional	RWT						x	x	x	x
Calopogon pallidus Chapm.	=	Orchidaceae	Mono	Occasional	RWT						x	x	x	x
Calopogon tuberosus (L.) Britton, Sterns & Poggenb. var. tuberosus	= C. pulchellus R. Brown – RAB	Orchidaceae	Mono	Infrequent	RWT							x	x	x
Cleistesiopsis divaricata (L.) Pansarin & F. Barros	< Cleistes divaricata – RAB(also see Cleistes bifaria)	Orchidaceae	Mono	Infrequent	RWT					x	x	x	x	x
Cleistesiopsis oricamporum P.M. Br.	< Cleistes divaricata – RAB	Orchidaceae	Mono				RJL			x
Platanthera blephariglottis (Willd.) Lindl.	< Habenaria blephariglottis (Willdenow) Hooker var. blephariglottis – RAB	Orchidaceae	Mono	Rare	RWT							x
Platanthera ciliaris (L.) Lindl.	= Habenaria ciliaris (Linnaeus) R. Brown – RAB	Orchidaceae	Mono				RJL					x
Platanthera cristata (Michx.) Lindl.	= Habenaria cristata (Michaux) R. Brown – RAB	Orchidaceae	Mono	Rare	RWT							x
Platanthera integra (Nutt.) A. Gray ex L.C. Beck	= Habenaria integra (Nuttall) Sprengel – RAB	Orchidaceae	Mono				RJL					x				T	S2	G3G4
Pogonia ophioglossoides (L.) Ker Gawl.	=	Orchidaceae	Mono	Rare	RWT							x		x
Spiranthes cernua (L.) Rich.	= S. cernua var. cernua – RAB	Orchidaceae	Mono	Occasional	RWT					x				x
Spiranthes eatonii Ames ex P.M. Br.	n/a	Orchidaceae	Mono	Infrequent	RWT								x	x		SR-L	S2	G2G4
Spiranthes laciniata (Small) Ames	=	Orchidaceae	Mono	Infrequent	RWT								x			SR-P	S2	G4G5
Spiranthes praecox (Walter) S. Watson	< S. praecox – RAB	Orchidaceae	Mono	Rare	RWT						x			x
Spiranthes vernalis Engelm & A. Gray		Orchidaceae	Mono	Infrequent	RWT								x
Agrostis altissima (Walter) Tuck.	< A. perennans – RAB	Poaceae	Mono	Occasional	RWT								x	x		SR-T	S2	G4
Agrostis hyemalis (Walter) Britton, Sterns, & Poggenb.	=	Poaceae	Mono	Occasional	RWT						x		x
Agrostis perennans (Walter) Tuck.	< A. perennans – RAB	Poaceae	Mono	Infrequent	RWT								x
Amphicarpum amphicarpon (Pursh) Nash	= Amphicarpum purshii Kunth – RAB	Poaceae	Mono	Occasional	RWT						x	x				W1	S3	G4
Andropogon dealbatus (C. Mohr ex Hack.) Weakley & LeBlond		Poaceae	Mono	Occasional	RWT						x			x
Andropogon gerardii Vitman	=	Poaceae	Mono	Occasional	RWT								x	x
Andropogon glaucopsis Steud.	< A. virginicus – RAB	Poaceae	Mono	Occasional	RWT						x	x
Andropogon glomeratus (Walter) Britton, Sterns, & Poggenb. var. glomeratus	< A. virginicus – RAB	Poaceae	Mono	Frequent	RWT					x	x	x	x	x
Andropogon glomeratus (Walter) Britton, Sterns, & Poggenb. var. hirsutior (Hack.) C. Mohr	< A. virginicus – RAB	Poaceae	Mono	Occasional	RWT					x		x	x	x
Andropogon perangustatus Nash	n/a	Poaceae	Mono	Infrequent	RWT								x			W1	S2S3	G4
Andropogon tenuispatheus (Nash) Nash	< A. virginicus – RAB	Poaceae	Mono	Infrequent	RWT								x
Andropogon virginicus L. var. decipiens C.S. Campb.	< A. virginicus – RAB	Poaceae	Mono	Occasional	RWT						x			x		W7	S1S2	G5T4
Andropogon virginicus L. var. virginicus [<	< A. virginicus – RAB	Poaceae	Mono	Occasional	RWT						x		x
Anthenantia rufa (Elliott) Schult.	= Anthaenantia rufa – RAB	Poaceae	Mono	Frequent	RWT					x	x		x	x		W1	S2	G5
Aristida palustris (Chapm.) Vasey	= A. affinis (Schultes) Kunth – RAB	Poaceae	Mono	Occasional	RWT								x	x
Aristida simpliciflora Chapm.	n/a	Poaceae	Mono	Rare	RWT								x			SR-T	S1S2	G3G4
Aristida stricta Michx.	< A. stricta – RAB	Poaceae	Mono	Abundant	RWT			x	x	x	x	x	x	x
Aristida virgata Trin.	=	Poaceae	Mono	Frequent	RWT					x	x	x	x	x
Arundinaria tecta (Walter) Muhl.	< A. gigantea (Walter) Muhlenberg – RAB	Poaceae	Mono	Frequent	RWT					x	x	x	x	x
Calamagrostis coarctata Eaton	= C. cinnoides (Muhlenberg) W.P.C. Barton – RAB	Poaceae	Mono	Occasional	RWT									x
Calamovilfa brevipilis (Torr.) Hack. ex Scribn. & Southw.	=	Poaceae	Mono	Occasional	RWT							x				W1	S3	G4
Chasmanthium laxum (L.) Yates	= Uniola laxa(Linnaeus) Britton, Sterns, & Poggenburg – RAB	Poaceae	Mono	Occasional	RWT							x	x	x
Coelorachis rugosa (Nutt.) Nash	= Manisuris rugosa (Nuttall) Kuntze – RAB	Poaceae	Mono	Occasional	RWT						x		x	x		W1	S3	G5
Coleataenia anceps (Michx.) Soreng ssp. anceps	= Panicum anceps Michaux var. anceps – RAB	Poaceae	Mono	Occasional	RWT							x		x
Coleataenia anceps (Michx.) Soreng ssp. rhizomata (Hitchc. & Chase) Soreng	= Panicum anceps Michaux var. rhizomatum (A.S. Hitchcock & Chase) Fernald – RAB	Poaceae	Mono	Occasional	RWT								x	x
Coleataenia longifolia (Torr.) Soreng ssp. combsii (Scribn. & C.R. Ball) Soreng	= Panicum longifolium Torrey var. combsii (Scribner & C.R. Ball) Fernald – RAB	Poaceae	Mono	Occasional	RWT								x	x
Coleataenia longifolia (Torr.) Soreng ssp. longifolia	= Panicum longifolium Torrey var. longifolium – RAB	Poaceae	Mono	Frequent	RWT					x	x	x		x
Ctenium aromaticum (Walter) Alph. Wood	=	Poaceae	Mono	Abundant	RWT						x	x	x	x
Danthonia sericea Nutt.	= D. sericea var. sericea – RAB	Poaceae	Mono	Infrequent	RWT				x
Dichanthelium acuminatum (Sw.) Gould & C.A. Clark var. fasciculatum (Torr.) Freckmann	< Panicum lanuginosum Elliott – RAB	Poaceae	Mono	Infrequent	RWT						x		x	x
Dichanthelium acuminatum (Sw.) Gould & C.A. Clark var. lindheimeri (Nash) Gould & C.A. Clark	< Panicum lanuginosum Elliott – RAB	Poaceae	Mono				RJL
Dichanthelium caerulescens (Hack. ex Hitchc.) Correll	< Panicum dichotomum Linnaeus – RAB	Poaceae	Mono	Rare	RWT	RJL							x	x		E	S1S2	G2G3
Dichanthelium chamaelonche (Trin.) Freckmann & Lelong ssp. chamaelonche	= Panicum chamaelonche Trinius – RAB	Poaceae	Mono	Infrequent	RWT					x
Dichanthelium commutatum (Schult.) Gould var. commutatum	< Panicum commutatum Schultes – RAB	Poaceae	Mono	Rare	RWT									x
Dichanthelium consanguineum (Kunth) Gould & C.A. Clark	= Panicum consanguineum Kunth – RAB	Poaceae	Mono	Occasional	RWT							x	x	x
Dichanthelium dichotomum (L.) Gould var. nitidum (Lam.) LeBlond	< Panicum dichotomum Linnaeus – RAB	Poaceae	Mono	Infrequent	RWT								x	x
Dichanthelium dichotomum (L.) Gould var. roanokense (Ashe) LeBlond	< Panicum dichotomum Linnaeus – RAB	Poaceae	Mono	Occasional	RWT								x	x		W1	S2	G5T4?
Dichanthelium ensifolium (Baldwin ex Elliott) Gould	< Panicum ensifolium Baldwin ex Elliott – RAB	Poaceae	Mono	Frequent	RWT			x		x	x	x	x	x
Dichanthelium leucothrix (Nash) Freckmann	= Panicum leucothrix Nash – RAB	Poaceae	Mono	Frequent	RWT						x	x	x	x
Dichanthelium longiligulatum (Nash) Freckmann	= Panicum longiligulatum Nash – RAB	Poaceae	Mono	Occasional	RWT						x		x	x
Dichanthelium mattamuskeetense (Ashe) Mohlenbr.	< Panicum dichotomum Linnaeus – RAB	Poaceae	Mono	Occasional	RWT					x	x	x	x
Dichanthelium ovale (Elliott) Gould & C.A. Clark var. ovale	= Panicum ovale Elliott – RAB	Poaceae	Mono	Rare	RWT								x			W1	S2S3	G5T5
Dichanthelium scabriusculum (Elliott) Gould & C.A. Clark	< Panicum scabriusculum – RAB	Poaceae	Mono	Frequent	RWT							x	x	x
Dichanthelium scoparium (Lam.) Gould	= Panicum scoparium Lamarck – RAB	Poaceae	Mono	Occasional	RWT								x
Dichanthelium species 3 (= lancearium)	= Panicum lancearium Trinius – RAB	Poaceae	Mono	Occasional	RWT					x
Dichanthelium sphaerocarpon (Elliott) Gould	= Panicum sphaerocarpon Elliott – RAB	Poaceae	Mono	Infrequent	RWT									x
Dichanthelium strigosum (Muhl. ex Elliott) Freckmann var. leucoblepharis (Trin.) Freckmann	= Panicum ciliatum Elliott – RAB	Poaceae	Mono				RJL						x
Dichanthelium strigosum (Muhl. ex Elliott) Freckmann var. strigosum	< P. strigosum – RAB	Poaceae	Mono	Infrequent	RWT								x
Dichanthelium tenue (Muhl.) Freckmann & Lelong	= Panicum tenue Muhlenberg – RAB	Poaceae	Mono	Occasional	RWT					x		x	x
Dichanthelium villosissimum (Nash) Freckmann var. villosissimum	= Panicum villosissimum Nash – RAB	Poaceae	Mono	Infrequent	RWT					x				x
Dichanthelium webberianum (Nash) LeBlond		Poaceae	Mono	Occasional	RWT					x		x
Dichanthelium wrightianum (Scribn.) Freckmann	= Panicum wrightianum Scribner – RAB	Poaceae	Mono	Infrequent	RWT						x
Eragrostis elliottii S. Watson	=	Poaceae	Mono	Infrequent	RWT									x
Eragrostis refracta (Muhl. ex Elliott) Scribn.	=	Poaceae	Mono	Frequent	RWT						x	x		x
Gymnopogon brevifolius Trin.	=	Poaceae	Mono	Infrequent	RWT								x	x
Muhlenbergia capillaris (Lam.) Trin.	< M. capillaris – RAB	Poaceae	Mono	Rare	RWT									x
Muhlenbergia expansa (Poir.) Trin.	= RAB	Poaceae	Mono	Abundant	RWT								x	x
Muhlenbergia torreyana (Schult.) Hitchc.	n/a	Poaceae	Mono	Rare	RWT	Sor, RJL							x
Panicum dichotomiflorum Michx. var. puritanorum Svenson	n/a	Poaceae	Mono	Rare	RWT						x
Panicum verrucosum Muhl.	=	Poaceae	Mono	Occasional	RWT									x
Panicum virgatum L.	< P. virgatum – RAB	Poaceae	Mono	Occasional	RWT								x	x
Paspalum praecox Walter var. curtisianum (Steud.) Vasey	=	Poaceae	Mono	Occasional	RWT								x	x		W1	S2S3	G4		(status and ranks for P. praecox)
Paspalum praecox Walter var. praecox	=	Poaceae	Mono	Infrequent	RWT									x		W1	S2S3	G4		(status and ranks for P. praecox)
Paspalum setaceum Michx. var. muhlenbergii (Nash) D.J. Banks	< P. setaceum – RAB	Poaceae	Mono	Infrequent	RWT							x		x
Paspalum setaceum Michx. var. setaceum	< P. setaceum – RAB	Poaceae	Mono	Occasional	RWT					x				x
Saccharum baldwinii Spreng.	= Erianthus strictus Elliott – RAB	Poaceae	Mono	Infrequent	RWT								x	x
Saccharum coarctatum (Fernald) R.D. Webster	< Erianthus brevibarbis Michaux – RAB	Poaceae	Mono	Occasional	RWT								x
Saccharum giganteum (Walter) Pers.	= Erianthus giganteus (Walter) Palisot de Beauvois – RAB	Poaceae	Mono	Occasional	RWT								x
Schizachyrium scoparium (Michx.) Nash var. scoparium	< Andropogon scoparius Michaux – RAB	Poaceae	Mono	Frequent	RWT			x	x	x	x	x	x	x
Setaria parviflora (Poir.) Kerguélen	= S. geniculata Palisot de Beauvois – RAB	Poaceae	Mono	Infrequent	RWT									x
Sorghastrum nutans (L.) Nash	=	Poaceae	Mono	Infrequent	RWT			x	x
Sporobolus pinetorum Weakley & P.M. Peterson	>< S. teretifolius – RAB, misapplied	Poaceae	Mono	Abundant	RWT					x	x	x	x	x		W1	S3	G3
Smilax bona-nox L.	=	Smilacaceae	Mono	Rare	RWT									x
Smilax glauca Walter	=	Smilacaceae	Mono	Occasional	RWT			x			x		x	x
Smilax laurifolia L.	=	Smilacaceae	Mono	Frequent	RWT					x	x	x	x
Smilax rotundifolia L.	=	Smilacaceae	Mono	Infrequent	RWT					x
Smilax smallii Morong	=	Smilacaceae	Mono	Occasional	RWT									x
Pleea tenuifolia Michx.	=	Tofieldiaceae	Mono	Frequent	RWT					x	x	x	x	x
Tofieldia glabra Nutt.	=	Tofieldiaceae	Mono	Infrequent	RWT					x	x	x		x
Triantha racemosa (Walter) Small	= Tofieldia racemosa var. racemosa – RAB	Tofieldiaceae	Mono	Occasional	RWT						x		x	x
Xyris ambigua Beyr. ex Kunth	=	Xyridaceae	Mono	Frequent	RWT						x	x	x	x
Xyris baldwiniana Schult.	=	Xyridaceae	Mono	Rare	RWT						x
Xyris brevifolia Michx.	=	Xyridaceae	Mono	Infrequent	RWT						x	x				W1	S3	G4G5
Xyris caroliniana Walter	=	Xyridaceae	Mono	Occasional	RWT			x	x	x	x	x	x	x
Xyris curtissii Malme	=	Xyridaceae	Mono	Occasional	RWT							x	x
Xyris fimbriata Elliott	=	Xyridaceae	Mono	Infrequent	RWT						x
Xyris jupicai Rich.	= RAB	Xyridaceae	Mono				RJL
Xyris species 1	n/a	Xyridaceae	Mono	Rare	RWT						x
Viburnum nudum L.	=	Adoxaceae	Dico	Infrequent	RWT					x
Liquidambar styraciflua L.	=	Altingiaceae	Dico	Occasional	RWT				x	x	x	x	x	x
Rhus copallinum L. var. copallinum	< R. copallina – RAB	Anacardiaceae	Dico	Infrequent	RWT			x	x	x
Toxicodendron radicans (L.) Kuntze var. radicans	< Rhus radicans Linnaeus – RAB	Anacardiaceae	Dico	Infrequent	RWT					x				x
Centella erecta (L. f.) Fernald	< C. asiatica (Linnaeus) Urban – RAB	Apiaceae	Dico	Frequent	RWT								x	x
Eryngium aquaticum L. var. aquaticum	=	Apiaceae	Dico	Rare	RWT									x
Eryngium integrifolium Walter	=	Apiaceae	Dico	Occasional	RWT								x	x
Eryngium yuccifolium Michx. var. synchaetum A. Gray ex J.M. Coult. & Rose	=	Apiaceae	Dico	Infrequent	RWT								x	x		W2	S2	G5T5
Eryngium yuccifolium Michx. var. yuccifolium	=	Apiaceae	Dico	Infrequent	RWT								x	x
Oxypolis rigidior (L.) Raf.	=	Apiaceae	Dico	Rare	RWT									x
Oxypolis ternata (Nutt.) A. Heller	=	Apiaceae	Dico	Rare	RWT									x
Ptilimnium capillaceum (Michx.) Raf.	=	Apiaceae	Dico	Rare	RWT									x
Tiedemannia filiformis (Walter) Feist & S.R. Downie ssp. filiformis	=	Apiaceae	Dico	Occasional	RWT								x	x
Asclepias lanceolata Walter	=	Apocynaceae	Dico	Infrequent	RWT							x	x	x
Asclepias longifolia Michx.	=	Apocynaceae	Dico	Infrequent	RWT								x	x		W1	S2S3	G4G5
Asclepias pedicellata Walter	=	Apocynaceae	Dico	Rare	RWT					x						SR-P	S3	G4
Ilex coriacea (Pursh) Chapm.	=	Aquifoliaceae	Dico	Frequent	RWT					x	x	x
Ilex glabra (L.) A. Gray	=	Aquifoliaceae	Dico	Abundant	RWT				x	x	x	x	x	x
Ilex myrtifolia Walter	= I. cassine var. myrtifolia (Walter) Sargent – RAB	Aquifoliaceae	Dico	Occasional	RWT								x	x
Ilex opaca Aiton var. opaca	< I. opaca – RAB	Aquifoliaceae	Dico	Rare	RWT					x		x
Arnoglossum ovatum (Walter) H. Rob. var. lanceolatum (Nutt.) D.B. Ward	= Cacalia lanceolata Nuttall – RAB	Asteraceae	Dico	Rare	RWT									x		SR-P	S2	G4G5
Balduina uniflora Nutt.	=	Asteraceae	Dico	Occasional	RWT					x		x	x	x
Bigelowia nudata (Michx.) DC. var. nudata	< Chondrophora nudata (Michaux) Britton – RAB	Asteraceae	Dico	Occasional	RWT					x			x	x
Carphephorus bellidifolius (Michx.) Torr. & A. Gray	=	Asteraceae	Dico	Rare	RWT				x
Carphephorus tomentosus (Michx.) Torr. & A. Gray	= RAB	Asteraceae	Dico	Occasional	RWT				x	x	x
Chaptalia tomentosa Vent.	=	Asteraceae	Dico	Infrequent	RWT								x	x
Cirsium horridulum Michx. var. horridulum	= Carduus spinosissimus Walter – RAB	Asteraceae	Dico	Rare	RWT									x
Cirsium horridulum Michx. var. vittatum (Small) R.W. Long	= Carduus smallii (Britton) Ahles – RAB	Asteraceae	Dico	Infrequent	RWT									x
Cirsium lecontei Torr. & A. Gray	= Carduus lecontei (Torrey & A. Gray) Pollard – RAB	Asteraceae	Dico	Rare	RWT						x					SR-P	S2	G2G3
Cirsium virginianum (L.) Michx.	= Carduus virginianus Linnaeus – RAB	Asteraceae	Dico	Occasional	RWT								x	x
Coreopsis falcata F.E. Boynton	=	Asteraceae	Dico	Occasional	RWT					x	x	x	x	x
Coreopsis linifolia Nutt.	= C. angustifolia Aiton – RAB, possibly misapplied	Asteraceae	Dico	Frequent	RWT					x	x	x	x	x
Coreopsis species 1	n/a	Asteraceae	Dico	Rare	RWT									x
Elephantopus nudatus A. Gray	=	Asteraceae	Dico	Occasional	RWT				x	x
Erechtites hieraciifolius (L.) Raf. ex DC.	< E. hieracifolia – RAB	Asteraceae	Dico	Rare	RWT
Erigeron vernus (L.) Torr. & A. Gray	=	Asteraceae	Dico	Frequent	RWT						x	x	x	x
Eupatorium capillifolium (Lam.) Small	= E. capillifolium var. capillifolium – RAB	Asteraceae	Dico	Rare	RWT							x		x
Eupatorium leucolepis (DC.) Torr. & A. Gray	< E. leucolepis – RAB	Asteraceae	Dico	Frequent	RWT								x	x
Eupatorium pilosum Walter	=	Asteraceae	Dico	Occasional	RWT					x	x	x
Eupatorium recurvans Small	< E. recurvans – RAB	Asteraceae	Dico	Infrequent	RWT							x	x			W7	S1?	G3G4Q
Eupatorium rotundifolium L.	= E. rotundifolium var. rotundifolium – RAB	Asteraceae	Dico	Rare	RWT								x
Eurybia compacta G.L. Nesom	= Aster gracilis Nuttall – RAB	Asteraceae	Dico	Infrequent	RWT								x	x
Eurybia paludosa (Aiton) G.L. Nesom	= Aster paludosus Aiton – RAB	Asteraceae	Dico	Frequent	RWT						x		x	x
Euthamia caroliniana (L.) Greene ex Porter & Britton	> Solidago microcephala (Nuttall) Bush – RAB, F, G; >< Solidago tenuifolia Pursh – RAB	Asteraceae	Dico	Occasional	RWT					x		x	x	x
Helenium autumnale L.	= RAB	Asteraceae	Dico	Infrequent	RWT								x	x
Helianthus angustifolius L.	=	Asteraceae	Dico	Occasional	RWT								x	x
Helianthus heterophyllus Nutt.	=	Asteraceae	Dico	Infrequent	RWT					x			x	x
Hieracium gronovii L.	=	Asteraceae	Dico	Rare	RWT				x
Ionactis linariifolia (L.) Greene	= Aster linariifolius Linnaeus – RAB	Asteraceae	Dico	Infrequent	RWT				x	x
Liatris pilosa (Aiton) Willd.	< Liatris graminifolia Willdenow – RAB	Asteraceae	Dico	Infrequent	RWT				x	x
Liatris spicata (L.) Willd. var. resinosa (Nutt.) Gaiser	=	Asteraceae	Dico	Occasional	RWT							x	x	x
Marshallia graminifolia (Walter) Small	=	Asteraceae	Dico	Occasional	RWT						x	x	x	x
Mikania scandens (L.) Willd.	=	Asteraceae	Dico	Infrequent	RWT									x
Pityopsis graminifolia (Michx.) Nutt. var. latifolia (Fernald) Semple & F.D. Bowers	> Heterotheca nervosa (Willdenow) Shinners var. nervosa – RAB; > Heterotheca correllii (Fernald) Ahles – RAB	Asteraceae	Dico	Occasional	RWT				x	x		x	x
Pluchea foetida (L.) DC.	< P. foetida – RAB	Asteraceae	Dico	Infrequent	RWT									x
Prenanthes autumnalis Walter	=	Asteraceae	Dico	Rare	RWT								x
Pseudognaphalium obtusifolium (L.) Hilliard & Burtt	= Gnaphalium obtusifolium Linnaeus – RAB	Asteraceae	Dico	Infrequent	RWT				x
Pterocaulon pycnostachyum (Michx.) Elliott	=	Asteraceae	Dico	Occasional	RWT			x	x
Pyrrhopappus carolinianus (Walter) DC.	> P. carolinianus var. carolinianus – RAB; > P. carolinianus var. georgianus (Shinners) Ahles – RAB	Asteraceae	Dico	Occasional	RWT
Sericocarpus linifolius (L.) Britton, Sterns & Poggenb.	= Aster solidagineus Michaux – RAB	Asteraceae	Dico	Rare	RWT				x			x
Solidago gracillima Torr. & A. Gray	=	Asteraceae	Dico	Occasional	RWT								x	x		W1	S3	G4?
Solidago puberula Nutt. var. pulverulenta (Nutt.) Chapm.	=	Asteraceae	Dico	Infrequent	RWT					x			x
Solidago pulchra Small	< S. stricta – RAB	Asteraceae	Dico	Frequent	RWT						x	x	x	x		W1	S3	G3
Solidago stricta Aiton	< S. stricta – RAB (also see S. pulchra)	Asteraceae	Dico	Infrequent	RWT							x	x
Symphyotrichum dumosum (L.) G.L. Nesom	= Aster dumosus – RAB	Asteraceae	Dico	Occasional	RWT							x	x	x
Symphyotrichum walteri (Alexander) G.L. Nesom	= A. squarrosus Walter – RAB	Asteraceae	Dico	Infrequent	RWT				x	x
Trilisa odoratissima (J.F. Gmel.) Cass.	< Trilisa odoratissima (J.F. Gmelin) Cassini – RAB	Asteraceae	Dico	Frequent	RWT					x	x	x
Trilisa paniculata (J.F. Gmel.) Cass.	= RAB	Asteraceae	Dico	Infrequent	RWT					x		x
Bignonia capreolata L.	= Anisostichus capreolata (Linnaeus) Bureau – RAB	Bignoniaceae	Dico	Infrequent	RWT								x
Campsis radicans (L.) Seem. ex Bureau	= RAB	Bignoniaceae	Dico	Infrequent	RWT					x
Lobelia canbyi A. Gray	=	Campanulaceae	Dico	Frequent	RWT					x	x	x	x	x
Lobelia glandulosa Walter	=	Campanulaceae	Dico	Occasional	RWT						x		x	x
Lobelia nuttallii Schult.	=	Campanulaceae	Dico	Frequent	RWT					x	x	x	x	x
Lechea minor L.	=	Cistaceae	Dico	Rare	RWT				x
Lechea pulchella Raf. var. ramosissima (Hodgdon) Sorrie & Weakley	< L. leggettii Britton & Hollick – RAB	Cistaceae	Dico	Infrequent	RWT							x	x
Clethra alnifolia L.	= C. alnifolia var. alnifolia	Clethraceae	Dico	Occasional	RWT					x	x	x	x	x
Cuscuta gronovii Willd. ex Roem. & Schult.	=	Convolvulaceae	Dico	Rare	RWT									x
Cornus stricta Lam.	= Cornus stricta Lamarck – RAB	Cornaceae	Dico	Rare	RWT					x
Cyrilla racemiflora L.	=	Cyrillaceae	Dico	Frequent	RWT					x	x	x	x	x
Pyxidanthera barbulata Michx.	= P. barbulata var. barbulata – RAB	Diapensiaceae	Dico	Occasional	RWT					x	x	x
Dionaea muscipula J. Ellis	=	Droseraceae	Dico	Occasional	RWT						x	x	x	x		SR-L	FSC	S3	G3
Drosera brevifolia Pursh	= D. leucantha Shinners – RAB	Droseraceae	Dico	Abundant	RWT					x	x	x	x	x
Drosera capillaris Poir.	=	Droseraceae	Dico	Abundant	RWT					x	x	x	x	x
Drosera intermedia Hayne	=	Droseraceae	Dico	Frequent	RWT						x	x	x
Diospyros virginiana L.	=	Ebenaceae	Dico	Frequent	RWT			x	x	x	x	x	x	x
Eubotrys racemosa (L.) Nutt.	= Leucothoe racemosa (Linnaeus) A. Gray – RAB	Ericaceae	Dico	Occasional	RWT					x
Gaylussacia dumosa (Andrews) Torr. & A. Gray	< G. dumosa – RAB	Ericaceae	Dico	Abundant	RWT				x	x	x	x	x	x
Gaylussacia frondosa (L.) Torr. & A. Gray ex Torr.	= G. frondosa var. frondosa – RAB	Ericaceae	Dico	Abundant	RWT			x	x	x	x	x	x	x
Kalmia carolina Small	= K. angustifolia Linnaeus var. caroliniana (Small) Fernald – RAB (an orthographic error)	Ericaceae	Dico	Frequent	RWT					x	x	x
Lyonia ligustrina (L.) DC.	< L. ligustrina – RAB	Ericaceae	Dico	Frequent	RWT					x	x	x	x	x
Lyonia lucida (Lam.) K. Koch	=	Ericaceae	Dico	Frequent	RWT					x	x	x	x	x
Lyonia mariana (L.) D. Don	=	Ericaceae	Dico	Frequent	RWT					x	x	x	x	x
Rhododendron atlanticum (Ashe) Rehder	=	Ericaceae	Dico	Occasional	RWT					x	x	x
Rhododendron viscosum (L.) Torr.	> Rhododendron viscosum (Linnaeus) Torrey var. serrulatum (Small) Ahles; > Rhododendron viscosum (Linnaeus) Torrey var. viscosum	Ericaceae	Dico	Occasional	RWT					x	x	x
Vaccinium crassifolium Andrews	=	Ericaceae	Dico	Abundant	RWT					x	x	x	x	x
Vaccinium formosum Andrews	< V. corymbosum	Ericaceae	Dico	Occasional	RWT					x	x	x	x
Vaccinium fuscatum Aiton	= V. atrococcum (Gray) Heller – RAB	Ericaceae	Dico	Frequent	RWT					x	x	x	x	x
Vaccinium stamineum L.	[< V. stamineum var. stamineum – RAB	Ericaceae	Dico				RJL					x
Vaccinium tenellum Aiton	=	Ericaceae	Dico	Frequent	RWT			x	x	x	x	x	x
Zenobia pulverulenta (W. Bartram ex Willd.) Pollard	=	Ericaceae	Dico	Frequent	RWT					x	x	x
Cnidoscolus stimulosus (Michx.) Engelm. & A. Gray	=	Euphorbiaceae	Dico	Occasional	RWT			x	x	x
Euphorbia ipecacuanhae L.	=	Euphorbiaceae	Dico	Infrequent	RWT			x	x
Tragia urens L.	= RAB	Euphorbiaceae	Dico	Rare	RWT			x
Amorpha georgiana Wilbur	< A. georgiana – RAB	Fabaceae	Dico	Rare	RWT				x						FSC	E	S2	G3T2
Amorpha herbacea Walter var. herbacea	< A. herbacea – RAB	Fabaceae	Dico	Rare	RWT				x
Apios americana Medik.	=	Fabaceae	Dico	Rare	RWT					x
Centrosema virginianum (L.) Benth.	=	Fabaceae	Dico	Occasional	RWT				x
Chamaecrista nictitans (L.) Moench	< Cassia nictitans Linnaeus – RAB	Fabaceae	Dico	Infrequent	RWT									x
Desmodium tenuifolium Torr. & A. Gray	=	Fabaceae	Dico	Occasional	RWT					x		x	x	x
Galactia regularis (L.) Britton, Sterns, & Poggenb.	> G. volubilis (Linnaeus) Britton – RAB, > G. macreei M.A. Curtis – RAB	Fabaceae	Dico				RJL			x
Lespedeza angustifolia (Pursh) Elliott	=	Fabaceae	Dico	Rare	RWT				x
Lespedeza capitata Michx.	=	Fabaceae	Dico	Infrequent	RWT			x	x				x
Lespedeza hirta (L.) Hornem. var. curtissii (Clewell) Isely	< L. hirta – RAB	Fabaceae	Dico	Rare	RWT			x
Stylosanthes biflora (L.) Britton, Sterns & Poggenb.	= RAB	Fabaceae	Dico	Rare	RWT			x
Tephrosia florida (F. Dietr.) C.E. Wood	=	Fabaceae	Dico				RJL	x
Tephrosia hispidula (Michx.) Pers.	=	Fabaceae	Dico	Occasional	RWT					x			x
Quercus coccinea Münchh.	=	Fagaceae	Dico	Infrequent	RWT			x
Quercus falcata Michx.	= Q. falcata var. falcata – RAB	Fagaceae	Dico	Infrequent	RWT			x
Quercus incana W. Bartram	= RAB	Fagaceae	Dico	Infrequent	RWT			x
Quercus laurifolia Michx.	< Q. laurifolia – RAB (also see Q. hemisphaerica)	Fagaceae	Dico	Frequent	RWT					x			x	x
Quercus margarettae (Ashe) Small	= Q. margaretta – RAB	Fagaceae	Dico	Infrequent	RWT			x
Quercus marilandica Münchh. var. marilandica	< Q. marilandica – RAB	Fagaceae	Dico	Infrequent	RWT			x
Quercus nigra L.	=	Fagaceae	Dico	Occasional	RWT							x	x	x
Gelsemium sempervirens J. St.-Hil.	=	Gelsemiaceae	Dico	Occasional	RWT			x	x	x
Bartonia verna Raf. ex Barton	= RAB	Gentianaceae	Dico	Infrequent	RWT						x
Bartonia virginica (L.) Britton, Sterns & Poggenb.	=	Gentianaceae	Dico	Infrequent	RWT						x	x	x	x
Gentiana autumnalis L.	=	Gentianaceae	Dico	Occasional	RWT					x		x	x	x
Gentiana catesbaei Walter	=	Gentianaceae	Dico	Infrequent	RWT						x		x	x
Gentiana saponaria L.	=	Gentianaceae	Dico	Rare	RWT								x	x
Sabatia brachiata Elliott	=	Gentianaceae	Dico	Infrequent	RWT									x
Sabatia campanulata (L.) Torr.	=	Gentianaceae	Dico	Occasional	RWT								x	x
Sabatia difformis (L.) Druce	=	Gentianaceae	Dico	Frequent	RWT					x	x	x	x	x
Sabatia gentianoides Elliott	= RAB	Gentianaceae	Dico	Rare	RWT									x
Proserpinaca pectinata Lam.	=	Haloragaceae	Dico	Occasional	RWT
Fothergilla gardenii L.	=	Hamamelidaceae	Dico	Infrequent	RWT				x	x
Hypericum brachyphyllum (Spach) Steud.	not in RAB	Hypericaceae	Dico	Frequent	RWT	RJL					x		x	x		SR-P	S1S2	G5
Hypericum canadense L.	=	Hypericaceae	Dico	Infrequent	RWT						x	x
Hypericum cistifolium Lam.	=	Hypericaceae	Dico	Frequent	RWT					x	x	x	x	x
Hypericum crux-andreae (L.) Crantz	= H. stans (Michaux ex Willdenow) W.P. Adams & Robson – RAB	Hypericaceae	Dico	Occasional	RWT					x		x	x	x
Hypericum densiflorum Pursh	< H. densiflorum – RAB	Hypericaceae	Dico	Occasional	RWT					x	x	x		x
Hypericum denticulatum Walter	= H. denticulatum var. denticulatum – RAB	Hypericaceae	Dico	Infrequent	RWT					x			x
Hypericum galioides Lam.	=	Hypericaceae	Dico	Occasional	RWT					x		x	x	x
Hypericum gentianoides (L.) Britton, Sterns, & Poggenb.	=	Hypericaceae	Dico	Occasional	RWT					x		x		x
Hypericum gymnanthum Engelm. & A. Gray	=	Hypericaceae	Dico	Occasional	RWT					x				x
Hypericum hypericoides (L.) Crantz	=	Hypericaceae	Dico	Infrequent	RWT							x	x	x
Hypericum mutilum L. var. mutilum	< H. mutilum – RAB	Hypericaceae	Dico	Occasional	RWT							x		x
Hypericum setosum L.	= RAB	Hypericaceae	Dico	Rare	RWT					x
Hypericum tenuifolium Pursh	= H. reductum (Svenson) W.P. Adams – RAB	Hypericaceae	Dico	Occasional	RWT					x
Hyptis alata Shinners	=	Lamiaceae	Dico	Occasional	RWT								x	x
Lycopus amplectens Raf.	=	Lamiaceae	Dico	Rare	RWT									x		W1	S3	G5
Lycopus rubellus Moench	= L. rubellus var. rubellus – RAB	Lamiaceae	Dico	Rare	RWT								x
Physostegia purpurea (Walter) S.F. Blake	< Dracocephalum purpureum (Walter) McClintock ex Gleason – RAB	Lamiaceae	Dico	Infrequent	RWT								x	x
Pycnanthemum flexuosum (Walter) Britton, Sterns, & Poggenb.	=	Lamiaceae	Dico	Frequent	RWT								x	x
Pycnanthemum setosum Nutt.	=	Lamiaceae	Dico	rare	RWT					x	x	x				SR-T	S2	G4
Scutellaria integrifolia L.	> S. integrifolia var. hispida Bentham – RAB	Lamiaceae	Dico	Frequent	RWT								x	x
Persea palustris (Raf.) Sarg.	< P. borbonia – RAB	Lauraceae	Dico	Frequent	RWT					x	x	x
Sassafras albidum J. Presl	= RAB	Lauraceae	Dico	Infrequent	RWT			x	x
Pinguicula caerulea Walter	=	Lentibulariaceae	Dico	Occasional	RWT						x	x	x	x
Pinguicula pumila Michx.	=	Lentibulariaceae	Dico	Infrequent	RWT							x	x	x		SR-P	S2	G4
Utricularia juncea Vahl	=	Lentibulariaceae	Dico	Rare	RWT						x
Utricularia subulata L.	=	Lentibulariaceae	Dico	Frequent	RWT					x	x		x	x
Linum floridanum (Planch.) Trel. var. floridanum	< L. virginianum var. floridanum Planchon – RAB (also see L. floridanum var. chrysocarpum and L. intercursum	Linaceae	Dico	Occasional	RWT								x	x
Linum intercursum E.P. Bicknell	< L. virginianum var. floridanum (Planchon) – RAB	Linaceae	Dico	Infrequent	RWT							x
Linum medium (Planch.) Britton var. texanum (Planch.) Fernald	< L. virginianum var. floridanum Planchon – RAB (also see L. floridanum var. chrysocarpum and L. intercursum	Linaceae	Dico	Infrequent	RWT								x
Linum striatum Walter	=	Linaceae	Dico	Infrequent	RWT								x	x
Lindernia dubia (L.) Pennell var. anagallidea (Michx.) Cooperr.	= L. anagallidea (Michaux) Pennell – RAB	Linderniaceae	Dico	Rare	RWT					x
Mitreola petiolata (J.F. Gmel.) Torr. & A. Gray	= Cynoctonum mitreola (Linnaeus) Britton – RAB	Loganiaceae	Dico	Rare	RWT									x
Mitreola sessilifolia (J.F. Gmel.) G. Don	= Cynoctonum sessilifolium J.F. Gmelin – RAB	Loganiaceae	Dico	Infrequent	RWT									x
Magnolia virginiana L.	< M. virginiana – RAB	Magnoliaceae	Dico	Frequent	RWT					x	x	x
Rhexia alifanus Walter	=	Melastomataceae	Dico	Frequent	RWT					x	x	x	x	x
Rhexia lutea Walter	=	Melastomataceae	Dico	Occasional	RWT						x	x	x	x
Rhexia mariana L. var. exalbida Michx.	=	Melastomataceae	Dico	Occasional	RWT						x	x	x	x
Rhexia mariana L. var. mariana	=	Melastomataceae	Dico	Rare	RWT								x
Rhexia nashii Small	= R. mariana var. purpurea Michaux – RAB	Melastomataceae	Dico	Frequent	RWT					x	x	x	x
Rhexia petiolata Walter	=	Melastomataceae	Dico	Frequent	RWT					x	x	x	x
Morella caroliniensis (Mill.) Small	= Myrica heterophylla Rafinesque – FNA	Myricaceae	Dico	Frequent	RWT					x	x	x	x	x
Morella cerifera (L.) Small	= Myrica cerifera Linnaeus var. cerifera – RAB	Myricaceae	Dico	Frequent	RWT					x	x	x	x	x
Morella pumila (Michx.) Small	= Myrica cerifera Linnaeus var. pumila Michaux – RAB	Myricaceae	Dico	Frequent	RWT					x	x	x	x
Nyssa biflora Walter	= N. sylvatica Marshall var. biflora (Walter) Sargent – RAB	Nyssaceae	Dico	Occasional	RWT						x	x	x
Nyssa sylvatica		Nyssaceae	Dico				RJL			x
Fraxinus caroliniana Mill.	=	Oleaceae	Dico	Infrequent	RWT									x
Ludwigia hirtella Raf.	= RAB	Onagraceae	Dico	Infrequent	RWT								x	x
Ludwigia linearis Walter	< L. linearis – RAB	Onagraceae	Dico	Infrequent	RWT						x	x
Ludwigia maritima R.M. Harper	=	Onagraceae	Dico	Rare	RWT							x				W7	S2S3	G5
Ludwigia microcarpa Michx.	=	Onagraceae	Dico	Occasional	RWT									x
Ludwigia virgata Michx.	=	Onagraceae	Dico	Occasional	RWT								x	x
Oenothera fruticosa L. var. unguiculata Fernald	< O. fruticosa – RAB	Onagraceae	Dico	Occasional	RWT	RJL							x	x		W7	S2S3	G5TNR
Agalinis aphylla (Nutt.) Raf.	=	Orobanchaceae	Dico	Occasional	RWT						x	x	x	x		W1	S3	G3G4
Agalinis fasciculata (Elliott) Raf.	=	Orobanchaceae	Dico	Rare	RWT								x
Agalinis linifolia (Nutt.) Britton	=	Orobanchaceae	Dico	Occasional	RWT								x	x		W1	S3	G4?
Agalinis obtusifolia Raf.	=	Orobanchaceae	Dico	Infrequent	RWT								x	x		W1	S2S3	G4G5Q
Agalinis purpurea (L.) Pennell	=	Orobanchaceae	Dico	Frequent	RWT						x	x	x	x
Agalinis setacea (J.F. Gmel.) Raf.	=	Orobanchaceae	Dico				RJL			x
Seymeria cassioides (J.F. Gmel.) S.F. Blake	=	Orobanchaceae	Dico	Frequent	RWT					x	x	x	x	x
Parnassia caroliniana Michx.	=	Parnassiaceae	Dico	Frequent	RWT								x	x	FSC	E	S2	G3
Nuttallanthus canadensis (L.) D.A. Sutton	< Linaria canadensis (Linnaeus) Dumortier – RAB, W (also see N. texanus)	Plantaginaceae	Dico	Infrequent	RWT						x
Sophronanthe pilosa (Michx.) Small	= Gratiola pilosa Michaux -- RAB	Plantaginaceae	Dico	Occasional	RWT						x			x
Polygala brevifolia Nutt.	=	Polygalaceae	Dico	Infrequent	RWT						x	x	x
Polygala cruciata L. var. cruciata	< P. cruciata – RAB	Polygalaceae	Dico	Frequent	RWT							x	x	x
Polygala hookeri Torr. & A. Gray	=	Polygalaceae	Dico	Occasional	RWT								x	x		SR-T	S2S3	G3
Polygala incarnata L.	=	Polygalaceae	Dico	Occasional	RWT					x			x	x
Polygala lutea L.	=	Polygalaceae	Dico	Abundant	RWT					x	x	x	x	x
Polygala ramosa Elliott	=	Polygalaceae	Dico	Occasional	RWT								x	x
Lysimachia asperulifolia Poir.	= L. asperulaefolia – RAB	Primulaceae	Dico	rare	RWT		RJL, RWT			x	x				E	E	S3	G3
Lysimachia loomisii Torr.	=	Primulaceae	Dico	Infrequent	RWT								x			W1	S3	G3
Clematis crispa L.	=	Ranunculaceae	Dico	Infrequent	RWT									x
Thalictrum cooleyi H.E. Ahles	= RAB	Ranunculaceae	Dico	Infrequent		RJL, Sorrie								x	E	E	S2	G2
Berchemia scandens (Hill) K. Koch	=	Rhamnaceae	Dico	Infrequent	RWT									x
Amelanchier canadensis (L.) Medik.	=	Rosaceae	Dico	rare	RWT									x
Aronia arbutifolia (L.) Pers.	= Sorbus arbutifolia (Linnaeus) Heynhold var. arbutifolia – RAB	Rosaceae	Dico	Frequent	RWT						x	x	x	x
Rosa palustris Marshall	= RAB	Rosaceae	Dico	rare	RWT									x
Rubus pensilvanicus Poir.	> R. argutus Link – RAB	Rosaceae	Dico	Infrequent	RWT								x	x
Diodia teres Walter	=	Rubiaceae	Dico	Infrequent	RWT
Diodia virginiana L.	=	Rubiaceae	Dico	Frequent	RWT								x	x
Mitchella repens L.	=	Rubiaceae	Dico	Infrequent	RWT									x
Oldenlandia uniflora L.	=	Rubiaceae	Dico	Infrequent	RWT							x
Salix caroliniana Michx.	=	Salicaceae	Dico	Rare	RWT
Phoradendron serotinum (Raf.) M.C. Johnst. ssp. serotinum	< Ph. serotinum (Rafinesque) M.C. Johnston – RAB	Santalacaceae	Dico	Infrequent	RWT								x
Acer rubrum L.	< A. rubrum – RAB	Sapindaceae	Dico	Abundant	RWT					x	x	x	x	x
Sarracenia flava L.	=	Sarraceniaceae	Dico	Abundant	RWT						x	x	x	x		W5B	S3S4	G5?
Sarracenia purpurea L. ssp. venosa (Raf.) Fernald	< S. purpurea – RAB	Sarraceniaceae	Dico	Abundant	RWT						x	x	x	x
Sarracenia rubra Walter ssp. rubra	< S. rubra – RAB	Sarraceniaceae	Dico				RJL			x						W5B	S3	G4T3T4
Symplocos tinctoria (L.) L’Hér.	=	Symplocaceae	Dico	Occasional	RWT					x			x	x
Polypremum procumbens L.	=	Tetrachondraceae	Dico	Frequent	RWT							x		x
Gordonia lasianthus (L.) J. Ellis	=	Theaceae	Dico	Occasional	RWT					x	x	x
Viola brittoniana Pollard	> V. brittoniana Pollard var. brittoniana – RAB; > V. brittoniana Pollard var. pectinata (Bicknell) Alexander – RAB	Violaceae	Dico	Rare	RWT									x		W7	S2?	G4G5
Viola lanceolata L. var. lanceolata	< V. lanceolata – RAB	Violaceae	Dico	Occasional	RWT								x	x
Viola lanceolata L. var. vittata (Greene) Weath. & Griscom	< V. lanceolata – RAB	Violaceae	Dico	Infrequent	RWT								x	x
Viola primulifolia L.	=	Violaceae	Dico	Frequent	RWT						x	x	x	x
Viola sagittata Aiton var. sagittata	= V. sagittata – RAB; > V. emarginata (Nuttall) Le Conte var. marginata – RAB; > V. emarginata var. acutiloba Brainerd – RAB	Violaceae	Dico	Infrequent	RWT					x				x
Viola septemloba Leconte	< V. septemloba – RAB (also see V. esculenta)	Violaceae	Dico	Infrequent	RWT								x	x
Viola sororia Willd. var. missouriensis (Greene) L.E. McKinney	= V. affinis Le Conte – RAB	Violaceae	Dico	Occasional	RWT					x			x	x
Parthenocissus quinquefolia (L.) Planch.	=	Vitaceae	Dico	Infrequent	RWT					x				x
Vitis rotundifolia Michx. var. rotundifolia	= V. rotundifolia – RAB	Vitaceae	Dico	Infrequent	RWT								x	x
Totals								28	38	156	157	170	251	268

## Sheet: SCP taxa by comm. type graph
	PSOS-MT	MPS-CP	WPF-T	SPS-T	SPS-RF	WLPS	VWLPS
total	28	38	156	156	170	250	267
rare taxa	0	2	10	23	17	34	41
non-rare taxa	28	36	146	133	153	216	226
percent rare taxa	0	0.0526316	0.0641026	0.147436	0.1	0.136	0.153558

## Sheet: Habit analysis
SCP only						SR + V only
	herbs	vines	trees/shrubs	totals		herbs	vines	trees/shrubs	totals
Cyperaceae	55	0	0	55		62	0	0	62
Juncaceae	16	0	0	16		15	0	0	15
Orchidaceae	14	0	0	14		15	0	0	15
Poaceae	73	0	0	73		57	0	0	57
Xyridaceae	8	0	0	8		10	0	0	10
Apiaceae	9	0	0	9		10	0	0	10
Asteraceae	47	1	0	48		63	1	1	65
Ericaceae	0	0	15	15		0	0	17	17
Fabaceae	8	3	2	13		16	3	1	20
Fagaceae	0	7	7	14		0	0	7	7
Hypericaceae	6	0	7	13		4	0	7	11
Smilacaceae	0	5	0	5		0	4	0	4
Myricaceae	0	0	3	3		0	0	3	3
Pinaceae	0	0	4	4		0	0	3	3
Aquifoliaceae	0	0	4	4		0	0	4	4
Rosaceae	0	0	4	4		0	0	7	7
	Cyperaceae	Juncaceae	Orchidaceae	Poaceae	Xyridaceae	Apiaceae	Asteraceae	Ericaceae	Fabaceae	Fagaceae	Hypericaceae	Smilacaceae	Myricaceae	Pinaceae	Aquifoliaceae	Rosaceae	Totals		Other families
SCP herbs	55	16	14	73	8	9	47	0	8	0	6	0	0	0	0	0	236	362	126
SR+V herbs	62	15	15	57	10	10	63	0	16	0	4	0	0	0	0	0	252	379	127
SCP vines	0	0	0	0	0	0	1	0	3	0	0	5	0	0	0	0	9	19	10
SR+V vines	0	0	0	0	0	0	1	0	3	0	0	4	0	0	0	0	8	19	11
SCP trees/shrubs	0	0	0	0	0	0	0	15	2	7	7	0	3	4	4	4	46	69	23
SR+V trees/shrubs	0	0	0	0	0	0	1	17	1	7	7	0	3	3	4	7	50	76	26
	SCP herbs	SR+V herbs	SCP vines	SR+V vines	SCP trees/shrubs	SR+V trees/shrubs
Cyperaceae	55	62	0	0	0	0
Juncaceae	16	15	0	0	0	0
Orchidaceae	14	15	0	0	0	0
Poaceae	73	57	0	0	0	0
Xyridaceae	8	10	0	0	0	0
Apiaceae	9	10	0	0	0	0
Asteraceae	47	63	1	1	0	1
Ericaceae	0	0	0	0	15	17
Fabaceae	8	16	3	3	2	1
Fagaceae	0	0	7	0	7	7
Hypericaceae	6	4	0	0	7	7
Smilacaceae	0	0	5	4	0	0
Myricaceae	0	0	0	0	3	3
Pinaceae	0	0	0	0	4	3
Aquifoliaceae	0	0	0	0	4	4
Rosaceae	0	0	0	0	4	7
HERBS
	Poaceae	Cyperaceae	Asteraceae	Juncaceae	Orchidaceae	Fabaceae	Xyridaceae	Apiaceae	Gentianaceae	Other families
SCP herbs	71	54	47	16	15	8	8	9	9	125	362
SR+V herbs	57	62	63	15	15	16	10	10	9	122	379
Either SCP or SR+V herbs	81	72	66	18	18	18	12	10	10	142	447
TOTALS
VINES
	Smilacaceae	Fabaceae	Bignoniaceae	Vitaceae	Anacardiaceae	Asteraceae	Convolvulaceae	Dioscoreaceae	Gelsemiaceae	Ranunculaceae	Rhamnaceae	Caprifoliaceae
SCP vines	5	3	2	2	1	1	1	1	1	1	1	0
SR+V vines	4	3	2	2	1	1	1	1	1	1	1	1
TOTALS	9	6	4	4	2	2	2	2	2	2	2	1
TREES & SHRUBS
	Ericaceae	Fagaceae	Hypericaceae	Rosaceae	Aquifoliaceae	Pinaceae	Cuppressaceae	Myricaceae	Lauraceae	Fabaceae	Nyssaceae	Totals		Other families
SCP trees & shrubs	15	7	7	4	4	4	3	3	2	2	1	52	69	17
SR+V trees & shrubs	17	7	7	7	4	3	3	3	2	1	2	56	76	20
TOTALS	32	14	14	11	8	7	6	6	4	3	3	108
SCP herbs	364
SR+V herbs	379
SCP vines	19
SR+V vines	19
SCP trees & shrubs	69
SR+V trees & shrubs	76
