# Supplementary material for: Guide to the Vascular Flora of the Savannas and Flatwoods of Shaken Creek Preserve and Vicinity (Pender & Onslow Counties, North Carolina, U.S.A.)
Source: Biodivers Data J. 2014 May 16;(2):e1099. doi: 10.3897/BDJ.2.e1099 (PMC4107865; doi:10.3897/BDJ.2.e1099)
Supplement: Supplementary material 6 — List of Voucher Specimens Collected by the Senior Author [file biodiversity_data_journal-2-e1099-s006.xls]

## Sheet: Collection List
institutionCode	scientificName	Family	Clade	nameAccordingTo	Country	stateProvince	County	verbatimLocality	habitat	occurrenceRemarks	Elevation	verbatimLatitude	verbatimLongitude	coordinateUncertaintyInMeters	recordedBy	recordNumber	day	month	year		Tissue sample collected (Y=yes)	Location Detail (these are supplemental location notes…refer to "verbatimLocation" column for additional details.
NCSC	Asplenium platyneuron (L.) Britton, Sterns, & Poggenb.	Aspleniaceae	F + FA	sensu Weakley 2012	U.S.A.	NC	Pender	around dog pens on Williams Road, approximately .25 km southwest of hunting lodge	weedy roadside	occasional	8 m. msl	34deg.35'52.9" N	77deg.40'7.3" W	20	Robert Thornhill	1442	11	7	2012			around dog pens on Williams Road
NCSC	Woodwardia areolata (L.) Moor	Blechnaceae	F + FA	sensu Weakley 2012	U.S.A.	NC	Pender	in savanna immediately south of Flo Road, approximately 0.3km east of intersection of Flo Road and Fill Road	Wet Loamy Pine Savanna (sensu Schafale 2012)	frequent	8 m. msl	34deg.34'56.3" N	77deg.38'48.6" W	50	Robert Thornhill	876	12	8	2011
NCSC	Woodwardia areolata (L.) Moor	Blechnaceae	F + FA	sensu Weakley 2012	U.S.A.	NC	Pender	in large savanna immediately south of intersection of Flo Road and Fill Road	Wet Loamy Pine Savanna (sensu Schafale 2012)	occasional	8 m. msl	34deg.34'54.7" N	77deg.39'9.0" W	100	Robert Thornhill	752	3	8	2011		y
NCSC	Woodwardia virginica (L.) Sm.	Blechnaceae	F + FA	sensu Weakley 2012	U.S.A.	NC	Pender	in pine savannas along Flo Road, approximately 0.4-1.2 km southeast of junction with Half Moon Road	Sandy Pine Savanna (Rush Featherling subtype) sensu Schafale 2012	frequent	9 m. msl	34deg.35'11.9" N	77deg.39'45.9" W	400	Robert Thornhill	597	14	7	2011
NCSC	Woodwardia virginica (L.) Sm.	Blechnaceae	F + FA	sensu Weakley 2012	U.S.A.	NC	Pender	in pine savannas along Flo Road, approximately 0.4-1.2 km southeast of junction with Half Moon Road	Sandy Pine Savanna (Rush Featherling subtype) sensu Schafale 2012	frequent	9 m. msl	34deg.35'11.9" N	77deg.39'45.9" W	400	Robert Thornhill	798	4	8	2011
NCSC	Woodwardia virginica (L.) Sm.	Blechnaceae	F + FA	sensu Weakley 2012	U.S.A.	NC	Pender	in savanna on east side of Alligator Lake Road, immediately south of junction with Flo Road	Very Wet Loamy Pine Savanna (sensu Schafale 2012)		8 m. msl	34deg.34'54.2" N	77deg.38'38.5" W	50	Robert Thornhill	570	28	6	2011		y
NCSC	Woodwardia virginica (L.) Sm.	Blechnaceae	F + FA	sensu Weakley 2012	U.S.A.	NC	Pender	in large savanna immediately south of intersection of Flo Road and Fill Road	Wet Loamy Pine Savanna (sensu Schafale 2012)	frequent	8 m. msl	34deg.34'54.7" N	77deg.39'9.0" W	100	Robert Thornhill	616	14	7	2011		y
NCSC	Pteridium aquilinum (L.) Kuhn var. pseudocaudatum (Clute) A. Heller	Dennstaedtiaceae	F + FA	sensu FNA	U.S.A.	NC	Pender	in small pine savanna on south side of Flo Road, approximately .1 km west of junction with Alligator Lake Road	Very Wet Loamy Pine Savanna (sensu Schafale 2012)	occasional	8 m. msl	34deg.34'58.0" N	77deg.38'41.0" W	20	Robert Thornhill	836	12	8	2011
NCSC	Pteridium aquilinum (L.) Kuhn var. pseudocaudatum (Clute) A. Heller	Dennstaedtiaceae	F + FA	sensu FNA	U.S.A.	NC	Pender	in Spodosol savanna on east side of Half Moon Road, 0.5-1.5 km southwest of intersection of Half Moon Road and Flo Road	Sandy Pine Savanna (Typic subtype) sensu Schafale 2012	frequent	9 m. msl	34deg.35'15.7" N	77deg.40'16.0" W	500	Robert Thornhill	1425	19	6	2012			in savanna along east side of Half Moon Road, approximately .5 mi south of intersection with Flo Road
NCSC	Pteridium aquilinum (L.) Kuhn var. pseudocaudatum (Clute) A. Heller	Dennstaedtiaceae	F + FA	sensu FNA	U.S.A.	NC	Pender	in large savanna immediately south of intersection of Flo Road and Fill Road	Wet Loamy Pine Savanna (sensu Schafale 2012)	infrequent	8 m. msl	34deg.34'54.7" N	77deg.39'9.0" W	100	Robert Thornhill	1452	26	7	2012
NCSC	Lycopodiella alopecuroides (L.) Cranfill	Lycopodiaceae	F + FA	sensu Weakley 2012	U.S.A.	NC	Pender	in savanna on east side of Alligator Lake Road, immediately south of junction with Flo Road	Very Wet Loamy Pine Savanna (sensu Schafale 2012)		8 m. msl	34deg.34'54.2" N	77deg.38'38.5" W	50	Robert Thornhill	850	12	8	2011
NCSC	Lycopodiella alopecuroides (L.) Cranfill	Lycopodiaceae	F + FA	sensu Weakley 2012	U.S.A.	NC	Pender	in large savanna immediately south of intersection of Flo Road and Fill Road	Wet Loamy Pine Savanna (sensu Schafale 2012)		8 m. msl	34deg.34'54.7" N	77deg.39'9.0" W	100	Robert Thornhill	785	3	8	2011
NCSC	Lycopodiella alopecuroides (L.) Cranfill	Lycopodiaceae	F + FA	sensu Weakley 2012	U.S.A.	NC	Pender	in savanna immediately south of Flo Road, approximately 0.3km east of intersection of Flo Road and Fill Road	Wet Loamy Pine Savanna (sensu Schafale 2012)	frequent	8 m. msl	34deg.34'56.3" N	77deg.38'48.6" W	50	Robert Thornhill	232	21	7	2011
NCSC	Lycopodiella appressa (Chapm.) Cranfill	Lycopodiaceae	F + FA	sensu Weakley 2012	U.S.A.	NC	Pender	in savanna on east side of Alligator Lake Road, immediately south of junction with Flo Road	Very Wet Loamy Pine Savanna (sensu Schafale 2012)		8 m. msl	34deg.34'54.2" N	77deg.38'38.5" W	50	Robert Thornhill	851	12	8	2011
NCSC	Lycopodiella appressa (Chapm.) Cranfill	Lycopodiaceae	F + FA	sensu Weakley 2012	U.S.A.	NC	Pender	in Spodosol savanna on east side of Half Moon Road, 0.5-1.5 km southwest of intersection of Half Moon Road and Flo Road	Sandy Pine Savanna (Typic subtype) sensu Schafale 2012		9 m. msl	34deg.35'15.7" N	77deg.40'16.0" W	500	Robert Thornhill	810	4	8	2011
NCSC	Pseudolycopodiella caroliniana (L.) Holub	Lycopodiaceae	F + FA	sensu Weakley 2012	U.S.A.	NC	Pender	in pine savannas along Flo Road, approximately 0.4-1.2 km southeast of junction with Half Moon Road	Sandy Pine Savanna (Rush Featherling subtype) sensu Schafale 2012	occasional	9 m. msl	34deg.35'11.9" N	77deg.39'45.9" W	400	Robert Thornhill	958	26	8	2011
NCSC	Pseudolycopodiella caroliniana (L.) Holub	Lycopodiaceae	F + FA	sensu Weakley 2012	U.S.A.	NC	Pender	in large savanna immediately south of intersection of Flo Road and Fill Road	Wet Loamy Pine Savanna (sensu Schafale 2012)	occasional	8 m. msl	34deg.34'54.7" N	77deg.39'9.0" W	100	Robert Thornhill	758	3	8	2011		y
NCSC	Ophioglossum pycnostichum (Fernald) Á. Löve & D. Löve	Ophioglossaceae	F + FA	sensu Weakley 2012	U.S.A.	NC	Pender	in moist lawn on east side of hunting lodge on Williams Road	moist, shady lawn	rare	8 m. msl	34deg.35'57.5" N	77deg.39'58.0" W	5	Robert Thornhill	1420	19	6	2012			in moist lawn on east side of hunting lodge on Williams Road
NCSC	Osmunda spectabilis Willd.	Osmundaceae	F + FA	sensu Weakley 2012	U.S.A.	NC	Pender	in pine savannas along Flo Road, approximately 0.4-1.2 km southeast of junction with Half Moon Road	Sandy Pine Savanna (Rush Featherling subtype) sensu Schafale 2012		9 m. msl	34deg.35'11.9" N	77deg.39'45.9" W	400	Robert Thornhill	300	15	5	2011
NCSC	Osmunda spectabilis Willd.	Osmundaceae	F + FA	sensu Weakley 2012	U.S.A.	NC	Pender	in large savanna immediately south of intersection of Flo Road and Fill Road	Wet Loamy Pine Savanna (sensu Schafale 2012)		8 m. msl	34deg.34'54.7" N	77deg.39'9.0" W	100	Robert Thornhill	202	1	5	2011
NCSC	Osmunda spectabilis Willd.	Osmundaceae	F + FA	sensu Weakley 2012	U.S.A.	NC	Pender	in large savanna immediately south of intersection of Flo Road and Fill Road	Wet Loamy Pine Savanna (sensu Schafale 2012)		8 m. msl	34deg.34'54.7" N	77deg.39'9.0" W	100	Robert Thornhill	202	1	5	2011
NCSC	Osmundastrum cinnamomeum (L.) C. Presl	Osmundaceae	F + FA	sensu Weakley 2012	U.S.A.	NC	Pender	in savanna .18 km south of Flo Road at a point approximately 0.3km east of intersection of Flo Road and Fill Road	Very Wet Loamy Pine Savanna (sensu Schafale 2012)		8 m. msl	34deg.34'50.5" N	77deg.38'46.6" W	50	Robert Thornhill	223	1	5	2011
NCSC	Osmundastrum cinnamomeum (L.) C. Presl	Osmundaceae	F + FA	sensu Weakley 2012	U.S.A.	NC	Pender	in Spodosol savanna on east side of Half Moon Road, 0.5-1.5 km southwest of intersection of Half Moon Road and Flo Road	Sandy Pine Savanna (Typic subtype) sensu Schafale 2012		9 m. msl	34deg.35'15.7" N	77deg.40'16.0" W	500	Robert Thornhill	255	15	5	2011
NCSC	Osmundastrum cinnamomeum (L.) C. Presl	Osmundaceae	F + FA	sensu Weakley 2012	U.S.A.	NC	Pender	in large savanna immediately south of intersection of Flo Road and Fill Road	Wet Loamy Pine Savanna (sensu Schafale 2012)		8 m. msl	34deg.34'54.7" N	77deg.39'9.0" W	100	Robert Thornhill	201	1	5	2011		y
NCSC	Pleopeltis polypodioides (L.) E.G. Andrews & Windham var. michauxiana (Weath.) E.G. Andrews & Windham	Polypodiaceae	F + FA	sensu Weakley 2012	U.S.A.	NC	Pender	in trees along north side of Flo Road, approximately 1.0 km east of junction with Alligator Lake Road	swamp forest	infrequent	8 m. msl	34deg.34'50.0" N	77deg.37'59.0" W	100	Robert Thornhill	1408	15	6	2012			just north of Williams Road, approximately .75 mi east of intersection with Alligator Lake Road
NCSC	Selaginella apoda (L.) C. Morren	Selaginellaceae	F + FA	sensu Weakley 2012	U.S.A.	NC	Pender	in swamp on south side of Flo Road, approximately 1.2 km east of junction with Alligator Lake Road	swamp forest	occasional	8 m. msl	34deg.34'50.0" N	77deg.37'59.0" W	100	Robert Thornhill	1480	26	7	2012			in swamp on south side of Flo Road, approximately 1 mi east of intersection with Alligator Lake Road
NCSC	Juniperus virginiana L. var. virginiana	Cuppressaceae	Gymnosperms	sensu Weakley 2012	U.S.A.	NC	Pender	thicket along east side of Flo Road, approximately .12 km south of hunting lodge	roadside	rare	8 m. msl	34deg.35'55.7" N	77deg.40'3.3" W	5	Robert Thornhill	1381	11	6	2012			along east side of Williams Road, approximately .1 mi south of hunting lodge
NCSC	Taxodium ascendens Brongn.	Cuppressaceae	Gymnosperms	sensu Weakley 2012	U.S.A.	NC	Pender	in large savanna immediately south of intersection of Flo Road and Fill Road	Wet Loamy Pine Savanna (sensu Schafale 2012)	frequent in wet depressions	8 m. msl	34deg.34'54.7" N	77deg.39'9.0" W	100	Robert Thornhill	474	9	6	2011		y
NCSC	Taxodium distichum (L.) Rich.	Cuppressaceae	Gymnosperms	sensu Weakley 2012	U.S.A.	NC	Pender	in Shaken Creek swamp, about .4 km southwest of end of Half Moon Road	Coastal Plain Small Stream Swamp sensu Schafale 2012	infrequent	7 m. msl	34deg.34'30.7" N	77deg.40'29.6" W	400	Robert Thornhill	1386	15	6	2012			in Shaken Creek swamp, about .3 mi southwest of end of Half Moon Road
NCSC	Chamaecyparis thyoides (L.) Britton, Sterns & Poggenb	Cupressaceae	Gymnosperms	sensu Weakley 2012	U.S.A.	NC	Pender	in large savanna immediately south of intersection of Flo Road and Fill Road	Wet Loamy Pine Savanna (sensu Schafale 2012)	rare	8 m. msl	34deg.34'54.7" N	77deg.39'9.0" W	100	Robert Thornhill	757	3	8	2011		y
NCSC	Pinus elliottii Engelm. var. elliottii	Pinaceae	Gymnosperms	sensu Weakley 2012	U.S.A.	NC	Pender	on west side of Indian Grave Road, approximately .2 km south of junction with Williams Road	Wet Pine Flatwoods (Typic subtype ) sensu Schafale 2012	stand planted by timber company prior to site's purchase by TNC	9 m. msl	34deg.35'11.9" N	77deg.41'3.3" W	50	Robert Thornhill	1554	14	9	2012		y	on Indian Grave Road
NCSC	Pinus palustris Mill.	Pinaceae	Gymnosperms	sensu Weakley 2012	U.S.A.	NC	Pender	in pine savannas along Flo Road, approximately 0.4-1.2 km southeast of junction with Half Moon Road	Sandy Pine Savanna (Rush Featherling subtype) sensu Schafale 2012	occasional	9 m. msl	34deg.35'11.9" N	77deg.39'45.9" W	400	Robert Thornhill	1066	9	9	2011
NCSC	Pinus palustris Mill.	Pinaceae	Gymnosperms	sensu Weakley 2012	U.S.A.	NC	Pender	in savanna on east side of Alligator Lake Road, immediately south of junction with Flo Road	Very Wet Loamy Pine Savanna (sensu Schafale 2012)	infrequent	8 m. msl	34deg.34'54.2" N	77deg.38'38.5" W	50	Robert Thornhill	1069	9	9	2011
NCSC	Pinus palustris Mill.	Pinaceae	Gymnosperms	sensu Weakley 2012	U.S.A.	NC	Pender	in Spodosol savanna on east side of Half Moon Road, 0.5-1.5 km southwest of intersection of Half Moon Road and Flo Road	Sandy Pine Savanna (Typic subtype) sensu Schafale 2012	occasional	9 m. msl	34deg.35'15.7" N	77deg.40'16.0" W	500	Robert Thornhill	1068	9	9	2011
NCSC	Pinus palustris Mill.	Pinaceae	Gymnosperms	sensu Weakley 2012	U.S.A.	NC	Pender	in savanna immediately south of Flo Road, approximately 0.3km east of intersection of Flo Road and Fill Road	Wet Loamy Pine Savanna (sensu Schafale 2012)	occasional	8 m. msl	34deg.34'56.3" N	77deg.38'48.6" W	50	Robert Thornhill	1067	9	9	2011
NCSC	Pinus serotina Michx.	Pinaceae	Gymnosperms	sensu Weakley 2012	U.S.A.	NC	Pender	in large savanna immediately south of intersection of Flo Road and Fill Road	Wet Loamy Pine Savanna (sensu Schafale 2012)	occasional	8 m. msl	34deg.34'54.7" N	77deg.39'9.0" W	100	Robert Thornhill	472	9	6	2011		y
NCSC	Pinus serotina Michx.	Pinaceae	Gymnosperms	sensu Weakley 2012	U.S.A.	NC	Pender	in large savanna immediately south of intersection of Flo Road and Fill Road	Wet Loamy Pine Savanna (sensu Schafale 2012)	occasional	8 m. msl	34deg.34'54.7" N	77deg.39'9.0" W	100	Robert Thornhill	472	9	6	2011		y
NCSC	Pinus taeda L.	Pinaceae	Gymnosperms	sensu Weakley 2012	U.S.A.	NC	Pender	in savanna on east side of Alligator Lake Road, immediately south of junction with Flo Road	Very Wet Loamy Pine Savanna (sensu Schafale 2012)	occasional	8 m. msl	34deg.34'54.2" N	77deg.38'38.5" W	50	Robert Thornhill	1026	2	9	2011		y
NCSC	Pinus taeda L.	Pinaceae	Gymnosperms	sensu Weakley 2012	U.S.A.	NC	Pender	in large savanna immediately south of intersection of Flo Road and Fill Road	Wet Loamy Pine Savanna (sensu Schafale 2012)	infrequent	8 m. msl	34deg.34'54.7" N	77deg.39'9.0" W	100	Robert Thornhill	471	9	6	2011		y
NCSC	Pinus taeda L.	Pinaceae	Gymnosperms	sensu Weakley 2012	U.S.A.	NC	Pender	in large savanna immediately south of intersection of Flo Road and Fill Road	Wet Loamy Pine Savanna (sensu Schafale 2012)	occasional	8 m. msl	34deg.34'54.7" N	77deg.39'9.0" W	100	Robert Thornhill	1028	2	9	2011
NCSC	Pinus taeda L.	Pinaceae	Gymnosperms	sensu Weakley 2012	U.S.A.	NC	Pender	in savanna immediately south of Flo Road, approximately 0.3km east of intersection of Flo Road and Fill Road	Wet Loamy Pine Savanna (sensu Schafale 2012)	infrequent	8 m. msl	34deg.34'56.3" N	77deg.38'48.6" W	50	Robert Thornhill	1027	2	9	2011
NCSC	Hexastylis arifolia (Michx.) Small var. arifolia	Aristolochiaceae	Basal Angiosperms	sensu Weakley 2012	U.S.A.	NC	Pender	in moist woods on west end of food plot at end of Meadow Lake Road	moist woods	rare	8 m. msl	34deg.34'52.7" N	77deg.39'49.3" W	100	Robert Thornhill	1457	26	7	2012			in woods on west end of food plot on Meadow Lake Road
NCSC	Persea palustris (Raf.) Sarg.	Lauraceae	Basal Angiosperms	sensu Weakley 2012	U.S.A.	NC	Pender	in pine savannas along Flo Road, approximately 0.4-1.2 km southeast of junction with Half Moon Road	Sandy Pine Savanna (Rush Featherling subtype) sensu Schafale 2012	frequent	9 m. msl	34deg.35'11.9" N	77deg.39'45.9" W	400	Robert Thornhill	497	10	6	2011		y
NCSC	Persea palustris (Raf.) Sarg.	Lauraceae	Basal Angiosperms	sensu Weakley 2012	U.S.A.	NC	Pender	in Spodosol savanna on east side of Half Moon Road, 0.5-1.5 km southwest of intersection of Half Moon Road and Flo Road	Sandy Pine Savanna (Typic subtype) sensu Schafale 2012	frequent	9 m. msl	34deg.35'15.7" N	77deg.40'16.0" W	500	Robert Thornhill	542	21	6	2011
NCSC	Sassafras albidum J. Presl	Lauraceae	Basal Angiosperms	sensu Weakley 2012	U.S.A.	NC	Pender	just south of Indian Grave Road, approximately .3 km southeast of junction of Indian Grave Road and powerline cut	Mesic Pine Savanna (Coastal Plain subtype) sensu Schafale 2012	infrequent	10 m. msl	34deg.34'55.3" N	77deg.41'14.2" W	50	Robert Thornhill	1534	28	8	2012			just south of Indian Grave Road, approximately .2 mi southeast of junction of Indian Grave Road and powerline cut
NCSC	Magnolia virginiana L.	Magnoliaceae	Basal Angiosperms	sensu FNA	U.S.A.	NC	Pender	in pine savannas along Flo Road, approximately 0.4-1.2 km southeast of junction with Half Moon Road	Sandy Pine Savanna (Rush Featherling subtype) sensu Schafale 2012		9 m. msl	34deg.35'11.9" N	77deg.39'45.9" W	400	Robert Thornhill	235	6	5	2011		y
NCSC	Magnolia virginiana L.	Magnoliaceae	Basal Angiosperms	sensu FNA	U.S.A.	NC	Pender	in pine savannas along Flo Road, approximately 0.4-1.2 km southeast of junction with Half Moon Road	Sandy Pine Savanna (Rush Featherling subtype) sensu Schafale 2012		9 m. msl	34deg.35'11.9" N	77deg.39'45.9" W	400	Robert Thornhill	235	6	5	2011		y
NCSC	Magnolia virginiana L.	Magnoliaceae	Basal Angiosperms	sensu FNA	U.S.A.	NC	Pender	in Spodosol savanna on east side of Half Moon Road, 0.5-1.5 km southwest of intersection of Half Moon Road and Flo Road	Sandy Pine Savanna (Typic subtype) sensu Schafale 2012		9 m. msl	34deg.35'15.7" N	77deg.40'16.0" W	500	Robert Thornhill	263	15	5	2011
NCSC	Nymphaea odorata Aiton ssp. odorata	Nymphaeaceae	Basal Angiosperms	sensu Weakley 2012	U.S.A.	NC	Pender	in pond along Bug Ridge Road, .8 km east of intersection with Williams Road	small pond (permanently water-filled borrow pit)	occasional	8 m. msl	34deg.35'53.0" N	77deg.39'38.0" W	50	Robert Thornhill	1417	19	6	2012			in pond along Bug Ridge Road, .5 mi east of intersection with Williams Road
NCSC	Saururus cernuus L.	Saururaceae	Basal Angiosperms	sensu Weakley 2012	U.S.A.	NC	Pender	around dog pens on Williams Road, approximately .25 km southwest of hunting lodge	weedy roadside	occasional	8 m. msl	34deg.35'52.9" N	77deg.40'7.3" W	20	Robert Thornhill	1334	3	6	2012			around dog pens on Williams Road
NCSC	Yucca filamentosa L.	Agavaceae	Monocots	sensu Weakley 2012	U.S.A.	NC	Pender	in flatwoods/savanna approximately 80 meters north of intersection of Alligator Lake Road and Flo Road, just east of food plot	Mesic Pine Savanna (Coastal Plain subtype) sensu Schafale 2012	infrequent	9 m. msl	34deg.35'0.8" N	77deg.38'37.7" W	50	Robert Thornhill	1011	2	9	2011
NCSC	Allium species 1	Amaryllidaceae	Monocots	sensu Weakley 2012	U.S.A.	NC	Pender		Very Wet Loamy Pine Savanna (sensu Schafale 2012)	occasional					Robert Thornhill	1009	2	9	2011
NCSC	Allium species 1	Amaryllidaceae	Monocots	sensu Weakley 2012	U.S.A.	NC	Pender		Very Wet Loamy Pine Savanna (sensu Schafale 2012)	occasional					Robert Thornhill	839	12	8	2011		y
NCSC	Arisaema pusillum Nash	Araceae	Monocots	sensu Weakley 2012	U.S.A.	NC	Pender	in swamp on south side of Flo Road, approximately 1.2 km east of junction with Alligator Lake Road	swamp forest	occasional	8 m. msl	34deg.34'50.0" N	77deg.37'59.0" W	100	Robert Thornhill	1488	26	7	2012			in swamp on south side of Flo Road, approximately 1 mi east of intersection with Alligator Lake Road
NCSC	Sabal minor (Jacq.) Pers.	Arecaceae	Monocots	sensu Weakley 2012	U.S.A.	NC	Pender	in swamp on south side of Flo Road, approximately 1.2 km east of junction with Alligator Lake Road	swamp forest	occasional	8 m. msl	34deg.34'50.0" N	77deg.37'59.0" W	100	Robert Thornhill	1484	26	7	2012		y	in swamp on south side of Flo Road, approximately 1 mi east of intersection with Alligator Lake Road
NCSC	Tillandsia usneoides (L.) L.	Bromeliaceae	Monocots	sensu Weakley 2012	U.S.A.	NC	Pender	in savanna .18 km south of Flo Road at a point approximately 0.3km east of intersection of Flo Road and Fill Road	Very Wet Loamy Pine Savanna (sensu Schafale 2012)	rare	8 m. msl	34deg.34'50.5" N	77deg.38'46.6" W	50	Robert Thornhill	190	1	5	2011
NCSC	Tillandsia usneoides (L.) L.	Bromeliaceae	Monocots	sensu Weakley 2012	U.S.A.	NC	Pender	in savanna .18 km south of Flo Road at a point approximately 0.3km east of intersection of Flo Road and Fill Road	Very Wet Loamy Pine Savanna (sensu Schafale 2012)	rare	8 m. msl	34deg.34'50.5" N	77deg.38'46.6" W	50	Robert Thornhill	190	1	5	2011
NCSC	Burmannia capitata (Walter ex J.F. Gmel.) Mart.	Burmanniaceae	Monocots	sensu Weakley 2012	U.S.A.	NC	Pender	around borrow pits on west side of Williams Road, approx .5 km north of Shaken Creek	wet sandy margin of borrow pits	infrequent	8 m. msl	34deg.35'9.6" N	77deg.41'17.1" W	5	Robert Thornhill	1472	26	7	2012			around borrow pits on west side of Williams Road, approx .3 mi north of Shaken Creek
NCSC	Commelina communis L.	Commelinaceae	Monocots	sensu Weakley 2012	U.S.A.	NC	Pender	around front porch of hunting lodge on Williams Road, just south of Shelter Swamp Creek	moist lawn	infrequent	8 m. msl	34deg.35'57.5" N	77deg.39'58.8" W	5	Robert Thornhill	1498	3	8	2012			around hunting lodge on Williams Road, just south of Shelter Swamp Creek
NCSC	Bulbostylis ciliatifolia (Elliott) Fernald	Cyperaceae	Monocots	sensu Weakley 2012	U.S.A.	NC	Pender	along Alligator Lake Road, 0-0.4 km south of junction with Flo Road	sandy roadside margin, adjacent to pine savanna		8 m. msl	34deg.34'54.5" N	77deg.38'39.9" W	200	Robert Thornhill	754	2	5	2012
NCSC	Carex albolutescens Schwein.	Cyperaceae	Monocots	sensu Weakley 2012	U.S.A.	NC	Pender	along Flo Road at junction with powerline cut	sandy roadside	occasional	8 m. msl	34deg.35'46.6" N	77deg.40'10.2" W	5	Robert Thornhill	1414	19	6	2012			along Flo Road at junction with powerline cut
NCSC	Carex albolutescens Schwein.	Cyperaceae	Monocots	sensu Weakley 2012	U.S.A.	NC	Pender	around dog pens on Williams Road, approximately .25 km southwest of hunting lodge	weedy roadside	occasional	8 m. msl	34deg.35'52.9" N	77deg.40'7.3" W	20	Robert Thornhill	1333	3	6	2012			around dog pens on Williams Road
NCSC	Carex albolutescens Schweinitz	Cyperaceae	Monocots	sensu Weakley 2012	U.S.A.	NC	Pender	around hunting lodge on Williams Road, just south of Shelter Swamp Creek	moist lawn	occasional	8 m. msl	34deg.35'57.5" N	77deg.39'58.8" W	5	Robert Thornhill	1447	19	7	2012			by hunting lodge along Williams Road
NCSC	Carex atlantica L.H. Bailey	Cyperaceae	Monocots	sensu Weakley 2012	U.S.A.	NC	Pender	in powerline right-of-way, approximately .25 km north of Shaken Creek	boggy savanna in powerline right-of-way	infrequent	6 m. msl	34deg.34'51.4" N	77deg.41'25.7" W	20	Robert Thornhill	1398	15	6	2012			in powerline cut, approximately .3 mi north of Shaken Creek
NCSC	Carex atlantica L.H. Bailey	Cyperaceae	Monocots	sensu Weakley 2012	U.S.A.	NC	Pender	in powerline right-of-way, approximately .25 km north of Shaken Creek	boggy savanna in powerline right-of-way	infrequent	6 m. msl	34deg.34'51.4" N	77deg.41'25.7" W	20	Robert Thornhill	1398	15	6	2012			in powerline cut, approximately .3 mi north of Shaken Creek
NCSC	Carex debilis Michx.	Cyperaceae	Monocots	sensu Weakley 2012	U.S.A.	NC	Pender	in Shaken Creek swamp, about .4 km southwest of end of Half Moon Road	Coastal Plain Small Stream Swamp sensu Schafale 2012	occasional	7 m. msl	34deg.34'30.7" N	77deg.40'29.6" W	400	Robert Thornhill	1270	2	5	2012			in swamp east of the end of Half Moon Road
NCSC	Carex debilis Michx.	Cyperaceae	Monocots	sensu Weakley 2012	U.S.A.	NC	Pender	in Shaken Creek swamp, about .4 km southwest of end of Half Moon Road	Coastal Plain Small Stream Swamp sensu Schafale 2012	occasional	7 m. msl	34deg.34'30.7" N	77deg.40'29.6" W	400	Robert Thornhill	1270	2	5	2012			in swamp east of the end of Half Moon Road
NCSC	Carex elliottii Schwein. & Torr.	Cyperaceae	Monocots	sensu Weakley 2012	U.S.A.	NC	Pender	in boggy depression on east side of Half Moon Road, approximately 1 mi south from intersection with Flo Road	boggy depression in savanna/flatwood matrix	infrequent	8 m. msl	34deg.34'47.3" N	77deg.40'23.8" W	50	Robert Thornhill	1271	2	5	2012			in boggy depression near Half Moon Road, approximately 1 mi south of intersection with Flo Road
NCSC	Carex elliottii Schweinitz & Torrey	Cyperaceae	Monocots	sensu Weakley 2012	U.S.A.	NC	Pender	Ca. 30 meters east of Half Moon Road, at a point approximately 1.6 km south of intersection with Flo Road	boggy depression in flatwoods	infrequent	7 m. msl	34deg.34'51.6" N	77deg.40'26.4" W	50	Robert Thornhill	532	21	6	2011		y	in boggy area east of Half Moon Road, approximately 1 mi south of intersection with Flo Road
NCSC	Carex elliottii Schweinitz & Torrey	Cyperaceae	Monocots	sensu Weakley 2012	U.S.A.	NC	Pender	Ca. 30 meters east of Half Moon Road, at a point approximately 1.6 km south of intersection with Flo Road	boggy depression in flatwoods	infrequent	7 m. msl	34deg.34'51.6" N	77deg.40'26.4" W	50	Robert Thornhill	532	21	6	2011		y	in boggy area east of Half Moon Road, approximately 1 mi south of intersection with Flo Road
NCSC	Carex gigantea Rudge	Cyperaceae	Monocots	sensu Weakley 2012	U.S.A.	NC	Pender	in marsh in powerline right-of-way, approximately .2 km north of Shaken Creek	Small Depression Pond (?) sensu Schafale 2012	occasional	6 m. msl	34deg.34'51.4" N	77deg.41'25.7" W	50	Robert Thornhill	534	21	6	2011			along edge of swamp and powerline cut, just north of Shaken Creek
NCSC	Carex gigantea Rudge	Cyperaceae	Monocots	sensu Weakley 2012	U.S.A.	NC	Pender	in Shaken Creek swamp, about .4 km southwest of end of Half Moon Road	Coastal Plain Small Stream Swamp sensu Schafale 2012	occasional	7 m. msl	34deg.34'30.7" N	77deg.40'29.6" W	400	Robert Thornhill	1394	15	6	2012			in Shaken Creek swamp, about .3 mi southwest of end of Half Moon Road
NCSC	Carex glaucescens Elliott	Cyperaceae	Monocots	sensu Weakley 2012	U.S.A.	NC	Pender	in savanna on east side of Alligator Lake Road, immediately south of junction with Flo Road	Very Wet Loamy Pine Savanna (sensu Schafale 2012)	occasional	8 m. msl	34deg.34'54.2" N	77deg.38'38.5" W	50	Robert Thornhill	1100	16	9	2011		y
NCSC	Carex glaucescens Elliott	Cyperaceae	Monocots	sensu Weakley 2012	U.S.A.	NC	Pender	in Spodosol savanna on east side of Half Moon Road, 0.5-1.5 km southwest of intersection of Half Moon Road and Flo Road	Sandy Pine Savanna (Typic subtype) sensu Schafale 2012		9 m. msl	34deg.35'15.7" N	77deg.40'16.0" W	500	Robert Thornhill	12	21	8	2010
NCSC	Carex glaucescens Elliott	Cyperaceae	Monocots	sensu Weakley 2012	U.S.A.	NC	Pender	in Spodosol savanna on east side of Half Moon Road, 0.5-1.5 km southwest of intersection of Half Moon Road and Flo Road	Sandy Pine Savanna (Typic subtype) sensu Schafale 2012		9 m. msl	34deg.35'15.7" N	77deg.40'16.0" W	500	Robert Thornhill	12	21	8	2010
NCSC	Carex glaucescens Elliott	Cyperaceae	Monocots	sensu Weakley 2012	U.S.A.	NC	Pender	in large savanna immediately south of intersection of Flo Road and Fill Road	Wet Loamy Pine Savanna (sensu Schafale 2012)	occasional	8 m. msl	34deg.34'54.7" N	77deg.39'9.0" W	100	Robert Thornhill	630	14	7	2011		y
NCSC	Carex glaucescens Elliott	Cyperaceae	Monocots	sensu Weakley 2012	U.S.A.	NC	Pender	in large savanna immediately south of intersection of Flo Road and Fill Road	Wet Loamy Pine Savanna (sensu Schafale 2012)	occasional	8 m. msl	34deg.34'54.7" N	77deg.39'9.0" W	100	Robert Thornhill	692	21	7	2011		y
NCSC	Carex intumescens Rudge var. intumescens	Cyperaceae	Monocots	sensu Weakley 2012	U.S.A.	NC	Pender	in marsh in powerline right-of-way, approximately .2 km north of Shaken Creek	Small Depression Pond (?) sensu Schafale 2012	occasional	6 m. msl	34deg.34'51.4" N	77deg.41'25.7" W	50	Robert Thornhill	533	21	6	2011			along edge of swamp and powerline cut, just north of Shaken Creek
NCSC	Carex intumescens Rudge var. intumescens	Cyperaceae	Monocots	sensu Weakley 2012	U.S.A.	NC	Pender	in marsh in powerline right-of-way, approximately .2 km north of Shaken Creek	Small Depression Pond (?) sensu Schafale 2012	occasional	6 m. msl	34deg.34'51.4" N	77deg.41'25.7" W	50	Robert Thornhill	533	21	6	2011			along edge of swamp and powerline cut, just north of Shaken Creek
NCSC	Carex leptalea Wahlenb. ssp. harperi (Fernald) Calder & Roy L. Taylor	Cyperaceae	Monocots	sensu FNA	U.S.A.	NC	Pender	in Shaken Creek swamp, about .4 km southwest of end of Half Moon Road	Coastal Plain Small Stream Swamp sensu Schafale 2012	infrequent	7 m. msl	34deg.34'30.7" N	77deg.40'29.6" W	400	Robert Thornhill	1385	15	6	2012			in Shaken Creek swamp, about .3 mi southwest of end of Half Moon Road
NCSC	Carex lonchocarpa Willd. ex Spreng.	Cyperaceae	Monocots	sensu Weakley 2012	U.S.A.	NC	Pender	in large savanna immediately south of intersection of Flo Road and Fill Road	Wet Loamy Pine Savanna (sensu Schafale 2012)		8 m. msl	34deg.34'54.7" N	77deg.39'9.0" W	100	Robert Thornhill	369	30	5	2011		y
NCSC	Carex lonchocarpa Willd. ex Spreng.	Cyperaceae	Monocots	sensu Weakley 2012	U.S.A.	NC	Pender	in large savanna immediately south of intersection of Flo Road and Fill Road	Wet Loamy Pine Savanna (sensu Schafale 2012)	occasional along margin of blackwater stream	8 m. msl	34deg.34'54.7" N	77deg.39'9.0" W	100	Robert Thornhill	456	9	6	2011		y
NCSC	Carex lonchocarpa Willd. ex Spreng.	Cyperaceae	Monocots	sensu Weakley 2012	U.S.A.	NC	Pender	in large savanna immediately south of intersection of Flo Road and Fill Road	Wet Loamy Pine Savanna (sensu Schafale 2012)	occasional along margin of blackwater stream	8 m. msl	34deg.34'54.7" N	77deg.39'9.0" W	100	Robert Thornhill	462	9	6	2011		y
NCSC	Carex lonchocarpa Willd. ex Spreng.	Cyperaceae	Monocots	sensu Weakley 2012	U.S.A.	NC	Pender	in large savanna immediately south of intersection of Flo Road and Fill Road	Wet Loamy Pine Savanna (sensu Schafale 2012)	occasional along margin of blackwater stream	8 m. msl	34deg.34'54.7" N	77deg.39'9.0" W	100	Robert Thornhill	462	9	6	2011		y
NCSC	Carex lonchocarpa Willd. ex Spreng.	Cyperaceae	Monocots	sensu Weakley 2012	U.S.A.	NC	Pender	in large savanna immediately south of intersection of Flo Road and Fill Road	Wet Loamy Pine Savanna (sensu Schafale 2012)	occasional along margin of blackwater stream	8 m. msl	34deg.34'54.7" N	77deg.39'9.0" W	100	Robert Thornhill	463	9	6	2011
NCSC	Carex lonchocarpa Willd. ex Spreng.	Cyperaceae	Monocots	sensu Weakley 2012	U.S.A.	NC	Pender	in Shaken Creek swamp, about .4 km southwest of end of Half Moon Road	Coastal Plain Small Stream Swamp sensu Schafale 2012	frequent	7 m. msl	34deg.34'30.7" N	77deg.40'29.6" W	400	Robert Thornhill	1395	15	6	2012			in Shaken Creek swamp, about .3 mi southwest of end of Half Moon Road
NCSC	Carex lurida Wahlenb.	Cyperaceae	Monocots	sensu Weakley 2012	U.S.A.	NC	Pender	around dog pens on Williams Road, approximately .25 km southwest of hunting lodge	weedy roadside	infrequent	8 m. msl	34deg.35'52.9" N	77deg.40'7.3" W	20	Robert Thornhill	1336	3	6	2012			around dog pens on Williams Road
NCSC	Carex lurida Wahlenb.	Cyperaceae	Monocots	sensu Weakley 2012	U.S.A.	NC	Pender	around dog pens on Williams Road, approximately .25 km southwest of hunting lodge	weedy roadside	occasional	8 m. msl	34deg.35'52.9" N	77deg.40'7.3" W	20	Robert Thornhill	1476	26	7	2012			around dog pens on Williams Road
NCSC	Carex lutea LeBlond	Cyperaceae	Monocots	sensu Weakley 2012	U.S.A.	NC	Pender		Very Wet Loamy Pine Savanna (sensu Schafale 2012)	occasional				50	Robert Thornhill	1277	2	5	2012
NCSC	Carex striata Michx.	Cyperaceae	Monocots	sensu FNA	U.S.A.	NC	Pender	in small borrow pit on east side of Half Moon Road, approximately .3 km north of the end of Half Moon Road	roadside ditch	occasional	7 m. msl	34deg.34'41.9" N	77deg.40'21.8" W	50	Robert Thornhill	1352	11	6	2012			Borrow pit near end of Half Moon Road
NCSC	Carex striata Michx.	Cyperaceae	Monocots	sensu FNA	U.S.A.	NC	Pender	in grown-over flatwoods along Bug Ridge Road, near junction with Fill Road	Wet Pine Flatwoods (Typic subtype ) sensu Schafale 2012	occasional	8 m. msl	34deg.36'4.9" N	77deg.38'51.5" W	100	Robert Thornhill	1290	11	5	2012		y
NCSC	Carex striata Michx.	Cyperaceae	Monocots	sensu FNA	U.S.A.	NC	Pender	in savanna on east side of Alligator Lake Road, immediately south of junction with Flo Road	Very Wet Loamy Pine Savanna (sensu Schafale 2012)	frequent	8 m. msl	34deg.34'54.2" N	77deg.38'38.5" W	50	Robert Thornhill	1280	2	5	2012			in moist depressions within savanna
NCSC	Carex striata Michx.	Cyperaceae	Monocots	sensu FNA	U.S.A.	NC	Pender	in borrow pit in Spodosol savanna/flatwood matrix on east side of Half Moon Road, approximately 1.2 km southwest of junction with Flo Road	borrow pit in pine savanna (Sandy Pine Savanna (Typic subtype) sensu Schafale 2012)	frequent	9 m. msl	34deg.35'1.3" N	77deg.40'31.6" W	20	Robert Thornhill	1272	2	5	2012			around and in borrow pit, approximately 1.5 mi south on Half Moon Road
NCSC	Carex striata Michx.	Cyperaceae	Monocots	sensu FNA	U.S.A.	NC	Pender	just south of Mule Pen Road, approximately 2.2 miles west of junction with Williams Road	boggy roadside	frequent	7 m. msl	34deg.35'24.35" N	77deg.42'29.1" W	50	Robert Thornhill	1320	3	6	2012			just south of Mule Pen Road, approximately 1.5 miles past intersection of Mule Pen Road and Williams Road
NCSC	Cladium jamaicense Crantz	Cyperaceae	Monocots	sensu Weakley 2012	U.S.A.	NC	Pender	approximately .4 km west of end of Half Moon Road	Very Wet Loamy Pine Savanna (sensu Schafale 2012)	frequent	7 m. msl	34deg.34'32.3" N	77deg.40'35.4" W	50	Robert Thornhill	1361	11	6	2012			approximately .4 mi west of end of Half Moon Road; frequent along savanna/swamp ecotone
NCSC	Cyperus compressus L.	Cyperaceae	Monocots	sensu Weakley 2012	U.S.A.	NC	Pender	along Flo Road, 0.4-1.2 km southeast of junction with Half Moon Road	sandy roadside margin, adjacent to pine savanna	occasional	9 m. msl	34deg.35'11.9" N	77deg.39'45.9" W	400	Robert Thornhill	1214	28	10	2011
NCSC	Cyperus polystachyos Rottb.	Cyperaceae	Monocots	sensu Weakley 2012	U.S.A.	NC	Pender	along eastern edge of powerline cut, approximately .2 mi south of junction with Indian Grave Road	Mesic Pine Savanna (Coastal Plain subtype) sensu Schafale 2012	occasional	9 m. msl	34deg.35'1.4" N	77deg.41'10.41" W	50	Robert Thornhill	1535	28	8	2012			at edge of powerline cut and mesic pine flatwoods, approximately .2 mi south of where Indian Grave Road crosses the powerline cut
NCSC	Cyperus retrorsus Chapm.	Cyperaceae	Monocots	sensu Weakley 2012	U.S.A.	NC	Pender	along Flo Road, 0.4-1.2 km southeast of junction with Half Moon Road	sandy roadside margin, adjacent to pine savanna	frequent	9 m. msl	34deg.35'11.9" N	77deg.39'45.9" W	400	Robert Thornhill	638	14	7	2011		y
NCSC	Cyperus retrorsus Chapm.	Cyperaceae	Monocots	sensu Weakley 2012	U.S.A.	NC	Pender	along eastern edge of powerline cut, approximately .2 mi south of junction with Indian Grave Road	Mesic Pine Savanna (Coastal Plain subtype) sensu Schafale 2012	frequent	9 m. msl	34deg.35'1.4" N	77deg.41'10.41" W	50	Robert Thornhill	1536	28	8	2012			at edge of powerline cut and mesic pine flatwoods, approximately .2 mi south of where Indian Grave Road crosses the powerline cut
NCSC	Dulichium arundinaceum (L.) Britton var. arundinaceum	Cyperaceae	Monocots	sensu Weakley 2012	U.S.A.	NC	Pender	in marsh in powerline right-of-way, approximately .2 km north of Shaken Creek	Small Depression Pond (?) sensu Schafale 2012	occasional	6 m. msl	34deg.34'51.4" N	77deg.41'25.7" W	50	Robert Thornhill	1532	28	8	2012			in depression pond in powerline cut just north of Shaken Creek
NCSC	Dulichium arundinaceum (L.) Britton var. arundinaceum	Cyperaceae	Monocots	sensu Weakley 2012	U.S.A.	NC	Pender	in Shaken Creek swamp, about .4 km southwest of end of Half Moon Road	Coastal Plain Small Stream Swamp sensu Schafale 2012	frequent	7 m. msl	34deg.34'30.7" N	77deg.40'29.6" W	400	Robert Thornhill	1387	15	6	2012			in Shaken Creek swamp, about .3 mi southwest of end of Half Moon Road
NCSC	Eleocharis baldwinii (Torr.) Chapm.	Cyperaceae	Monocots	sensu Weakley 2012	U.S.A.	NC	Pender	in Long Ridge Road, northwest corner of property, approximately .45 km southwest of junction with Flo Road	sandy roadside	occasional	9 m. msl	34deg.36'32.7" N	77deg.41'18.7" W	20	Robert Thornhill	1462	26	7	2012			in road in northwest corner of property
NCSC	Eleocharis baldwinii (Torr.) Chapm.	Cyperaceae	Monocots	sensu Weakley 2012	U.S.A.	NC	Pender	in path in dry ridge approximately .2 km north of the fork in Mule Pen Road (i.e., ca. 2 km west of junction with Williams Road)	Mesic Pine Savanna (Coastal Plain subtype) sensu Schafale 2012	occasional	8 m. msl	34deg.35'38.9" N	77deg.42'19.5" W	50	Robert Thornhill	1512	14	8	2012			sandy ridge north of the fork in Mule Pen Road
NCSC	Eleocharis equisetoides (Elliott) Torr.	Cyperaceae	Monocots	sensu Weakley 2012	U.S.A.	NC	Pender	in borrow pit in Spodosol savanna/flatwood matrix on west side of Half Moon Road, approximately 1 km southwest of intersection of Half Moon Road and Flo Road	borrow pit in pine savanna (Sandy Pine Savanna (Typic subtype) sensu Schafale 2012	frequent (in some borrow pits)	9 m. msl	34deg.35'9.3" N	77deg.40'27.6" W	20	Robert Thornhill	270	15	5	2011		y
NCSC	Eleocharis microcarpa Torr. var. filiculmis Torr.	Cyperaceae	Monocots	sensu Weakley 2012	U.S.A.	NC	Pender	in borrow pit in Spodosol savanna/flatwood matrix on along Half Moon Road, approximately 0.5-1.5 km southwest of intersection of Half Moon Road and Flo Road	borrow pit in pine savanna (Sandy Pine Savanna (Typic subtype) sensu Schafale 2012		9 m. msl	34deg.35'15.7" N	77deg.40'16.0" W	1000	Robert Thornhill	505	10	6	2011
NCSC	Eleocharis microcarpa Torr. var. filiculmis Torr.	Cyperaceae	Monocots	sensu Weakley 2012	U.S.A.	NC	Pender	in borrow pit in Spodosol savanna/flatwood matrix on along Half Moon Road, approximately 0.5-1.5 km southwest of intersection of Half Moon Road and Flo Road	borrow pit in pine savanna (Sandy Pine Savanna (Typic subtype) sensu Schafale 2012		9 m. msl	34deg.35'15.7" N	77deg.40'16.0" W	1000	Robert Thornhill	505	10	6	2011
NCSC	Eleocharis microcarpa Torr. var. filiculmis Torr.	Cyperaceae	Monocots	sensu Weakley 2012	U.S.A.	NC	Pender	in savanna on east side of Alligator Lake Road, immediately south of junction with Flo Road	Very Wet Loamy Pine Savanna (sensu Schafale 2012)		8 m. msl	34deg.34'54.2" N	77deg.38'38.5" W	50	Robert Thornhill	723	21	7	2011
NCSC	Eleocharis microcarpa Torr. var. filiculmis Torr.	Cyperaceae	Monocots	sensu Weakley 2012	U.S.A.	NC	Pender	in Spodosol savanna on east side of Half Moon Road, 0.5-1.5 km southwest of intersection of Half Moon Road and Flo Road	Sandy Pine Savanna (Typic subtype) sensu Schafale 2012		9 m. msl	34deg.35'15.7" N	77deg.40'16.0" W	500	Robert Thornhill	18	21	8	2010
NCSC	Eleocharis microcarpa Torr. var. filiculmis Torr.	Cyperaceae	Monocots	sensu Weakley 2012	U.S.A.	NC	Pender	along Flo Road at junction with powerline cut	sandy roadside	occasional	8 m. msl	34deg.35'46.6" N	77deg.40'10.2" W	5	Robert Thornhill	1432	11	7	2012			south side of Flo Road at juncture with powerline cut
NCSC	Eleocharis tuberculosa (Michx.) Roem. & Schult.	Cyperaceae	Monocots	sensu Weakley 2012	U.S.A.	NC	Pender	in pine savannas along Flo Road, approximately 0.4-1.2 km southeast of junction with Half Moon Road	Sandy Pine Savanna (Rush Featherling subtype) sensu Schafale 2012	occasional	9 m. msl	34deg.35'11.9" N	77deg.39'45.9" W	400	Robert Thornhill	1305	3	6	2012
NCSC	Eleocharis tuberculosa (Michx.) Roem. & Schult.	Cyperaceae	Monocots	sensu Weakley 2012	U.S.A.	NC	Pender	in Flo Road, approximately .3 km southeast of intersection with Half Moon Road	sandy roadside	occasional	10 m. msl	34deg.35'27.7" N	77deg.39'57.9" W	15	Robert Thornhill	1493	26	7	2012		y	along Flo Road, approximately .3 mi southeast of intersection of Flo Road and Half Moon Road
NCSC	Fimbristylis autumnalis (L.) Roem. & Schult.	Cyperaceae	Monocots	sensu Weakley 2013	U.S.A.	NC	Pender	roadside adjacent to Spodosol savanna, approximately 1 km southwest along Half Moon Road from junction with Flo Road	sandy roadside	infrequent	9 m. msl	34deg.35'15.7" N	77deg.40'16.0" W	50	Robert Thornhill	25	21	8	2010
NCSC	Fimbristylis puberula (Michx.) Vahl var. puberula	Cyperaceae	Monocots	sensu Weakley 2012	U.S.A.	NC	Pender	in savanna on east side of Alligator Lake Road, immediately south of junction with Flo Road	Very Wet Loamy Pine Savanna (sensu Schafale 2012)		8 m. msl	34deg.34'54.2" N	77deg.38'38.5" W	50	Robert Thornhill	518	10	6	2011
NCSC	Fimbristylis puberula (Michx.) Vahl var. puberula	Cyperaceae	Monocots	sensu Weakley 2012	U.S.A.	NC	Pender	in savanna on east side of Alligator Lake Road, immediately south of junction with Flo Road	Very Wet Loamy Pine Savanna (sensu Schafale 2012)		8 m. msl	34deg.34'54.2" N	77deg.38'38.5" W	50	Robert Thornhill	518	10	6	2011
NCSC	Fimbristylis puberula (Michx.) Vahl var. puberula	Cyperaceae	Monocots	sensu Weakley 2012	U.S.A.	NC	Pender	in large savanna immediately south of intersection of Flo Road and Fill Road	Wet Loamy Pine Savanna (sensu Schafale 2012)	occasional	8 m. msl	34deg.34'54.7" N	77deg.39'9.0" W	100	Robert Thornhill	373	30	5	2011
NCSC	Fimbristylis puberula (Michx.) Vahl var. puberula	Cyperaceae	Monocots	sensu Weakley 2012	U.S.A.	NC	Pender	in large savanna immediately south of intersection of Flo Road and Fill Road	Wet Loamy Pine Savanna (sensu Schafale 2012)	occasional	8 m. msl	34deg.34'54.7" N	77deg.39'9.0" W	100	Robert Thornhill	373	30	5	2011
NCSC	Fimbristylis puberula (Michx.) Vahl var. puberula	Cyperaceae	Monocots	sensu Weakley 2012	U.S.A.	NC	Pender	in savanna immediately south of Flo Road, approximately 0.3km east of intersection of Flo Road and Fill Road	Wet Loamy Pine Savanna (sensu Schafale 2012)	occasional	8 m. msl	34deg.34'56.3" N	77deg.38'48.6" W	50	Robert Thornhill	326	30	5	2011
NCSC	Fuirena breviseta (Coville) Coville	Cyperaceae	Monocots	sensu Weakley 2012	U.S.A.	NC	Pender	in savanna immediately south of Flo Road, approximately 0.3km east of intersection of Flo Road and Fill Road	Wet Loamy Pine Savanna (sensu Schafale 2012)	occasional	8 m. msl	34deg.34'56.3" N	77deg.38'48.6" W	50	Robert Thornhill	852	12	8	2011		y
NCSC	Fuirena breviseta (Coville) Coville	Cyperaceae	Monocots	sensu Weakley 2012	U.S.A.	NC	Pender	in savanna on east side of Alligator Lake Road, immediately south of junction with Flo Road	Very Wet Loamy Pine Savanna (sensu Schafale 2012)	occasional	8 m. msl	34deg.34'54.2" N	77deg.38'38.5" W	50	Robert Thornhill	736	21	7	2011
NCSC	Fuirena breviseta (Coville) Coville	Cyperaceae	Monocots	sensu Weakley 2012	U.S.A.	NC	Pender	in savanna immediately south of Flo Road, approximately 0.3km east of intersection of Flo Road and Fill Road	Wet Loamy Pine Savanna (sensu Schafale 2012)	occasional	8 m. msl	34deg.34'56.3" N	77deg.38'48.6" W	50	Robert Thornhill	737	21	7	2011		y
NCSC	Fuirena pumila (Torr.) Spreng.	Cyperaceae	Monocots	sensu Weakley 2012	U.S.A.	NC	Pender	in marsh in powerline right-of-way, approximately .2 km north of Shaken Creek	Small Depression Pond (?) sensu Schafale 2012	occasional	6 m. msl	34deg.34'51.4" N	77deg.41'25.7" W	50	Robert Thornhill	1533	28	8	2012			in depression pond in powerline cut just north of Shaken Creek
NCSC	Isolepis carinata Hook. & Arn. ex Torr.	Cyperaceae	Monocots	sensu Weakley 2012	U.S.A.	NC	Pender		sandy roadside	infrequent				15	Robert Thornhill	1263	26	3	2012
NCSC	Kyllinga odorata Vahl	Cyperaceae	Monocots	sensu Weakley 2012	U.S.A.	NC	Pender	around dog pens on Williams Road, approximately .25 km southwest of hunting lodge	weedy roadside	occasional	8 m. msl	34deg.35'52.9" N	77deg.40'7.3" W	20	Robert Thornhill	1363	11	6	2012			around dog pens on Williams Road, just south of lodge
NCSC	Rhynchospora baldwinii A. Gray	Cyperaceae	Monocots	sensu Weakley 2012	U.S.A.	NC	Pender	in large savanna immediately south of intersection of Flo Road and Fill Road	Wet Loamy Pine Savanna (sensu Schafale 2012)		8 m. msl	34deg.34'54.7" N	77deg.39'9.0" W	100	Robert Thornhill	629	14	7	2011
NCSC	Rhynchospora baldwinii A. Gray	Cyperaceae	Monocots	sensu Weakley 2012	U.S.A.	NC	Pender	in large savanna immediately south of intersection of Flo Road and Fill Road	Wet Loamy Pine Savanna (sensu Schafale 2012)		8 m. msl	34deg.34'54.7" N	77deg.39'9.0" W	100	Robert Thornhill	629	14	7	2011
NCSC	Rhynchospora caduca Elliott	Cyperaceae	Monocots	sensu Weakley 2012	U.S.A.	NC	Pender	in savanna on east side of Alligator Lake Road, immediately south of junction with Flo Road	Very Wet Loamy Pine Savanna (sensu Schafale 2012)		8 m. msl	34deg.34'54.2" N	77deg.38'38.5" W	50	Robert Thornhill	868	12	8	2011
NCSC	Rhynchospora caduca Elliott	Cyperaceae	Monocots	sensu Weakley 2012	U.S.A.	NC	Pender	at northern edge of pine savanna on northeast side Flo Road, approximately 1 km southeast of junction with Half Moon Road	Very Wet Loamy Pine Savanna (sensu Schafale 2012)		8 m. msl	34deg.35'4.6" N	77deg.39'31.2" W	50	Robert Thornhill	959	26	8	2011
NCSC	Rhynchospora caduca Elliott	Cyperaceae	Monocots	sensu Weakley 2012	U.S.A.	NC	Pender	in savanna on east side of Alligator Lake Road, immediately south of junction with Flo Road	Very Wet Loamy Pine Savanna (sensu Schafale 2012)		8 m. msl	34deg.34'54.2" N	77deg.38'38.5" W	50	Robert Thornhill	729	21	7	2011
NCSC	Rhynchospora caduca Elliott	Cyperaceae	Monocots	sensu Weakley 2012	U.S.A.	NC	Pender	in savanna on east side of Alligator Lake Road, immediately south of junction with Flo Road	Very Wet Loamy Pine Savanna (sensu Schafale 2012)		8 m. msl	34deg.34'54.2" N	77deg.38'38.5" W	50	Robert Thornhill	733	21	7	2011
NCSC	Rhynchospora caduca Elliott	Cyperaceae	Monocots	sensu Weakley 2012	U.S.A.	NC	Pender	Approximately .7 km north from Flo Road along path that begins .4 km east of intersection with Half Moon Road and that connects Flo Road and Bug Ridge Road	Wet Pine Flatwoods (Typic subtype ) sensu Schafale 2012	occasional	8 m. msl	34deg.35'38.0" N	77deg.39'38.0" W	50	Robert Thornhill	1345	3	6	2012			.5 mi north of Flo Road, approximately .25 mi east of intersection with Half Moon Road
NCSC	Rhynchospora cephalantha A. Gray var. cephalantha	Cyperaceae	Monocots	sensu Weakley 2012	U.S.A.	NC	Pender	in pine savannas along Flo Road, approximately 0.4-1.2 km southeast of junction with Half Moon Road	Sandy Pine Savanna (Rush Featherling subtype) sensu Schafale 2012		9 m. msl	34deg.35'11.9" N	77deg.39'45.9" W	400	Robert Thornhill	661	14	7	2011
NCSC	Rhynchospora cephalantha A. Gray var. cephalantha	Cyperaceae	Monocots	sensu Weakley 2012	U.S.A.	NC	Pender	in pine savannas along Flo Road, approximately 0.4-1.2 km southeast of junction with Half Moon Road	Sandy Pine Savanna (Rush Featherling subtype) sensu Schafale 2012	occasional	9 m. msl	34deg.35'11.9" N	77deg.39'45.9" W	400	Robert Thornhill	796	4	8	2011
NCSC	Rhynchospora cephalantha A. Gray var. cephalantha	Cyperaceae	Monocots	sensu Weakley 2012	U.S.A.	NC	Pender	in pine savannas along Flo Road, approximately 0.4-1.2 km southeast of junction with Half Moon Road	Sandy Pine Savanna (Rush Featherling subtype) sensu Schafale 2012	occasional	9 m. msl	34deg.35'11.9" N	77deg.39'45.9" W	400	Robert Thornhill	822	4	8	2011
NCSC	Rhynchospora cephalantha A. Gray var. cephalantha	Cyperaceae	Monocots	sensu Weakley 2012	U.S.A.	NC	Pender	in savanna on east side of Alligator Lake Road, immediately south of junction with Flo Road	Very Wet Loamy Pine Savanna (sensu Schafale 2012)		8 m. msl	34deg.34'54.2" N	77deg.38'38.5" W	50	Robert Thornhill	9	21	8	2010		y
NCSC	Rhynchospora cephalantha A. Gray var. cephalantha	Cyperaceae	Monocots	sensu Weakley 2012	U.S.A.	NC	Pender	in savanna on east side of Alligator Lake Road, immediately south of junction with Flo Road	Very Wet Loamy Pine Savanna (sensu Schafale 2012)		8 m. msl	34deg.34'54.2" N	77deg.38'38.5" W	50	Robert Thornhill	9	21	8	2010		y
NCSC	Rhynchospora cephalantha A. Gray var. cephalantha	Cyperaceae	Monocots	sensu Weakley 2012	U.S.A.	NC	Pender	in savanna on east side of Alligator Lake Road, immediately south of junction with Flo Road	Very Wet Loamy Pine Savanna (sensu Schafale 2012)	occasional	8 m. msl	34deg.34'54.2" N	77deg.38'38.5" W	50	Robert Thornhill	735	21	7	2011
NCSC	Rhynchospora cephalantha A. Gray var. cephalantha	Cyperaceae	Monocots	sensu Weakley 2012	U.S.A.	NC	Pender	in savanna on east side of Alligator Lake Road, immediately south of junction with Flo Road	Very Wet Loamy Pine Savanna (sensu Schafale 2012)	occasional	8 m. msl	34deg.34'54.2" N	77deg.38'38.5" W	50	Robert Thornhill	735	21	7	2011
NCSC	Rhynchospora cephalantha A. Gray var. cephalantha	Cyperaceae	Monocots	sensu Weakley 2012	U.S.A.	NC	Pender	in Spodosol savanna on east side of Half Moon Road, 0.5-1.5 km southwest of intersection of Half Moon Road and Flo Road	Sandy Pine Savanna (Typic subtype) sensu Schafale 2012		9 m. msl	34deg.35'15.7" N	77deg.40'16.0" W	500	Robert Thornhill	721	21	7	2011
NCSC	Rhynchospora cephalantha A. Gray var. cephalantha	Cyperaceae	Monocots	sensu Weakley 2012	U.S.A.	NC	Pender	in large savanna immediately south of intersection of Flo Road and Fill Road	Wet Loamy Pine Savanna (sensu Schafale 2012)	occasional	8 m. msl	34deg.34'54.7" N	77deg.39'9.0" W	100	Robert Thornhill	783	3	8	2011
NCSC	Rhynchospora chalarocephala Fernald & Gale	Cyperaceae	Monocots	sensu Weakley 2012	U.S.A.	NC	Pender	along Half Moon Road, approximately 0.8 km southwest of junction with Flo Road	Sandy Pine Savanna (Typic subtype) sensu Schafale 2012	occasional	9 m. msl	34deg.35'15.7" N	77deg.40'16.0" W	50	Robert Thornhill	901	19	8	2011		y
NCSC	Rhynchospora chalarocephala Fernald & Gale	Cyperaceae	Monocots	sensu Weakley 2012	U.S.A.	NC	Pender	in Spodosol savanna on east side of Half Moon Road, 0.5-1.5 km southwest of intersection of Half Moon Road and Flo Road	Sandy Pine Savanna (Typic subtype) sensu Schafale 2012		9 m. msl	34deg.35'15.7" N	77deg.40'16.0" W	500	Robert Thornhill	15	21	8	2010
NCSC	Rhynchospora chalarocephala Fernald & Gale	Cyperaceae	Monocots	sensu Weakley 2012	U.S.A.	NC	Pender	in Spodosol savanna on east side of Half Moon Road, 0.5-1.5 km southwest of intersection of Half Moon Road and Flo Road	Sandy Pine Savanna (Typic subtype) sensu Schafale 2012	occasional	9 m. msl	34deg.35'15.7" N	77deg.40'16.0" W	500	Robert Thornhill	814	4	8	2011
NCSC	Rhynchospora chapmanii M.A. Curtis	Cyperaceae	Monocots	sensu Weakley 2012	U.S.A.	NC	Pender	in powerline cut between Bug Ridge Road and Flo Road	Wet Loamy Pine Savanna (sensu Schafale 2012)		8 m. msl	34deg.34'56.3" N	77deg.38'48.6" W	50	Robert Thornhill	1505	3	8	2012			in powerline cut between Bug Ridge Road and Flo Road
NCSC	Rhynchospora chapmanii M.A. Curtis	Cyperaceae	Monocots	sensu Weakley 2012	U.S.A.	NC	Pender	in Spodosol savanna on east side of Half Moon Road, 0.5-1.5 km southwest of intersection of Half Moon Road and Flo Road	Sandy Pine Savanna (Typic subtype) sensu Schafale 2012	occasional	9 m. msl	34deg.35'15.7" N	77deg.40'16.0" W	500	Robert Thornhill	809	4	8	2011
NCSC	Rhynchospora chapmanii M.A. Curtis	Cyperaceae	Monocots	sensu Weakley 2012	U.S.A.	NC	Pender	in large savanna immediately south of intersection of Flo Road and Fill Road	Wet Loamy Pine Savanna (sensu Schafale 2012)	occasional	8 m. msl	34deg.34'54.7" N	77deg.39'9.0" W	100	Robert Thornhill	777	3	8	2011
NCSC	Rhynchospora ciliaris (Michx.) C. Mohr	Cyperaceae	Monocots	sensu Weakley 2012	U.S.A.	NC	Pender	in pine savannas along Flo Road, approximately 0.4-1.2 km southeast of junction with Half Moon Road	Sandy Pine Savanna (Rush Featherling subtype) sensu Schafale 2012		9 m. msl	34deg.35'11.9" N	77deg.39'45.9" W	400	Robert Thornhill	654	14	7	2011
NCSC	Rhynchospora ciliaris (Michx.) C. Mohr	Cyperaceae	Monocots	sensu Weakley 2012	U.S.A.	NC	Pender	in Spodosol savanna on east side of Half Moon Road, 0.5-1.5 km southwest of intersection of Half Moon Road and Flo Road	Sandy Pine Savanna (Typic subtype) sensu Schafale 2012		9 m. msl	34deg.35'15.7" N	77deg.40'16.0" W	500	Robert Thornhill	397	31	5	2011
NCSC	Rhynchospora ciliaris (Michx.) C. Mohr	Cyperaceae	Monocots	sensu Weakley 2012	U.S.A.	NC	Pender	in Spodosol savanna on east side of Half Moon Road, 0.5-1.5 km southwest of intersection of Half Moon Road and Flo Road	Sandy Pine Savanna (Typic subtype) sensu Schafale 2012		9 m. msl	34deg.35'15.7" N	77deg.40'16.0" W	500	Robert Thornhill	506	10	6	2011
NCSC	Rhynchospora ciliaris (Michx.) C. Mohr	Cyperaceae	Monocots	sensu Weakley 2012	U.S.A.	NC	Pender	in Spodosol savanna on east side of Half Moon Road, 0.5-1.5 km southwest of intersection of Half Moon Road and Flo Road	Sandy Pine Savanna (Typic subtype) sensu Schafale 2012		9 m. msl	34deg.35'15.7" N	77deg.40'16.0" W	500	Robert Thornhill	511	10	6	2011
NCSC	Rhynchospora colorata (L.) H. Pfeiff.	Cyperaceae	Monocots	sensu Weakley 2012	U.S.A.	NC	Pender	in savanna .18 km south of Flo Road at a point approximately 0.3km east of intersection of Flo Road and Fill Road	Very Wet Loamy Pine Savanna (sensu Schafale 2012)	occasional	8 m. msl	34deg.34'50.5" N	77deg.38'46.6" W	50	Robert Thornhill	319	30	5	2011		y
NCSC	Rhynchospora colorata (L.) H. Pfeiff.	Cyperaceae	Monocots	sensu Weakley 2012	U.S.A.	NC	Pender	in savanna .18 km south of Flo Road at a point approximately 0.3km east of intersection of Flo Road and Fill Road	Very Wet Loamy Pine Savanna (sensu Schafale 2012)	occasional	8 m. msl	34deg.34'50.5" N	77deg.38'46.6" W	50	Robert Thornhill	441	9	6	2011
NCSC	Rhynchospora colorata (L.) H. Pfeiff.	Cyperaceae	Monocots	sensu Weakley 2012	U.S.A.	NC	Pender	in savanna on east side of Alligator Lake Road, immediately south of junction with Flo Road	Very Wet Loamy Pine Savanna (sensu Schafale 2012)	occasional	8 m. msl	34deg.34'54.2" N	77deg.38'38.5" W	50	Robert Thornhill	484	10	6	2011
NCSC	Rhynchospora colorata (L.) H. Pfeiff.	Cyperaceae	Monocots	sensu Weakley 2012	U.S.A.	NC	Pender	in savanna on east side of Alligator Lake Road, immediately south of junction with Flo Road	Very Wet Loamy Pine Savanna (sensu Schafale 2012)	occasional	8 m. msl	34deg.34'54.2" N	77deg.38'38.5" W	50	Robert Thornhill	684	21	7	2011
NCSC	Rhynchospora colorata (L.) H. Pfeiff.	Cyperaceae	Monocots	sensu Weakley 2012	U.S.A.	NC	Pender	in savanna immediately south of Flo Road, approximately 0.3km east of intersection of Flo Road and Fill Road	Wet Loamy Pine Savanna (sensu Schafale 2012)	occasional	8 m. msl	34deg.34'56.3" N	77deg.38'48.6" W	50	Robert Thornhill	328	30	5	2011
NCSC	Rhynchospora decurrens Chapm.	Cyperaceae	Monocots	sensu Weakley 2012	U.S.A.	NC	Pender		Coastal Plain Small Stream Swamp sensu Schafale 2012	infrequent				400	Robert Thornhill	1390	15	6	2012
NCSC	Rhynchospora distans (Michx.) Vahl	Cyperaceae	Monocots	sensu Weakley 2012	U.S.A.	NC	Pender	in pine savannas along Flo Road, approximately 0.4-1.2 km southeast of junction with Half Moon Road	Sandy Pine Savanna (Rush Featherling subtype) sensu Schafale 2012		9 m. msl	34deg.35'11.9" N	77deg.39'45.9" W	400	Robert Thornhill	659	14	7	2011
NCSC	Rhynchospora distans (Michx.) Vahl	Cyperaceae	Monocots	sensu Weakley 2012	U.S.A.	NC	Pender	in pine savannas along Flo Road, approximately 0.4-1.2 km southeast of junction with Half Moon Road	Sandy Pine Savanna (Rush Featherling subtype) sensu Schafale 2012		9 m. msl	34deg.35'11.9" N	77deg.39'45.9" W	400	Robert Thornhill	659	14	7	2011
NCSC	Rhynchospora filifolia A. Gray	Cyperaceae	Monocots	sensu Weakley 2012	U.S.A.	NC	Pender	in savanna on east side of Alligator Lake Road, immediately south of junction with Flo Road	Very Wet Loamy Pine Savanna (sensu Schafale 2012)		8 m. msl	34deg.34'54.2" N	77deg.38'38.5" W	50	Robert Thornhill	727	21	7	2011
NCSC	Rhynchospora filifolia A. Gray	Cyperaceae	Monocots	sensu Weakley 2012	U.S.A.	NC	Pender	in Spodosol savanna on east side of Half Moon Road, 0.5-1.5 km southwest of intersection of Half Moon Road and Flo Road	Sandy Pine Savanna (Typic subtype) sensu Schafale 2012		9 m. msl	34deg.35'15.7" N	77deg.40'16.0" W	500	Robert Thornhill	396	31	5	2011
NCSC	Rhynchospora filifolia A. Gray	Cyperaceae	Monocots	sensu Weakley 2012	U.S.A.	NC	Pender	in Spodosol savanna on east side of Half Moon Road, 0.5-1.5 km southwest of intersection of Half Moon Road and Flo Road	Sandy Pine Savanna (Typic subtype) sensu Schafale 2012		9 m. msl	34deg.35'15.7" N	77deg.40'16.0" W	500	Robert Thornhill	811	4	8	2011
NCSC	Rhynchospora filifolia A. Gray	Cyperaceae	Monocots	sensu Weakley 2012	U.S.A.	NC	Pender	in large savanna immediately south of intersection of Flo Road and Fill Road	Wet Loamy Pine Savanna (sensu Schafale 2012)		8 m. msl	34deg.34'54.7" N	77deg.39'9.0" W	100	Robert Thornhill	635	14	7	2011
NCSC	Rhynchospora filifolia A. Gray	Cyperaceae	Monocots	sensu Weakley 2012	U.S.A.	NC	Pender	in savanna immediately south of Flo Road, approximately 0.3km east of intersection of Flo Road and Fill Road	Wet Loamy Pine Savanna (sensu Schafale 2012)		8 m. msl	34deg.34'56.3" N	77deg.38'48.6" W	50	Robert Thornhill	697	21	7	2011
NCSC	Rhynchospora filifolia A. Gray	Cyperaceae	Monocots	sensu Weakley 2012	U.S.A.	NC	Pender	in savanna immediately south of Flo Road, approximately 0.3km east of intersection of Flo Road and Fill Road	Wet Loamy Pine Savanna (sensu Schafale 2012)		8 m. msl	34deg.34'56.3" N	77deg.38'48.6" W	50	Robert Thornhill	697	21	7	2011
NCSC	Rhynchospora galeana Naczi, W.M. Knapp & G. Moor	Cyperaceae	Monocots	sensu Weakley 2012	U.S.A.	NC	Pender		Sandy Pine Savanna (Rush Featherling subtype) sensu Schafale 2012					400	Robert Thornhill	784	4	8	2011
NCSC	Rhynchospora globularis (Chapm.) Small	Cyperaceae	Monocots	sensu Weakley 2012	U.S.A.	NC	Pender	in savanna on east side of Alligator Lake Road, immediately south of junction with Flo Road	Very Wet Loamy Pine Savanna (sensu Schafale 2012)		8 m. msl	34deg.34'54.2" N	77deg.38'38.5" W	50	Robert Thornhill	252	15	5	2011		y
NCSC	Rhynchospora gracilenta A. Gray	Cyperaceae	Monocots	sensu Weakley 2012	U.S.A.	NC	Pender	in savanna on east side of Alligator Lake Road, immediately south of junction with Flo Road	Very Wet Loamy Pine Savanna (sensu Schafale 2012)		8 m. msl	34deg.34'54.2" N	77deg.38'38.5" W	50	Robert Thornhill	1096	16	9	2011
NCSC	Rhynchospora gracilenta A. Gray	Cyperaceae	Monocots	sensu Weakley 2012	U.S.A.	NC	Pender	in savanna on east side of Alligator Lake Road, immediately south of junction with Flo Road	Very Wet Loamy Pine Savanna (sensu Schafale 2012)		8 m. msl	34deg.34'54.2" N	77deg.38'38.5" W	50	Robert Thornhill	1103	16	9	2011
NCSC	Rhynchospora gracilenta A. Gray	Cyperaceae	Monocots	sensu Weakley 2012	U.S.A.	NC	Pender	in savanna on east side of Alligator Lake Road, immediately south of junction with Flo Road	Very Wet Loamy Pine Savanna (sensu Schafale 2012)		8 m. msl	34deg.34'54.2" N	77deg.38'38.5" W	50	Robert Thornhill	1103	16	9	2011
NCSC	Rhynchospora gracilenta A. Gray	Cyperaceae	Monocots	sensu Weakley 2012	U.S.A.	NC	Pender	in large savanna immediately south of intersection of Flo Road and Fill Road	Wet Loamy Pine Savanna (sensu Schafale 2012)		8 m. msl	34deg.34'54.7" N	77deg.39'9.0" W	100	Robert Thornhill	626	14	7	2011
NCSC	Rhynchospora inexpansa (Michx.) Vahl	Cyperaceae	Monocots	sensu Weakley 2012	U.S.A.	NC	Pender	in pine savannas along Flo Road, approximately 0.4-1.2 km southeast of junction with Half Moon Road	Sandy Pine Savanna (Rush Featherling subtype) sensu Schafale 2012	frequent	9 m. msl	34deg.35'11.9" N	77deg.39'45.9" W	400	Robert Thornhill	652	14	7	2011
NCSC	Rhynchospora inexpansa (Michx.) Vahl	Cyperaceae	Monocots	sensu Weakley 2012	U.S.A.	NC	Pender	in pine savannas along Flo Road, approximately 0.4-1.2 km southeast of junction with Half Moon Road	Sandy Pine Savanna (Rush Featherling subtype) sensu Schafale 2012	frequent	9 m. msl	34deg.35'11.9" N	77deg.39'45.9" W	400	Robert Thornhill	655	14	7	2011		y
NCSC	Rhynchospora inexpansa (Michx.) Vahl	Cyperaceae	Monocots	sensu Weakley 2012	U.S.A.	NC	Pender	along Flo Road, 0.4-1.2 km southeast of junction with Half Moon Road	sandy roadside margin, adjacent to pine savanna	frequent	9 m. msl	34deg.35'11.9" N	77deg.39'45.9" W	400	Robert Thornhill	645	14	7	2011
NCSC	Rhynchospora inexpansa (Michx.) Vahl	Cyperaceae	Monocots	sensu Weakley 2012	U.S.A.	NC	Pender	in large savanna immediately south of intersection of Flo Road and Fill Road	Wet Loamy Pine Savanna (sensu Schafale 2012)		8 m. msl	34deg.34'54.7" N	77deg.39'9.0" W	100	Robert Thornhill	633	14	7	2011
NCSC	Rhynchospora inexpansa (Michx.) Vahl	Cyperaceae	Monocots	sensu Weakley 2012	U.S.A.	NC	Pender	in savanna immediately south of Flo Road, approximately 0.3km east of intersection of Flo Road and Fill Road	Wet Loamy Pine Savanna (sensu Schafale 2012)		8 m. msl	34deg.34'56.3" N	77deg.38'48.6" W	50	Robert Thornhill	695	21	7	2011
NCSC	Rhynchospora latifolia	Cyperaceae	Monocots	sensu Weakley 2012	U.S.A.	NC	Pender	in savanna on east side of Alligator Lake Road, immediately south of junction with Flo Road	Very Wet Loamy Pine Savanna (sensu Schafale 2012)	frequent	8 m. msl	34deg.34'54.2" N	77deg.38'38.5" W	50	Robert Thornhill	11	21	8	2010
NCSC	Rhynchospora latifolia	Cyperaceae	Monocots	sensu Weakley 2012	U.S.A.	NC	Pender	in savanna on east side of Alligator Lake Road, immediately south of junction with Flo Road	Very Wet Loamy Pine Savanna (sensu Schafale 2012)	frequent	8 m. msl	34deg.34'54.2" N	77deg.38'38.5" W	50	Robert Thornhill	11	21	8	2010
NCSC	Rhynchospora latifolia	Cyperaceae	Monocots	sensu Weakley 2012	U.S.A.	NC	Pender	in Spodosol savanna on east side of Half Moon Road, 0.5-1.5 km southwest of intersection of Half Moon Road and Flo Road	Sandy Pine Savanna (Typic subtype) sensu Schafale 2012	frequent	9 m. msl	34deg.35'15.7" N	77deg.40'16.0" W	500	Robert Thornhill	529	21	6	2011
NCSC	Rhynchospora latifolia	Cyperaceae	Monocots	sensu Weakley 2012	U.S.A.	NC	Pender	in large savanna immediately south of intersection of Flo Road and Fill Road	Wet Loamy Pine Savanna (sensu Schafale 2012)		8 m. msl	34deg.34'54.7" N	77deg.39'9.0" W	100	Robert Thornhill	356	30	5	2011
NCSC	Rhynchospora latifolia	Cyperaceae	Monocots	sensu Weakley 2012	U.S.A.	NC	Pender	in large savanna immediately south of intersection of Flo Road and Fill Road	Wet Loamy Pine Savanna (sensu Schafale 2012)	frequent	8 m. msl	34deg.34'54.7" N	77deg.39'9.0" W	100	Robert Thornhill	451	9	6	2011
NCSC	Rhynchospora macrostachya Torr. ex A. Gray	Cyperaceae	Monocots	sensu Weakley 2012	U.S.A.	NC	Pender	in borrow pit in Spodosol savanna/flatwood matrix on east side of Half Moon Road, approximately 1.2 km southwest of intersection of Half Moon Road and Flo Road	borrow pit in pine savanna (Sandy Pine Savanna (Typic subtype) sensu Schafale 2012	occasional	9 m. msl	34deg.35'1.3" N	77deg.40'31.6" W	20	Robert Thornhill	918	19	8	2011		y
NCSC	Rhynchospora microcarpa Baldwin ex A. Gray	Cyperaceae	Monocots	sensu Weakley 2012	U.S.A.	NC	Pender		Very Wet Loamy Pine Savanna (sensu Schafale 2012)					50	Robert Thornhill	517	10	6	2011
NCSC	Rhynchospora microcarpa Baldwin ex A. Gray	Cyperaceae	Monocots	sensu Weakley 2012	U.S.A.	NC	Pender		Very Wet Loamy Pine Savanna (sensu Schafale 2012)	occasional				50	Robert Thornhill	731	21	7	2011
NCSC	Rhynchospora mixta Britton	Cyperaceae	Monocots	sensu Weakley 2012	U.S.A.	NC	Pender	just north of Flo Road, approximately 1.2 km east of intersection with Alligator Lake Road	Coastal Plain Small Stream Swamp (?) sensu Schafale 2012	occasional	9 m. msl	34deg.34'47.5" N	77deg.37'53.7" W	50	Robert Thornhill	1407	15	6	2012			just north of Flo Road, approximately .75 mi east of intersection with Alligator Lake Road
NCSC	Rhynchospora nitens (Vahl) A. Gray	Cyperaceae	Monocots	sensu Weakley 2012	U.S.A.	NC	Pender	in borrow pit near savanna immediately south of intersection of Flo Road and Fill Road	borrow pit in pine savanna (Wet Loamy Pine Savanna sensu Schafale 2012)		8 m. msl	34deg.34'54.7" N	77deg.39'9.0" W	100	Robert Thornhill	931	19	8	2011
NCSC	Rhynchospora nitens (Vahl) A. Gray	Cyperaceae	Monocots	sensu Weakley 2012	U.S.A.	NC	Pender	in Spodosol savanna on east side of Half Moon Road, 0.5-1.5 km southwest of intersection of Half Moon Road and Flo Road	Sandy Pine Savanna (Typic subtype) sensu Schafale 2012		9 m. msl	34deg.35'15.7" N	77deg.40'16.0" W	500	Robert Thornhill	17	21	8	2010
NCSC	Rhynchospora pallida M.A. Curtis	Cyperaceae	Monocots	sensu Weakley 2012	U.S.A.	NC	Pender	in pine savannas along Flo Road, approximately 0.4-1.2 km southeast of junction with Half Moon Road	Sandy Pine Savanna (Rush Featherling subtype) sensu Schafale 2012		9 m. msl	34deg.35'11.9" N	77deg.39'45.9" W	400	Robert Thornhill	14	21	8	2010
NCSC	Rhynchospora pallida M.A. Curtis	Cyperaceae	Monocots	sensu Weakley 2012	U.S.A.	NC	Pender	in pine savannas along Flo Road, approximately 0.4-1.2 km southeast of junction with Half Moon Road	Sandy Pine Savanna (Rush Featherling subtype) sensu Schafale 2012		9 m. msl	34deg.35'11.9" N	77deg.39'45.9" W	400	Robert Thornhill	14	21	8	2010
NCSC	Rhynchospora pallida M.A. Curtis	Cyperaceae	Monocots	sensu Weakley 2012	U.S.A.	NC	Pender	in pine savannas along Flo Road, approximately 0.4-1.2 km southeast of junction with Half Moon Road	Sandy Pine Savanna (Rush Featherling subtype) sensu Schafale 2012	occasional	9 m. msl	34deg.35'11.9" N	77deg.39'45.9" W	400	Robert Thornhill	663	14	7	2011
NCSC	Rhynchospora pinetorum Britton & Small	Cyperaceae	Monocots	sensu Weakley 2012	U.S.A.	NC	Pender		Very Wet Loamy Pine Savanna (sensu Schafale 2012)					50	Robert Thornhill	515	10	6	2011
NCSC	Rhynchospora plumosa Elliott	Cyperaceae	Monocots	sensu Weakley 2012	U.S.A.	NC	Pender	in large savanna immediately south of intersection of Flo Road and Fill Road	Wet Loamy Pine Savanna (sensu Schafale 2012)		8 m. msl	34deg.34'54.7" N	77deg.39'9.0" W	100	Robert Thornhill	313	30	5	2011
NCSC	Rhynchospora plumosa Elliott	Cyperaceae	Monocots	sensu Weakley 2012	U.S.A.	NC	Pender	in pine savanna on northeast corner of intersection of Flo Road and Fill Road	Very Wet Loamy Pine Savanna (sensu Schafale 2012)	occasional	8 m. msl	34deg.35'0.1" N	77deg.38'59.2" W	50	Robert Thornhill	772	3	8	2011
NCSC	Rhynchospora plumosa Elliott	Cyperaceae	Monocots	sensu Weakley 2012	U.S.A.	NC	Pender	in pine savanna on northeast corner of intersection of Flo Road and Fill Road	Very Wet Loamy Pine Savanna (sensu Schafale 2012)	?	8 m. msl	34deg.35'0.1" N	77deg.38'59.2" W	50	Robert Thornhill	929	19	8	2011
NCSC	Rhynchospora plumosa Elliott	Cyperaceae	Monocots	sensu Weakley 2012	U.S.A.	NC	Pender	in savanna .18 km south of Flo Road at a point approximately 0.3km east of intersection of Flo Road and Fill Road	Very Wet Loamy Pine Savanna (sensu Schafale 2012)		8 m. msl	34deg.34'50.5" N	77deg.38'46.6" W	50	Robert Thornhill	443	9	6	2011
NCSC	Rhynchospora plumosa Elliott	Cyperaceae	Monocots	sensu Weakley 2012	U.S.A.	NC	Pender	in savanna on east side of Alligator Lake Road, immediately south of junction with Flo Road	Very Wet Loamy Pine Savanna (sensu Schafale 2012)		8 m. msl	34deg.34'54.2" N	77deg.38'38.5" W	50	Robert Thornhill	726	21	7	2011
NCSC	Rhynchospora plumosa Elliott	Cyperaceae	Monocots	sensu Weakley 2012	U.S.A.	NC	Pender	in savanna on east side of Alligator Lake Road, immediately south of junction with Flo Road	Very Wet Loamy Pine Savanna (sensu Schafale 2012)		8 m. msl	34deg.34'54.2" N	77deg.38'38.5" W	50	Robert Thornhill	726	21	7	2011
NCSC	Rhynchospora plumosa Elliott	Cyperaceae	Monocots	sensu Weakley 2012	U.S.A.	NC	Pender	in large savanna immediately south of intersection of Flo Road and Fill Road	Wet Loamy Pine Savanna (sensu Schafale 2012)		8 m. msl	34deg.34'54.7" N	77deg.39'9.0" W	100	Robert Thornhill	357	30	5	2011
NCSC	Rhynchospora plumosa Elliott	Cyperaceae	Monocots	sensu Weakley 2012	U.S.A.	NC	Pender	in large savanna immediately south of intersection of Flo Road and Fill Road	Wet Loamy Pine Savanna (sensu Schafale 2012)		8 m. msl	34deg.34'54.7" N	77deg.39'9.0" W	100	Robert Thornhill	467	9	6	2011
NCSC	Rhynchospora plumosa Elliott	Cyperaceae	Monocots	sensu Weakley 2012	U.S.A.	NC	Pender	in large savanna immediately south of intersection of Flo Road and Fill Road	Wet Loamy Pine Savanna (sensu Schafale 2012)		8 m. msl	34deg.34'54.7" N	77deg.39'9.0" W	100	Robert Thornhill	468	9	6	2011
NCSC	Rhynchospora plumosa Elliott	Cyperaceae	Monocots	sensu Weakley 2012	U.S.A.	NC	Pender	in large savanna immediately south of intersection of Flo Road and Fill Road	Wet Loamy Pine Savanna (sensu Schafale 2012)	occasional	8 m. msl	34deg.34'54.7" N	77deg.39'9.0" W	100	Robert Thornhill	778	3	8	2011
NCSC	Rhynchospora pusilla Chapm. ex M.A. Curtis	Cyperaceae	Monocots	sensu Weakley 2012	U.S.A.	NC	Pender	in savanna on east side of Alligator Lake Road, immediately south of junction with Flo Road	Very Wet Loamy Pine Savanna (sensu Schafale 2012)	frequent roadside, savanna edge	8 m. msl	34deg.34'54.2" N	77deg.38'38.5" W	50	Robert Thornhill	860	12	8	2011
NCSC	Rhynchospora pusilla Chapm. ex M.A. Curtis	Cyperaceae	Monocots	sensu Weakley 2012	U.S.A.	NC	Pender	in savanna on east side of Alligator Lake Road, immediately south of junction with Flo Road	Very Wet Loamy Pine Savanna (sensu Schafale 2012)	frequent roadside, savanna edge	8 m. msl	34deg.34'54.2" N	77deg.38'38.5" W	50	Robert Thornhill	566	28	6	2011
NCSC	Rhynchospora pusilla Chapm. ex M.A. Curtis	Cyperaceae	Monocots	sensu Weakley 2012	U.S.A.	NC	Pender	in Spodosol savanna on east side of Half Moon Road, 0.5-1.5 km southwest of intersection of Half Moon Road and Flo Road	Sandy Pine Savanna (Typic subtype) sensu Schafale 2012		9 m. msl	34deg.35'15.7" N	77deg.40'16.0" W	500	Robert Thornhill	24	21	8	2010
NCSC	Rhynchospora pusilla Chapm. ex M.A. Curtis	Cyperaceae	Monocots	sensu Weakley 2012	U.S.A.	NC	Pender	in Spodosol savanna on east side of Half Moon Road, 0.5-1.5 km southwest of intersection of Half Moon Road and Flo Road	Sandy Pine Savanna (Typic subtype) sensu Schafale 2012		9 m. msl	34deg.35'15.7" N	77deg.40'16.0" W	500	Robert Thornhill	504	10	6	2011
NCSC	Rhynchospora pusilla Chapm. ex M.A. Curtis	Cyperaceae	Monocots	sensu Weakley 2012	U.S.A.	NC	Pender	in Spodosol savanna on east side of Half Moon Road, 0.5-1.5 km southwest of intersection of Half Moon Road and Flo Road	Sandy Pine Savanna (Typic subtype) sensu Schafale 2012		9 m. msl	34deg.35'15.7" N	77deg.40'16.0" W	500	Robert Thornhill	507	10	6	2011
NCSC	Rhynchospora pusilla Chapm. ex M.A. Curtis	Cyperaceae	Monocots	sensu Weakley 2012	U.S.A.	NC	Pender	in Spodosol savanna on east side of Half Moon Road, 0.5-1.5 km southwest of intersection of Half Moon Road and Flo Road	Sandy Pine Savanna (Typic subtype) sensu Schafale 2012		9 m. msl	34deg.35'15.7" N	77deg.40'16.0" W	500	Robert Thornhill	507	10	6	2011
NCSC	Rhynchospora rariflora (Michx.) Elliott	Cyperaceae	Monocots	sensu Weakley 2012	U.S.A.	NC	Pender	in savanna on east side of Alligator Lake Road, immediately south of junction with Flo Road	Very Wet Loamy Pine Savanna (sensu Schafale 2012)		8 m. msl	34deg.34'54.2" N	77deg.38'38.5" W	50	Robert Thornhill	1355	11	6	2012			=1353
NCSC	Rhynchospora rariflora (Michx.) Elliott	Cyperaceae	Monocots	sensu Weakley 2012	U.S.A.	NC	Pender	along Alligator Lake Road, 0-0.4 km south of junction with Flo Road	sandy roadside margin, adjacent to pine savanna		8 m. msl	34deg.34'54.5" N	77deg.38'39.9" W	200	Robert Thornhill	579	28	6	2011
NCSC	Rhynchospora rariflora (Michx.) Elliott	Cyperaceae	Monocots	sensu Weakley 2012	U.S.A.	NC	Pender	in savanna on east side of Alligator Lake Road, immediately south of junction with Flo Road	Very Wet Loamy Pine Savanna (sensu Schafale 2012)		8 m. msl	34deg.34'54.2" N	77deg.38'38.5" W	50	Robert Thornhill	516	10	6	2011
NCSC	Rhynchospora rariflora (Michx.) Elliott	Cyperaceae	Monocots	sensu Weakley 2012	U.S.A.	NC	Pender	in savanna on east side of Alligator Lake Road, immediately south of junction with Flo Road	Very Wet Loamy Pine Savanna (sensu Schafale 2012)		8 m. msl	34deg.34'54.2" N	77deg.38'38.5" W	50	Robert Thornhill	1102	16	9	2011
NCSC	Rhynchospora torreyana A. Gray	Cyperaceae	Monocots	sensu Weakley 2012	U.S.A.	NC	Pender	in savanna on east side of Alligator Lake Road, immediately south of junction with Flo Road	Very Wet Loamy Pine Savanna (sensu Schafale 2012)		8 m. msl	34deg.34'54.2" N	77deg.38'38.5" W	50	Robert Thornhill	8	21	8	2010		y
NCSC	Rhynchospora torreyana A. Gray	Cyperaceae	Monocots	sensu Weakley 2012	U.S.A.	NC	Pender	in savanna on east side of Alligator Lake Road, immediately south of junction with Flo Road	Very Wet Loamy Pine Savanna (sensu Schafale 2012)		8 m. msl	34deg.34'54.2" N	77deg.38'38.5" W	50	Robert Thornhill	8	21	8	2010		y
NCSC	Rhynchospora torreyana A. Gray	Cyperaceae	Monocots	sensu Weakley 2012	U.S.A.	NC	Pender	in large savanna immediately south of intersection of Flo Road and Fill Road	Wet Loamy Pine Savanna (sensu Schafale 2012)	occasional	8 m. msl	34deg.34'54.7" N	77deg.39'9.0" W	100	Robert Thornhill	775	3	8	2011
NCSC	Rhynchospora torreyana A. Gray	Cyperaceae	Monocots	sensu Weakley 2012	U.S.A.	NC	Pender	in large savanna immediately south of intersection of Flo Road and Fill Road	Wet Loamy Pine Savanna (sensu Schafale 2012)	occasional	8 m. msl	34deg.34'54.7" N	77deg.39'9.0" W	100	Robert Thornhill	779	3	8	2011
NCSC	Rhynchospora wrightiana Boeck.	Cyperaceae	Monocots	sensu Weakley 2012	U.S.A.	NC	Pender	in Spodosol savanna on east side of Half Moon Road, 0.5-1.5 km southwest of intersection of Half Moon Road and Flo Road	Sandy Pine Savanna (Typic subtype) sensu Schafale 2012		9 m. msl	34deg.35'15.7" N	77deg.40'16.0" W	500	Robert Thornhill	16	21	8	2010
NCSC	Schoenoplectus pungens (Vahl) Palla var. pungens	Cyperaceae	Monocots	sensu Weakley 2012	U.S.A.	NC	Pender	in pine savanna on northeast corner of intersection of Flo Road and Fill Road	Very Wet Loamy Pine Savanna (sensu Schafale 2012)	occasional	8 m. msl	34deg.35'0.1" N	77deg.38'59.2" W	50	Robert Thornhill	767	3	8	2011		y
NCSC	Scirpus cyperinus (L.) Kunth	Cyperaceae	Monocots	sensu Weakley 2012	U.S.A.	NC	Pender	in borrow pit near savanna immediately south of intersection of Flo Road and Fill Road	borrow pit in pine savanna (Wet Loamy Pine Savanna sensu Schafale 2012)	infrequent	8 m. msl	34deg.34'54.7" N	77deg.39'9.0" W	100	Robert Thornhill	1061	9	9	2011
NCSC	Scirpus cyperinus (L.) Kunth	Cyperaceae	Monocots	sensu Weakley 2012	U.S.A.	NC	Pender	30 meters east of Half Moon Road, at a point approximately 1.6 km south of intersection with Flo Road	boggy depression in flatwoods	infrequent	7 m. msl	34deg.34'51.6" N	77deg.40'26.4" W	50	Robert Thornhill	543	21	6	2011			east of Half Moon Road, approximately 1 mi south of intersection with Flo Road
NCSC	Scleria baldwinii (Torr.) Steud.	Cyperaceae	Monocots	sensu Weakley 2012	U.S.A.	NC	Pender		Very Wet Loamy Pine Savanna (sensu Schafale 2012)					50	Robert Thornhill	433	9	6	2011
NCSC	Scleria baldwinii (Torr.) Steud.	Cyperaceae	Monocots	sensu Weakley 2012	U.S.A.	NC	Pender		Very Wet Loamy Pine Savanna (sensu Schafale 2012)					50	Robert Thornhill	576	28	6	2011
NCSC	Scleria baldwinii (Torr.) Steud.	Cyperaceae	Monocots	sensu Weakley 2012	U.S.A.	NC	Pender	in savanna on east side of Alligator Lake Road, immediately south of junction with Flo Road	Very Wet Loamy Pine Savanna (sensu Schafale 2012)	infrequent	8 m. msl	34deg.34'54.2" N	77deg.38'38.5" W	50	Robert Thornhill	1091	16	9	2011
NCSC	Scleria baldwinii (Torr.) Steud.	Cyperaceae	Monocots	sensu Weakley 2012	U.S.A.	NC	Pender	in savanna on east side of Alligator Lake Road, immediately south of junction with Flo Road	Very Wet Loamy Pine Savanna (sensu Schafale 2012)	infrequent	8 m. msl	34deg.34'54.2" N	77deg.38'38.5" W	50	Robert Thornhill	1091	16	9	2011
NCSC	Scleria ciliata Michx. var. ciliata	Cyperaceae	Monocots	sensu Weakley 2012	U.S.A.	NC	Pender	in pine savanna on northeast corner of intersection of Flo Road and Fill Road	Very Wet Loamy Pine Savanna (sensu Schafale 2012)	occasional	8 m. msl	34deg.35'0.1" N	77deg.38'59.2" W	50	Robert Thornhill	1138	7	10	2011
NCSC	Scleria ciliata Michx. var. ciliata	Cyperaceae	Monocots	sensu Weakley 2012	U.S.A.	NC	Pender	in dry ridge approximately .2 km north and then .1 km west from fork in Mule Pen Road (i.e., 2 km west of junction with Williams Road)	Mesic Pine Savanna (Coastal Plain subtype) sensu Schafale 2012	occasional	8 m. msl	34deg.35'41.0" N	77deg.42'25.8" W	50	Robert Thornhill	1318	3	6	2012		y	sandy ridge north of the fork in Mule Pen Road
NCSC	Scleria ciliata Michx. var. ciliata	Cyperaceae	Monocots	sensu Weakley 2012	U.S.A.	NC	Pender	in ridge approximately .2 km north and then .1 km west from fork in Mule Pen Road (i.e., 2 km west of junction with Williams Road)	Wet Pine Flatwoods (Typic subtype ) sensu Schafale 2012	occasional	8 m. msl	34deg.35'41.0" N	77deg.42'25.8" W	50	Robert Thornhill	1514	14	8	2012			sandy ridge north of the fork in Mule Pen Road
NCSC	Scleria minor (Britton) W. Stone	Cyperaceae	Monocots	sensu Weakley 2012	U.S.A.	NC	Pender	in powerline cut between Bug Ridge Road and Flo Road	Wet Loamy Pine Savanna (sensu Schafale 2012)	infrequent	8 m. msl	34deg.34'56.3" N	77deg.38'48.6" W	50	Robert Thornhill	1502	3	8	2012			in powerline cut between Bug Ridge Road and Flo Road
NCSC	Scleria minor (Britton) W. Stone	Cyperaceae	Monocots	sensu Weakley 2012	U.S.A.	NC	Pender	in large savanna immediately south of intersection of Flo Road and Fill Road	Wet Loamy Pine Savanna (sensu Schafale 2012)		8 m. msl	34deg.34'54.7" N	77deg.39'9.0" W	100	Robert Thornhill	786	3	8	2011
NCSC	Scleria minor (Britton) W. Stone	Cyperaceae	Monocots	sensu Weakley 2012	U.S.A.	NC	Pender	in large savanna immediately south of intersection of Flo Road and Fill Road	Wet Loamy Pine Savanna (sensu Schafale 2012)	infrequent	8 m. msl	34deg.34'54.7" N	77deg.39'9.0" W	100	Robert Thornhill	1406	15	6	2012
NCSC	Scleria muehlenbergii Steud.	Cyperaceae	Monocots	sensu Weakley 2012	U.S.A.	NC	Pender	in pine savanna on northeast corner of intersection of Flo Road and Fill Road	Very Wet Loamy Pine Savanna (sensu Schafale 2012)	occasional	8 m. msl	34deg.35'0.1" N	77deg.38'59.2" W	50	Robert Thornhill	927	19	8	2011
NCSC	Scleria muehlenbergii Steud.	Cyperaceae	Monocots	sensu Weakley 2012	U.S.A.	NC	Pender	in pine savannas along Flo Road, approximately 0.4-1.2 km southeast of junction with Half Moon Road	Sandy Pine Savanna (Rush Featherling subtype) sensu Schafale 2012	occasional	9 m. msl	34deg.35'11.9" N	77deg.39'45.9" W	400	Robert Thornhill	939	26	8	2011
NCSC	Scleria muehlenbergii Steud.	Cyperaceae	Monocots	sensu Weakley 2012	U.S.A.	NC	Pender	in savanna on east side of Alligator Lake Road, immediately south of junction with Flo Road	Very Wet Loamy Pine Savanna (sensu Schafale 2012)	occasional	8 m. msl	34deg.34'54.2" N	77deg.38'38.5" W	50	Robert Thornhill	1104	16	9	2011		y
NCSC	Scleria muehlenbergii Steud.	Cyperaceae	Monocots	sensu Weakley 2012	U.S.A.	NC	Pender	in savanna on east side of Alligator Lake Road, immediately south of junction with Flo Road	Very Wet Loamy Pine Savanna (sensu Schafale 2012)	occasional	8 m. msl	34deg.34'54.2" N	77deg.38'38.5" W	50	Robert Thornhill	1104	16	9	2011		y
NCSC	Scleria pauciflora Muhl. ex Willd. var. caroliniana (Willd.) Alph. Wood	Cyperaceae	Monocots	sensu Weakley 2012	U.S.A.	NC	Pender	in large savanna immediately south of intersection of Flo Road and Fill Road	Wet Loamy Pine Savanna (sensu Schafale 2012)	occasional	8 m. msl	34deg.34'54.7" N	77deg.39'9.0" W	100	Robert Thornhill	1413	15	6	2012
NCSC	Scleria triglomerata Michx.	Cyperaceae	Monocots	sensu Weakley 2012	U.S.A.	NC	Pender	along edge of path and flatwoods, about .4 km southwest of end of Half Moon Road	Wet Pine Flatwoods (Typic subtype ) sensu Schafale 2012	occasional	7 m. msl	34deg.34'30.7" N	77deg.40'29.6" W	200	Robert Thornhill	1360	11	6	2012			approximately .3 mi west of end of Half Moon Road
NCSC	Scleria triglomerata Michx.	Cyperaceae	Monocots	sensu Weakley 2012	U.S.A.	NC	Pender	in grown-over flatwoods 50 meters south of Mule Pen Road, approximately 2.4 km west of junction with Williams Road	Wet Pine Flatwoods (Typic subtype ) sensu Schafale 2012	occasional	7 m. msl	34deg.35'21.2" N	77deg.42'33.5" W	50	Robert Thornhill	1321	3	6	2012			just south of Mule Pen Road, approximately 1.5 miles past intersection of Mule Pen Road and Williams Road
NCSC	Scleria triglomerata Michx.	Cyperaceae	Monocots	sensu Weakley 2012	U.S.A.	NC	Pender	in grown-over flatwoods 50 meters south of Mule Pen Road, approximately 2.4 km west of junction with Williams Road	Wet Pine Flatwoods (Typic subtype ) sensu Schafale 2012	occasional	7 m. msl	34deg.35'21.2" N	77deg.42'33.5" W	50	Robert Thornhill	1322	3	6	2012		y	just south of Mule Pen Road, approximately 1.5 miles past intersection of Mule Pen Road and Williams Road
NCSC	Scleria triglomerata Michx.	Cyperaceae	Monocots	sensu Weakley 2012	U.S.A.	NC	Pender	in grown-over flatwoods 50 meters south of Mule Pen Road, approximately 2.4 km west of junction with Williams Road	Wet Pine Flatwoods (Typic subtype ) sensu Schafale 2012	occasional	7 m. msl	34deg.35'21.2" N	77deg.42'33.5" W	50	Robert Thornhill	1323	3	6	2012			near border of Shaken Creek swamp south of Mule Pen Road, approximately 1.5 miles past intersection of Mule Pen Road and Williams Road; originally labeled as S. flaccida
NCSC	Dioscorea villosa L.	Dioscoreaceae	Monocots	sensu Weakley 2012	U.S.A.	NC	Pender	in savanna on east side of Alligator Lake Road, immediately south of junction with Flo Road	Very Wet Loamy Pine Savanna (sensu Schafale 2012)	rare	8 m. msl	34deg.34'54.2" N	77deg.38'38.5" W	50	Robert Thornhill	975	26	8	2011		y
NCSC	Eriocaulon decangulare L. var. decangulare	Eriocaulaceae	Monocots	sensu Weakley 2012	U.S.A.	NC	Pender	in pine savannas along Flo Road, approximately 0.4-1.2 km southeast of junction with Half Moon Road	Sandy Pine Savanna (Rush Featherling subtype) sensu Schafale 2012	frequent	9 m. msl	34deg.35'11.9" N	77deg.39'45.9" W	400	Robert Thornhill	662	14	7	2011		y
NCSC	Eriocaulon decangulare L. var. decangulare	Eriocaulaceae	Monocots	sensu Weakley 2012	U.S.A.	NC	Pender	in pine savannas along Flo Road, approximately 0.4-1.2 km southeast of junction with Half Moon Road	Sandy Pine Savanna (Rush Featherling subtype) sensu Schafale 2012	occasional	9 m. msl	34deg.35'11.9" N	77deg.39'45.9" W	400	Robert Thornhill	499	10	6	2011
NCSC	Eriocaulon decangulare L. var. decangulare	Eriocaulaceae	Monocots	sensu Weakley 2012	U.S.A.	NC	Pender	in pine savannas along Flo Road, approximately 0.4-1.2 km southeast of junction with Half Moon Road	Sandy Pine Savanna (Rush Featherling subtype) sensu Schafale 2012	frequent	9 m. msl	34deg.35'11.9" N	77deg.39'45.9" W	400	Robert Thornhill	660	14	7	2011
NCSC	Eriocaulon decangulare L. var. decangulare	Eriocaulaceae	Monocots	sensu Weakley 2012	U.S.A.	NC	Pender	in pine savannas along Flo Road, approximately 0.4-1.2 km southeast of junction with Half Moon Road	Sandy Pine Savanna (Rush Featherling subtype) sensu Schafale 2012	occasional	9 m. msl	34deg.35'11.9" N	77deg.39'45.9" W	400	Robert Thornhill	802	4	8	2011
NCSC	Eriocaulon decangulare L. var. decangulare	Eriocaulaceae	Monocots	sensu Weakley 2012	U.S.A.	NC	Pender	in savanna .18 km south of Flo Road at a point approximately 0.3km east of intersection of Flo Road and Fill Road	Very Wet Loamy Pine Savanna (sensu Schafale 2012)	occasional	8 m. msl	34deg.34'50.5" N	77deg.38'46.6" W	50	Robert Thornhill	437	9	6	2011
NCSC	Eriocaulon decangulare L. var. decangulare	Eriocaulaceae	Monocots	sensu Weakley 2012	U.S.A.	NC	Pender	in Spodosol savanna on east side of Half Moon Road, 0.5-1.5 km southwest of intersection of Half Moon Road and Flo Road	Sandy Pine Savanna (Typic subtype) sensu Schafale 2012	infrequent	9 m. msl	34deg.35'15.7" N	77deg.40'16.0" W	500	Robert Thornhill	512	10	6	2011
NCSC	Eriocaulon decangulare L. var. decangulare	Eriocaulaceae	Monocots	sensu Weakley 2012	U.S.A.	NC	Pender	in Spodosol savanna on east side of Half Moon Road, 0.5-1.5 km southwest of intersection of Half Moon Road and Flo Road	Sandy Pine Savanna (Typic subtype) sensu Schafale 2012	occasional	9 m. msl	34deg.35'15.7" N	77deg.40'16.0" W	500	Robert Thornhill	717	21	7	2011
NCSC	Eriocaulon decangulare L. var. decangulare	Eriocaulaceae	Monocots	sensu Weakley 2012	U.S.A.	NC	Pender	in large savanna immediately south of intersection of Flo Road and Fill Road	Wet Loamy Pine Savanna (sensu Schafale 2012)	occasional	8 m. msl	34deg.34'54.7" N	77deg.39'9.0" W	100	Robert Thornhill	466	9	6	2011		y
NCSC	Eriocaulon decangulare L. var. decangulare	Eriocaulaceae	Monocots	sensu Weakley 2012	U.S.A.	NC	Pender	in large savanna immediately south of intersection of Flo Road and Fill Road	Wet Loamy Pine Savanna (sensu Schafale 2012)	frequent	8 m. msl	34deg.34'54.7" N	77deg.39'9.0" W	100	Robert Thornhill	634	14	7	2011
NCSC	Lachnocaulon anceps (Walter) Morong	Eriocaulaceae	Monocots	sensu Weakley 2012	U.S.A.	NC	Pender	in pine savannas along Flo Road, approximately 0.4-1.2 km southeast of junction with Half Moon Road	Sandy Pine Savanna (Rush Featherling subtype) sensu Schafale 2012	frequent	9 m. msl	34deg.35'11.9" N	77deg.39'45.9" W	400	Robert Thornhill	498	10	6	2011
NCSC	Lachnocaulon anceps (Walter) Morong	Eriocaulaceae	Monocots	sensu Weakley 2012	U.S.A.	NC	Pender	in pine savannas along Flo Road, approximately 0.4-1.2 km southeast of junction with Half Moon Road	Sandy Pine Savanna (Rush Featherling subtype) sensu Schafale 2012	frequent	9 m. msl	34deg.35'11.9" N	77deg.39'45.9" W	400	Robert Thornhill	586	14	7	2011
NCSC	Lachnocaulon anceps (Walter) Morong	Eriocaulaceae	Monocots	sensu Weakley 2012	U.S.A.	NC	Pender	in savanna .18 km south of Flo Road at a point approximately 0.3km east of intersection of Flo Road and Fill Road	Very Wet Loamy Pine Savanna (sensu Schafale 2012)	frequent	8 m. msl	34deg.34'50.5" N	77deg.38'46.6" W	50	Robert Thornhill	438	9	6	2011
NCSC	Lachnocaulon anceps (Walter) Morong	Eriocaulaceae	Monocots	sensu Weakley 2012	U.S.A.	NC	Pender	in savanna .18 km south of Flo Road at a point approximately 0.3km east of intersection of Flo Road and Fill Road	Very Wet Loamy Pine Savanna (sensu Schafale 2012)	frequent	8 m. msl	34deg.34'50.5" N	77deg.38'46.6" W	50	Robert Thornhill	438	9	6	2011
NCSC	Lachnocaulon anceps (Walter) Morong	Eriocaulaceae	Monocots	sensu Weakley 2012	U.S.A.	NC	Pender	in savanna .18 km south of Flo Road at a point approximately 0.3km east of intersection of Flo Road and Fill Road	Very Wet Loamy Pine Savanna (sensu Schafale 2012)	frequent	8 m. msl	34deg.34'50.5" N	77deg.38'46.6" W	50	Robert Thornhill	464	9	6	2011
NCSC	Lachnocaulon anceps (Walter) Morong	Eriocaulaceae	Monocots	sensu Weakley 2012	U.S.A.	NC	Pender	in large savanna immediately south of intersection of Flo Road and Fill Road	Wet Loamy Pine Savanna (sensu Schafale 2012)	frequent	8 m. msl	34deg.34'54.7" N	77deg.39'9.0" W	100	Robert Thornhill	338	30	5	2011
NCSC	Lachnocaulon anceps (Walter) Morong	Eriocaulaceae	Monocots	sensu Weakley 2012	U.S.A.	NC	Pender	in large savanna immediately south of intersection of Flo Road and Fill Road	Wet Loamy Pine Savanna (sensu Schafale 2012)	frequent	8 m. msl	34deg.34'54.7" N	77deg.39'9.0" W	100	Robert Thornhill	452	9	6	2011
NCSC	Lachnocaulon anceps (Walter) Morong	Eriocaulaceae	Monocots	sensu Weakley 2012	U.S.A.	NC	Pender	in savanna immediately south of Flo Road, approximately 0.3km east of intersection of Flo Road and Fill Road	Wet Loamy Pine Savanna (sensu Schafale 2012)	frequent	8 m. msl	34deg.34'56.3" N	77deg.38'48.6" W	50	Robert Thornhill	446	9	6	2011		y
NCSC	Lachnanthes caroliniana (Lam.) Dandy	Haemodoraceae	Monocots	sensu Weakley 2012	U.S.A.	NC	Pender	in pine savannas along Flo Road, approximately 0.4-1.2 km southeast of junction with Half Moon Road	Sandy Pine Savanna (Rush Featherling subtype) sensu Schafale 2012	frequent in wet depressions	9 m. msl	34deg.35'11.9" N	77deg.39'45.9" W	400	Robert Thornhill	493	10	6	2011		y
NCSC	Lachnanthes caroliniana (Lam.) Dandy	Haemodoraceae	Monocots	sensu Weakley 2012	U.S.A.	NC	Pender	in savanna on east side of Alligator Lake Road, immediately south of junction with Flo Road	Very Wet Loamy Pine Savanna (sensu Schafale 2012)	frequent wetepressions	8 m. msl	34deg.34'54.2" N	77deg.38'38.5" W	50	Robert Thornhill	496	10	6	2011
NCSC	Lachnanthes caroliniana (Lam.) Dandy	Haemodoraceae	Monocots	sensu Weakley 2012	U.S.A.	NC	Pender	in Spodosol savanna on east side of Half Moon Road, 0.5-1.5 km southwest of intersection of Half Moon Road and Flo Road	Sandy Pine Savanna (Typic subtype) sensu Schafale 2012	frequent in wet depressions	9 m. msl	34deg.35'15.7" N	77deg.40'16.0" W	500	Robert Thornhill	494	10	6	2011
NCSC	Lachnanthes caroliniana (Lam.) Dandy	Haemodoraceae	Monocots	sensu Weakley 2012	U.S.A.	NC	Pender	in large savanna immediately south of intersection of Flo Road and Fill Road	Wet Loamy Pine Savanna (sensu Schafale 2012)	frequent	8 m. msl	34deg.34'54.7" N	77deg.39'9.0" W	100	Robert Thornhill	370	30	5	2011
NCSC	Lachnanthes caroliniana (Lam.) Dandy	Haemodoraceae	Monocots	sensu Weakley 2012	U.S.A.	NC	Pender	in large savanna immediately south of intersection of Flo Road and Fill Road	Wet Loamy Pine Savanna (sensu Schafale 2012)	frequent	8 m. msl	34deg.34'54.7" N	77deg.39'9.0" W	100	Robert Thornhill	495	10	6	2011
NCSC	Lachnanthes caroliniana (Lam.) Dandy	Haemodoraceae	Monocots	sensu Weakley 2012	U.S.A.	NC	Pender	in savanna immediately south of Flo Road, approximately 0.3km east of intersection of Flo Road and Fill Road	Wet Loamy Pine Savanna (sensu Schafale 2012)	frequent wetepressions	8 m. msl	34deg.34'56.3" N	77deg.38'48.6" W	50	Robert Thornhill	447	9	6	2011		y
NCSC	Chamaelirium luteum (L.) A. Gray	Heloniadaceae	Monocots	sensu Weakley 2012	U.S.A.	NC	Pender		Mesic Pine Savanna (Coastal Plain subtype) sensu Schafale 2012	infrequent				20	Robert Thornhill	1274	2	5	2012		y
NCSC	Hypoxis hirsuta (L.) Coville	Hypoxidaceae	Monocots	sensu Weakley 2012	U.S.A.	NC	Pender	in savanna on east side of Alligator Lake Road, immediately south of junction with Flo Road	Very Wet Loamy Pine Savanna (sensu Schafale 2012)		8 m. msl	34deg.34'54.2" N	77deg.38'38.5" W	50	Robert Thornhill	105	16	4	2011		y
NCSC	Hypoxis hirsuta (L.) Coville	Hypoxidaceae	Monocots	sensu Weakley 2012	U.S.A.	NC	Pender	in savanna on east side of Alligator Lake Road, immediately south of junction with Flo Road	Very Wet Loamy Pine Savanna (sensu Schafale 2012)		8 m. msl	34deg.34'54.2" N	77deg.38'38.5" W	50	Robert Thornhill	254	15	5	2011
NCSC	Hypoxis hirsuta (L.) Coville	Hypoxidaceae	Monocots	sensu Weakley 2012	U.S.A.	NC	Pender	in large savanna immediately south of intersection of Flo Road and Fill Road	Wet Loamy Pine Savanna (sensu Schafale 2012)		8 m. msl	34deg.34'54.7" N	77deg.39'9.0" W	100	Robert Thornhill	140	16	4	2011
NCSC	Hypoxis sessilis L.	Hypoxidaceae	Monocots	sensu Weakley 2012	U.S.A.	NC	Pender		Very Wet Loamy Pine Savanna (sensu Schafale 2012)					50	Robert Thornhill	218	1	5	2011
NCSC	Hypoxis sessilis L.	Hypoxidaceae	Monocots	sensu Weakley 2012	U.S.A.	NC	Pender		Sandy Pine Savanna (Typic subtype) sensu Schafale 2012					500	Robert Thornhill	124	16	4	2011
NCSC	Hypoxis sessilis L.	Hypoxidaceae	Monocots	sensu Weakley 2012	U.S.A.	NC	Pender		Sandy Pine Savanna (Typic subtype) sensu Schafale 2012					500	Robert Thornhill	176	22	4	2011
NCSC	Hypoxis sessilis L.	Hypoxidaceae	Monocots	sensu Weakley 2012	U.S.A.	NC	Pender		Wet Loamy Pine Savanna (sensu Schafale 2012)					100	Robert Thornhill	295	15	5	2011
NCSC	Hypoxis wrightii (Baker) Brackett	Hypoxidaceae	Monocots	sensu Weakley 2012	U.S.A.	NC	Pender	in Spodosol savanna on east side of Half Moon Road, 0.5-1.5 km southwest of intersection of Half Moon Road and Flo Road	Sandy Pine Savanna (Typic subtype) sensu Schafale 2012		9 m. msl	34deg.35'15.7" N	77deg.40'16.0" W	500	Robert Thornhill	36	21	8	2010
NCSC	Hypoxis wrightii (Baker) Brackett	Hypoxidaceae	Monocots	sensu Weakley 2012	U.S.A.	NC	Pender	in Spodosol savanna on east side of Half Moon Road, 0.5-1.5 km southwest of intersection of Half Moon Road and Flo Road	Sandy Pine Savanna (Typic subtype) sensu Schafale 2012		9 m. msl	34deg.35'15.7" N	77deg.40'16.0" W	500	Robert Thornhill	157	22	4	2011
NCSC	Hypoxis wrightii (Baker) Brackett	Hypoxidaceae	Monocots	sensu Weakley 2012	U.S.A.	NC	Pender	in Spodosol savanna on east side of Half Moon Road, 0.5-1.5 km southwest of intersection of Half Moon Road and Flo Road	Sandy Pine Savanna (Typic subtype) sensu Schafale 2012		9 m. msl	34deg.35'15.7" N	77deg.40'16.0" W	500	Robert Thornhill	157	22	4	2011
NCSC	Hypoxis wrightii (Baker) Brackett	Hypoxidaceae	Monocots	sensu Weakley 2012	U.S.A.	NC	Pender	in large savanna immediately south of intersection of Flo Road and Fill Road	Wet Loamy Pine Savanna (sensu Schafale 2012)		8 m. msl	34deg.34'54.7" N	77deg.39'9.0" W	100	Robert Thornhill	244	15	5	2011
NCSC	Iris tridentata Pursh	Iridaceae	Monocots	sensu Weakley 2012	U.S.A.	NC	Pender	in pine savannas along Flo Road, approximately 0.4-1.2 km southeast of junction with Half Moon Road	Sandy Pine Savanna (Rush Featherling subtype) sensu Schafale 2012	frequent	9 m. msl	34deg.35'11.9" N	77deg.39'45.9" W	400	Robert Thornhill	380	31	5	2011
NCSC	Iris tridentata Pursh	Iridaceae	Monocots	sensu Weakley 2012	U.S.A.	NC	Pender	in pine savannas along Flo Road, approximately 0.4-1.2 km southeast of junction with Half Moon Road	Sandy Pine Savanna (Rush Featherling subtype) sensu Schafale 2012	frequent	9 m. msl	34deg.35'11.9" N	77deg.39'45.9" W	400	Robert Thornhill	1300	22	5	2012
NCSC	Iris tridentata Pursh	Iridaceae	Monocots	sensu Weakley 2012	U.S.A.	NC	Pender	in savanna .18 km south of Flo Road at a point approximately 0.3km east of intersection of Flo Road and Fill Road	Very Wet Loamy Pine Savanna (sensu Schafale 2012)	frequent	8 m. msl	34deg.34'50.5" N	77deg.38'46.6" W	50	Robert Thornhill	317	30	5	2011		y
NCSC	Iris tridentata Pursh	Iridaceae	Monocots	sensu Weakley 2012	U.S.A.	NC	Pender	in Spodosol savanna on east side of Half Moon Road, 0.5-1.5 km southwest of intersection of Half Moon Road and Flo Road	Sandy Pine Savanna (Typic subtype) sensu Schafale 2012	frequent	9 m. msl	34deg.35'15.7" N	77deg.40'16.0" W	500	Robert Thornhill	384	31	5	2011
NCSC	Iris tridentata Pursh	Iridaceae	Monocots	sensu Weakley 2012	U.S.A.	NC	Pender	in large savanna immediately south of intersection of Flo Road and Fill Road	Wet Loamy Pine Savanna (sensu Schafale 2012)	frequent	8 m. msl	34deg.34'54.7" N	77deg.39'9.0" W	100	Robert Thornhill	351	30	5	2011
NCSC	Iris verna L. var. verna	Iridaceae	Monocots	sensu Weakley 2012	U.S.A.	NC	Pender	in pine savannas along Flo Road, approximately 0.4-1.2 km southeast of junction with Half Moon Road	Sandy Pine Savanna (Rush Featherling subtype) sensu Schafale 2012		9 m. msl	34deg.35'11.9" N	77deg.39'45.9" W	400	Robert Thornhill	99	20	3	2011
NCSC	Iris verna L. var. verna	Iridaceae	Monocots	sensu Weakley 2012	U.S.A.	NC	Pender	in savanna on east side of Alligator Lake Road, immediately south of junction with Flo Road	Very Wet Loamy Pine Savanna (sensu Schafale 2012)		8 m. msl	34deg.34'54.2" N	77deg.38'38.5" W	50	Robert Thornhill	76	20	3	2011		y
NCSC	Iris verna L. var. verna	Iridaceae	Monocots	sensu Weakley 2012	U.S.A.	NC	Pender	in savanna on east side of Alligator Lake Road, immediately south of junction with Flo Road	Very Wet Loamy Pine Savanna (sensu Schafale 2012)		8 m. msl	34deg.34'54.2" N	77deg.38'38.5" W	50	Robert Thornhill	76	20	3	2011		y
NCSC	Iris verna L. var. verna	Iridaceae	Monocots	sensu Weakley 2012	U.S.A.	NC	Pender	in savanna on east side of Alligator Lake Road, immediately south of junction with Flo Road	Very Wet Loamy Pine Savanna (sensu Schafale 2012)		8 m. msl	34deg.34'54.2" N	77deg.38'38.5" W	50	Robert Thornhill	77	20	3	2011		y
NCSC	Iris verna L. var. verna	Iridaceae	Monocots	sensu Weakley 2012	U.S.A.	NC	Pender	in savanna on east side of Alligator Lake Road, immediately south of junction with Flo Road	Very Wet Loamy Pine Savanna (sensu Schafale 2012)		8 m. msl	34deg.34'54.2" N	77deg.38'38.5" W	50	Robert Thornhill	77	20	3	2011		y
NCSC	Iris verna L. var. verna	Iridaceae	Monocots	sensu Weakley 2012	U.S.A.	NC	Pender	in Spodosol savanna on east side of Half Moon Road, 0.5-1.5 km southwest of intersection of Half Moon Road and Flo Road	Sandy Pine Savanna (Typic subtype) sensu Schafale 2012		9 m. msl	34deg.35'15.7" N	77deg.40'16.0" W	500	Robert Thornhill	100	20	3	2011
NCSC	Iris verna L. var. verna	Iridaceae	Monocots	sensu Weakley 2012	U.S.A.	NC	Pender	in savanna immediately south of Flo Road, approximately 0.3km east of intersection of Flo Road and Fill Road	Wet Loamy Pine Savanna (sensu Schafale 2012)		8 m. msl	34deg.34'56.3" N	77deg.38'48.6" W	50	Robert Thornhill	89	20	3	2011		y
NCSC	Iris virginica L. var. virginica	Iridaceae	Monocots	sensu Weakley 2012	U.S.A.	NC	Pender	in large savanna immediately south of intersection of Flo Road and Fill Road	Wet Loamy Pine Savanna (sensu Schafale 2012)		8 m. msl	34deg.34'54.7" N	77deg.39'9.0" W	100	Robert Thornhill	241	15	5	2011		y
NCSC	Iris virginica L. var. virginica	Iridaceae	Monocots	sensu Weakley 2012	U.S.A.	NC	Pender	in large savanna immediately south of intersection of Flo Road and Fill Road	Wet Loamy Pine Savanna (sensu Schafale 2012)		8 m. msl	34deg.34'54.7" N	77deg.39'9.0" W	100	Robert Thornhill	241	15	5	2011		y
NCSC	Sisyrinchium angustifolium Mill.	Iridaceae	Monocots	sensu Weakley 2012	U.S.A.	NC	Pender	in savanna immediately south of Flo Road, approximately 0.3km east of intersection of Flo Road and Fill Road	Wet Loamy Pine Savanna (sensu Schafale 2012)		8 m. msl	34deg.34'56.3" N	77deg.38'48.6" W	50	Robert Thornhill	195	1	5	2011
NCSC	Sisyrinchium angustifolium Mill.	Iridaceae	Monocots	sensu Weakley 2012	U.S.A.	NC	Pender	in powerline right-of-way, approximately .25 km north of Shaken Creek	boggy savanna in powerline right-of-way	occasional	6 m. msl	34deg.34'51.4" N	77deg.41'25.7" W	20	Robert Thornhill	1401	15	6	2012			in powerline cut, approximately .3 mi north of Shaken Creek
NCSC	Sisyrinchium atlanticum E.P. Bicknell	Iridaceae	Monocots	sensu Weakley 2012	U.S.A.	NC	Pender	in savanna immediately south of Flo Road, approximately 0.3km east of intersection of Flo Road and Fill Road	Wet Loamy Pine Savanna (sensu Schafale 2012)	frequent	8 m. msl	34deg.34'56.3" N	77deg.38'48.6" W	50	Robert Thornhill	372	30	5	2011
NCSC	Sisyrinchium atlanticum E.P. Bicknell	Iridaceae	Monocots	sensu Weakley 2012	U.S.A.	NC	Pender	in savanna on east side of Alligator Lake Road, immediately south of junction with Flo Road	Very Wet Loamy Pine Savanna (sensu Schafale 2012)		8 m. msl	34deg.34'54.2" N	77deg.38'38.5" W	50	Robert Thornhill	221	1	5	2011
NCSC	Sisyrinchium atlanticum E.P. Bicknell	Iridaceae	Monocots	sensu Weakley 2012	U.S.A.	NC	Pender	in large savanna immediately south of intersection of Flo Road and Fill Road	Wet Loamy Pine Savanna (sensu Schafale 2012)		8 m. msl	34deg.34'54.7" N	77deg.39'9.0" W	100	Robert Thornhill	187	22	4	2011
NCSC	Sisyrinchium atlanticum E.P. Bicknell	Iridaceae	Monocots	sensu Weakley 2012	U.S.A.	NC	Pender	in large savanna immediately south of intersection of Flo Road and Fill Road	Wet Loamy Pine Savanna (sensu Schafale 2012)		8 m. msl	34deg.34'54.7" N	77deg.39'9.0" W	100	Robert Thornhill	394	31	5	2011
NCSC	Sisyrinchium atlanticum E.P. Bicknell	Iridaceae	Monocots	sensu Weakley 2012	U.S.A.	NC	Pender	in savanna immediately south of Flo Road, approximately 0.3km east of intersection of Flo Road and Fill Road	Wet Loamy Pine Savanna (sensu Schafale 2012)		8 m. msl	34deg.34'56.3" N	77deg.38'48.6" W	50	Robert Thornhill	196	1	5	2011
NCSC	Sisyrinchium capillare E.P. Bicknell	Iridaceae	Monocots	sensu Weakley 2012	U.S.A.	NC	Pender	in savanna .18 km south of Flo Road at a point approximately 0.3km east of intersection of Flo Road and Fill Road	Very Wet Loamy Pine Savanna (sensu Schafale 2012)		8 m. msl	34deg.34'50.5" N	77deg.38'46.6" W	50	Robert Thornhill	191	1	5	2011
NCSC	Sisyrinchium capillare E.P. Bicknell	Iridaceae	Monocots	sensu Weakley 2012	U.S.A.	NC	Pender	in savanna .18 km south of Flo Road at a point approximately 0.3km east of intersection of Flo Road and Fill Road	Very Wet Loamy Pine Savanna (sensu Schafale 2012)		8 m. msl	34deg.34'50.5" N	77deg.38'46.6" W	50	Robert Thornhill	192	1	5	2011
NCSC	Sisyrinchium capillare E.P. Bicknell	Iridaceae	Monocots	sensu Weakley 2012	U.S.A.	NC	Pender	in savanna .18 km south of Flo Road at a point approximately 0.3km east of intersection of Flo Road and Fill Road	Very Wet Loamy Pine Savanna (sensu Schafale 2012)		8 m. msl	34deg.34'50.5" N	77deg.38'46.6" W	50	Robert Thornhill	192	1	5	2011
NCSC	Sisyrinchium capillare E.P. Bicknell	Iridaceae	Monocots	sensu Weakley 2012	U.S.A.	NC	Pender	in savanna on east side of Alligator Lake Road, immediately south of junction with Flo Road	Very Wet Loamy Pine Savanna (sensu Schafale 2012)		8 m. msl	34deg.34'54.2" N	77deg.38'38.5" W	50	Robert Thornhill	111	16	4	2011		y
NCSC	Sisyrinchium capillare E.P. Bicknell	Iridaceae	Monocots	sensu Weakley 2012	U.S.A.	NC	Pender	in large savanna immediately south of intersection of Flo Road and Fill Road	Wet Loamy Pine Savanna (sensu Schafale 2012)		8 m. msl	34deg.34'54.7" N	77deg.39'9.0" W	100	Robert Thornhill	138	16	4	2011
NCSC	Sisyrinchium capillare E.P. Bicknell	Iridaceae	Monocots	sensu Weakley 2012	U.S.A.	NC	Pender	in large savanna immediately south of intersection of Flo Road and Fill Road	Wet Loamy Pine Savanna (sensu Schafale 2012)		8 m. msl	34deg.34'54.7" N	77deg.39'9.0" W	100	Robert Thornhill	208	1	5	2011
NCSC	Sisyrinchium capillare E.P. Bicknell	Iridaceae	Monocots	sensu Weakley 2012	U.S.A.	NC	Pender	in savanna immediately south of Flo Road, approximately 0.3km east of intersection of Flo Road and Fill Road	Wet Loamy Pine Savanna (sensu Schafale 2012)		8 m. msl	34deg.34'56.3" N	77deg.38'48.6" W	50	Robert Thornhill	127	16	4	2011		y
NCSC	Sisyrinchium capillare E.P. Bicknell	Iridaceae	Monocots	sensu Weakley 2012	U.S.A.	NC	Pender	in savanna immediately south of Flo Road, approximately 0.3km east of intersection of Flo Road and Fill Road	Wet Loamy Pine Savanna (sensu Schafale 2012)		8 m. msl	34deg.34'56.3" N	77deg.38'48.6" W	50	Robert Thornhill	127	16	4	2011		y
NCSC	Sisyrinchium capillare E.P. Bicknell	Iridaceae	Monocots	sensu Weakley 2012	U.S.A.	NC	Pender	in savanna immediately south of Flo Road, approximately 0.3km east of intersection of Flo Road and Fill Road	Wet Loamy Pine Savanna (sensu Schafale 2012)		8 m. msl	34deg.34'56.3" N	77deg.38'48.6" W	50	Robert Thornhill	194	1	5	2011		y
NCSC	Sisyrinchium rosulatum E.P. Bicknell	Iridaceae	Monocots	sensu Weakley 2012	U.S.A.	NC	Pender	in food plot northwest of intersection of Alligator Lake Road and Flo Road	weedy open area (food plot)	frequent	8 m. msl	34deg.34'59.0" N	77deg.38'46.7" W	100	Robert Thornhill	1259	26	3	2012			food plot north of intersection of Flo Road and Alligator Lake Road
NCSC	Juncus biflorus Elliott	Juncaceae	Monocots	sensu Weakley 2012	U.S.A.	NC	Pender	in savanna on east side of Alligator Lake Road, immediately south of junction with Flo Road	Very Wet Loamy Pine Savanna (sensu Schafale 2012)		8 m. msl	34deg.34'54.2" N	77deg.38'38.5" W	50	Robert Thornhill	853	12	8	2011
NCSC	Juncus biflorus Elliott	Juncaceae	Monocots	sensu Weakley 2012	U.S.A.	NC	Pender	in Spodosol savanna on east side of Half Moon Road, 0.5-1.5 km southwest of intersection of Half Moon Road and Flo Road	Sandy Pine Savanna (Typic subtype) sensu Schafale 2012	occasional	9 m. msl	34deg.35'15.7" N	77deg.40'16.0" W	500	Robert Thornhill	1372	11	6	2012			west side of Half Moon Road, approximately .6 mi south of intersection with Flo Road
NCSC	Juncus biflorus Elliott	Juncaceae	Monocots	sensu Weakley 2012	U.S.A.	NC	Pender	in large savanna immediately south of intersection of Flo Road and Fill Road	Wet Loamy Pine Savanna (sensu Schafale 2012)		8 m. msl	34deg.34'54.7" N	77deg.39'9.0" W	100	Robert Thornhill	455	9	6	2011
NCSC	Juncus biflorus Elliott	Juncaceae	Monocots	sensu Weakley 2012	U.S.A.	NC	Pender	in large savanna immediately south of intersection of Flo Road and Fill Road	Wet Loamy Pine Savanna (sensu Schafale 2012)		8 m. msl	34deg.34'54.7" N	77deg.39'9.0" W	100	Robert Thornhill	461	9	6	2011		y
NCSC	Juncus biflorus Elliott	Juncaceae	Monocots	sensu Weakley 2012	U.S.A.	NC	Pender	in large savanna immediately south of intersection of Flo Road and Fill Road	Wet Loamy Pine Savanna (sensu Schafale 2012)		8 m. msl	34deg.34'54.7" N	77deg.39'9.0" W	100	Robert Thornhill	627	14	7	2011
NCSC	Juncus bufonius L.	Juncaceae	Monocots	sensu Weakley 2012	U.S.A.	NC	Pender	along Flo Road, near intersection with Fill Road		frequent along road	8 m. msl	34deg.34'54.7" N	77deg.39'9.0" W	200	Robert Thornhill	297	15	5	2011
NCSC	Juncus canadensis J. Gay ex Laharpe	Juncaceae	Monocots	sensu Weakley 2012	U.S.A.	NC	Pender	in Spodosol savanna on east side of Half Moon Road, 0.5-1.5 km southwest of intersection of Half Moon Road and Flo Road	Sandy Pine Savanna (Typic subtype) sensu Schafale 2012		9 m. msl	34deg.35'15.7" N	77deg.40'16.0" W	500	Robert Thornhill	19	21	8	2010
NCSC	Juncus canadensis J. Gay ex Laharpe	Juncaceae	Monocots	sensu Weakley 2012	U.S.A.	NC	Pender	in Spodosol savanna on east side of Half Moon Road, 0.5-1.5 km southwest of intersection of Half Moon Road and Flo Road	Sandy Pine Savanna (Typic subtype) sensu Schafale 2012		9 m. msl	34deg.35'15.7" N	77deg.40'16.0" W	500	Robert Thornhill	19	21	8	2010
NCSC	Juncus coriaceus Mack.	Juncaceae	Monocots	sensu Weakley 2012	U.S.A.	NC	Pender	in pine savannas along Flo Road, approximately 0.4-1.2 km southeast of junction with Half Moon Road	Sandy Pine Savanna (Rush Featherling subtype) sensu Schafale 2012		9 m. msl	34deg.35'11.9" N	77deg.39'45.9" W	400	Robert Thornhill	957	26	8	2011
NCSC	Juncus dichotomus Elliott	Juncaceae	Monocots	sensu Weakley 2012	U.S.A.	NC	Pender	along Flo Road, near intersection with Fill Road	sandy roadside margin, adjacent to pine savanna		8 m. msl	34deg.34'56.4" N	77deg.39'8.8" W	200	Robert Thornhill	339	30	5	2011
NCSC	Juncus dichotomus Elliott	Juncaceae	Monocots	sensu Weakley 2012	U.S.A.	NC	Pender	along Flo Road, near intersection with Fill Road	sandy roadside margin, adjacent to pine savanna		8 m. msl	34deg.34'54.7" N	77deg.39'9.0" W	200	Robert Thornhill	340	30	5	2011
NCSC	Juncus dichotomus Elliott	Juncaceae	Monocots	sensu Weakley 2012	U.S.A.	NC	Pender	in savanna on east side of Alligator Lake Road, immediately south of junction with Flo Road	Very Wet Loamy Pine Savanna (sensu Schafale 2012)		8 m. msl	34deg.34'54.2" N	77deg.38'38.5" W	50	Robert Thornhill	575	28	6	2011
NCSC	Juncus dichotomus Elliott	Juncaceae	Monocots	sensu Weakley 2012	U.S.A.	NC	Pender	in large savanna immediately south of intersection of Flo Road and Fill Road	Wet Loamy Pine Savanna (sensu Schafale 2012)		8 m. msl	34deg.34'54.7" N	77deg.39'9.0" W	100	Robert Thornhill	286	15	5	2011
NCSC	Juncus dichotomus Elliott	Juncaceae	Monocots	sensu Weakley 2012	U.S.A.	NC	Pender	in large savanna immediately south of intersection of Flo Road and Fill Road	Wet Loamy Pine Savanna (sensu Schafale 2012)		8 m. msl	34deg.34'54.7" N	77deg.39'9.0" W	100	Robert Thornhill	453	9	6	2011
NCSC	Juncus effusus L. ssp. solutus (Fernald & Wiegand) Hämet-Ahti	Juncaceae	Monocots	sensu Weakley 2012	U.S.A.	NC	Pender	around dog pens on Williams Road, approximately .25 km southwest of hunting lodge	weedy roadside	occasional	8 m. msl	34deg.35'52.9" N	77deg.40'7.3" W	20	Robert Thornhill	1339	3	6	2012			around dog pens on Williams Road
NCSC	Juncus elliottii Chapm.	Juncaceae	Monocots	sensu Weakley 2012	U.S.A.	NC	Pender	along Flo Road, near intersection with Fill Road	sandy roadside margin, adjacent to pine savanna		8 m. msl	34deg.34'56.4" N	77deg.39'8.8" W	200	Robert Thornhill	333	30	5	2011
NCSC	Juncus elliottii Chapm.	Juncaceae	Monocots	sensu Weakley 2012	U.S.A.	NC	Pender	along Flo Road, near intersection with Fill Road	sandy roadside margin, adjacent to pine savanna		8 m. msl	34deg.34'54.7" N	77deg.39'9.0" W	200	Robert Thornhill	336	30	5	2011
NCSC	Juncus marginatus Rostk.	Juncaceae	Monocots	sensu Weakley 2012	U.S.A.	NC	Pender	boggy area in powerline right-of-way, immediately east of hunting lodge on Williams Road	disturbed open area in powerline right-of-way	occasional	7 m. msl	34deg.35'56.8" N	77deg.39'56.5" W	10	Robert Thornhill	1374	11	6	2012			boggy area in powerline cut immediately east of hunting lodge
NCSC	Juncus megacephalus M.A. Curtis	Juncaceae	Monocots	sensu Weakley 2012	U.S.A.	NC	Pender	in savanna on east side of Alligator Lake Road, immediately south of junction with Flo Road	Very Wet Loamy Pine Savanna (sensu Schafale 2012)	frequent	8 m. msl	34deg.34'54.2" N	77deg.38'38.5" W	50	Robert Thornhill	574	28	6	2011
NCSC	Juncus megacephalus M.A. Curtis	Juncaceae	Monocots	sensu Weakley 2012	U.S.A.	NC	Pender	in savanna on east side of Alligator Lake Road, immediately south of junction with Flo Road	Very Wet Loamy Pine Savanna (sensu Schafale 2012)	frequent	8 m. msl	34deg.34'54.2" N	77deg.38'38.5" W	50	Robert Thornhill	405	31	5	2011
NCSC	Juncus megacephalus M.A. Curtis	Juncaceae	Monocots	sensu Weakley 2012	U.S.A.	NC	Pender	in savanna on east side of Alligator Lake Road, immediately south of junction with Flo Road	Very Wet Loamy Pine Savanna (sensu Schafale 2012)	frequent	8 m. msl	34deg.34'54.2" N	77deg.38'38.5" W	50	Robert Thornhill	519	10	6	2011
NCSC	Juncus megacephalus M.A. Curtis	Juncaceae	Monocots	sensu Weakley 2012	U.S.A.	NC	Pender	in savanna on east side of Alligator Lake Road, immediately south of junction with Flo Road	Very Wet Loamy Pine Savanna (sensu Schafale 2012)	frequent	8 m. msl	34deg.34'54.2" N	77deg.38'38.5" W	50	Robert Thornhill	732	21	7	2011
NCSC	Juncus pelocarpus E. Mey.	Juncaceae	Monocots	sensu Weakley 2012	U.S.A.	NC	Pender	in Spodosol savanna on east side of Half Moon Road, 0.5-1.5 km southwest of intersection of Half Moon Road and Flo Road	Sandy Pine Savanna (Typic subtype) sensu Schafale 2012	frequent	9 m. msl	34deg.35'15.7" N	77deg.40'16.0" W	500	Robert Thornhill	933	19	8	2011
NCSC	Juncus pelocarpus E. Mey.	Juncaceae	Monocots	sensu Weakley 2012	U.S.A.	NC	Pender	in borrow pit at northern edge of savanna at southeast corner of Alligator Lake Road and Flo Road	borrow pit in Very Wet Loamy Pine Savanna (sensu Schafale 2012)	infrequent	8 m. msl	34deg.34'54.2" N	77deg.38'38.5" W	50	Robert Thornhill	1125	25	9	2011		y
NCSC	Juncus pelocarpus E. Mey.	Juncaceae	Monocots	sensu Weakley 2012	U.S.A.	NC	Pender	in borrow pit at northern edge of savanna at southeast corner of Alligator Lake Road and Flo Road	borrow pit in Very Wet Loamy Pine Savanna (sensu Schafale 2012)	infrequent	8 m. msl	34deg.34'54.2" N	77deg.38'38.5" W	50	Robert Thornhill	1125	25	9	2011		y
NCSC	Juncus pelocarpus E. Mey.	Juncaceae	Monocots	sensu Weakley 2012	U.S.A.	NC	Pender	in savanna on east side of Alligator Lake Road, immediately south of junction with Flo Road	Very Wet Loamy Pine Savanna (sensu Schafale 2012)	infrequent	8 m. msl	34deg.34'54.2" N	77deg.38'38.5" W	50	Robert Thornhill	854	12	8	2011		y
NCSC	Juncus pelocarpus E. Mey.	Juncaceae	Monocots	sensu Weakley 2012	U.S.A.	NC	Pender	in savanna on east side of Alligator Lake Road, immediately south of junction with Flo Road	Very Wet Loamy Pine Savanna (sensu Schafale 2012)	infrequent	8 m. msl	34deg.34'54.2" N	77deg.38'38.5" W	50	Robert Thornhill	1191	23	10	2011
NCSC	Juncus polycephalos Michx.	Juncaceae	Monocots	sensu Weakley 2012	U.S.A.	NC	Pender	in savanna on east side of Alligator Lake Road, immediately south of junction with Flo Road	Very Wet Loamy Pine Savanna (sensu Schafale 2012)		8 m. msl	34deg.34'54.2" N	77deg.38'38.5" W	50	Robert Thornhill	247	15	5	2011		y
NCSC	Juncus polycephalos Michx.	Juncaceae	Monocots	sensu Weakley 2012	U.S.A.	NC	Pender	in large savanna immediately south of intersection of Flo Road and Fill Road	Wet Loamy Pine Savanna (sensu Schafale 2012)	abundant	8 m. msl	34deg.34'54.7" N	77deg.39'9.0" W	100	Robert Thornhill	344	30	5	2011		y
NCSC	Juncus polycephalos Michx.	Juncaceae	Monocots	sensu Weakley 2012	U.S.A.	NC	Pender	in large savanna immediately south of intersection of Flo Road and Fill Road	Wet Loamy Pine Savanna (sensu Schafale 2012)		8 m. msl	34deg.34'54.7" N	77deg.39'9.0" W	100	Robert Thornhill	780	3	8	2011
NCSC	Juncus repens Michx.	Juncaceae	Monocots	sensu Weakley 2012	U.S.A.	NC	Pender	in borrow pit along roadside edge of savanna on Flo Road, approximately .8 km southeast of junction with Half Moon Road	borrow pit in pine savanna (Sandy Pine Savanna (Rush Featherling subtype) sensu Schafale 2012)	frequent	9 m. msl	34deg.35'8.2" N	77deg.39'42.4" W	50	Robert Thornhill	410	31	5	2011		y
NCSC	Juncus repens Michx.	Juncaceae	Monocots	sensu Weakley 2012	U.S.A.	NC	Pender	in borrow pit in Spodosol savanna/flatwood matrix on west side of Half Moon Road, approximately 1 km southwest of intersection of Half Moon Road and Flo Road	borrow pit in pine savanna (Sandy Pine Savanna (Typic subtype) sensu Schafale 2012	occasional	9 m. msl	34deg.35'15.7" N	77deg.40'16.0" W	1000	Robert Thornhill	713	21	7	2011
NCSC	Juncus scirpoides Lam. var. compositus R.M. Harper	Juncaceae	Monocots	sensu Weakley 2012	U.S.A.	NC	Pender	in Spodosol savanna on east side of Half Moon Road, 0.5-1.5 km southwest of intersection of Half Moon Road and Flo Road	Sandy Pine Savanna (Typic subtype) sensu Schafale 2012	infrequent	9 m. msl	34deg.35'15.7" N	77deg.40'16.0" W	500	Robert Thornhill	934	19	8	2011
NCSC	Juncus scirpoides Lam. var. scirpoides	Juncaceae	Monocots	sensu Weakley 2012	U.S.A.	NC	Pender	in large savanna immediately south of intersection of Flo Road and Fill Road	Wet Loamy Pine Savanna (sensu Schafale 2012)	occasional	8 m. msl	34deg.34'54.7" N	77deg.39'9.0" W	100	Robert Thornhill	968	26	8	2011
NCSC	Juncus trigonocarpus Steud.	Juncaceae	Monocots	sensu Weakley 2012	U.S.A.	NC	Pender	in borrow pit near savanna immediately south of intersection of Flo Road and Fill Road	borrow pit in pine savanna (Wet Loamy Pine Savanna sensu Schafale 2012)		8 m. msl	34deg.34'54.7" N	77deg.39'9.0" W	100	Robert Thornhill	781	3	8	2011
NCSC	Juncus validus Coville var. validus	Juncaceae	Monocots	sensu Weakley 2012	U.S.A.	NC	Pender	in savanna on east side of Alligator Lake Road, immediately south of junction with Flo Road	Very Wet Loamy Pine Savanna (sensu Schafale 2012)	frequent roadside, savanna edge	8 m. msl	34deg.34'54.2" N	77deg.38'38.5" W	50	Robert Thornhill	856	12	8	2011
NCSC	Juncus validus Coville var. validus	Juncaceae	Monocots	sensu Weakley 2012	U.S.A.	NC	Pender	in large savanna immediately south of intersection of Flo Road and Fill Road	Wet Loamy Pine Savanna (sensu Schafale 2012)		8 m. msl	34deg.34'54.7" N	77deg.39'9.0" W	100	Robert Thornhill	465	9	6	2011
NCSC	Juncus validus Coville var. validus	Juncaceae	Monocots	sensu Weakley 2012	U.S.A.	NC	Pender	in large savanna immediately south of intersection of Flo Road and Fill Road	Wet Loamy Pine Savanna (sensu Schafale 2012)		8 m. msl	34deg.34'54.7" N	77deg.39'9.0" W	100	Robert Thornhill	465	9	6	2011
NCSC	Lilium catesbaei Walter	Liliaceae	Monocots	sensu Weakley 2012	U.S.A.	NC	Pender	in savanna on east side of Alligator Lake Road, immediately south of junction with Flo Road	Very Wet Loamy Pine Savanna (sensu Schafale 2012)	infrequent	8 m. msl	34deg.34'54.2" N	77deg.38'38.5" W	50	Robert Thornhill	673	21	7	2011
NCSC	Lilium catesbaei Walter	Liliaceae	Monocots	sensu Weakley 2012	U.S.A.	NC	Pender	in savanna immediately south of Flo Road, approximately 0.3km east of intersection of Flo Road and Fill Road	Wet Loamy Pine Savanna (sensu Schafale 2012)	infrequent	8 m. msl	34deg.34'56.3" N	77deg.38'48.6" W	50	Robert Thornhill	664	21	7	2011		y
NCSC	Amianthium muscitoxicum (Walter) A. Gray	Melanthiaceae	Monocots	sensu Weakley 2012	U.S.A.	NC	Pender	in powerline right-of-way, approximately .25 km north of Shaken Creek	boggy savanna in powerline right-of-way	rare	6 m. msl	34deg.34'51.4" N	77deg.41'25.7" W	20	Robert Thornhill	1400	15	6	2012		y	in powerline cut, approximately .3 mi north of Shaken Creek
NCSC	Stenanthium densum (Desr.) Zomlefer & Judd	Melanthiaceae	Monocots	sensu Weakley 2012	U.S.A.	NC	Pender	in pine savannas along Flo Road, approximately 0.4-1.2 km southeast of junction with Half Moon Road	Sandy Pine Savanna (Rush Featherling subtype) sensu Schafale 2012	abundant	9 m. msl	34deg.35'11.9" N	77deg.39'45.9" W	400	Robert Thornhill	492	10	6	2011
NCSC	Stenanthium densum (Desr.) Zomlefer & Judd	Melanthiaceae	Monocots	sensu Weakley 2012	U.S.A.	NC	Pender	in savanna .18 km south of Flo Road at a point approximately 0.3km east of intersection of Flo Road and Fill Road	Very Wet Loamy Pine Savanna (sensu Schafale 2012)	infrequent	8 m. msl	34deg.34'50.5" N	77deg.38'46.6" W	50	Robert Thornhill	275	15	5	2011		y
NCSC	Stenanthium densum (Desr.) Zomlefer & Judd	Melanthiaceae	Monocots	sensu Weakley 2012	U.S.A.	NC	Pender	in Spodosol savanna on east side of Half Moon Road, 0.5-1.5 km southwest of intersection of Half Moon Road and Flo Road	Sandy Pine Savanna (Typic subtype) sensu Schafale 2012	frequent	9 m. msl	34deg.35'15.7" N	77deg.40'16.0" W	500	Robert Thornhill	487	10	6	2011
NCSC	Stenanthium densum (Desr.) Zomlefer & Judd	Melanthiaceae	Monocots	sensu Weakley 2012	U.S.A.	NC	Pender	in large savanna immediately south of intersection of Flo Road and Fill Road	Wet Loamy Pine Savanna (sensu Schafale 2012)	occasional	8 m. msl	34deg.34'54.7" N	77deg.39'9.0" W	100	Robert Thornhill	354	30	5	2011
NCSC	Stenanthium densum (Desr.) Zomlefer & Judd	Melanthiaceae	Monocots	sensu Weakley 2012	U.S.A.	NC	Pender	in large savanna immediately south of intersection of Flo Road and Fill Road	Wet Loamy Pine Savanna (sensu Schafale 2012)	occasional	8 m. msl	34deg.34'54.7" N	77deg.39'9.0" W	100	Robert Thornhill	354	30	5	2011
NCSC	Veratrum virginicum (L.) W.T. Aiton	Melanthiaceae	Monocots	sensu Weakley 2012	U.S.A.	NC	Pender	in savanna on east side of Alligator Lake Road, immediately south of junction with Flo Road	Very Wet Loamy Pine Savanna (sensu Schafale 2012)	infrequent	8 m. msl	34deg.34'54.2" N	77deg.38'38.5" W	50	Robert Thornhill	1010	2	9	2011		y
NCSC	Veratrum virginicum (L.) W.T. Aiton	Melanthiaceae	Monocots	sensu Weakley 2012	U.S.A.	NC	Pender	in savanna on east side of Alligator Lake Road, immediately south of junction with Flo Road	Very Wet Loamy Pine Savanna (sensu Schafale 2012)	infrequent	8 m. msl	34deg.34'54.2" N	77deg.38'38.5" W	50	Robert Thornhill	1010	2	9	2011		y
NCSC	Zigadenus glaberrimus Michx.	Melanthiaceae	Monocots	sensu Weakley 2012	U.S.A.	NC	Pender	in pine savannas along Flo Road, approximately 0.4-1.2 km southeast of junction with Half Moon Road	Sandy Pine Savanna (Rush Featherling subtype) sensu Schafale 2012	occasional	9 m. msl	34deg.35'11.9" N	77deg.39'45.9" W	400	Robert Thornhill	797	4	8	2011
NCSC	Zigadenus glaberrimus Michx.	Melanthiaceae	Monocots	sensu Weakley 2012	U.S.A.	NC	Pender	in Spodosol savanna on east side of Half Moon Road, 0.5-1.5 km southwest of intersection of Half Moon Road and Flo Road	Sandy Pine Savanna (Typic subtype) sensu Schafale 2012	occasional	9 m. msl	34deg.35'15.7" N	77deg.40'16.0" W	500	Robert Thornhill	714	21	7	2011
NCSC	Zigadenus glaberrimus Michx.	Melanthiaceae	Monocots	sensu Weakley 2012	U.S.A.	NC	Pender	in Spodosol savanna on east side of Half Moon Road, 0.5-1.5 km southwest of intersection of Half Moon Road and Flo Road	Sandy Pine Savanna (Typic subtype) sensu Schafale 2012	occasional	9 m. msl	34deg.35'15.7" N	77deg.40'16.0" W	500	Robert Thornhill	915	19	8	2011
NCSC	Zigadenus glaberrimus Michx.	Melanthiaceae	Monocots	sensu Weakley 2012	U.S.A.	NC	Pender	in savanna immediately south of Flo Road, approximately 0.3km east of intersection of Flo Road and Fill Road	Wet Loamy Pine Savanna (sensu Schafale 2012)	frequent	8 m. msl	34deg.34'56.3" N	77deg.38'48.6" W	50	Robert Thornhill	678	21	7	2011		y
NCSC	Aletris aurea Walter	Nartheciaceae	Monocots	sensu Weakley 2012	U.S.A.	NC	Pender	in savanna .18 km south of Flo Road at a point approximately 0.3km east of intersection of Flo Road and Fill Road	Very Wet Loamy Pine Savanna (sensu Schafale 2012)	occasional	8 m. msl	34deg.34'50.5" N	77deg.38'46.6" W	50	Robert Thornhill	426	9	6	2011		y
NCSC	Aletris aurea Walter	Nartheciaceae	Monocots	sensu Weakley 2012	U.S.A.	NC	Pender	in Spodosol savanna on east side of Half Moon Road, 0.5-1.5 km southwest of intersection of Half Moon Road and Flo Road	Sandy Pine Savanna (Typic subtype) sensu Schafale 2012	occasional	9 m. msl	34deg.35'15.7" N	77deg.40'16.0" W	500	Robert Thornhill	535	21	6	2011		y
NCSC	Aletris aurea Walter	Nartheciaceae	Monocots	sensu Weakley 2012	U.S.A.	NC	Pender	in Spodosol savanna on east side of Half Moon Road, 0.5-1.5 km southwest of intersection of Half Moon Road and Flo Road	Sandy Pine Savanna (Typic subtype) sensu Schafale 2012	occasional	9 m. msl	34deg.35'15.7" N	77deg.40'16.0" W	500	Robert Thornhill	536	21	6	2011
NCSC	Aletris farinosa L.	Nartheciaceae	Monocots	sensu Weakley 2012	U.S.A.	NC	Pender	in pine savannas along Flo Road, approximately 0.4-1.2 km southeast of junction with Half Moon Road	Sandy Pine Savanna (Rush Featherling subtype) sensu Schafale 2012	occasional	9 m. msl	34deg.35'11.9" N	77deg.39'45.9" W	400	Robert Thornhill	382	31	5	2011
NCSC	Aletris farinosa L.	Nartheciaceae	Monocots	sensu Weakley 2012	U.S.A.	NC	Pender	in savanna .18 km south of Flo Road at a point approximately 0.3km east of intersection of Flo Road and Fill Road	Very Wet Loamy Pine Savanna (sensu Schafale 2012)		8 m. msl	34deg.34'50.5" N	77deg.38'46.6" W	50	Robert Thornhill	274	15	5	2011
NCSC	Aletris farinosa L.	Nartheciaceae	Monocots	sensu Weakley 2012	U.S.A.	NC	Pender	in savanna on east side of Alligator Lake Road, immediately south of junction with Flo Road	Very Wet Loamy Pine Savanna (sensu Schafale 2012)		8 m. msl	34deg.34'54.2" N	77deg.38'38.5" W	50	Robert Thornhill	248	15	5	2011		y
NCSC	Aletris farinosa L.	Nartheciaceae	Monocots	sensu Weakley 2012	U.S.A.	NC	Pender	in savanna on east side of Alligator Lake Road, immediately south of junction with Flo Road	Very Wet Loamy Pine Savanna (sensu Schafale 2012)		8 m. msl	34deg.34'54.2" N	77deg.38'38.5" W	50	Robert Thornhill	248	15	5	2011		y
NCSC	Aletris farinosa L.	Nartheciaceae	Monocots	sensu Weakley 2012	U.S.A.	NC	Pender	in Spodosol savanna on east side of Half Moon Road, 0.5-1.5 km southwest of intersection of Half Moon Road and Flo Road	Sandy Pine Savanna (Typic subtype) sensu Schafale 2012	frequent	9 m. msl	34deg.35'15.7" N	77deg.40'16.0" W	500	Robert Thornhill	385	31	5	2011
NCSC	Aletris farinosa L.	Nartheciaceae	Monocots	sensu Weakley 2012	U.S.A.	NC	Pender	in large savanna immediately south of intersection of Flo Road and Fill Road	Wet Loamy Pine Savanna (sensu Schafale 2012)		8 m. msl	34deg.34'54.7" N	77deg.39'9.0" W	100	Robert Thornhill	291	15	5	2011
NCSC	Aletris farinosa L.	Nartheciaceae	Monocots	sensu Weakley 2012	U.S.A.	NC	Pender	in savanna immediately south of Flo Road, approximately 0.3km east of intersection of Flo Road and Fill Road	Wet Loamy Pine Savanna (sensu Schafale 2012)	occasional	8 m. msl	34deg.34'56.3" N	77deg.38'48.6" W	50	Robert Thornhill	324	30	5	2011
NCSC	Aletris lutea Small	Nartheciaceae	Monocots	sensu Weakley 2012	U.S.A.	NC	Pender	in savanna on east side of Alligator Lake Road, immediately south of junction with Flo Road	Very Wet Loamy Pine Savanna (sensu Schafale 2012)	rare	8 m. msl	34deg.34'54.2" N	77deg.38'38.5" W	50	Robert Thornhill	556	28	6	2011		y
NCSC	Calopogon barbatus (Walter) Ames	Orchidaceae	Monocots	sensu Weakley 2012	U.S.A.	NC	Pender	in savanna .18 km south of Flo Road at a point approximately 0.3km east of intersection of Flo Road and Fill Road	Very Wet Loamy Pine Savanna (sensu Schafale 2012)		8 m. msl	34deg.34'50.5" N	77deg.38'46.6" W	50	Robert Thornhill	188	1	5	2011
NCSC	Calopogon barbatus (Walter) Ames	Orchidaceae	Monocots	sensu Weakley 2012	U.S.A.	NC	Pender	in savanna .18 km south of Flo Road at a point approximately 0.3km east of intersection of Flo Road and Fill Road	Very Wet Loamy Pine Savanna (sensu Schafale 2012)		8 m. msl	34deg.34'50.5" N	77deg.38'46.6" W	50	Robert Thornhill	189	1	5	2011
NCSC	Calopogon barbatus (Walter) Ames	Orchidaceae	Monocots	sensu Weakley 2012	U.S.A.	NC	Pender	in Spodosol savanna on east side of Half Moon Road, 0.5-1.5 km southwest of intersection of Half Moon Road and Flo Road	Sandy Pine Savanna (Typic subtype) sensu Schafale 2012		9 m. msl	34deg.35'15.7" N	77deg.40'16.0" W	500	Robert Thornhill	162	22	4	2011
NCSC	Calopogon barbatus (Walter) Ames	Orchidaceae	Monocots	sensu Weakley 2012	U.S.A.	NC	Pender	in large savanna immediately south of intersection of Flo Road and Fill Road	Wet Loamy Pine Savanna (sensu Schafale 2012)		8 m. msl	34deg.34'54.7" N	77deg.39'9.0" W	100	Robert Thornhill	206	1	5	2011
NCSC	Calopogon barbatus (Walter) Ames	Orchidaceae	Monocots	sensu Weakley 2012	U.S.A.	NC	Pender	in savanna immediately south of Flo Road, approximately 0.3km east of intersection of Flo Road and Fill Road	Wet Loamy Pine Savanna (sensu Schafale 2012)		8 m. msl	34deg.34'56.3" N	77deg.38'48.6" W	50	Robert Thornhill	193	1	5	2011
NCSC	Calopogon pallidus Chapm.	Orchidaceae	Monocots	sensu Weakley 2012	U.S.A.	NC	Pender	in savanna immediately south of Flo Road, approximately 0.3km east of intersection of Flo Road and Fill Road	Wet Loamy Pine Savanna (sensu Schafale 2012)		8 m. msl	34deg.34'56.3" N	77deg.38'48.6" W	50	Robert Thornhill	323	30	5	2011
NCSC	Calopogon pallidus Chapm.	Orchidaceae	Monocots	sensu Weakley 2012	U.S.A.	NC	Pender	in pine savannas along Flo Road, approximately 0.4-1.2 km southeast of junction with Half Moon Road	Sandy Pine Savanna (Rush Featherling subtype) sensu Schafale 2012	occasional	9 m. msl	34deg.35'11.9" N	77deg.39'45.9" W	400	Robert Thornhill	408	31	5	2011
NCSC	Calopogon pallidus Chapm.	Orchidaceae	Monocots	sensu Weakley 2012	U.S.A.	NC	Pender	in Spodosol savanna on east side of Half Moon Road, 0.5-1.5 km southwest of intersection of Half Moon Road and Flo Road	Sandy Pine Savanna (Typic subtype) sensu Schafale 2012	occasional	9 m. msl	34deg.35'15.7" N	77deg.40'16.0" W	500	Robert Thornhill	399	31	5	2011
NCSC	Calopogon pallidus Chapm.	Orchidaceae	Monocots	sensu Weakley 2012	U.S.A.	NC	Pender	in savanna immediately south of Flo Road, approximately 0.3km east of intersection of Flo Road and Fill Road	Wet Loamy Pine Savanna (sensu Schafale 2012)	frequent	8 m. msl	34deg.34'56.3" N	77deg.38'48.6" W	50	Robert Thornhill	322	30	5	2011
NCSC	Calopogon tuberosus (L.) Britton, Sterns & Poggenb. var. tuberosus	Orchidaceae	Monocots	sensu Weakley 2012	U.S.A.	NC	Pender	in pine savannas along Flo Road, approximately 0.4-1.2 km southeast of junction with Half Moon Road	Sandy Pine Savanna (Rush Featherling subtype) sensu Schafale 2012	infrequent	9 m. msl	34deg.35'11.9" N	77deg.39'45.9" W	400	Robert Thornhill	379	31	5	2011
NCSC	Calopogon tuberosus (L.) Britton, Sterns & Poggenb. var. tuberosus	Orchidaceae	Monocots	sensu Weakley 2012	U.S.A.	NC	Pender	in savanna immediately south of Flo Road, approximately 0.3km east of intersection of Flo Road and Fill Road	Wet Loamy Pine Savanna (sensu Schafale 2012)	occasional	8 m. msl	34deg.34'56.3" N	77deg.38'48.6" W	50	Robert Thornhill	421	9	6	2011
NCSC	Cleistesiopsis divaricata (L.) Pansarin & F. Barros	Orchidaceae	Monocots	sensu Weakley 2012	U.S.A.	NC	Pender	in powerline cut approximately 50 meters north of Indian Grave Road	disturbed pine savanna	approximately 10 scattered flowering individuals	9 m. msl	34deg.35'9.3" N	77deg.41'1.5" W	50	Robert Thornhill	386	31	5	2011			in powerline cut, just north of Indian Grave Road
NCSC	Platanthera blephariglottis (Willd.) Lindl.	Orchidaceae	Monocots	sensu Weakley 2012	U.S.A.	NC	Pender	in ditch along east side of William Road, approximately .4 km north of hunting lodge	roadside ditch	rare	9 m. msl	34deg.34'51.6" N	77deg.39'56.7" W	20	Robert Thornhill	1521	14	8	2012			in ditch near hunting lodge on Williams Road
NCSC	Platanthera cristata (Michx.) Lindl.	Orchidaceae	Monocots	sensu Weakley 2012	U.S.A.	NC	Pender	in pine savannas along Flo Road, approximately 0.4-1.2 km southeast of junction with Half Moon Road	Sandy Pine Savanna (Rush Featherling subtype) sensu Schafale 2012	infrequent	9 m. msl	34deg.35'11.9" N	77deg.39'45.9" W	400	Robert Thornhill	1448	26	7	2012
NCSC	Pogonia ophioglossoides (L.) Ker Gawl.	Orchidaceae	Monocots	sensu Weakley 2012	U.S.A.	NC	Pender	in pine savanna on northeast corner of intersection of Flo Road and Fill Road	Very Wet Loamy Pine Savanna (sensu Schafale 2012)	infrequent	8 m. msl	34deg.35'0.1" N	77deg.38'59.2" W	50	Robert Thornhill	1286	2	5	2012
NCSC	Spiranthes cernua (L.) Rich.	Orchidaceae	Monocots	sensu Weakley 2012	U.S.A.	NC	Pender	near borrow pit ca. 0.1 km south of hunting lodge, just east of Williams Road	disturbed mesic pine savanna	infrequent	8 m. msl	34deg.35'0.8" N	77deg.40'2.0" W	20	Robert Thornhill	489	10	6	2011
NCSC	Spiranthes cernua (L.) Rich.	Orchidaceae	Monocots	sensu Weakley 2012	U.S.A.	NC	Pender	in savanna on east side of Alligator Lake Road, immediately south of junction with Flo Road	Very Wet Loamy Pine Savanna (sensu Schafale 2012)	occasional	8 m. msl	34deg.34'54.2" N	77deg.38'38.5" W	50	Robert Thornhill	1555	30	10	2012			along savanna margin at Alligator Lake Road, approximately 200 feet south of junction with Flo Road
NCSC	Spiranthes cernua (L.) Rich.	Orchidaceae	Monocots	sensu Weakley 2012	U.S.A.	NC	Pender	in savanna on east side of Alligator Lake Road, immediately south of junction with Flo Road	Very Wet Loamy Pine Savanna (sensu Schafale 2012)	rare	8 m. msl	34deg.34'54.2" N	77deg.38'38.5" W	50	Robert Thornhill	1173	23	10	2011
NCSC	Spiranthes cernua (L.) Rich.	Orchidaceae	Monocots	sensu Weakley 2012	U.S.A.	NC	Pender	in flatwoods circa 0.1 km east of Williams Road from a point approximately .3 km north of junction with Mule Pen Road	Wet Pine Flatwoods (Typic subtype ) sensu Schafale 2012	rare	7 m. msl	34deg.35'7.1" N	77deg.41'15.1" W	50	Robert Thornhill	1356	11	6	2012			east of Williams Road, approximately .2 mi north of Mule Pen Road
NCSC	Spiranthes eatonii Ames ex P.M. Br.	Orchidaceae	Monocots	sensu Weakley 2012	U.S.A.	NC	Pender		Very Wet Loamy Pine Savanna (sensu Schafale 2012)	infrequent				50	Robert Thornhill	483	10	6	2011
NCSC	Spiranthes eatonii Ames ex P.M. Br.	Orchidaceae	Monocots	sensu Weakley 2012	U.S.A.	NC	Pender		Very Wet Loamy Pine Savanna (sensu Schafale 2012)	rare				50	Robert Thornhill	1303	3	6	2012
NCSC	Spiranthes eatonii Ames ex P.M. Br.	Orchidaceae	Monocots	sensu Weakley 2012	U.S.A.	NC	Pender		disturbed mesic pine savanna	infrequent				20	Robert Thornhill	1377	11	6	2012
NCSC	Spiranthes laciniata (Small) Ames	Orchidaceae	Monocots	sensu Weakley 2012	U.S.A.	NC	Pender		disturbed pine savanna					50	Robert Thornhill	390	31	5	2011
NCSC	Spiranthes laciniata (Small) Ames	Orchidaceae	Monocots	sensu Weakley 2012	U.S.A.	NC	Pender		Wet Loamy Pine Savanna (sensu Schafale 2012)					100	Robert Thornhill	477	9	6	2011
NCSC	Spiranthes praecox (Walter) S. Watson	Orchidaceae	Monocots	sensu Weakley 2012	U.S.A.	NC	Pender	in savanna on east side of Alligator Lake Road, immediately south of junction with Flo Road	Very Wet Loamy Pine Savanna (sensu Schafale 2012)	rare	8 m. msl	34deg.34'54.2" N	77deg.38'38.5" W	50	Robert Thornhill	1301	22	5	2012
NCSC	Spiranthes vernalis Englem. & A. Gray	Orchidaceae	Monocots	sensu Weakley 2012	U.S.A.	NC	Pender	Along south side of Flo Road along savanna margin, approximately .15 mi west of junction with Alligator Lake Road.	Wet Loamy Pine Savanna (sensu Schafale 2012)	infrequent	8 m. msl	34deg34' 58.1"N	77deg.38'46.7"W	100	Robert Thornhill	1556	9	6	2013
NCSC	Agrostis altissima (Walter) Tuck.	Poaceae	Monocots	sensu Weakley 2012	U.S.A.	NC	Pender		Very Wet Loamy Pine Savanna (sensu Schafale 2012)	occasional					Robert Thornhill	1132	7	10	2011
NCSC	Agrostis altissima (Walter) Tuck.	Poaceae	Monocots	sensu Weakley 2012	U.S.A.	NC	Pender		Very Wet Loamy Pine Savanna (sensu Schafale 2012)	occasional					Robert Thornhill	1164	7	10	2011
NCSC	Agrostis altissima (Walter) Tuck.	Poaceae	Monocots	sensu Weakley 2012	U.S.A.	NC	Pender		Very Wet Loamy Pine Savanna (sensu Schafale 2012)	occasional					Robert Thornhill	1076	16	9	2011
NCSC	Agrostis altissima (Walter) Tuck.	Poaceae	Monocots	sensu Weakley 2012	U.S.A.	NC	Pender		Very Wet Loamy Pine Savanna (sensu Schafale 2012)	occasional					Robert Thornhill	1192	23	10	2011
NCSC	Agrostis altissima (Walter) Tuck.	Poaceae	Monocots	sensu Weakley 2012	U.S.A.	NC	Pender		Wet Loamy Pine Savanna (sensu Schafale 2012)	occasional					Robert Thornhill	1060	9	9	2011
NCSC	Agrostis altissima (Walter) Tuck.	Poaceae	Monocots	sensu Weakley 2012	U.S.A.	NC	Pender		Wet Loamy Pine Savanna (sensu Schafale 2012)	occasional					Robert Thornhill	1060	9	9	2011
NCSC	Agrostis hyemalis (Walter) Britton, Sterns, & Poggenb.	Poaceae	Monocots	sensu Weakley 2012	U.S.A.	NC	Pender	in pine savannas along Flo Road, approximately 0.4-1.2 km southeast of junction with Half Moon Road	Sandy Pine Savanna (Rush Featherling subtype) sensu Schafale 2012	flowers atypically small	9 m. msl	34deg.35'11.9" N	77deg.39'45.9" W	400	Robert Thornhill	413	31	5	2011
NCSC	Agrostis hyemalis (Walter) Britton, Sterns, & Poggenb.	Poaceae	Monocots	sensu Weakley 2012	U.S.A.	NC	Pender	in pine savannas along Flo Road, approximately 0.4-1.2 km southeast of junction with Half Moon Road	Sandy Pine Savanna (Rush Featherling subtype) sensu Schafale 2012	flowers atypically small	9 m. msl	34deg.35'11.9" N	77deg.39'45.9" W	400	Robert Thornhill	299	15	5	2011
NCSC	Agrostis hyemalis (Walter) Britton, Sterns, & Poggenb.	Poaceae	Monocots	sensu Weakley 2012	U.S.A.	NC	Pender	along Flo Road, 0.4-1.2 km southeast of junction with Half Moon Road	sandy roadside margin, adjacent to pine savanna	occasional	9 m. msl	34deg.35'11.9" N	77deg.39'45.9" W	400	Robert Thornhill	406	31	5	2011
NCSC	Agrostis hyemalis (Walter) Britton, Sterns, & Poggenb.	Poaceae	Monocots	sensu Weakley 2012	U.S.A.	NC	Pender	along Flo Road, 0.4-1.2 km southeast of junction with Half Moon Road	sandy roadside margin, adjacent to pine savanna	occasional	9 m. msl	34deg.35'11.9" N	77deg.39'45.9" W	400	Robert Thornhill	406	31	5	2011
NCSC	Agrostis hyemalis (Walter) Britton, Sterns, & Poggenb.	Poaceae	Monocots	sensu Weakley 2012	U.S.A.	NC	Pender	along Flo Road, near intersection with Fill Road	sandy roadside margin, adjacent to pine savanna	occasional	8 m. msl	34deg.34'56.4" N	77deg.39'8.8" W	200	Robert Thornhill	332	30	5	2011
NCSC	Agrostis hyemalis (Walter) Britton, Sterns, & Poggenb.	Poaceae	Monocots	sensu Weakley 2012	U.S.A.	NC	Pender	in Spodosol savanna on east side of Half Moon Road, 0.5-1.5 km southwest of intersection of Half Moon Road and Flo Road	Sandy Pine Savanna (Typic subtype) sensu Schafale 2012		9 m. msl	34deg.35'15.7" N	77deg.40'16.0" W	500	Robert Thornhill	226	6	5	2011
NCSC	Agrostis hyemalis (Walter) Britton, Sterns, & Poggenb.	Poaceae	Monocots	sensu Weakley 2012	U.S.A.	NC	Pender	in Spodosol savanna on east side of Half Moon Road, 0.5-1.5 km southwest of intersection of Half Moon Road and Flo Road	Sandy Pine Savanna (Typic subtype) sensu Schafale 2012		9 m. msl	34deg.35'15.7" N	77deg.40'16.0" W	500	Robert Thornhill	226	6	5	2011
NCSC	Agrostis hyemalis (Walter) Britton, Sterns, & Poggenb.	Poaceae	Monocots	sensu Weakley 2012	U.S.A.	NC	Pender	in large savanna immediately south of intersection of Flo Road and Fill Road	Wet Loamy Pine Savanna (sensu Schafale 2012)		8 m. msl	34deg.34'54.7" N	77deg.39'9.0" W	100	Robert Thornhill	287	15	5	2011
NCSC	Agrostis perennans (Walter) Tuck.	Poaceae	Monocots	sensu Weakley 2012	U.S.A.	NC	Pender	in large savanna immediately south of intersection of Flo Road and Fill Road	Wet Loamy Pine Savanna (sensu Schafale 2012)		8 m. msl	34deg.34'54.7" N	77deg.39'9.0" W	100	Robert Thornhill	1021	2	9	2011
NCSC	Amphicarpum amphicarpon (Pursh) Nash	Poaceae	Monocots	sensu Weakley 2012	U.S.A.	NC	Pender	in pine savannas along Flo Road, approximately 0.4-1.2 km southeast of junction with Half Moon Road	Sandy Pine Savanna (Rush Featherling subtype) sensu Schafale 2012	occasional	9 m. msl	34deg.35'11.9" N	77deg.39'45.9" W	400	Robert Thornhill	821	4	8	2011		y
NCSC	Amphicarpum amphicarpon (Pursh) Nash	Poaceae	Monocots	sensu Weakley 2012	U.S.A.	NC	Pender	in Spodosol savanna on east side of Half Moon Road, 0.5-1.5 km southwest of intersection of Half Moon Road and Flo Road	Sandy Pine Savanna (Typic subtype) sensu Schafale 2012		9 m. msl	34deg.35'15.7" N	77deg.40'16.0" W	500	Robert Thornhill	23	21	8	2010
NCSC	Amphicarpum amphicarpon (Pursh) Nash	Poaceae	Monocots	sensu Weakley 2012	U.S.A.	NC	Pender	in Spodosol savanna on east side of Half Moon Road, 0.5-1.5 km southwest of intersection of Half Moon Road and Flo Road	Sandy Pine Savanna (Typic subtype) sensu Schafale 2012		9 m. msl	34deg.35'15.7" N	77deg.40'16.0" W	500	Robert Thornhill	23	21	8	2010
NCSC	Andropogon dealbatus (C. Mohr ex Hack.) Weakley & LeBlond	Poaceae	Monocots	sensu Weakley 2012	U.S.A.	NC	Pender	in savanna on east side of Alligator Lake Road, immediately south of junction with Flo Road	Very Wet Loamy Pine Savanna (sensu Schafale 2012)		8 m. msl	34deg.34'54.2" N	77deg.38'38.5" W	50	Robert Thornhill	1196	23	10	2011
NCSC	Andropogon dealbatus (C. Mohr ex Hack.) Weakley & LeBlond	Poaceae	Monocots	sensu Weakley 2012	U.S.A.	NC	Pender	in savanna on east side of Alligator Lake Road, immediately south of junction with Flo Road	Very Wet Loamy Pine Savanna (sensu Schafale 2012)		8 m. msl	34deg.34'54.2" N	77deg.38'38.5" W	50	Robert Thornhill	1196	23	10	2011
NCSC	Andropogon dealbatus (C. Mohr ex Hack.) Weakley & LeBlond	Poaceae	Monocots	sensu Weakley 2012	U.S.A.	NC	Pender	in savanna on east side of Alligator Lake Road, immediately south of junction with Flo Road	Very Wet Loamy Pine Savanna (sensu Schafale 2012)		8 m. msl	34deg.34'54.2" N	77deg.38'38.5" W	50	Robert Thornhill	1113	16	9	2011
NCSC	Andropogon dealbatus (C. Mohr ex Hack.) Weakley & LeBlond	Poaceae	Monocots	sensu Weakley 2012	U.S.A.	NC	Pender	in Spodosol savanna on east side of Half Moon Road, 0.5-1.5 km southwest of intersection of Half Moon Road and Flo Road	Sandy Pine Savanna (Typic subtype) sensu Schafale 2012	occasional	9 m. msl	34deg.35'15.7" N	77deg.40'16.0" W	500	Robert Thornhill	1118	25	9	2011		y
NCSC	Andropogon gerardii Vitman	Poaceae	Monocots	sensu Weakley 2012	U.S.A.	NC	Pender	in savanna on east side of Alligator Lake Road, immediately south of junction with Flo Road	Very Wet Loamy Pine Savanna (sensu Schafale 2012)	occasional	8 m. msl	34deg.34'54.2" N	77deg.38'38.5" W	50	Robert Thornhill	848	12	8	2011
NCSC	Andropogon gerardii Vitman	Poaceae	Monocots	sensu Weakley 2012	U.S.A.	NC	Pender	in savanna on east side of Alligator Lake Road, immediately south of junction with Flo Road	Very Wet Loamy Pine Savanna (sensu Schafale 2012)	occasional	8 m. msl	34deg.34'54.2" N	77deg.38'38.5" W	50	Robert Thornhill	1098	16	9	2011
NCSC	Andropogon gerardii Vitman	Poaceae	Monocots	sensu Weakley 2012	U.S.A.	NC	Pender	in large savanna immediately south of intersection of Flo Road and Fill Road	Wet Loamy Pine Savanna (sensu Schafale 2012)	frequent	8 m. msl	34deg.34'54.7" N	77deg.39'9.0" W	100	Robert Thornhill	1040	9	9	2011
NCSC	Andropogon gerardii Vitman	Poaceae	Monocots	sensu Weakley 2012	U.S.A.	NC	Pender	in large savanna immediately south of intersection of Flo Road and Fill Road	Wet Loamy Pine Savanna (sensu Schafale 2012)	frequent	8 m. msl	34deg.34'54.7" N	77deg.39'9.0" W	100	Robert Thornhill	1040	9	9	2011
NCSC	Andropogon gerardii Vitman	Poaceae	Monocots	sensu Weakley 2012	U.S.A.	NC	Pender	in savanna immediately south of Flo Road, approximately 0.3km east of intersection of Flo Road and Fill Road	Wet Loamy Pine Savanna (sensu Schafale 2012)	occasional (frequent in patches)	8 m. msl	34deg.34'56.3" N	77deg.38'48.6" W	50	Robert Thornhill	690	21	7	2011		y
NCSC	Andropogon glaucopsis Steud.	Poaceae	Monocots	sensu Weakley 2012	U.S.A.	NC	Pender	in Spodosol savanna on east side of Half Moon Road, 0.5-1.5 km southwest of intersection of Half Moon Road and Flo Road	Sandy Pine Savanna (Typic subtype) sensu Schafale 2012		9 m. msl	34deg.35'15.7" N	77deg.40'16.0" W	500	Robert Thornhill	21	21	8	2010
NCSC	Andropogon glaucopsis Steud.	Poaceae	Monocots	sensu Weakley 2012	U.S.A.	NC	Pender	in Spodosol savanna on east side of Half Moon Road, 0.5-1.5 km southwest of intersection of Half Moon Road and Flo Road	Sandy Pine Savanna (Typic subtype) sensu Schafale 2012	occasional	9 m. msl	34deg.35'15.7" N	77deg.40'16.0" W	500	Robert Thornhill	1119	25	9	2011
NCSC	Andropogon glaucopsis Steud.	Poaceae	Monocots	sensu Weakley 2012	U.S.A.	NC	Pender	in Spodosol savanna on east side of Half Moon Road, 0.5-1.5 km southwest of intersection of Half Moon Road and Flo Road	Sandy Pine Savanna (Typic subtype) sensu Schafale 2012	occasional	9 m. msl	34deg.35'15.7" N	77deg.40'16.0" W	500	Robert Thornhill	1160	7	10	2011
NCSC	Andropogon glomeratus (Walter) Britton, Sterns, & Poggenb.	Poaceae	Monocots	sensu Weakley 2012	U.S.A.	NC	Pender	in pine savanna on northeast corner of intersection of Flo Road and Fill Road	Very Wet Loamy Pine Savanna (sensu Schafale 2012)	frequent	8 m. msl	34deg.35'0.1" N	77deg.38'59.2" W	50	Robert Thornhill	1157	7	10	2011		y
NCSC	Andropogon glomeratus (Walter) Britton, Sterns, & Poggenb.	Poaceae	Monocots	sensu Weakley 2012	U.S.A.	NC	Pender	in pine savanna on northeast corner of intersection of Flo Road and Fill Road	Very Wet Loamy Pine Savanna (sensu Schafale 2012)	frequent	8 m. msl	34deg.35'0.1" N	77deg.38'59.2" W	50	Robert Thornhill	1157	7	10	2011		y
NCSC	Andropogon glomeratus (Walter) Britton, Sterns, & Poggenb.	Poaceae	Monocots	sensu Weakley 2012	U.S.A.	NC	Pender	in pine savanna on northeast corner of intersection of Flo Road and Fill Road	Very Wet Loamy Pine Savanna (sensu Schafale 2012)	frequent	8 m. msl	34deg.35'0.1" N	77deg.38'59.2" W	50	Robert Thornhill	1162	7	10	2011
NCSC	Andropogon glomeratus (Walter) Britton, Sterns, & Poggenb.	Poaceae	Monocots	sensu Weakley 2012	U.S.A.	NC	Pender	in pine savannas along Flo Road, approximately 0.4-1.2 km southeast of junction with Half Moon Road	Sandy Pine Savanna (Rush Featherling subtype) sensu Schafale 2012		9 m. msl	34deg.35'11.9" N	77deg.39'45.9" W	400	Robert Thornhill	1064	9	9	2011
NCSC	Andropogon glomeratus (Walter) Britton, Sterns, & Poggenb.	Poaceae	Monocots	sensu Weakley 2012	U.S.A.	NC	Pender	in savanna on east side of Alligator Lake Road, immediately south of junction with Flo Road	Very Wet Loamy Pine Savanna (sensu Schafale 2012)		8 m. msl	34deg.34'54.2" N	77deg.38'38.5" W	50	Robert Thornhill	1241	6	11	2011
NCSC	Andropogon glomeratus (Walter) Britton, Sterns, & Poggenb.	Poaceae	Monocots	sensu Weakley 2012	U.S.A.	NC	Pender	in Spodosol savanna on east side of Half Moon Road, 0.5-1.5 km southwest of intersection of Half Moon Road and Flo Road	Sandy Pine Savanna (Typic subtype) sensu Schafale 2012		9 m. msl	34deg.35'15.7" N	77deg.40'16.0" W	500	Robert Thornhill	1218	28	10	2011
NCSC	Andropogon glomeratus (Walter) Britton, Sterns, & Poggenb.	Poaceae	Monocots	sensu Weakley 2012	U.S.A.	NC	Pender	in Spodosol savanna on east side of Half Moon Road, 0.5-1.5 km southwest of intersection of Half Moon Road and Flo Road	Sandy Pine Savanna (Typic subtype) sensu Schafale 2012		9 m. msl	34deg.35'15.7" N	77deg.40'16.0" W	500	Robert Thornhill	1219	28	10	2011
NCSC	Andropogon glomeratus (Walter) Britton, Sterns, & Poggenb.	Poaceae	Monocots	sensu Weakley 2012	U.S.A.	NC	Pender	in savanna immediately south of Flo Road, approximately 0.3km east of intersection of Flo Road and Fill Road	Wet Loamy Pine Savanna (sensu Schafale 2012)	frequent	8 m. msl	34deg.34'56.3" N	77deg.38'48.6" W	50	Robert Thornhill	1151	7	10	2011		y
NCSC	Andropogon glomeratus (Walter) Britton, Sterns, & Poggenb.	Poaceae	Monocots	sensu Weakley 2012	U.S.A.	NC	Pender	in savanna immediately south of Flo Road, approximately 0.3km east of intersection of Flo Road and Fill Road	Wet Loamy Pine Savanna (sensu Schafale 2012)	frequent	8 m. msl	34deg.34'56.3" N	77deg.38'48.6" W	50	Robert Thornhill	1151	7	10	2011		y
NCSC	Andropogon glomeratus (Walter) Britton, Sterns, & Poggenb.	Poaceae	Monocots	sensu Weakley 2012	U.S.A.	NC	Pender	in savanna immediately south of Flo Road, approximately 0.3km east of intersection of Flo Road and Fill Road	Wet Loamy Pine Savanna (sensu Schafale 2012)	frequent	8 m. msl	34deg.34'56.3" N	77deg.38'48.6" W	50	Robert Thornhill	1243	6	11	2011
NCSC	Andropogon glomeratus (Walter) Britton, Sterns, & Poggenb.	Poaceae	Monocots	sensu Weakley 2012	U.S.A.	NC	Pender	in savanna immediately south of Flo Road, approximately 0.3km east of intersection of Flo Road and Fill Road	Wet Loamy Pine Savanna (sensu Schafale 2012)	frequent	8 m. msl	34deg.34'56.3" N	77deg.38'48.6" W	50	Robert Thornhill	1243	6	11	2011
NCSC	Andropogon glomeratus (Walter) Britton, Sterns, & Poggenb.	Poaceae	Monocots	sensu Weakley 2012	U.S.A.	NC	Pender	in savanna immediately south of Flo Road, approximately 0.3km east of intersection of Flo Road and Fill Road	Wet Loamy Pine Savanna (sensu Schafale 2012)	frequent	8 m. msl	34deg.34'56.3" N	77deg.38'48.6" W	50	Robert Thornhill	1244	6	11	2011
NCSC	Andropogon glomeratus (Walter) Britton, Sterns, & Poggenb.	Poaceae	Monocots	sensu Weakley 2012	U.S.A.	NC	Pender	in savanna immediately south of Flo Road, approximately 0.3km east of intersection of Flo Road and Fill Road	Wet Loamy Pine Savanna (sensu Schafale 2012)	frequent	8 m. msl	34deg.34'56.3" N	77deg.38'48.6" W	50	Robert Thornhill	1244	6	11	2011
NCSC	Andropogon hirsutior (Hack.) Weakley & LeBlond	Poaceae	Monocots	sensu Weakley 2012	U.S.A.	NC	Pender	in pine savannas along Flo Road, approximately 0.4-1.2 km southeast of junction with Half Moon Road	Sandy Pine Savanna (Rush Featherling subtype) sensu Schafale 2012		9 m. msl	34deg.35'11.9" N	77deg.39'45.9" W	400	Robert Thornhill	1065	9	9	2011
NCSC	Andropogon hirsutior (Hack.) Weakley & LeBlond	Poaceae	Monocots	sensu Weakley 2012	U.S.A.	NC	Pender	in savanna on east side of Alligator Lake Road, immediately south of junction with Flo Road	Very Wet Loamy Pine Savanna (sensu Schafale 2012)		8 m. msl	34deg.34'54.2" N	77deg.38'38.5" W	50	Robert Thornhill	1165	7	10	2011
NCSC	Andropogon hirsutior (Hack.) Weakley & LeBlond	Poaceae	Monocots	sensu Weakley 2012	U.S.A.	NC	Pender	in savanna on east side of Alligator Lake Road, immediately south of junction with Flo Road	Very Wet Loamy Pine Savanna (sensu Schafale 2012)		8 m. msl	34deg.34'54.2" N	77deg.38'38.5" W	50	Robert Thornhill	1200	23	10	2011
NCSC	Andropogon hirsutior (Hack.) Weakley & LeBlond	Poaceae	Monocots	sensu Weakley 2012	U.S.A.	NC	Pender	in savanna immediately south of Flo Road, approximately 0.3km east of intersection of Flo Road and Fill Road	Wet Loamy Pine Savanna (sensu Schafale 2012)		8 m. msl	34deg.34'56.3" N	77deg.38'48.6" W	50	Robert Thornhill	1154	7	10	2011
NCSC	Andropogon perangustatus Nash	Poaceae	Monocots	sensu Weakley 2012	U.S.A.	NC	Pender	in large savanna immediately south of intersection of Flo Road and Fill Road	Wet Loamy Pine Savanna (sensu Schafale 2012)		8 m. msl	34deg.34'54.7" N	77deg.39'9.0" W	100	Robert Thornhill	1051	9	9	2011
NCSC	Andropogon perangustatus Nash	Poaceae	Monocots	sensu Weakley 2012	U.S.A.	NC	Pender	in large savanna immediately south of intersection of Flo Road and Fill Road	Wet Loamy Pine Savanna (sensu Schafale 2012)		8 m. msl	34deg.34'54.7" N	77deg.39'9.0" W	100	Robert Thornhill	1051	9	9	2011
NCSC	Andropogon perangustatus Nash	Poaceae	Monocots	sensu Weakley 2012	U.S.A.	NC	Pender	in savanna immediately south of Flo Road, approximately 0.3km east of intersection of Flo Road and Fill Road	Wet Loamy Pine Savanna (sensu Schafale 2012)	occasional	8 m. msl	34deg.34'56.3" N	77deg.38'48.6" W	50	Robert Thornhill	1246	6	11	2011
NCSC	Andropogon perangustatus Nash	Poaceae	Monocots	sensu Weakley 2012	U.S.A.	NC	Pender	in savanna immediately south of Flo Road, approximately 0.3km east of intersection of Flo Road and Fill Road	Wet Loamy Pine Savanna (sensu Schafale 2012)	occasional	8 m. msl	34deg.34'56.3" N	77deg.38'48.6" W	50	Robert Thornhill	1246	6	11	2011
NCSC	Andropogon tenuispatheus (Nash) Nash	Poaceae	Monocots	sensu Weakley 2012	U.S.A.	NC	Pender	in savanna immediately south of Flo Road, approximately 0.3km east of intersection of Flo Road and Fill Road	Wet Loamy Pine Savanna (sensu Schafale 2012)		8 m. msl	34deg.34'56.3" N	77deg.38'48.6" W	50	Robert Thornhill	1193	23	10	2011
NCSC	Andropogon tenuispatheus (Nash) Nash	Poaceae	Monocots	sensu Weakley 2012	U.S.A.	NC	Pender	in savanna immediately south of Flo Road, approximately 0.3km east of intersection of Flo Road and Fill Road	Wet Loamy Pine Savanna (sensu Schafale 2012)		8 m. msl	34deg.34'56.3" N	77deg.38'48.6" W	50	Robert Thornhill	1247	6	11	2011
NCSC	Andropogon virginicus L. var. decipiens C.S. Campb.	Poaceae	Monocots	sensu Weakley 2012	U.S.A.	NC	Pender	in savanna on east side of Alligator Lake Road, immediately south of junction with Flo Road	Very Wet Loamy Pine Savanna (sensu Schafale 2012)		8 m. msl	34deg.34'54.2" N	77deg.38'38.5" W	50	Robert Thornhill	20	16	10	2010
NCSC	Andropogon virginicus L. var. decipiens C.S. Campb.	Poaceae	Monocots	sensu Weakley 2012	U.S.A.	NC	Pender	in savanna on east side of Alligator Lake Road, immediately south of junction with Flo Road	Very Wet Loamy Pine Savanna (sensu Schafale 2012)		8 m. msl	34deg.34'54.2" N	77deg.38'38.5" W	50	Robert Thornhill	20	16	10	2010
NCSC	Andropogon virginicus L. var. decipiens C.S. Campb.	Poaceae	Monocots	sensu Weakley 2012	U.S.A.	NC	Pender	in savanna on east side of Alligator Lake Road, immediately south of junction with Flo Road	Very Wet Loamy Pine Savanna (sensu Schafale 2012)		8 m. msl	34deg.34'54.2" N	77deg.38'38.5" W	50	Robert Thornhill	1112	16	9	2011
NCSC	Andropogon virginicus L. var. decipiens C.S. Campb.	Poaceae	Monocots	sensu Weakley 2012	U.S.A.	NC	Pender	in savanna on east side of Alligator Lake Road, immediately south of junction with Flo Road	Very Wet Loamy Pine Savanna (sensu Schafale 2012)		8 m. msl	34deg.34'54.2" N	77deg.38'38.5" W	50	Robert Thornhill	1194	23	10	2011
NCSC	Andropogon virginicus L. var. decipiens C.S. Campb.	Poaceae	Monocots	sensu Weakley 2012	U.S.A.	NC	Pender	in savanna on east side of Alligator Lake Road, immediately south of junction with Flo Road	Very Wet Loamy Pine Savanna (sensu Schafale 2012)		8 m. msl	34deg.34'54.2" N	77deg.38'38.5" W	50	Robert Thornhill	1195	23	10	2011
NCSC	Andropogon virginicus L. var. decipiens C.S. Campb.	Poaceae	Monocots	sensu Weakley 2012	U.S.A.	NC	Pender	in savanna on east side of Alligator Lake Road, immediately south of junction with Flo Road	Very Wet Loamy Pine Savanna (sensu Schafale 2012)		8 m. msl	34deg.34'54.2" N	77deg.38'38.5" W	50	Robert Thornhill	1195	23	10	2011
NCSC	Andropogon virginicus L. var. decipiens C.S. Campb.	Poaceae	Monocots	sensu Weakley 2012	U.S.A.	NC	Pender	in Spodosol savanna on east side of Half Moon Road, 0.5-1.5 km southwest of intersection of Half Moon Road and Flo Road	Sandy Pine Savanna (Typic subtype) sensu Schafale 2012		9 m. msl	34deg.35'15.7" N	77deg.40'16.0" W	500	Robert Thornhill	1217	28	10	2011
NCSC	Andropogon virginicus L. var. decipiens C.S. Campb.	Poaceae	Monocots	sensu Weakley 2012	U.S.A.	NC	Pender	in Spodosol savanna on east side of Half Moon Road, 0.5-1.5 km southwest of intersection of Half Moon Road and Flo Road	Sandy Pine Savanna (Typic subtype) sensu Schafale 2012		9 m. msl	34deg.35'15.7" N	77deg.40'16.0" W	500	Robert Thornhill	1217	28	10	2011
NCSC	Andropogon virginicus L. var. virginicus	Poaceae	Monocots	sensu Weakley 2012	U.S.A.	NC	Pender	in Spodosol savanna on east side of Half Moon Road, 0.5-1.5 km southwest of intersection of Half Moon Road and Flo Road	Sandy Pine Savanna (Typic subtype) sensu Schafale 2012		9 m. msl	34deg.35'15.7" N	77deg.40'16.0" W	500	Robert Thornhill	808	4	8	2011		y
NCSC	Andropogon virginicus L. var. virginicus	Poaceae	Monocots	sensu Weakley 2012	U.S.A.	NC	Pender	in Spodosol savanna on east side of Half Moon Road, 0.5-1.5 km southwest of intersection of Half Moon Road and Flo Road	Sandy Pine Savanna (Typic subtype) sensu Schafale 2012		9 m. msl	34deg.35'15.7" N	77deg.40'16.0" W	500	Robert Thornhill	808	4	8	2011		y
NCSC	Andropogon virginicus L. var. virginicus	Poaceae	Monocots	sensu Weakley 2012	U.S.A.	NC	Pender	in Spodosol savanna on east side of Half Moon Road, 0.5-1.5 km southwest of intersection of Half Moon Road and Flo Road	Sandy Pine Savanna (Typic subtype) sensu Schafale 2012		9 m. msl	34deg.35'15.7" N	77deg.40'16.0" W	500	Robert Thornhill	1216	28	10	2011
NCSC	Andropogon virginicus L. var. virginicus	Poaceae	Monocots	sensu Weakley 2012	U.S.A.	NC	Pender	in Spodosol savanna on east side of Half Moon Road, 0.5-1.5 km southwest of intersection of Half Moon Road and Flo Road	Sandy Pine Savanna (Typic subtype) sensu Schafale 2012		9 m. msl	34deg.35'15.7" N	77deg.40'16.0" W	500	Robert Thornhill	1216	28	10	2011
NCSC	Andropogon virginicus L. var. virginicus	Poaceae	Monocots	sensu Weakley 2012	U.S.A.	NC	Pender	in savanna immediately south of Flo Road, approximately 0.3km east of intersection of Flo Road and Fill Road	Wet Loamy Pine Savanna (sensu Schafale 2012)		8 m. msl	34deg.34'56.3" N	77deg.38'48.6" W	50	Robert Thornhill	1245	6	11	2011
NCSC	Anthenantia rufa (Elliott) Schult.	Poaceae	Monocots	sensu Weakley 2012	U.S.A.	NC	Pender	in savanna on east side of Alligator Lake Road, immediately south of junction with Flo Road	Very Wet Loamy Pine Savanna (sensu Schafale 2012)	occasional	8 m. msl	34deg.34'54.2" N	77deg.38'38.5" W	50	Robert Thornhill	687	21	7	2011
NCSC	Anthenantia rufa (Elliott) Schult.	Poaceae	Monocots	sensu Weakley 2012	U.S.A.	NC	Pender	in savanna on east side of Alligator Lake Road, immediately south of junction with Flo Road	Very Wet Loamy Pine Savanna (sensu Schafale 2012)	occasional	8 m. msl	34deg.34'54.2" N	77deg.38'38.5" W	50	Robert Thornhill	857	12	8	2011		y
NCSC	Anthenantia rufa (Elliott) Schult.	Poaceae	Monocots	sensu Weakley 2012	U.S.A.	NC	Pender	in savanna on east side of Alligator Lake Road, immediately south of junction with Flo Road	Very Wet Loamy Pine Savanna (sensu Schafale 2012)	occasional	8 m. msl	34deg.34'54.2" N	77deg.38'38.5" W	50	Robert Thornhill	981	26	8	2011
NCSC	Anthenantia rufa (Elliott) Schult.	Poaceae	Monocots	sensu Weakley 2012	U.S.A.	NC	Pender	in Spodosol savanna on east side of Half Moon Road, 0.5-1.5 km southwest of intersection of Half Moon Road and Flo Road	Sandy Pine Savanna (Typic subtype) sensu Schafale 2012		9 m. msl	34deg.35'15.7" N	77deg.40'16.0" W	500	Robert Thornhill	812	4	8	2011		y
NCSC	Anthenantia rufa (Elliott) Schult.	Poaceae	Monocots	sensu Weakley 2012	U.S.A.	NC	Pender	in Spodosol savanna on east side of Half Moon Road, 0.5-1.5 km southwest of intersection of Half Moon Road and Flo Road	Sandy Pine Savanna (Typic subtype) sensu Schafale 2012		9 m. msl	34deg.35'15.7" N	77deg.40'16.0" W	500	Robert Thornhill	812	4	8	2011		y
NCSC	Anthenantia rufa (Elliott) Schult.	Poaceae	Monocots	sensu Weakley 2012	U.S.A.	NC	Pender	in large savanna immediately south of intersection of Flo Road and Fill Road	Wet Loamy Pine Savanna (sensu Schafale 2012)	occasional	8 m. msl	34deg.34'54.7" N	77deg.39'9.0" W	100	Robert Thornhill	53	16	10	2010
NCSC	Anthenantia rufa (Elliott) Schult.	Poaceae	Monocots	sensu Weakley 2012	U.S.A.	NC	Pender	in large savanna immediately south of intersection of Flo Road and Fill Road	Wet Loamy Pine Savanna (sensu Schafale 2012)	occasional	8 m. msl	34deg.34'54.7" N	77deg.39'9.0" W	100	Robert Thornhill	53	16	10	2010
NCSC	Anthenantia rufa (Elliott) Schult.	Poaceae	Monocots	sensu Weakley 2012	U.S.A.	NC	Pender	in large savanna immediately south of intersection of Flo Road and Fill Road	Wet Loamy Pine Savanna (sensu Schafale 2012)	occasional	8 m. msl	34deg.34'54.7" N	77deg.39'9.0" W	100	Robert Thornhill	53	16	10	2010
NCSC	Anthenantia rufa (Elliott) Schult.	Poaceae	Monocots	sensu Weakley 2012	U.S.A.	NC	Pender	in savanna immediately south of Flo Road, approximately 0.3km east of intersection of Flo Road and Fill Road	Wet Loamy Pine Savanna (sensu Schafale 2012)	occasional	8 m. msl	34deg.34'56.3" N	77deg.38'48.6" W	50	Robert Thornhill	878	12	8	2011
NCSC	Aristida palustris (Chapm.) Vasey	Poaceae	Monocots	sensu Weakley 2012	U.S.A.	NC	Pender	in savanna on east side of Alligator Lake Road, immediately south of junction with Flo Road	Very Wet Loamy Pine Savanna (sensu Schafale 2012)	frequent	8 m. msl	34deg.34'54.2" N	77deg.38'38.5" W	50	Robert Thornhill	1059	9	9	2011
NCSC	Aristida palustris (Chapm.) Vasey	Poaceae	Monocots	sensu Weakley 2012	U.S.A.	NC	Pender	in large savanna immediately south of intersection of Flo Road and Fill Road	Wet Loamy Pine Savanna (sensu Schafale 2012)		8 m. msl	34deg.34'54.7" N	77deg.39'9.0" W	100	Robert Thornhill	631	14	7	2011
NCSC	Aristida palustris (Chapm.) Vasey	Poaceae	Monocots	sensu Weakley 2012	U.S.A.	NC	Pender	in large savanna immediately south of intersection of Flo Road and Fill Road	Wet Loamy Pine Savanna (sensu Schafale 2012)	frequent	8 m. msl	34deg.34'54.7" N	77deg.39'9.0" W	100	Robert Thornhill	776	3	8	2011
NCSC	Aristida palustris (Chapm.) Vasey	Poaceae	Monocots	sensu Weakley 2012	U.S.A.	NC	Pender	in large savanna immediately south of intersection of Flo Road and Fill Road	Wet Loamy Pine Savanna (sensu Schafale 2012)	frequent	8 m. msl	34deg.34'54.7" N	77deg.39'9.0" W	100	Robert Thornhill	788	3	8	2011
NCSC	Aristida stricta Michx.	Poaceae	Monocots	sensu Weakley 2012	U.S.A.	NC	Pender	in pine savannas along Flo Road, approximately 0.4-1.2 km southeast of junction with Half Moon Road	Sandy Pine Savanna (Rush Featherling subtype) sensu Schafale 2012	abundant	9 m. msl	34deg.35'11.9" N	77deg.39'45.9" W	400	Robert Thornhill	653	14	7	2011		y
NCSC	Aristida stricta Michx.	Poaceae	Monocots	sensu Weakley 2012	U.S.A.	NC	Pender	in pine savannas along Flo Road, approximately 0.4-1.2 km southeast of junction with Half Moon Road	Sandy Pine Savanna (Rush Featherling subtype) sensu Schafale 2012	abundant	9 m. msl	34deg.35'11.9" N	77deg.39'45.9" W	400	Robert Thornhill	653	14	7	2011		y
NCSC	Aristida stricta Michx.	Poaceae	Monocots	sensu Weakley 2012	U.S.A.	NC	Pender	in pine savannas along Flo Road, approximately 0.4-1.2 km southeast of junction with Half Moon Road	Sandy Pine Savanna (Rush Featherling subtype) sensu Schafale 2012	abundant	9 m. msl	34deg.35'11.9" N	77deg.39'45.9" W	400	Robert Thornhill	820	4	8	2011
NCSC	Aristida stricta Michx.	Poaceae	Monocots	sensu Weakley 2012	U.S.A.	NC	Pender	in savanna on east side of Alligator Lake Road, immediately south of junction with Flo Road	Very Wet Loamy Pine Savanna (sensu Schafale 2012)	occasional	8 m. msl	34deg.34'54.2" N	77deg.38'38.5" W	50	Robert Thornhill	1020	2	9	2011
NCSC	Aristida stricta Michx.	Poaceae	Monocots	sensu Weakley 2012	U.S.A.	NC	Pender	in savanna on east side of Alligator Lake Road, immediately south of junction with Flo Road	Very Wet Loamy Pine Savanna (sensu Schafale 2012)	occasional	8 m. msl	34deg.34'54.2" N	77deg.38'38.5" W	50	Robert Thornhill	1020	2	9	2011
NCSC	Aristida stricta Michx.	Poaceae	Monocots	sensu Weakley 2012	U.S.A.	NC	Pender	in savanna on east side of Alligator Lake Road, immediately south of junction with Flo Road	Very Wet Loamy Pine Savanna (sensu Schafale 2012)	occasional	8 m. msl	34deg.34'54.2" N	77deg.38'38.5" W	50	Robert Thornhill	1072	16	9	2011
NCSC	Aristida virgata Trin.	Poaceae	Monocots	sensu Weakley 2012	U.S.A.	NC	Pender	in pine savannas along Flo Road, approximately 0.4-1.2 km southeast of junction with Half Moon Road	Sandy Pine Savanna (Rush Featherling subtype) sensu Schafale 2012	frequent	9 m. msl	34deg.35'11.9" N	77deg.39'45.9" W	400	Robert Thornhill	964	26	8	2011
NCSC	Aristida virgata Trin.	Poaceae	Monocots	sensu Weakley 2012	U.S.A.	NC	Pender	along Flo Road, 0.4-1.2 km southeast of junction with Half Moon Road	sandy roadside margin, adjacent to pine savanna		9 m. msl	34deg.35'11.9" N	77deg.39'45.9" W	400	Robert Thornhill	641	14	7	2011
NCSC	Aristida virgata Trin.	Poaceae	Monocots	sensu Weakley 2012	U.S.A.	NC	Pender	along Flo Road, 0.4-1.2 km southeast of junction with Half Moon Road	sandy roadside margin, adjacent to pine savanna		9 m. msl	34deg.35'11.9" N	77deg.39'45.9" W	400	Robert Thornhill	641	14	7	2011
NCSC	Aristida virgata Trin.	Poaceae	Monocots	sensu Weakley 2012	U.S.A.	NC	Pender	in savanna on east side of Alligator Lake Road, immediately south of junction with Flo Road	Very Wet Loamy Pine Savanna (sensu Schafale 2012)		8 m. msl	34deg.34'54.2" N	77deg.38'38.5" W	50	Robert Thornhill	858	12	8	2011
NCSC	Aristida virgata Trin.	Poaceae	Monocots	sensu Weakley 2012	U.S.A.	NC	Pender	in Spodosol savanna on east side of Half Moon Road, 0.5-1.5 km southwest of intersection of Half Moon Road and Flo Road	Sandy Pine Savanna (Typic subtype) sensu Schafale 2012	occasional	9 m. msl	34deg.35'15.7" N	77deg.40'16.0" W	500	Robert Thornhill	912	19	8	2011
NCSC	Aristida virgata Trin.	Poaceae	Monocots	sensu Weakley 2012	U.S.A.	NC	Pender	in Spodosol savanna on east side of Half Moon Road, 0.5-1.5 km southwest of intersection of Half Moon Road and Flo Road	Sandy Pine Savanna (Typic subtype) sensu Schafale 2012	occasional	9 m. msl	34deg.35'15.7" N	77deg.40'16.0" W	500	Robert Thornhill	913	19	8	2011
NCSC	Aristida virgata Trin.	Poaceae	Monocots	sensu Weakley 2012	U.S.A.	NC	Pender	in large savanna immediately south of intersection of Flo Road and Fill Road	Wet Loamy Pine Savanna (sensu Schafale 2012)		8 m. msl	34deg.34'54.7" N	77deg.39'9.0" W	100	Robert Thornhill	1057	9	9	2011
NCSC	Aristida virgata Trin.	Poaceae	Monocots	sensu Weakley 2012	U.S.A.	NC	Pender	in large savanna immediately south of intersection of Flo Road and Fill Road	Wet Loamy Pine Savanna (sensu Schafale 2012)		8 m. msl	34deg.34'54.7" N	77deg.39'9.0" W	100	Robert Thornhill	1058	9	9	2011
NCSC	Aristida virgata Trin.	Poaceae	Monocots	sensu Weakley 2012	U.S.A.	NC	Pender	in large savanna immediately south of intersection of Flo Road and Fill Road	Wet Loamy Pine Savanna (sensu Schafale 2012)		8 m. msl	34deg.34'54.7" N	77deg.39'9.0" W	100	Robert Thornhill	787	3	8	2011
NCSC	Arundinaria tecta (Walter) Muhl.	Poaceae	Monocots	sensu Weakley 2012	U.S.A.	NC	Pender	along Alligator Lake Road, 0-0.4 km south of junction with Flo Road	sandy roadside margin, adjacent to pine savanna	occasional	8 m. msl	34deg.34'54.5" N	77deg.38'39.9" W	200	Robert Thornhill	1281	2	5	2012
NCSC	Arundinaria tecta (Walter) Muhl.	Poaceae	Monocots	sensu Weakley 2012	U.S.A.	NC	Pender	in Spodosol savanna on east side of Half Moon Road, 0.5-1.5 km southwest of intersection of Half Moon Road and Flo Road	Sandy Pine Savanna (Typic subtype) sensu Schafale 2012	occasional	9 m. msl	34deg.35'15.7" N	77deg.40'16.0" W	500	Robert Thornhill	916	19	8	2011		y
NCSC	Arundinaria tecta (Walter) Muhl.	Poaceae	Monocots	sensu Weakley 2012	U.S.A.	NC	Pender	in Spodosol savanna on east side of Half Moon Road, 0.5-1.5 km southwest of intersection of Half Moon Road and Flo Road	Sandy Pine Savanna (Typic subtype) sensu Schafale 2012	occasional	9 m. msl	34deg.35'15.7" N	77deg.40'16.0" W	500	Robert Thornhill	917	19	8	2011		y
NCSC	Avena sativa L.	Poaceae	Monocots	sensu Weakley 2012	U.S.A.	NC	Pender	in food plot northwest of intersection of Alligator Lake Road and Flo Road	weedy open area (food plot)	occasional	8 m. msl	34deg.34'59.0" N	77deg.38'46.7" W	100	Robert Thornhill	1283	2	5	2012			food plot north of intersection of Flo Road and Alligator Lake Road
NCSC	Axonopus fissifolius (Raddi) Kuhlm.	Poaceae	Monocots	sensu Weakley 2012	U.S.A.	NC	Pender	along Flo Road, 0.4-1.2 km southeast of junction with Half Moon Road	sandy roadside margin, adjacent to pine savanna	occasional	9 m. msl	34deg.35'11.9" N	77deg.39'45.9" W	400	Robert Thornhill	637	14	7	2011
NCSC	Axonopus fissifolius (Raddi) Kuhlm.	Poaceae	Monocots	sensu Weakley 2012	U.S.A.	NC	Pender	along Flo Road, near intersection with Fill Road	sandy roadside margin, adjacent to pine savanna	occasional	8 m. msl	34deg.34'54.7" N	77deg.39'9.0" W	200	Robert Thornhill	454	9	6	2011
NCSC	Axonopus fissifolius (Raddi) Kuhlm.	Poaceae	Monocots	sensu Weakley 2012	U.S.A.	NC	Pender	in savanna on east side of Alligator Lake Road, immediately south of junction with Flo Road	Very Wet Loamy Pine Savanna (sensu Schafale 2012)	rare	8 m. msl	34deg.34'54.2" N	77deg.38'38.5" W	50	Robert Thornhill	514	10	6	2011
NCSC	Axonopus furcatus (Flüggé) Hitchc.	Poaceae	Monocots	sensu Weakley 2012	U.S.A.	NC	Pender	northern corner of intersection of Bug Ridge Road and Williams Road	weedy roadside	occasional	8 m. msl	34deg.35'54.2" N	77deg.40'5.0" W	5	Robert Thornhill	1371	11	6	2012			corner of Bug Ridge Road and Williams Road
NCSC	Briza minor L.	Poaceae	Monocots	sensu Weakley 2012	U.S.A.	NC	Pender	disturbed open area in powerline right-of-way, immediately east of hunting lodge on Williams Road	disturbed open area in powerline right-of-way	occasional	7 m. msl	34deg.35'56.8" N	77deg.39'56.5" W	10	Robert Thornhill	304	15	5	2011			in powerline cut immediately east of hunting lodge on Williams Road
NCSC	Briza minor L.	Poaceae	Monocots	sensu Weakley 2012	U.S.A.	NC	Pender	in food plot northwest of intersection of Alligator Lake Road and Flo Road	weedy open area (food plot)	occasional	8 m. msl	34deg.34'59.0" N	77deg.38'46.7" W	100	Robert Thornhill	1292	2	5	2012			food plot north of intersection of Flo Road and Alligator Lake Road
NCSC	Calamagrostis coarctata Eaton	Poaceae	Monocots	sensu Weakley 2012	U.S.A.	NC	Pender	in small pine savanna on south side of Flo Road, approximately .1 km west of junction with Alligator Lake Road	Very Wet Loamy Pine Savanna (sensu Schafale 2012)		9 m. msl	34deg.34'58.0" N	77deg.38'41.0" W	20	Robert Thornhill	865	12	8	2011		y
NCSC	Calamagrostis coarctata Eaton	Poaceae	Monocots	sensu Weakley 2012	U.S.A.	NC	Pender	in savanna on east side of Alligator Lake Road, immediately south of junction with Flo Road	Very Wet Loamy Pine Savanna (sensu Schafale 2012)	frequent	8 m. msl	34deg.34'54.2" N	77deg.38'38.5" W	50	Robert Thornhill	973	26	8	2011
NCSC	Calamagrostis coarctata Eaton	Poaceae	Monocots	sensu Weakley 2012	U.S.A.	NC	Pender	in savanna on east side of Alligator Lake Road, immediately south of junction with Flo Road	Very Wet Loamy Pine Savanna (sensu Schafale 2012)		8 m. msl	34deg.34'54.2" N	77deg.38'38.5" W	50	Robert Thornhill	1033	9	9	2011
NCSC	Calamagrostis coarctata Eaton	Poaceae	Monocots	sensu Weakley 2012	U.S.A.	NC	Pender	in savanna on east side of Alligator Lake Road, immediately south of junction with Flo Road	Very Wet Loamy Pine Savanna (sensu Schafale 2012)	frequent	8 m. msl	34deg.34'54.2" N	77deg.38'38.5" W	50	Robert Thornhill	1094	16	9	2011
NCSC	Calamagrostis coarctata Eaton	Poaceae	Monocots	sensu Weakley 2012	U.S.A.	NC	Pender	in savanna on east side of Alligator Lake Road, immediately south of junction with Flo Road	Very Wet Loamy Pine Savanna (sensu Schafale 2012)	occasional	8 m. msl	34deg.34'54.2" N	77deg.38'38.5" W	50	Robert Thornhill	1242	6	11	2011
NCSC	Calamovilfa brevipilis (Torr.) Hack. ex Scribn. & Southw.	Poaceae	Monocots	sensu Weakley 2012	U.S.A.	NC	Pender	in pine savannas along Flo Road, approximately 0.4-1.2 km southeast of junction with Half Moon Road	Sandy Pine Savanna (Rush Featherling subtype) sensu Schafale 2012	occasional	9 m. msl	34deg.35'11.9" N	77deg.39'45.9" W	400	Robert Thornhill	648	14	7	2011		y
NCSC	Calamovilfa brevipilis (Torr.) Hack. ex Scribn. & Southw.	Poaceae	Monocots	sensu Weakley 2012	U.S.A.	NC	Pender	in pine savannas along Flo Road, approximately 0.4-1.2 km southeast of junction with Half Moon Road	Sandy Pine Savanna (Rush Featherling subtype) sensu Schafale 2012	occasional	9 m. msl	34deg.35'11.9" N	77deg.39'45.9" W	400	Robert Thornhill	648	14	7	2011		y
NCSC	Calamovilfa brevipilis (Torr.) Hack. ex Scribn. & Southw.	Poaceae	Monocots	sensu Weakley 2012	U.S.A.	NC	Pender	in pine savannas along Flo Road, approximately 0.4-1.2 km southeast of junction with Half Moon Road	Sandy Pine Savanna (Rush Featherling subtype) sensu Schafale 2012	occasional	9 m. msl	34deg.35'11.9" N	77deg.39'45.9" W	400	Robert Thornhill	963	26	8	2011
NCSC	Calamovilfa brevipilis (Torr.) Hack. ex Scribn. & Southw.	Poaceae	Monocots	sensu Weakley 2012	U.S.A.	NC	Pender	in pine savannas along Flo Road, approximately 0.4-1.2 km southeast of junction with Half Moon Road	Sandy Pine Savanna (Rush Featherling subtype) sensu Schafale 2012	frequent	9 m. msl	34deg.35'11.9" N	77deg.39'45.9" W	400	Robert Thornhill	1063	9	9	2011
NCSC	Calamovilfa brevipilis (Torr.) Hack. ex Scribn. & Southw.	Poaceae	Monocots	sensu Weakley 2012	U.S.A.	NC	Pender	in pine savannas along Flo Road, approximately 0.4-1.2 km southeast of junction with Half Moon Road	Sandy Pine Savanna (Rush Featherling subtype) sensu Schafale 2012	frequent	9 m. msl	34deg.35'11.9" N	77deg.39'45.9" W	400	Robert Thornhill	1063	9	9	2011
NCSC	Calamovilfa brevipilis (Torr.) Hack. ex Scribn. & Southw.	Poaceae	Monocots	sensu Weakley 2012	U.S.A.	NC	Pender	along Flo Road, 0.4-1.2 km southeast of junction with Half Moon Road	sandy roadside margin, adjacent to pine savanna	occasional	9 m. msl	34deg.35'11.9" N	77deg.39'45.9" W	400	Robert Thornhill	640	14	7	2011
NCSC	Chasmanthium laxum (L.) Yates	Poaceae	Monocots	sensu Weakley 2012	U.S.A.	NC	Pender	in pine savannas along Flo Road, approximately 0.4-1.2 km southeast of junction with Half Moon Road	Sandy Pine Savanna (Rush Featherling subtype) sensu Schafale 2012	frequent	9 m. msl	34deg.35'11.9" N	77deg.39'45.9" W	400	Robert Thornhill	647	14	7	2011
NCSC	Chasmanthium laxum (L.) Yates	Poaceae	Monocots	sensu Weakley 2012	U.S.A.	NC	Pender	in savanna on east side of Alligator Lake Road, immediately south of junction with Flo Road	Very Wet Loamy Pine Savanna (sensu Schafale 2012)	occasional	8 m. msl	34deg.34'54.2" N	77deg.38'38.5" W	50	Robert Thornhill	738	21	7	2011
NCSC	Chasmanthium laxum (L.) Yates	Poaceae	Monocots	sensu Weakley 2012	U.S.A.	NC	Pender	in savanna on east side of Alligator Lake Road, immediately south of junction with Flo Road	Very Wet Loamy Pine Savanna (sensu Schafale 2012)	occasional	8 m. msl	34deg.34'54.2" N	77deg.38'38.5" W	50	Robert Thornhill	1198	23	10	2011
NCSC	Chasmanthium laxum (L.) Yates	Poaceae	Monocots	sensu Weakley 2012	U.S.A.	NC	Pender	in large savanna immediately south of intersection of Flo Road and Fill Road	Wet Loamy Pine Savanna (sensu Schafale 2012)	occasional	8 m. msl	34deg.34'54.7" N	77deg.39'9.0" W	100	Robert Thornhill	774	3	8	2011
NCSC	Coelorachis rugosa (Nutt.) Nash	Poaceae	Monocots	sensu Weakley 2012	U.S.A.	NC	Pender	in Spodosol savanna on east side of Half Moon Road, 0.5-1.5 km southwest of intersection of Half Moon Road and Flo Road	Sandy Pine Savanna (Typic subtype) sensu Schafale 2012	occasional	9 m. msl	34deg.35'15.7" N	77deg.40'16.0" W	500	Robert Thornhill	813	4	8	2011		y
NCSC	Coelorachis rugosa (Nutt.) Nash	Poaceae	Monocots	sensu Weakley 2012	U.S.A.	NC	Pender	in savanna immediately south of Flo Road, approximately 0.3km east of intersection of Flo Road and Fill Road	Wet Loamy Pine Savanna (sensu Schafale 2012)	occasional	8 m. msl	34deg.34'56.3" N	77deg.38'48.6" W	50	Robert Thornhill	877	12	8	2011
NCSC	Coleataenia anceps (Michx.) Soreng ssp. anceps	Poaceae	Monocots	sensu Weakley 2012	U.S.A.	NC	Pender	in pine savannas along Flo Road, approximately 0.4-1.2 km southeast of junction with Half Moon Road	Sandy Pine Savanna (Rush Featherling subtype) sensu Schafale 2012	rare	9 m. msl	34deg.35'11.9" N	77deg.39'45.9" W	400	Robert Thornhill	962	26	8	2011
NCSC	Coleataenia anceps (Michx.) Soreng ssp. anceps	Poaceae	Monocots	sensu Weakley 2012	U.S.A.	NC	Pender	in savanna on east side of Alligator Lake Road, immediately south of junction with Flo Road	Very Wet Loamy Pine Savanna (sensu Schafale 2012)		8 m. msl	34deg.34'54.2" N	77deg.38'38.5" W	50	Robert Thornhill	1108	16	9	2011
NCSC	Coleataenia anceps (Michx.) Soreng ssp. anceps	Poaceae	Monocots	sensu Weakley 2012	U.S.A.	NC	Pender	around dog pens on Williams Road, approximately .25 km southwest of hunting lodge	weedy roadside	infrequent	8 m. msl	34deg.35'52.9" N	77deg.40'7.3" W	20	Robert Thornhill	1474	26	7	2012			around dog pens on Williams Road
NCSC	Coleataenia anceps (Michx.) Soreng ssp. rhizomata (Hitchc. & Chase) Soreng	Poaceae	Monocots	sensu Weakley 2012	U.S.A.	NC	Pender	in savanna on east side of Alligator Lake Road, immediately south of junction with Flo Road	Very Wet Loamy Pine Savanna (sensu Schafale 2012)	occasional	8 m. msl	34deg.34'54.2" N	77deg.38'38.5" W	50	Robert Thornhill	1110	16	9	2011
NCSC	Coleataenia anceps (Michx.) Soreng ssp. rhizomata (Hitchc. & Chase) Soreng	Poaceae	Monocots	sensu Weakley 2012	U.S.A.	NC	Pender	in large savanna immediately south of intersection of Flo Road and Fill Road	Wet Loamy Pine Savanna (sensu Schafale 2012)	occasional	8 m. msl	34deg.34'54.7" N	77deg.39'9.0" W	100	Robert Thornhill	782	3	8	2011
NCSC	Coleataenia anceps (Michx.) Soreng ssp. rhizomata (Hitchc. & Chase) Soreng	Poaceae	Monocots	sensu Weakley 2012	U.S.A.	NC	Pender	in large savanna immediately south of intersection of Flo Road and Fill Road	Wet Loamy Pine Savanna (sensu Schafale 2012)	occasional	8 m. msl	34deg.34'54.7" N	77deg.39'9.0" W	100	Robert Thornhill	1054	9	9	2011
NCSC	Coleataenia longifolia (Torr.) Soreng ssp. combsii (Scribn. & C.R. Ball) Soreng	Poaceae	Monocots	sensu Weakley 2012	U.S.A.	NC	Pender	in savanna on east side of Alligator Lake Road, immediately south of junction with Flo Road	Very Wet Loamy Pine Savanna (sensu Schafale 2012)		8 m. msl	34deg.34'54.2" N	77deg.38'38.5" W	50	Robert Thornhill	980	26	8	2011
NCSC	Coleataenia longifolia (Torr.) Soreng ssp. combsii (Scribn. & C.R. Ball) Soreng	Poaceae	Monocots	sensu Weakley 2012	U.S.A.	NC	Pender	in savanna on east side of Alligator Lake Road, immediately south of junction with Flo Road	Very Wet Loamy Pine Savanna (sensu Schafale 2012)		8 m. msl	34deg.34'54.2" N	77deg.38'38.5" W	50	Robert Thornhill	1107	16	9	2011
NCSC	Coleataenia longifolia (Torr.) Soreng ssp. combsii (Scribn. & C.R. Ball) Soreng	Poaceae	Monocots	sensu Weakley 2012	U.S.A.	NC	Pender	in savanna immediately south of Flo Road, approximately 0.3km east of intersection of Flo Road and Fill Road	Wet Loamy Pine Savanna (sensu Schafale 2012)		8 m. msl	34deg.34'56.3" N	77deg.38'48.6" W	50	Robert Thornhill	1127	25	9	2011
NCSC	Coleataenia longifolia (Torr.) Soreng ssp. combsii (Scribn. & C.R. Ball) Soreng	Poaceae	Monocots	sensu Weakley 2012	U.S.A.	NC	Pender	in savanna immediately south of Flo Road, approximately 0.3km east of intersection of Flo Road and Fill Road	Wet Loamy Pine Savanna (sensu Schafale 2012)	occasional	8 m. msl	34deg.34'56.3" N	77deg.38'48.6" W	50	Robert Thornhill	1152	7	10	2011
NCSC	Coleataenia longifolia (Torr.) Soreng ssp. longifolia	Poaceae	Monocots	sensu Weakley 2012	U.S.A.	NC	Pender	in pine savanna on northeast corner of intersection of Flo Road and Fill Road	Very Wet Loamy Pine Savanna (sensu Schafale 2012)	occasional	8 m. msl	34deg.35'0.1" N	77deg.38'59.2" W	50	Robert Thornhill	1159	7	10	2011
NCSC	Coleataenia longifolia (Torr.) Soreng ssp. longifolia	Poaceae	Monocots	sensu Weakley 2012	U.S.A.	NC	Pender	in pine savannas along Flo Road, approximately 0.4-1.2 km southeast of junction with Half Moon Road	Sandy Pine Savanna (Rush Featherling subtype) sensu Schafale 2012		9 m. msl	34deg.35'11.9" N	77deg.39'45.9" W	400	Robert Thornhill	13	17	9	2010
NCSC	Coleataenia longifolia (Torr.) Soreng ssp. longifolia	Poaceae	Monocots	sensu Weakley 2012	U.S.A.	NC	Pender	in pine savannas along Flo Road, approximately 0.4-1.2 km southeast of junction with Half Moon Road	Sandy Pine Savanna (Rush Featherling subtype) sensu Schafale 2012		9 m. msl	34deg.35'11.9" N	77deg.39'45.9" W	400	Robert Thornhill	13	17	9	2010
NCSC	Coleataenia longifolia (Torr.) Soreng ssp. longifolia	Poaceae	Monocots	sensu Weakley 2012	U.S.A.	NC	Pender	in Spodosol savanna on east side of Half Moon Road, 0.5-1.5 km southwest of intersection of Half Moon Road and Flo Road	Sandy Pine Savanna (Typic subtype) sensu Schafale 2012		9 m. msl	34deg.35'15.7" N	77deg.40'16.0" W	500	Robert Thornhill	26	21	8	2010
NCSC	Coleataenia longifolia (Torr.) Soreng ssp. longifolia	Poaceae	Monocots	sensu Weakley 2012	U.S.A.	NC	Pender	in Spodosol savanna on east side of Half Moon Road, 0.5-1.5 km southwest of intersection of Half Moon Road and Flo Road	Sandy Pine Savanna (Typic subtype) sensu Schafale 2012	occasional	9 m. msl	34deg.35'15.7" N	77deg.40'16.0" W	500	Robert Thornhill	936	19	8	2011
NCSC	Coleataenia longifolia (Torr.) Soreng ssp. longifolia	Poaceae	Monocots	sensu Weakley 2012	U.S.A.	NC	Pender	in Spodosol savanna on east side of Half Moon Road, 0.5-1.5 km southwest of intersection of Half Moon Road and Flo Road	Sandy Pine Savanna (Typic subtype) sensu Schafale 2012	occasional	9 m. msl	34deg.35'15.7" N	77deg.40'16.0" W	500	Robert Thornhill	1126	25	9	2011
NCSC	Coleataenia longifolia (Torr.) Soreng ssp. longifolia	Poaceae	Monocots	sensu Weakley 2012	U.S.A.	NC	Pender	in Spodosol savanna on east side of Half Moon Road, 0.5-1.5 km southwest of intersection of Half Moon Road and Flo Road	Sandy Pine Savanna (Typic subtype) sensu Schafale 2012	frequent	9 m. msl	34deg.35'15.7" N	77deg.40'16.0" W	500	Robert Thornhill	1221	28	10	2011
NCSC	Ctenium aromaticum (Walter) Alph. Wood	Poaceae	Monocots	sensu Weakley 2012	U.S.A.	NC	Pender	in pine savannas along Flo Road, approximately 0.4-1.2 km southeast of junction with Half Moon Road	Sandy Pine Savanna (Rush Featherling subtype) sensu Schafale 2012	occasional	9 m. msl	34deg.35'11.9" N	77deg.39'45.9" W	400	Robert Thornhill	649	14	7	2011
NCSC	Ctenium aromaticum (Walter) Alph. Wood	Poaceae	Monocots	sensu Weakley 2012	U.S.A.	NC	Pender	in savanna .18 km south of Flo Road at a point approximately 0.3km east of intersection of Flo Road and Fill Road	Very Wet Loamy Pine Savanna (sensu Schafale 2012)		8 m. msl	34deg.34'50.5" N	77deg.38'46.6" W	50	Robert Thornhill	318	30	5	2011		y
NCSC	Ctenium aromaticum (Walter) Alph. Wood	Poaceae	Monocots	sensu Weakley 2012	U.S.A.	NC	Pender	in Spodosol savanna on east side of Half Moon Road, 0.5-1.5 km southwest of intersection of Half Moon Road and Flo Road	Sandy Pine Savanna (Typic subtype) sensu Schafale 2012		9 m. msl	34deg.35'15.7" N	77deg.40'16.0" W	500	Robert Thornhill	539	21	6	2011
NCSC	Ctenium aromaticum (Walter) Alph. Wood	Poaceae	Monocots	sensu Weakley 2012	U.S.A.	NC	Pender	in large savanna immediately south of intersection of Flo Road and Fill Road	Wet Loamy Pine Savanna (sensu Schafale 2012)		8 m. msl	34deg.34'54.7" N	77deg.39'9.0" W	100	Robert Thornhill	449	9	6	2011		y
NCSC	Cynodon dactylon (L.) Pers. var. dactylon	Poaceae	Monocots	sensu FNA	U.S.A.	NC	Pender	in lawn around hunting lodge on Williams Road, just south of Shelter Swamp Creek	moist lawn	occasional	8 m. msl	34deg.35'57.5" N	77deg.39'58.8" W	5	Robert Thornhill	1344	3	6	2012			in lawn in front of lodge on Williams Road
NCSC	Danthonia sericea Nutt.	Poaceae	Monocots	sensu Weakley 2012	U.S.A.	NC	Pender	in flatwoods/savanna approximately 80 meters north of intersection of Alligator Lake Road and Flo Road, just east of food plot	Mesic Pine Savanna (Coastal Plain subtype) sensu Schafale 2012	occasional	9 m. msl	34deg.35'0.8" N	77deg.38'37.7" W	50	Robert Thornhill	1288	11	5	2012		y
NCSC	Danthonia sericea Nutt.	Poaceae	Monocots	sensu Weakley 2012	U.S.A.	NC	Pender	in flatwoods/savanna approximately 80 meters north of intersection of Alligator Lake Road and Flo Road, just east of food plot	Mesic Pine Savanna (Coastal Plain subtype) sensu Schafale 2012	occasional	9 m. msl	34deg.35'0.8" N	77deg.38'37.7" W	50	Robert Thornhill	1288	11	5	2012		y
NCSC	Danthonia sericea Nutt.	Poaceae	Monocots	sensu Weakley 2012	U.S.A.	NC	Pender	in flatwoods/savanna approximately 80 meters north of intersection of Alligator Lake Road and Flo Road, just east of food plot	Mesic Pine Savanna (Coastal Plain subtype) sensu Schafale 2012	occasional	9 m. msl	34deg.35'0.8" N	77deg.38'37.7" W	50	Robert Thornhill	1288	11	5	2012		y
NCSC	Dichanthelium acuminatum (Sw.) Gould & C.A. Clark var. fasciculatum (Torr.) Freckmann	Poaceae	Monocots	sensu Weakley 2012	U.S.A.	NC	Pender	in savanna .18 km south of Flo Road at a point approximately 0.3km east of intersection of Flo Road and Fill Road	Very Wet Loamy Pine Savanna (sensu Schafale 2012)		8 m. msl	34deg.34'50.5" N	77deg.38'46.6" W	50	Robert Thornhill	272	15	5	2011
NCSC	Dichanthelium caerulescens (Hack. ex Hitchc.) Correll	Poaceae	Monocots	sensu Weakley 2012	U.S.A.	NC	Pender		Very Wet Loamy Pine Savanna (sensu Schafale 2012)	rare				50	Robert Thornhill	1308	3	6	2012
NCSC	Dichanthelium chamaelonche (Trin.) Freckmann & Lelong ssp. chamaelonche	Poaceae	Monocots	sensu Weakley 2012	U.S.A.	NC	Pender	in dry ridge approximately .2 km north and then .1 km west from fork in Mule Pen Road (i.e., 2 km west of junction with Williams Road)	Mesic Pine Savanna (Coastal Plain subtype) sensu Schafale 2012	occasional	8 m. msl	34deg.35'41.0" N	77deg.42'25.8" W	50	Robert Thornhill	1297	22	5	2012
NCSC	Dichanthelium commutatum (Schult.) Gould var. commutatum	Poaceae	Monocots	sensu Weakley 2012	U.S.A.	NC	Pender	in swamp on south side of Flo Road, approximately 1.2 km east of junction with Alligator Lake Road	swamp forest	infrequent	8 m. msl	34deg.34'50.0" N	77deg.37'59.0" W	100	Robert Thornhill	1494	26	7	2012			in swamp on south side of Flo Road, approximately 1 mi east of intersection with Alligator Lake Road
NCSC	Dichanthelium consanguineum (Kunth) Gould & C.A. Clark	Poaceae	Monocots	sensu Weakley 2012	U.S.A.	NC	Pender	in large savanna immediately south of intersection of Flo Road and Fill Road	Wet Loamy Pine Savanna (sensu Schafale 2012)		8 m. msl	34deg.34'54.7" N	77deg.39'9.0" W	100	Robert Thornhill	285	15	5	2011
NCSC	Dichanthelium consanguineum (Kunth) Gould & C.A. Clark	Poaceae	Monocots	sensu Weakley 2012	U.S.A.	NC	Pender	in pine savannas along Flo Road, approximately 0.4-1.2 km southeast of junction with Half Moon Road	Sandy Pine Savanna (Rush Featherling subtype) sensu Schafale 2012	occasional	9 m. msl	34deg.35'11.9" N	77deg.39'45.9" W	400	Robert Thornhill	1295	22	5	2012
NCSC	Dichanthelium consanguineum (Kunth) Gould & C.A. Clark	Poaceae	Monocots	sensu Weakley 2012	U.S.A.	NC	Pender	in savanna on east side of Alligator Lake Road, immediately south of junction with Flo Road	Very Wet Loamy Pine Savanna (sensu Schafale 2012)		8 m. msl	34deg.34'54.2" N	77deg.38'38.5" W	50	Robert Thornhill	246	15	5	2011		y
NCSC	Dichanthelium consanguineum (Kunth) Gould & C.A. Clark	Poaceae	Monocots	sensu Weakley 2012	U.S.A.	NC	Pender	in large savanna immediately south of intersection of Flo Road and Fill Road	Wet Loamy Pine Savanna (sensu Schafale 2012)		8 m. msl	34deg.34'54.7" N	77deg.39'9.0" W	100	Robert Thornhill	296	15	5	2011
NCSC	Dichanthelium dichotomum (L.) Gould var. nitidum (Lam.) LeBlond	Poaceae	Monocots	sensu Weakley 2012	U.S.A.	NC	Pender	in large savanna immediately south of intersection of Flo Road and Fill Road	Wet Loamy Pine Savanna (sensu Schafale 2012)		8 m. msl	34deg.34'54.7" N	77deg.39'9.0" W	100	Robert Thornhill	312	30	5	2011		y
NCSC	Dichanthelium dichotomum (L.) Gould var. roanokense (Ashe) LeBlond	Poaceae	Monocots	sensu Weakley 2012	U.S.A.	NC	Pender	in savanna .18 km south of Flo Road at a point approximately 0.3km east of intersection of Flo Road and Fill Road	Very Wet Loamy Pine Savanna (sensu Schafale 2012)		8 m. msl	34deg.34'50.5" N	77deg.38'46.6" W	50	Robert Thornhill	273	15	5	2011
NCSC	Dichanthelium dichotomum (L.) Gould var. roanokense (Ashe) LeBlond	Poaceae	Monocots	sensu Weakley 2012	U.S.A.	NC	Pender	in large savanna immediately south of intersection of Flo Road and Fill Road	Wet Loamy Pine Savanna (sensu Schafale 2012)	occasional	8 m. msl	34deg.34'54.7" N	77deg.39'9.0" W	100	Robert Thornhill	347	30	5	2011		y
NCSC	Dichanthelium dichotomum (L.) Gould var. roanokense (Ashe) LeBlond	Poaceae	Monocots	sensu Weakley 2012	U.S.A.	NC	Pender	in pine savannas along Flo Road, approximately 0.4-1.2 km southeast of junction with Half Moon Road	Sandy Pine Savanna (Rush Featherling subtype) sensu Schafale 2012	frequent	9 m. msl	34deg.35'11.9" N	77deg.39'45.9" W	400	Robert Thornhill	960	26	8	2011		y
NCSC	Dichanthelium ensifolium (Baldwin ex Elliott) Gould	Poaceae	Monocots	sensu Weakley 2012	U.S.A.	NC	Pender	in large savanna immediately south of intersection of Flo Road and Fill Road	Wet Loamy Pine Savanna (sensu Schafale 2012)	occasional	8 m. msl	34deg.34'54.7" N	77deg.39'9.0" W	100	Robert Thornhill	361	30	5	2011
NCSC	Dichanthelium ensifolium (Baldwin ex Elliott) Gould	Poaceae	Monocots	sensu Weakley 2012	U.S.A.	NC	Pender	in Spodosol savanna on east side of Half Moon Road, 0.5-1.5 km southwest of intersection of Half Moon Road and Flo Road	Sandy Pine Savanna (Typic subtype) sensu Schafale 2012	frequent	9 m. msl	34deg.35'15.7" N	77deg.40'16.0" W	500	Robert Thornhill	400	31	5	2011
NCSC	Dichanthelium ensifolium (Baldwin ex Elliott) Gould	Poaceae	Monocots	sensu Weakley 2012	U.S.A.	NC	Pender	in pine savanna on northeast corner of intersection of Flo Road and Fill Road	Very Wet Loamy Pine Savanna (sensu Schafale 2012)	occasional	8 m. msl	34deg.35'0.1" N	77deg.38'59.2" W	50	Robert Thornhill	1161	7	10	2011
NCSC	Dichanthelium ensifolium (Baldwin ex Elliott) Gould	Poaceae	Monocots	sensu Weakley 2012	U.S.A.	NC	Pender	spodosol ridge approximately 0.4 km west of Flo Road at a point 0.6 km northwest of intersection of Flo Road and Williams Road	Wet Pine Flatwoods (Typic subtype ) sensu Schafale 2012	occasional	9 m. msl	34deg.36'10.5" N	77deg.40'42.3" W	100	Robert Thornhill	1294	22	5	2012
NCSC	Dichanthelium ensifolium (Baldwin ex Elliott) Gould	Poaceae	Monocots	sensu Weakley 2012	U.S.A.	NC	Pender	in savanna .18 km south of Flo Road at a point approximately 0.3km east of intersection of Flo Road and Fill Road	Very Wet Loamy Pine Savanna (sensu Schafale 2012)	occasional	8 m. msl	34deg.34'50.5" N	77deg.38'46.6" W	50	Robert Thornhill	276	15	5	2011
NCSC	Dichanthelium ensifolium (Baldwin ex Elliott) Gould	Poaceae	Monocots	sensu Weakley 2012	U.S.A.	NC	Pender	in large savanna immediately south of intersection of Flo Road and Fill Road	Wet Loamy Pine Savanna (sensu Schafale 2012)		8 m. msl	34deg.34'54.7" N	77deg.39'9.0" W	100	Robert Thornhill	288	15	5	2011
NCSC	Dichanthelium leucothrix (Nash) Freckmann	Poaceae	Monocots	sensu Weakley 2012	U.S.A.	NC	Pender	in pine savanna on northeast corner of intersection of Flo Road and Fill Road	Very Wet Loamy Pine Savanna (sensu Schafale 2012)	occasional	8 m. msl	34deg.35'0.1" N	77deg.38'59.2" W	50	Robert Thornhill	402	31	5	2011
NCSC	Dichanthelium leucothrix (Nash) Freckmann	Poaceae	Monocots	sensu Weakley 2012	U.S.A.	NC	Pender	in pine savanna on northeast corner of intersection of Flo Road and Fill Road	Very Wet Loamy Pine Savanna (sensu Schafale 2012)	occasional	8 m. msl	34deg.35'0.1" N	77deg.38'59.2" W	50	Robert Thornhill	928	19	8	2011
NCSC	Dichanthelium leucothrix (Nash) Freckmann	Poaceae	Monocots	sensu Weakley 2012	U.S.A.	NC	Pender	in Spodosol savanna on east side of Half Moon Road, 0.5-1.5 km southwest of intersection of Half Moon Road and Flo Road	Sandy Pine Savanna (Typic subtype) sensu Schafale 2012	frequent	9 m. msl	34deg.35'15.7" N	77deg.40'16.0" W	500	Robert Thornhill	1293	22	5	2012
NCSC	Dichanthelium leucothrix (Nash) Freckmann	Poaceae	Monocots	sensu Weakley 2012	U.S.A.	NC	Pender	in Spodosol savanna on east side of Half Moon Road, 0.5-1.5 km southwest of intersection of Half Moon Road and Flo Road	Sandy Pine Savanna (Typic subtype) sensu Schafale 2012		9 m. msl	34deg.35'15.7" N	77deg.40'16.0" W	500	Robert Thornhill	268	15	5	2011
NCSC	Dichanthelium leucothrix (Nash) Freckmann	Poaceae	Monocots	sensu Weakley 2012	U.S.A.	NC	Pender	in Spodosol savanna on east side of Half Moon Road, 0.5-1.5 km southwest of intersection of Half Moon Road and Flo Road	Sandy Pine Savanna (Typic subtype) sensu Schafale 2012		9 m. msl	34deg.35'15.7" N	77deg.40'16.0" W	500	Robert Thornhill	268	15	5	2011
NCSC	Dichanthelium leucothrix (Nash) Freckmann	Poaceae	Monocots	sensu Weakley 2012	U.S.A.	NC	Pender	in savanna immediately south of Flo Road, approximately 0.3km east of intersection of Flo Road and Fill Road	Wet Loamy Pine Savanna (sensu Schafale 2012)	occasional	8 m. msl	34deg.34'56.3" N	77deg.38'48.6" W	50	Robert Thornhill	1309	3	6	2012
NCSC	Dichanthelium longiligulatum (Nash) Freckmann	Poaceae	Monocots	sensu Weakley 2012	U.S.A.	NC	Pender	in Spodosol savanna on east side of Half Moon Road, 0.5-1.5 km southwest of intersection of Half Moon Road and Flo Road	Sandy Pine Savanna (Typic subtype) sensu Schafale 2012	infrequent	9 m. msl	34deg.35'15.7" N	77deg.40'16.0" W	500	Robert Thornhill	401	31	5	2011
NCSC	Dichanthelium longiligulatum (Nash) Freckmann	Poaceae	Monocots	sensu Weakley 2012	U.S.A.	NC	Pender	in savanna on east side of Alligator Lake Road, immediately south of junction with Flo Road	Very Wet Loamy Pine Savanna (sensu Schafale 2012)		8 m. msl	34deg.34'54.2" N	77deg.38'38.5" W	50	Robert Thornhill	440	9	6	2011
NCSC	Dichanthelium longiligulatum (Nash) Freckmann	Poaceae	Monocots	sensu Weakley 2012	U.S.A.	NC	Pender	in savanna immediately south of Flo Road, approximately 0.3km east of intersection of Flo Road and Fill Road	Wet Loamy Pine Savanna (sensu Schafale 2012)	frequent	8 m. msl	34deg.34'56.3" N	77deg.38'48.6" W	50	Robert Thornhill	1306	3	6	2012
NCSC	Dichanthelium longiligulatum (Nash) Freckmann	Poaceae	Monocots	sensu Weakley 2012	U.S.A.	NC	Pender	in savanna on east side of Alligator Lake Road, immediately south of junction with Flo Road	Very Wet Loamy Pine Savanna (sensu Schafale 2012)		8 m. msl	34deg.34'54.2" N	77deg.38'38.5" W	50	Robert Thornhill	250	15	5	2011
NCSC	Dichanthelium longiligulatum (Nash) Freckmann	Poaceae	Monocots	sensu Weakley 2012	U.S.A.	NC	Pender	in Spodosol savanna on east side of Half Moon Road, 0.5-1.5 km southwest of intersection of Half Moon Road and Flo Road	Sandy Pine Savanna (Typic subtype) sensu Schafale 2012	frequent	9 m. msl	34deg.35'15.7" N	77deg.40'16.0" W	500	Robert Thornhill	1220	28	10	2011
NCSC	Dichanthelium longiligulatum (Nash) Freckmann	Poaceae	Monocots	sensu Weakley 2012	U.S.A.	NC	Pender	in Spodosol savanna on east side of Half Moon Road, 0.5-1.5 km southwest of intersection of Half Moon Road and Flo Road	Sandy Pine Savanna (Typic subtype) sensu Schafale 2012	frequent	9 m. msl	34deg.35'15.7" N	77deg.40'16.0" W	500	Robert Thornhill	1220	28	10	2011
NCSC	Dichanthelium longiligulatum (Nash) Freckmann	Poaceae	Monocots	sensu Weakley 2012	U.S.A.	NC	Pender	in Spodosol savanna on east side of Half Moon Road, 0.5-1.5 km southwest of intersection of Half Moon Road and Flo Road	Sandy Pine Savanna (Typic subtype) sensu Schafale 2012	infrequent	9 m. msl	34deg.35'15.7" N	77deg.40'16.0" W	500	Robert Thornhill	1347	3	6	2012
NCSC	Dichanthelium longiligulatum (Nash) Freckmann	Poaceae	Monocots	sensu Weakley 2012	U.S.A.	NC	Pender	in savanna immediately south of Flo Road, approximately 0.3km east of intersection of Flo Road and Fill Road	Wet Loamy Pine Savanna (sensu Schafale 2012)	infrequent	8 m. msl	34deg.34'56.3" N	77deg.38'48.6" W	50	Robert Thornhill	1310	3	6	2012
NCSC	Dichanthelium mattamuskeetense (Ashe) Mohlenbr.	Poaceae	Monocots	sensu Weakley 2012	U.S.A.	NC	Pender	in powerline cut between Bug Ridge Road and Flo Road	Wet Loamy Pine Savanna (sensu Schafale 2012)	occasional	8 m. msl	34deg.34'56.3" N	77deg.38'48.6" W	50	Robert Thornhill	1506	3	8	2012
NCSC	Dichanthelium mattamuskeetense (Ashe) Mohlenbr.	Poaceae	Monocots	sensu Weakley 2012	U.S.A.	NC	Pender	in powerline cut between Bug Ridge Road and Flo Road	Wet Loamy Pine Savanna (sensu Schafale 2012)	occasional	8 m. msl	34deg.34'56.3" N	77deg.38'48.6" W	50	Robert Thornhill	1506	3	8	2012
NCSC	Dichanthelium mattamuskeetense (Ashe) Mohlenbr.	Poaceae	Monocots	sensu Weakley 2012	U.S.A.	NC	Pender	in Spodosol savanna on east side of Half Moon Road, 0.5-1.5 km southwest of intersection of Half Moon Road and Flo Road	Sandy Pine Savanna (Typic subtype) sensu Schafale 2012		9 m. msl	34deg.35'15.7" N	77deg.40'16.0" W	500	Robert Thornhill	257	15	5	2011		y
NCSC	Dichanthelium mattamuskeetense (Ashe) Mohlenbr.	Poaceae	Monocots	sensu Weakley 2012	U.S.A.	NC	Pender	in Spodosol savanna on east side of Half Moon Road, 0.5-1.5 km southwest of intersection of Half Moon Road and Flo Road	Sandy Pine Savanna (Typic subtype) sensu Schafale 2012		9 m. msl	34deg.35'15.7" N	77deg.40'16.0" W	500	Robert Thornhill	257	15	5	2011		y
NCSC	Dichanthelium mattamuskeetense (Ashe) Mohlenbr.	Poaceae	Monocots	sensu Weakley 2012	U.S.A.	NC	Pender	in Spodosol savanna on east side of Half Moon Road, 0.5-1.5 km southwest of intersection of Half Moon Road and Flo Road	Sandy Pine Savanna (Typic subtype) sensu Schafale 2012		9 m. msl	34deg.35'15.7" N	77deg.40'16.0" W	500	Robert Thornhill	257	15	5	2011		y
NCSC	Dichanthelium mattamuskeetense (Ashe) Mohlenbr.	Poaceae	Monocots	sensu Weakley 2012	U.S.A.	NC	Pender	in Spodosol savanna on east side of Half Moon Road, 0.5-1.5 km southwest of intersection of Half Moon Road and Flo Road	Sandy Pine Savanna (Typic subtype) sensu Schafale 2012	occasional	9 m. msl	34deg.35'15.7" N	77deg.40'16.0" W	500	Robert Thornhill	289	15	5	2011
NCSC	Dichanthelium mattamuskeetense (Ashe) Mohlenbr.	Poaceae	Monocots	sensu Weakley 2012	U.S.A.	NC	Pender	in large savanna immediately south of intersection of Flo Road and Fill Road	Wet Loamy Pine Savanna (sensu Schafale 2012)	infrequent	8 m. msl	34deg.34'54.7" N	77deg.39'9.0" W	100	Robert Thornhill	279	30	5	2011
NCSC	Dichanthelium mattamuskeetense (Ashe) Mohlenbr.	Poaceae	Monocots	sensu Weakley 2012	U.S.A.	NC	Pender	in dry ridge approximately .2 km north and then .1 km west from fork in Mule Pen Road (i.e., 2 km west of junction with Williams Road)	Mesic Pine Savanna (Coastal Plain subtype) sensu Schafale 2012	occasional	8 m. msl	34deg.35'41.0" N	77deg.42'25.8" W	50	Robert Thornhill	1313	3	6	2012			sandy ridge north of the fork in Mule Pen Road
NCSC	Dichanthelium ovale (Elliott) Gould & C.A. Clark var. ovale	Poaceae	Monocots	sensu Weakley 2012	U.S.A.	NC	Pender	in large savanna immediately south of intersection of Flo Road and Fill Road	Wet Loamy Pine Savanna (sensu Schafale 2012)	infrequent	8 m. msl	34deg.34'54.7" N	77deg.39'9.0" W	100	Robert Thornhill	1412	15	6	2012
NCSC	Dichanthelium scabriusculum (Elliott) Gould & C.A. Clark	Poaceae	Monocots	sensu Weakley 2012	U.S.A.	NC	Pender	in savanna immediately south of Flo Road, approximately 0.3km east of intersection of Flo Road and Fill Road	Wet Loamy Pine Savanna (sensu Schafale 2012)	occasional	8 m. msl	34deg.34'56.3" N	77deg.38'48.6" W	50	Robert Thornhill	618	14	7	2011
NCSC	Dichanthelium scabriusculum (Elliott) Gould & C.A. Clark	Poaceae	Monocots	sensu Weakley 2012	U.S.A.	NC	Pender	in savanna immediately south of Flo Road, approximately 0.3km east of intersection of Flo Road and Fill Road	Wet Loamy Pine Savanna (sensu Schafale 2012)	occasional	8 m. msl	34deg.34'56.3" N	77deg.38'48.6" W	50	Robert Thornhill	618	14	7	2011
NCSC	Dichanthelium scabriusculum (Elliott) Gould & C.A. Clark	Poaceae	Monocots	sensu Weakley 2012	U.S.A.	NC	Pender	in pine savanna on northeast corner of intersection of Flo Road and Fill Road	Very Wet Loamy Pine Savanna (sensu Schafale 2012)	occasional	8 m. msl	34deg.35'0.1" N	77deg.38'59.2" W	50	Robert Thornhill	407	31	5	2011
NCSC	Dichanthelium scabriusculum (Elliott) Gould & C.A. Clark	Poaceae	Monocots	sensu Weakley 2012	U.S.A.	NC	Pender	in pine savanna on northeast corner of intersection of Flo Road and Fill Road	Very Wet Loamy Pine Savanna (sensu Schafale 2012)	occasional	8 m. msl	34deg.35'0.1" N	77deg.38'59.2" W	50	Robert Thornhill	407	31	5	2011
NCSC	Dichanthelium scabriusculum (Elliott) Gould & C.A. Clark	Poaceae	Monocots	sensu Weakley 2012	U.S.A.	NC	Pender	in pine savanna on northeast corner of intersection of Flo Road and Fill Road	Very Wet Loamy Pine Savanna (sensu Schafale 2012)	occasional	8 m. msl	34deg.35'0.1" N	77deg.38'59.2" W	50	Robert Thornhill	1166	7	10	2011		y
NCSC	Dichanthelium scabriusculum (Elliott) Gould & C.A. Clark	Poaceae	Monocots	sensu Weakley 2012	U.S.A.	NC	Pender	in savanna on east side of Alligator Lake Road, immediately south of junction with Flo Road	Very Wet Loamy Pine Savanna (sensu Schafale 2012)	occasional	8 m. msl	34deg.34'54.2" N	77deg.38'38.5" W	50	Robert Thornhill	1168	7	10	2011
NCSC	Dichanthelium scabriusculum (Elliott) Gould & C.A. Clark	Poaceae	Monocots	sensu Weakley 2012	U.S.A.	NC	Pender	in large savanna immediately south of intersection of Flo Road and Fill Road	Wet Loamy Pine Savanna (sensu Schafale 2012)	occasional	8 m. msl	34deg.34'54.7" N	77deg.39'9.0" W	100	Robert Thornhill	1169	7	10	2011
NCSC	Dichanthelium scabriusculum (Elliott) Gould & C.A. Clark	Poaceae	Monocots	sensu Weakley 2012	U.S.A.	NC	Pender	in savanna immediately south of Flo Road, approximately 0.3km east of intersection of Flo Road and Fill Road	Wet Loamy Pine Savanna (sensu Schafale 2012)	occasional	8 m. msl	34deg.34'56.3" N	77deg.38'48.6" W	50	Robert Thornhill	688	21	7	2011
NCSC	Dichanthelium scabriusculum (Elliott) Gould & C.A. Clark	Poaceae	Monocots	sensu Weakley 2012	U.S.A.	NC	Pender	in savanna immediately south of Flo Road, approximately 0.3km east of intersection of Flo Road and Fill Road	Wet Loamy Pine Savanna (sensu Schafale 2012)	occasional	8 m. msl	34deg.34'56.3" N	77deg.38'48.6" W	50	Robert Thornhill	691	21	7	2011
NCSC	Dichanthelium scabriusculum (Elliott) Gould & C.A. Clark	Poaceae	Monocots	sensu Weakley 2012	U.S.A.	NC	Pender	in savanna immediately south of Flo Road, approximately 0.3km east of intersection of Flo Road and Fill Road	Wet Loamy Pine Savanna (sensu Schafale 2012)	occasional	8 m. msl	34deg.34'56.3" N	77deg.38'48.6" W	50	Robert Thornhill	691	21	7	2011
NCSC	Dichanthelium scabriusculum (Elliott) Gould & C.A. Clark	Poaceae	Monocots	sensu Weakley 2012	U.S.A.	NC	Pender	in savanna immediately south of Flo Road, approximately 0.3km east of intersection of Flo Road and Fill Road	Wet Loamy Pine Savanna (sensu Schafale 2012)	occasional (patch dominant)	8 m. msl	34deg.34'56.3" N	77deg.38'48.6" W	50	Robert Thornhill	1167	7	10	2011
NCSC	Dichanthelium scoparium (Lam.) Gould	Poaceae	Monocots	sensu Weakley 2012	U.S.A.	NC	Pender	along Flo Road, 0.4-1.2 km southeast of junction with Half Moon Road	sandy roadside margin, adjacent to pine savanna	occasional	9 m. msl	34deg.35'11.9" N	77deg.39'45.9" W	400	Robert Thornhill	643	14	7	2011		y
NCSC	Dichanthelium scoparium (Lam.) Gould	Poaceae	Monocots	sensu Weakley 2012	U.S.A.	NC	Pender	along Flo Road, circa 0.3 km east of intersection with Fill Road	sandy roadside margin, adjacent to pine savanna	occasional	8 m. msl	34deg.34'58.0" N	77deg.38'48.2" W	50	Robert Thornhill	571	28	6	2011		y
NCSC	Dichanthelium scoparium (Lam.) Gould	Poaceae	Monocots	sensu Weakley 2012	U.S.A.	NC	Pender	in savanna immediately south of Flo Road, approximately 0.3km east of intersection of Flo Road and Fill Road	Wet Loamy Pine Savanna (sensu Schafale 2012)	occasional	8 m. msl	34deg.34'56.3" N	77deg.38'48.6" W	50	Robert Thornhill	791	3	8	2011		y
NCSC	Dichanthelium species 3 (= lancearium)	Poaceae	Monocots	sensu Weakley 2012	U.S.A.	NC	Pender	spodosol ridge approximately 0.4 km west of Flo Road at a point 0.6 km northwest of intersection of Flo Road and Williams Road	Wet Pine Flatwoods (Typic subtype ) sensu Schafale 2012	occasional	9 m. msl	34deg.36'10.5" N	77deg.40'42.3" W	100	Robert Thornhill	1298	22	5	2012
NCSC	Dichanthelium species 3 (= lancearium)	Poaceae	Monocots	sensu Weakley 2012	U.S.A.	NC	Pender	in grown-over flatwoods 50 meters south of Mule Pen Road, approximately 2.4 km west of junction with Williams Road	Wet Pine Flatwoods (Typic subtype ) sensu Schafale 2012	occasional	7 m. msl	34deg.35'21.2" N	77deg.42'33.5" W	50	Robert Thornhill	1325	3	6	2012			just south of Mule Pen Road, approximately 1.5 miles past intersection of Mule Pen Road and Williams Road
NCSC	Dichanthelium species 3 (= lancearium)	Poaceae	Monocots	sensu Weakley 2012	U.S.A.	NC	Pender	in ridge approximately .2 km north and then .1 km west from fork in Mule Pen Road (i.e., 2 km west of junction with Williams Road)	Wet Pine Flatwoods (Typic subtype ) sensu Schafale 2012	infrequent	8 m. msl	34deg.35'41.0" N	77deg.42'25.8" W	50	Robert Thornhill	1315	3	6	2012			sandy ridge north of the fork in Mule Pen Road
NCSC	Dichanthelium sphaerocarpon (Elliott) Gould	Poaceae	Monocots	sensu Weakley 2012	U.S.A.	NC	Pender	in pine savanna on northeast corner of intersection of Flo Road and Fill Road	Very Wet Loamy Pine Savanna (sensu Schafale 2012)	infrequent	8 m. msl	34deg.35'0.1" N	77deg.38'59.2" W	50	Robert Thornhill	773	3	8	2011		y
NCSC	Dichanthelium sphaerocarpon (Elliott) Gould	Poaceae	Monocots	sensu Weakley 2012	U.S.A.	NC	Pender	near hunting lodge on Williams Road, just south of Shelter Swamp Creek	moist lawn	infrequent	8 m. msl	34deg.35'57.5" N	77deg.39'58.8" W	5	Robert Thornhill	1416	19	6	2012			near hunting lodge on Williams Road, just south of Shelter Swamp Creek
NCSC	Dichanthelium strigosum (Muhl. ex Elliott) Freckmann var. strigosum	Poaceae	Monocots	sensu Weakley 2012	U.S.A.	NC	Pender	in pine savanna on northeast corner of intersection of Flo Road and Fill Road	Very Wet Loamy Pine Savanna (sensu Schafale 2012)	occasional	8 m. msl	34deg.35'0.1" N	77deg.38'59.2" W	50	Robert Thornhill	1414
NCSC	Dichanthelium tenue (Muhl.) Freckmann & Lelong	Poaceae	Monocots	sensu Weakley 2012	U.S.A.	NC	Pender	in grown-over flatwoods 50 meters south of Mule Pen Road, approximately 2.4 km west of junction with Williams Road	Wet Pine Flatwoods (Typic subtype ) sensu Schafale 2012	occasional	7 m. msl	34deg.35'21.2" N	77deg.42'33.5" W	50	Robert Thornhill	1326	3	6	2012
NCSC	Dichanthelium tenue (Muhl.) Freckmann & Lelong	Poaceae	Monocots	sensu Weakley 2012	U.S.A.	NC	Pender	in savanna on east side of Alligator Lake Road, immediately south of junction with Flo Road	Very Wet Loamy Pine Savanna (sensu Schafale 2012)		8 m. msl	34deg.34'54.2" N	77deg.38'38.5" W	50	Robert Thornhill	1307	3	6	2012
NCSC	Dichanthelium tenue (Muhl.) Freckmann & Lelong	Poaceae	Monocots	sensu Weakley 2012	U.S.A.	NC	Pender	in pine savannas along Flo Road, approximately 0.4-1.2 km southeast of junction with Half Moon Road	Sandy Pine Savanna (Rush Featherling subtype) sensu Schafale 2012		9 m. msl	34deg.35'11.9" N	77deg.39'45.9" W	400	Robert Thornhill	1415	19	6	2012
NCSC	Dichanthelium tenue (Muhl.) Freckmann & Lelong	Poaceae	Monocots	sensu Weakley 2012	U.S.A.	NC	Pender	in pine savannas along Flo Road, approximately 0.4-1.2 km southeast of junction with Half Moon Road	Sandy Pine Savanna (Rush Featherling subtype) sensu Schafale 2012	occasional	9 m. msl	34deg.35'11.9" N	77deg.39'45.9" W	400	Robert Thornhill	301	15	5	2011
NCSC	Dichanthelium tenue (Muhl.) Freckmann & Lelong	Poaceae	Monocots	sensu Weakley 2012	U.S.A.	NC	Pender	in large savanna immediately south of intersection of Flo Road and Fill Road	Wet Loamy Pine Savanna (sensu Schafale 2012)	occasional	8 m. msl	34deg.34'54.7" N	77deg.39'9.0" W	100	Robert Thornhill	1411	15	6	2012
NCSC	Dichanthelium villosissimum (Nash) Freckmann var. villosissimum	Poaceae	Monocots	sensu Weakley 2012	U.S.A.	NC	Pender	in ridge approximately .2 km north and then .1 km west from fork in Mule Pen Road (i.e., 2 km west of junction with Williams Road)	Wet Pine Flatwoods (Typic subtype ) sensu Schafale 2012	infrequent	8 m. msl	34deg.35'41.0" N	77deg.42'25.8" W	50	Robert Thornhill	1324	3	6	2012			sandy ridge north of the fork in Mule Pen Road
NCSC	Dichanthelium webberianum (Nash) LeBlond	Poaceae	Monocots	sensu Weakley 2012	U.S.A.	NC	Pender	in ridge approximately .2 km north and then .1 km west from fork in Mule Pen Road (i.e., 2 km west of junction with Williams Road)	Wet Pine Flatwoods (Typic subtype ) sensu Schafale 2012	occasional	8 m. msl	34deg.35'41.0" N	77deg.42'25.8" W	50	Robert Thornhill	1316	3	6	2012
NCSC	Dichanthelium webberianum (Nash) LeBlond	Poaceae	Monocots	sensu Weakley 2012	U.S.A.	NC	Pender	in pine savannas along Flo Road, approximately 0.4-1.2 km southeast of junction with Half Moon Road	Sandy Pine Savanna (Rush Featherling subtype) sensu Schafale 2012	occasional	9 m. msl	34deg.35'11.9" N	77deg.39'45.9" W	400	Robert Thornhill	961	26	8	2011
NCSC	Dichanthelium webberianum (Nash) LeBlond	Poaceae	Monocots	sensu Weakley 2012	U.S.A.	NC	Pender	in ridge approximately .2 km north and then .1 km west from fork in Mule Pen Road (i.e., 2 km west of junction with Williams Road)	Wet Pine Flatwoods (Typic subtype ) sensu Schafale 2012	occasional	8 m. msl	34deg.35'41.0" N	77deg.42'25.8" W	50	Robert Thornhill	1314	3	6	2012			sandy ridge north of the fork in Mule Pen Road
NCSC	Digitaria sanguinalis (L.) Scop.	Poaceae	Monocots	sensu Weakley 2012	U.S.A.	NC	Pender	in food plot northwest of intersection of Alligator Lake Road and Flo Road	weedy open area (food plot)	frequent	8 m. msl	34deg.34'59.0" N	77deg.38'46.7" W	100	Robert Thornhill	1459	26	7	2012			in food plot north of Alligator Lake Road
NCSC	Elymus glabriflorus (Vasey ex L.H. Dewey) Scribn. & C.R. Ball	Poaceae	Monocots	sensu Weakley 2012	U.S.A.	NC	Pender	around dog pens on Williams Road, approximately .25 km southwest of hunting lodge	weedy roadside	infrequent	8 m. msl	34deg.35'52.9" N	77deg.40'7.3" W	20	Robert Thornhill	1368	11	6	2012			around dog pens on Williams Road, just south of lodge
NCSC	Elymus glabriflorus (Vasey ex L.H. Dewey) Scribn. & C.R. Ball	Poaceae	Monocots	sensu Weakley 2012	U.S.A.	NC	Pender	around dog pens on Williams Road, approximately .25 km southwest of hunting lodge	weedy roadside	infrequent	8 m. msl	34deg.35'52.9" N	77deg.40'7.3" W	20	Robert Thornhill	1427	11	7	2012			around dog pens on Williams Road
NCSC	Elymus glabriflorus (Vasey ex L.H. Dewey) Scribn. & C.R. Ball	Poaceae	Monocots	sensu Weakley 2012	U.S.A.	NC	Pender	around dog pens on Williams Road, approximately .25 km southwest of hunting lodge	weedy roadside	infrequent	8 m. msl	34deg.35'52.9" N	77deg.40'7.3" W	20	Robert Thornhill	1428	11	7	2012			around dog pens on Williams Road
NCSC	Eragrostis elliottii S. Watson	Poaceae	Monocots	sensu Weakley 2012	U.S.A.	NC	Pender	in savanna on east side of Alligator Lake Road, immediately south of junction with Flo Road	Very Wet Loamy Pine Savanna (sensu Schafale 2012)	occasional	8 m. msl	34deg.34'54.2" N	77deg.38'38.5" W	50	Robert Thornhill	1093	16	9	2011		y
NCSC	Eragrostis elliottii S. Watson	Poaceae	Monocots	sensu Weakley 2012	U.S.A.	NC	Pender	in savanna on east side of Alligator Lake Road, immediately south of junction with Flo Road	Very Wet Loamy Pine Savanna (sensu Schafale 2012)	occasional	8 m. msl	34deg.34'54.2" N	77deg.38'38.5" W	50	Robert Thornhill	1093	16	9	2011		y
NCSC	Eragrostis elliottii S. Watson	Poaceae	Monocots	sensu Weakley 2012	U.S.A.	NC	Pender	in savanna on east side of Alligator Lake Road, immediately south of junction with Flo Road	Very Wet Loamy Pine Savanna (sensu Schafale 2012)	occasional	8 m. msl	34deg.34'54.2" N	77deg.38'38.5" W	50	Robert Thornhill	1190	23	10	2011
NCSC	Eragrostis elliottii S. Watson	Poaceae	Monocots	sensu Weakley 2012	U.S.A.	NC	Pender	in savanna on east side of Alligator Lake Road, immediately south of junction with Flo Road	Very Wet Loamy Pine Savanna (sensu Schafale 2012)	occasional	8 m. msl	34deg.34'54.2" N	77deg.38'38.5" W	50	Robert Thornhill	1190	23	10	2011
NCSC	Eragrostis refracta (Muhl. ex Elliott) Scribn.	Poaceae	Monocots	sensu Weakley 2012	U.S.A.	NC	Pender	in pine savannas along Flo Road, approximately 0.4-1.2 km southeast of junction with Half Moon Road	Sandy Pine Savanna (Rush Featherling subtype) sensu Schafale 2012	occasional	9 m. msl	34deg.35'11.9" N	77deg.39'45.9" W	400	Robert Thornhill	815	4	8	2011
NCSC	Eragrostis refracta (Muhl. ex Elliott) Scribn.	Poaceae	Monocots	sensu Weakley 2012	U.S.A.	NC	Pender	in savanna on east side of Alligator Lake Road, immediately south of junction with Flo Road	Very Wet Loamy Pine Savanna (sensu Schafale 2012)	occasional	8 m. msl	34deg.34'54.2" N	77deg.38'38.5" W	50	Robert Thornhill	862	12	8	2011
NCSC	Eragrostis refracta (Muhl. ex Elliott) Scribn.	Poaceae	Monocots	sensu Weakley 2012	U.S.A.	NC	Pender	in Spodosol savanna on east side of Half Moon Road, 0.5-1.5 km southwest of intersection of Half Moon Road and Flo Road	Sandy Pine Savanna (Typic subtype) sensu Schafale 2012		9 m. msl	34deg.35'15.7" N	77deg.40'16.0" W	500	Robert Thornhill	22	21	8	2010
NCSC	Eragrostis refracta (Muhl. ex Elliott) Scribn.	Poaceae	Monocots	sensu Weakley 2012	U.S.A.	NC	Pender	in Spodosol savanna on east side of Half Moon Road, 0.5-1.5 km southwest of intersection of Half Moon Road and Flo Road	Sandy Pine Savanna (Typic subtype) sensu Schafale 2012	occasional	9 m. msl	34deg.35'15.7" N	77deg.40'16.0" W	500	Robert Thornhill	816	4	8	2011
NCSC	Eremochloa ophiuroides (Munro) Hack	Poaceae	Monocots	sensu Weakley 2012	U.S.A.	NC	Pender	near hunting lodge on Williams Road, just south of Shelter Swamp Creek	moist lawn	frequent	8 m. msl	34deg.35'57.5" N	77deg.39'58.8" W	5	Robert Thornhill	1500	3	8	2012			around hunting lodge on Williams Road, just south of Shelter Swamp Creek
NCSC	Gymnopogon brevifolius Trin.	Poaceae	Monocots	sensu Weakley 2012	U.S.A.	NC	Pender	in pine savanna on northeast corner of intersection of Flo Road and Fill Road	Very Wet Loamy Pine Savanna (sensu Schafale 2012)	occasional (in drier sites)	8 m. msl	34deg.35'0.1" N	77deg.38'59.2" W	50	Robert Thornhill	1156	7	10	2011
NCSC	Gymnopogon brevifolius Trin.	Poaceae	Monocots	sensu Weakley 2012	U.S.A.	NC	Pender	in savanna on east side of Alligator Lake Road, immediately south of junction with Flo Road	Very Wet Loamy Pine Savanna (sensu Schafale 2012)	occasional	8 m. msl	34deg.34'54.2" N	77deg.38'38.5" W	50	Robert Thornhill	1071	16	9	2011		y
NCSC	Gymnopogon brevifolius Trin.	Poaceae	Monocots	sensu Weakley 2012	U.S.A.	NC	Pender	in savanna on east side of Alligator Lake Road, immediately south of junction with Flo Road	Very Wet Loamy Pine Savanna (sensu Schafale 2012)	occasional	8 m. msl	34deg.34'54.2" N	77deg.38'38.5" W	50	Robert Thornhill	1071	16	9	2011		y
NCSC	Gymnopogon brevifolius Trin.	Poaceae	Monocots	sensu Weakley 2012	U.S.A.	NC	Pender	in large savanna immediately south of intersection of Flo Road and Fill Road	Wet Loamy Pine Savanna (sensu Schafale 2012)	occasional	8 m. msl	34deg.34'54.7" N	77deg.39'9.0" W	100	Robert Thornhill	1056	9	9	2011
NCSC	Gymnopogon brevifolius Trin.	Poaceae	Monocots	sensu Weakley 2012	U.S.A.	NC	Pender	in large savanna immediately south of intersection of Flo Road and Fill Road	Wet Loamy Pine Savanna (sensu Schafale 2012)	occasional	8 m. msl	34deg.34'54.7" N	77deg.39'9.0" W	100	Robert Thornhill	1056	9	9	2011
NCSC	Gymnopogon brevifolius Trin.	Poaceae	Monocots	sensu Weakley 2012	U.S.A.	NC	Pender	in savanna immediately south of Flo Road, approximately 0.3km east of intersection of Flo Road and Fill Road	Wet Loamy Pine Savanna (sensu Schafale 2012)	occasional (in drier sites)	8 m. msl	34deg.34'56.3" N	77deg.38'48.6" W	50	Robert Thornhill	1153	7	10	2011
NCSC	Lolium perenne L. var. aristatum Willd.	Poaceae	Monocots	sensu Weakley 2012	U.S.A.	NC	Pender	in food plot northwest of intersection of Alligator Lake Road and Flo Road	weedy open area (food plot)	occasional	8 m. msl	34deg.34'59.0" N	77deg.38'46.7" W	100	Robert Thornhill	1282	2	5	2012			food plot north of intersection of Flo Road and Alligator Lake Road
NCSC	Muhlenbergia capillaris (Lam.) Trin.	Poaceae	Monocots	sensu Weakley 2012	U.S.A.	NC	Pender	in savanna on east side of Alligator Lake Road, immediately south of junction with Flo Road	Very Wet Loamy Pine Savanna (sensu Schafale 2012)	rare	8 m. msl	34deg.34'54.2" N	77deg.38'38.5" W	50	Robert Thornhill	1114	16	9	2011		y
NCSC	Muhlenbergia capillaris (Lam.) Trin.	Poaceae	Monocots	sensu Weakley 2012	U.S.A.	NC	Pender	in savanna on east side of Alligator Lake Road, immediately south of junction with Flo Road	Very Wet Loamy Pine Savanna (sensu Schafale 2012)	rare	8 m. msl	34deg.34'54.2" N	77deg.38'38.5" W	50	Robert Thornhill	1114	16	9	2011		y
NCSC	Muhlenbergia capillaris (Lam.) Trin.	Poaceae	Monocots	sensu Weakley 2012	U.S.A.	NC	Pender	in savanna on east side of Alligator Lake Road, immediately south of junction with Flo Road	Very Wet Loamy Pine Savanna (sensu Schafale 2012)	rare	8 m. msl	34deg.34'54.2" N	77deg.38'38.5" W	50	Robert Thornhill	1199	23	10	2011
NCSC	Muhlenbergia expansa (Poir.) Trin.	Poaceae	Monocots	sensu Weakley 2012	U.S.A.	NC	Pender	in pine savanna on northeast corner of intersection of Flo Road and Fill Road	Very Wet Loamy Pine Savanna (sensu Schafale 2012)		8 m. msl	34deg.35'0.1" N	77deg.38'59.2" W	50	Robert Thornhill	771	3	8	2011
NCSC	Muhlenbergia expansa (Poir.) Trin.	Poaceae	Monocots	sensu Weakley 2012	U.S.A.	NC	Pender	in small pine savanna on south side of Flo Road, approximately .1 km west of junction with Alligator Lake Road	Very Wet Loamy Pine Savanna (sensu Schafale 2012)		9 m. msl	34deg.34'58.0" N	77deg.38'41.0" W	20	Robert Thornhill	864	12	8	2011
NCSC	Muhlenbergia expansa (Poir.) Trin.	Poaceae	Monocots	sensu Weakley 2012	U.S.A.	NC	Pender	in pine savannas along Flo Road, approximately 0.4-1.2 km southeast of junction with Half Moon Road	Sandy Pine Savanna (Rush Featherling subtype) sensu Schafale 2012	frequent	9 m. msl	34deg.35'11.9" N	77deg.39'45.9" W	400	Robert Thornhill	1015	2	9	2011
NCSC	Muhlenbergia expansa (Poir.) Trin.	Poaceae	Monocots	sensu Weakley 2012	U.S.A.	NC	Pender	in savanna .18 km south of Flo Road at a point approximately 0.3km east of intersection of Flo Road and Fill Road	Very Wet Loamy Pine Savanna (sensu Schafale 2012)		8 m. msl	34deg.34'50.5" N	77deg.38'46.6" W	50	Robert Thornhill	1016	2	9	2011		y
NCSC	Muhlenbergia expansa (Poir.) Trin.	Poaceae	Monocots	sensu Weakley 2012	U.S.A.	NC	Pender	in savanna on east side of Alligator Lake Road, immediately south of junction with Flo Road	Very Wet Loamy Pine Savanna (sensu Schafale 2012)	abundant	8 m. msl	34deg.34'54.2" N	77deg.38'38.5" W	50	Robert Thornhill	1012	2	9	2011
NCSC	Muhlenbergia expansa (Poir.) Trin.	Poaceae	Monocots	sensu Weakley 2012	U.S.A.	NC	Pender	in large savanna immediately south of intersection of Flo Road and Fill Road	Wet Loamy Pine Savanna (sensu Schafale 2012)	abundant	8 m. msl	34deg.34'54.7" N	77deg.39'9.0" W	100	Robert Thornhill	1014	2	9	2011
NCSC	Muhlenbergia expansa (Poir.) Trin.	Poaceae	Monocots	sensu Weakley 2012	U.S.A.	NC	Pender	in savanna immediately south of Flo Road, approximately 0.3km east of intersection of Flo Road and Fill Road	Wet Loamy Pine Savanna (sensu Schafale 2012)	abundant	8 m. msl	34deg.34'56.3" N	77deg.38'48.6" W	50	Robert Thornhill	1013	2	9	2011
NCSC	Muhlenbergia torreyana (Schult.) Hitchc.	Poaceae	Monocots	sensu Weakley 2012	U.S.A.	NC	Pender		Wet Loamy Pine Savanna (sensu Schafale 2012)	rare				100	Robert Thornhill	1053	9	9	2011
NCSC	Muhlenbergia torreyana (Schult.) Hitchc.	Poaceae	Monocots	sensu Weakley 2012	U.S.A.	NC	Pender		Wet Loamy Pine Savanna (sensu Schafale 2012)	rare				100	Robert Thornhill	1053	9	9	2011
NCSC	Panicum dichotomiflorum Michx. var. puritanorum Svenson	Poaceae	Monocots	sensu Weakley 2012	U.S.A.	NC	Pender		Sandy Pine Savanna (Typic subtype) sensu Schafale 2012	rare				500	Robert Thornhill	935	19	8	2011		y
NCSC	Panicum verrucosum Muhl.	Poaceae	Monocots	sensu Weakley 2012	U.S.A.	NC	Pender	in pine savannas along Flo Road, approximately 0.4-1.2 km southeast of junction with Half Moon Road	Sandy Pine Savanna (Rush Featherling subtype) sensu Schafale 2012	frequent	9 m. msl	34deg.35'11.9" N	77deg.39'45.9" W	400	Robert Thornhill	1062	9	9	2011
NCSC	Panicum verrucosum Muhl.	Poaceae	Monocots	sensu Weakley 2012	U.S.A.	NC	Pender	in savanna on east side of Alligator Lake Road, immediately south of junction with Flo Road	Very Wet Loamy Pine Savanna (sensu Schafale 2012)	occasional	8 m. msl	34deg.34'54.2" N	77deg.38'38.5" W	50	Robert Thornhill	1109	16	9	2011
NCSC	Panicum verrucosum Muhl.	Poaceae	Monocots	sensu Weakley 2012	U.S.A.	NC	Pender	in savanna on east side of Alligator Lake Road, immediately south of junction with Flo Road	Very Wet Loamy Pine Savanna (sensu Schafale 2012)	occasional	8 m. msl	34deg.34'54.2" N	77deg.38'38.5" W	50	Robert Thornhill	1124	25	9	2011
NCSC	Panicum virgatum L.	Poaceae	Monocots	sensu FNA	U.S.A.	NC	Pender	in small pine savanna on south side of Flo Road, approximately .1 km west of junction with Alligator Lake Road	Very Wet Loamy Pine Savanna (sensu Schafale 2012)	frequent	9 m. msl	34deg.34'58.0" N	77deg.38'41.0" W	20	Robert Thornhill	866	12	8	2011		y
NCSC	Panicum virgatum L.	Poaceae	Monocots	sensu FNA	U.S.A.	NC	Pender	in savanna on east side of Alligator Lake Road, immediately south of junction with Flo Road	Very Wet Loamy Pine Savanna (sensu Schafale 2012)	occasional	8 m. msl	34deg.34'54.2" N	77deg.38'38.5" W	50	Robert Thornhill	869	12	8	2011
NCSC	Panicum virgatum L.	Poaceae	Monocots	sensu FNA	U.S.A.	NC	Pender	in large savanna immediately south of intersection of Flo Road and Fill Road	Wet Loamy Pine Savanna (sensu Schafale 2012)	frequent	8 m. msl	34deg.34'54.7" N	77deg.39'9.0" W	100	Robert Thornhill	789	3	8	2011
NCSC	Panicum virgatum L.	Poaceae	Monocots	sensu FNA	U.S.A.	NC	Pender	in large savanna immediately south of intersection of Flo Road and Fill Road	Wet Loamy Pine Savanna (sensu Schafale 2012)	frequent	8 m. msl	34deg.34'54.7" N	77deg.39'9.0" W	100	Robert Thornhill	790	3	8	2011		y
NCSC	Paspalum dilatatum Poiret ssp. dilatatum	Poaceae	Monocots	sensu Weakley 2012	U.S.A.	NC	Pender	along Flo Road at junction with powerline cut	sandy roadside	occasional	8 m. msl	34deg.35'46.6" N	77deg.40'10.2" W	5	Robert Thornhill	1434	11	7	2012			south side of Flo Road at juncture with powerline cut
NCSC	Paspalum laeve Michx. var. laeve	Poaceae	Monocots	sensu Weakley 2012	U.S.A.	NC	Pender	along Flo Road, 0.4-1.2 km southeast of junction with Half Moon Road	sandy roadside margin, adjacent to pine savanna		9 m. msl	34deg.35'11.9" N	77deg.39'45.9" W	400	Robert Thornhill	644	14	7	2011		y
NCSC	Paspalum notatum Alain ex Flüggé	Poaceae	Monocots	sensu Weakley 2012	U.S.A.	NC	Pender	disturbed open area in powerline right-of-way, immediately east of hunting lodge on Williams Road	disturbed open area in powerline right-of-way	occasional	7 m. msl	34deg.35'56.8" N	77deg.39'56.5" W	10	Robert Thornhill	1376	11	6	2012			in powerline cut just east of hunting lodge
NCSC	Paspalum praecox Walter var. curtisianum (Steud.) Vasey	Poaceae	Monocots	sensu Weakley 2012	U.S.A.	NC	Pender	in pine savanna on northeast corner of intersection of Flo Road and Fill Road	Very Wet Loamy Pine Savanna (sensu Schafale 2012)	occasional	8 m. msl	34deg.35'0.1" N	77deg.38'59.2" W	50	Robert Thornhill	1163	7	10	2011
NCSC	Paspalum praecox Walter var. curtisianum (Steud.) Vasey	Poaceae	Monocots	sensu Weakley 2012	U.S.A.	NC	Pender	in savanna .18 km south of Flo Road at a point approximately 0.3km east of intersection of Flo Road and Fill Road	Very Wet Loamy Pine Savanna (sensu Schafale 2012)	occasional	8 m. msl	34deg.34'50.5" N	77deg.38'46.6" W	50	Robert Thornhill	434	9	6	2011
NCSC	Paspalum praecox Walter var. curtisianum (Steud.) Vasey	Poaceae	Monocots	sensu Weakley 2012	U.S.A.	NC	Pender	in savanna on east side of Alligator Lake Road, immediately south of junction with Flo Road	Very Wet Loamy Pine Savanna (sensu Schafale 2012)		8 m. msl	34deg.34'54.2" N	77deg.38'38.5" W	50	Robert Thornhill	403	31	5	2011
NCSC	Paspalum praecox Walter var. curtisianum (Steud.) Vasey	Poaceae	Monocots	sensu Weakley 2012	U.S.A.	NC	Pender	in savanna on east side of Alligator Lake Road, immediately south of junction with Flo Road	Very Wet Loamy Pine Savanna (sensu Schafale 2012)	occasional	8 m. msl	34deg.34'54.2" N	77deg.38'38.5" W	50	Robert Thornhill	1088	16	9	2011
NCSC	Paspalum praecox Walter var. curtisianum (Steud.) Vasey	Poaceae	Monocots	sensu Weakley 2012	U.S.A.	NC	Pender	in savanna on east side of Alligator Lake Road, immediately south of junction with Flo Road	Very Wet Loamy Pine Savanna (sensu Schafale 2012)	occasional	8 m. msl	34deg.34'54.2" N	77deg.38'38.5" W	50	Robert Thornhill	1099	16	9	2011		y
NCSC	Paspalum praecox Walter var. curtisianum (Steud.) Vasey	Poaceae	Monocots	sensu Weakley 2012	U.S.A.	NC	Pender	in savanna on east side of Alligator Lake Road, immediately south of junction with Flo Road	Very Wet Loamy Pine Savanna (sensu Schafale 2012)		8 m. msl	34deg.34'54.2" N	77deg.38'38.5" W	50	Robert Thornhill	577	28	6	2011
NCSC	Paspalum praecox Walter var. curtisianum (Steud.) Vasey	Poaceae	Monocots	sensu Weakley 2012	U.S.A.	NC	Pender	in large savanna immediately south of intersection of Flo Road and Fill Road	Wet Loamy Pine Savanna (sensu Schafale 2012)	occasional	8 m. msl	34deg.34'54.7" N	77deg.39'9.0" W	100	Robert Thornhill	450	9	6	2011		y
NCSC	Paspalum praecox Walter var. curtisianum (Steud.) Vasey	Poaceae	Monocots	sensu Weakley 2012	U.S.A.	NC	Pender	in large savanna immediately south of intersection of Flo Road and Fill Road	Wet Loamy Pine Savanna (sensu Schafale 2012)	occasional	8 m. msl	34deg.34'54.7" N	77deg.39'9.0" W	100	Robert Thornhill	450	9	6	2011		y
NCSC	Paspalum praecox Walter var. curtisianum (Steud.) Vasey	Poaceae	Monocots	sensu Weakley 2012	U.S.A.	NC	Pender	in large savanna immediately south of intersection of Flo Road and Fill Road	Wet Loamy Pine Savanna (sensu Schafale 2012)	occasional	8 m. msl	34deg.34'54.7" N	77deg.39'9.0" W	100	Robert Thornhill	1055	9	9	2011
NCSC	Paspalum praecox Walter var. curtisianum (Steud.) Vasey	Poaceae	Monocots	sensu Weakley 2012	U.S.A.	NC	Pender	in savanna immediately south of Flo Road, approximately 0.3km east of intersection of Flo Road and Fill Road	Wet Loamy Pine Savanna (sensu Schafale 2012)		8 m. msl	34deg.34'56.3" N	77deg.38'48.6" W	50	Robert Thornhill	572	28	6	2011
NCSC	Paspalum praecox Walter var. praecox	Poaceae	Monocots	sensu Weakley 2012	U.S.A.	NC	Pender	in savanna on east side of Alligator Lake Road, immediately south of junction with Flo Road	Very Wet Loamy Pine Savanna (sensu Schafale 2012)	infrequent	8 m. msl	34deg.34'54.2" N	77deg.38'38.5" W	50	Robert Thornhill	734	21	7	2011
NCSC	Paspalum setaceum Michx. var. muhlenbergii (Nash) D.J. Banks	Poaceae	Monocots	sensu Weakley 2012	U.S.A.	NC	Pender	along Flo Road, 0.4-1.2 km southeast of junction with Half Moon Road	sandy roadside margin, adjacent to pine savanna	occasional	9 m. msl	34deg.35'11.9" N	77deg.39'45.9" W	400	Robert Thornhill	646	14	7	2011
NCSC	Paspalum setaceum Michx. var. muhlenbergii (Nash) D.J. Banks	Poaceae	Monocots	sensu Weakley 2012	U.S.A.	NC	Pender	in savanna on east side of Alligator Lake Road, immediately south of junction with Flo Road	Very Wet Loamy Pine Savanna (sensu Schafale 2012)	occasiona?	8 m. msl	34deg.34'54.2" N	77deg.38'38.5" W	50	Robert Thornhill	1077	16	9	2011		y
NCSC	Paspalum setaceum Michx. var. muhlenbergii (Nash) D.J. Banks	Poaceae	Monocots	sensu Weakley 2012	U.S.A.	NC	Pender	in savanna on east side of Alligator Lake Road, immediately south of junction with Flo Road	Very Wet Loamy Pine Savanna (sensu Schafale 2012)	occasiona?	8 m. msl	34deg.34'54.2" N	77deg.38'38.5" W	50	Robert Thornhill	1077	16	9	2011		y
NCSC	Paspalum setaceum Michx. var. setaceum	Poaceae	Monocots	sensu Weakley 2012	U.S.A.	NC	Pender	in savanna on east side of Alligator Lake Road, immediately south of junction with Flo Road	Very Wet Loamy Pine Savanna (sensu Schafale 2012)		8 m. msl	34deg.34'54.2" N	77deg.38'38.5" W	50	Robert Thornhill	549	28	6	2011
NCSC	Paspalum setaceum Michx. var. setaceum	Poaceae	Monocots	sensu Weakley 2012	U.S.A.	NC	Pender	along eastern edge of powerline cut, approximately .2 mi south of junction with Indian Grave Road	Mesic Pine Savanna (Coastal Plain subtype) sensu Schafale 2012	occasional	9 m. msl	34deg.35'1.4" N	77deg.41'10.41" W	50	Robert Thornhill	1531	28	8	2012			at edge of powerline cut and mesic pine flatwoods, approximately .2 mi south of where Indian Grave Road crosses the powerline cut
NCSC	Paspalum urvillei Steud.	Poaceae	Monocots	sensu Weakley 2012	U.S.A.	NC	Pender	along Flo Road at intersection with Alligator Lake Road	weedy roadside	occasional	8 m. msl	34deg.34'54.2" N	77deg.38'38.5" W	50	Robert Thornhill	859	12	8	2011		y
NCSC	Paspalum urvillei Steud.	Poaceae	Monocots	sensu Weakley 2012	U.S.A.	NC	Pender	in savanna .18 km south of Flo Road at a point approximately 0.3km east of intersection of Flo Road and Fill Road	Very Wet Loamy Pine Savanna (sensu Schafale 2012)	rare	8 m. msl	34deg.34'50.5" N	77deg.38'46.6" W	50	Robert Thornhill	1025	2	9	2011
NCSC	Paspalum urvillei Steud.	Poaceae	Monocots	sensu Weakley 2012	U.S.A.	NC	Pender	around dog pens on Williams Road, approximately .25 km southwest of hunting lodge	weedy roadside	occasional	8 m. msl	34deg.35'52.9" N	77deg.40'7.3" W	20	Robert Thornhill	1338	3	6	2012			around dog pens on Williams Road
NCSC	Poa annua L.	Poaceae	Monocots	sensu Weakley 2012	U.S.A.	NC	Pender	south side of Flo Road, immediately across from intersection with Fill Road	sandy roadside	occasional	9 m. msl	34deg.34'56.9" N	77deg.39'2.7" W	5	Robert Thornhill	251	26	3	2012			south side of Flo Road, immediately across from intersection with Fill Road
NCSC	Poa autumnalis Muhl. ex Elliott	Poaceae	Monocots	sensu Weakley 2012	U.S.A.	NC	Pender	around dog pens on Williams Road, approximately .25 km southwest of hunting lodge	weedy roadside	infrequent	8 m. msl	34deg.35'52.9" N	77deg.40'7.3" W	20	Robert Thornhill	1331	3	6	2012			around dog pens on Williams Road
NCSC	Saccharum baldwinii Spreng.	Poaceae	Monocots	sensu Weakley 2012	U.S.A.	NC	Pender	in savanna on east side of Alligator Lake Road, immediately south of junction with Flo Road	Very Wet Loamy Pine Savanna (sensu Schafale 2012)		8 m. msl	34deg.34'54.2" N	77deg.38'38.5" W	50	Robert Thornhill	1111	16	9	2011
NCSC	Saccharum baldwinii Spreng.	Poaceae	Monocots	sensu Weakley 2012	U.S.A.	NC	Pender	in savanna on east side of Alligator Lake Road, immediately south of junction with Flo Road	Very Wet Loamy Pine Savanna (sensu Schafale 2012)		8 m. msl	34deg.34'54.2" N	77deg.38'38.5" W	50	Robert Thornhill	1189	23	10	2011
NCSC	Saccharum baldwinii Spreng.	Poaceae	Monocots	sensu Weakley 2012	U.S.A.	NC	Pender	in savanna on east side of Alligator Lake Road, immediately south of junction with Flo Road	Very Wet Loamy Pine Savanna (sensu Schafale 2012)		8 m. msl	34deg.34'54.2" N	77deg.38'38.5" W	50	Robert Thornhill	1189	23	10	2011
NCSC	Saccharum coarctatum (Fernald) R.D. Webster	Poaceae	Monocots	sensu Weakley 2012	U.S.A.	NC	Pender	in savanna immediately south of Flo Road, approximately 0.3km east of intersection of Flo Road and Fill Road	Wet Loamy Pine Savanna (sensu Schafale 2012)		8 m. msl	34deg.34'56.3" N	77deg.38'48.6" W	50	Robert Thornhill	1019	2	9	2011		y
NCSC	Saccharum coarctatum (Fernald) R.D. Webster	Poaceae	Monocots	sensu Weakley 2012	U.S.A.	NC	Pender	in savanna immediately south of Flo Road, approximately 0.3km east of intersection of Flo Road and Fill Road	Wet Loamy Pine Savanna (sensu Schafale 2012)		8 m. msl	34deg.34'56.3" N	77deg.38'48.6" W	50	Robert Thornhill	1249	6	11	2011
NCSC	Saccharum giganteum (Walter) Pers.	Poaceae	Monocots	sensu Weakley 2012	U.S.A.	NC	Pender	in pine savannas along Flo Road, approximately 0.4-1.2 km southeast of junction with Half Moon Road	Sandy Pine Savanna (Rush Featherling subtype) sensu Schafale 2012	occasional	9 m. msl	34deg.35'11.9" N	77deg.39'45.9" W	400	Robert Thornhill	1215	28	10	2011
NCSC	Saccharum giganteum (Walter) Pers.	Poaceae	Monocots	sensu Weakley 2012	U.S.A.	NC	Pender	in savanna on east side of Alligator Lake Road, immediately south of junction with Flo Road	Very Wet Loamy Pine Savanna (sensu Schafale 2012)	occasional	8 m. msl	34deg.34'54.2" N	77deg.38'38.5" W	50	Robert Thornhill	1187	23	10	2011		y
NCSC	Saccharum giganteum (Walter) Pers.	Poaceae	Monocots	sensu Weakley 2012	U.S.A.	NC	Pender	in savanna on east side of Alligator Lake Road, immediately south of junction with Flo Road	Very Wet Loamy Pine Savanna (sensu Schafale 2012)	occasional	8 m. msl	34deg.34'54.2" N	77deg.38'38.5" W	50	Robert Thornhill	1188	23	10	2011
NCSC	Saccharum giganteum (Walter) Pers.	Poaceae	Monocots	sensu Weakley 2012	U.S.A.	NC	Pender	in savanna immediately south of Flo Road, approximately 0.3km east of intersection of Flo Road and Fill Road	Wet Loamy Pine Savanna (sensu Schafale 2012)	occasional	8 m. msl	34deg.34'56.3" N	77deg.38'48.6" W	50	Robert Thornhill	1023	2	9	2011
NCSC	Schedonorus arundinaceus (Schreb.) Dumort.	Poaceae	Monocots	sensu Weakley 2012	U.S.A.	NC	Pender	around dog pens on Williams Road, approximately .25 km southwest of hunting lodge	weedy roadside	infrequent	8 m. msl	34deg.35'52.9" N	77deg.40'7.3" W	20	Robert Thornhill	1337	3	6	2012			around dog pens on Williams Road
NCSC	Schedonorus arundinaceus (Schreb.) Dumort.	Poaceae	Monocots	sensu Weakley 2012	U.S.A.	NC	Pender	around dog pens on Williams Road, approximately .25 km southwest of hunting lodge	weedy roadside	infrequent	8 m. msl	34deg.35'52.9" N	77deg.40'7.3" W	20	Robert Thornhill	1337	3	6	2012			around dog pens on Williams Road
NCSC	Schedonorus arundinaceus (Schreb.) Dumort.	Poaceae	Monocots	sensu Weakley 2012	U.S.A.	NC	Pender	around dog pens on Williams Road, approximately .25 km southwest of hunting lodge	weedy roadside	infrequent	8 m. msl	34deg.35'52.9" N	77deg.40'7.3" W	20	Robert Thornhill	1349	3	6	2012			around dog pens on Williams Road
NCSC	Schizachyrium scoparium (Michx.) Nash var. scoparium	Poaceae	Monocots	sensu Weakley 2012	U.S.A.	NC	Pender	in pine savanna on northeast corner of intersection of Flo Road and Fill Road	Very Wet Loamy Pine Savanna (sensu Schafale 2012)	frequent	8 m. msl	34deg.35'0.1" N	77deg.38'59.2" W	50	Robert Thornhill	769	3	8	2011		y
NCSC	Schizachyrium scoparium (Michx.) Nash var. scoparium	Poaceae	Monocots	sensu Weakley 2012	U.S.A.	NC	Pender	in pine savanna on northeast corner of intersection of Flo Road and Fill Road	Very Wet Loamy Pine Savanna (sensu Schafale 2012)	frequent	8 m. msl	34deg.35'0.1" N	77deg.38'59.2" W	50	Robert Thornhill	769	3	8	2011		y
NCSC	Schizachyrium scoparium (Michx.) Nash var. scoparium	Poaceae	Monocots	sensu Weakley 2012	U.S.A.	NC	Pender	in pine savanna on northeast corner of intersection of Flo Road and Fill Road	Very Wet Loamy Pine Savanna (sensu Schafale 2012)	occasional	8 m. msl	34deg.35'0.1" N	77deg.38'59.2" W	50	Robert Thornhill	926	19	8	2011		y
NCSC	Schizachyrium scoparium (Michx.) Nash var. scoparium	Poaceae	Monocots	sensu Weakley 2012	U.S.A.	NC	Pender	in small pine savanna on south side of Flo Road, approximately .1 km west of junction with Alligator Lake Road	Very Wet Loamy Pine Savanna (sensu Schafale 2012)	frequent	9 m. msl	34deg.34'58.0" N	77deg.38'41.0" W	20	Robert Thornhill	867	12	8	2011
NCSC	Schizachyrium scoparium (Michx.) Nash var. scoparium	Poaceae	Monocots	sensu Weakley 2012	U.S.A.	NC	Pender	in small pine savanna on south side of Flo Road, approximately .1 km west of junction with Alligator Lake Road	Very Wet Loamy Pine Savanna (sensu Schafale 2012)	frequent	9 m. msl	34deg.34'58.0" N	77deg.38'41.0" W	20	Robert Thornhill	867	12	8	2011
NCSC	Schizachyrium scoparium (Michx.) Nash var. scoparium	Poaceae	Monocots	sensu Weakley 2012	U.S.A.	NC	Pender	in savanna on east side of Alligator Lake Road, immediately south of junction with Flo Road	Very Wet Loamy Pine Savanna (sensu Schafale 2012)	frequent	8 m. msl	34deg.34'54.2" N	77deg.38'38.5" W	50	Robert Thornhill	1017	2	9	2011		y
NCSC	Schizachyrium scoparium (Michx.) Nash var. scoparium	Poaceae	Monocots	sensu Weakley 2012	U.S.A.	NC	Pender	in savanna on east side of Alligator Lake Road, immediately south of junction with Flo Road	Very Wet Loamy Pine Savanna (sensu Schafale 2012)	frequent	8 m. msl	34deg.34'54.2" N	77deg.38'38.5" W	50	Robert Thornhill	1024	2	9	2011
NCSC	Schizachyrium scoparium (Michx.) Nash var. scoparium	Poaceae	Monocots	sensu Weakley 2012	U.S.A.	NC	Pender	in savanna on east side of Alligator Lake Road, immediately south of junction with Flo Road	Very Wet Loamy Pine Savanna (sensu Schafale 2012)		8 m. msl	34deg.34'54.2" N	77deg.38'38.5" W	50	Robert Thornhill	1155	7	10	2011
NCSC	Schizachyrium scoparium (Michx.) Nash var. scoparium	Poaceae	Monocots	sensu Weakley 2012	U.S.A.	NC	Pender	in savanna on east side of Alligator Lake Road, immediately south of junction with Flo Road	Very Wet Loamy Pine Savanna (sensu Schafale 2012)		8 m. msl	34deg.34'54.2" N	77deg.38'38.5" W	50	Robert Thornhill	1197	23	10	2011
NCSC	Schizachyrium scoparium (Michx.) Nash var. scoparium	Poaceae	Monocots	sensu Weakley 2012	U.S.A.	NC	Pender	in Spodosol savanna on east side of Half Moon Road, 0.5-1.5 km southwest of intersection of Half Moon Road and Flo Road	Sandy Pine Savanna (Typic subtype) sensu Schafale 2012	occasional	9 m. msl	34deg.35'15.7" N	77deg.40'16.0" W	500	Robert Thornhill	914	19	8	2011		y
NCSC	Schizachyrium scoparium (Michx.) Nash var. scoparium	Poaceae	Monocots	sensu Weakley 2012	U.S.A.	NC	Pender	in large savanna immediately south of intersection of Flo Road and Fill Road	Wet Loamy Pine Savanna (sensu Schafale 2012)	frequent	8 m. msl	34deg.34'54.7" N	77deg.39'9.0" W	100	Robert Thornhill	849	12	8	2011		y
NCSC	Schizachyrium scoparium (Michx.) Nash var. scoparium	Poaceae	Monocots	sensu Weakley 2012	U.S.A.	NC	Pender	in large savanna immediately south of intersection of Flo Road and Fill Road	Wet Loamy Pine Savanna (sensu Schafale 2012)	frequent	8 m. msl	34deg.34'54.7" N	77deg.39'9.0" W	100	Robert Thornhill	849	12	8	2011		y
NCSC	Schizachyrium scoparium (Michx.) Nash var. scoparium	Poaceae	Monocots	sensu Weakley 2012	U.S.A.	NC	Pender	in savanna immediately south of Flo Road, approximately 0.3km east of intersection of Flo Road and Fill Road	Wet Loamy Pine Savanna (sensu Schafale 2012)	frequent	8 m. msl	34deg.34'56.3" N	77deg.38'48.6" W	50	Robert Thornhill	863	12	8	2011
NCSC	Schizachyrium scoparium (Michx.) Nash var. scoparium	Poaceae	Monocots	sensu Weakley 2012	U.S.A.	NC	Pender	in savanna immediately south of Flo Road, approximately 0.3km east of intersection of Flo Road and Fill Road	Wet Loamy Pine Savanna (sensu Schafale 2012)	frequent	8 m. msl	34deg.34'56.3" N	77deg.38'48.6" W	50	Robert Thornhill	863	12	8	2011
NCSC	Schizachyrium scoparium (Michx.) Nash var. scoparium	Poaceae	Monocots	sensu Weakley 2012	U.S.A.	NC	Pender	in savanna immediately south of Flo Road, approximately 0.3km east of intersection of Flo Road and Fill Road	Wet Loamy Pine Savanna (sensu Schafale 2012)	frequent	8 m. msl	34deg.34'56.3" N	77deg.38'48.6" W	50	Robert Thornhill	1248	6	11	2011
NCSC	Setaria parviflora (Poir.) Kerguélen	Poaceae	Monocots	sensu Weakley 2012	U.S.A.	NC	Pender	in pine savanna on northeast corner of intersection of Flo Road and Fill Road	Very Wet Loamy Pine Savanna (sensu Schafale 2012)	occasional	8 m. msl	34deg.35'0.1" N	77deg.38'59.2" W	50	Robert Thornhill	855	12	8	2011		y
NCSC	Setaria parviflora (Poir.) Kerguélen	Poaceae	Monocots	sensu Weakley 2012	U.S.A.	NC	Pender	in pine savanna on northeast corner of intersection of Flo Road and Fill Road	Very Wet Loamy Pine Savanna (sensu Schafale 2012)	occasional	8 m. msl	34deg.35'0.1" N	77deg.38'59.2" W	50	Robert Thornhill	768	3	8	2011		y
NCSC	Setaria parviflora (Poir.) Kerguélen	Poaceae	Monocots	sensu Weakley 2012	U.S.A.	NC	Pender	in pine savanna on northeast corner of intersection of Flo Road and Fill Road	Very Wet Loamy Pine Savanna (sensu Schafale 2012)	occasional	8 m. msl	34deg.35'0.1" N	77deg.38'59.2" W	50	Robert Thornhill	768	3	8	2011		y
NCSC	Setaria parviflora (Poir.) Kerguélen	Poaceae	Monocots	sensu Weakley 2012	U.S.A.	NC	Pender	in savanna on east side of Alligator Lake Road, immediately south of junction with Flo Road	Very Wet Loamy Pine Savanna (sensu Schafale 2012)	infrequent	8 m. msl	34deg.34'54.2" N	77deg.38'38.5" W	50	Robert Thornhill	711	21	7	2011
NCSC	Setaria parviflora (Poir.) Kerguélen	Poaceae	Monocots	sensu Weakley 2012	U.S.A.	NC	Pender	disturbed open area in powerline right-of-way, immediately east of hunting lodge on Williams Road	disturbed open area in powerline right-of-way	occasional	7 m. msl	34deg.35'56.8" N	77deg.39'56.5" W	10	Robert Thornhill	1373	11	6	2012			in powerline cut just east of hunting lodge
NCSC	Sorghastrum nutans (L.) Nash	Poaceae	Monocots	sensu Weakley 2012	U.S.A.	NC	Pender	in pine savanna on northeast corner of intersection of Flo Road and Fill Road	Very Wet Loamy Pine Savanna (sensu Schafale 2012)	occasional	8 m. msl	34deg.35'0.1" N	77deg.38'59.2" W	50	Robert Thornhill	1158	7	10	2011
NCSC	Sorghastrum nutans (L.) Nash	Poaceae	Monocots	sensu Weakley 2012	U.S.A.	NC	Pender	in savanna on east side of Alligator Lake Road, immediately south of junction with Flo Road	Very Wet Loamy Pine Savanna (sensu Schafale 2012)	infrequent	8 m. msl	34deg.34'54.2" N	77deg.38'38.5" W	50	Robert Thornhill	1095	16	9	2011		y
NCSC	Sorghastrum nutans (L.) Nash	Poaceae	Monocots	sensu Weakley 2012	U.S.A.	NC	Pender	in savanna on east side of Alligator Lake Road, immediately south of junction with Flo Road	Very Wet Loamy Pine Savanna (sensu Schafale 2012)	infrequent	8 m. msl	34deg.34'54.2" N	77deg.38'38.5" W	50	Robert Thornhill	1095	16	9	2011		y
NCSC	Sporobolus indicus (L.) R. Br.	Poaceae	Monocots	sensu Weakley 2012	U.S.A.	NC	Pender	in food plot northwest of intersection of Alligator Lake Road and Flo Road	weedy open area (food plot)	occasional	8 m. msl	34deg.34'59.0" N	77deg.38'46.7" W	100	Robert Thornhill	1463	26	7	2012			in food plot north of Alligator Lake Road
NCSC	Sporobolus pinetorum Weakley & P.M. Peterson	Poaceae	Monocots	sensu Weakley 2012	U.S.A.	NC	Pender	in flatwoods/savanna approximately 80 meters north of intersection of Alligator Lake Road and Flo Road, just east of food plot	Mesic Pine Savanna (Coastal Plain subtype) sensu Schafale 2012	frequent	9 m. msl	34deg.35'0.8" N	77deg.38'37.7" W	50	Robert Thornhill	1018	2	9	2011
NCSC	Sporobolus pinetorum Weakley & P.M. Peterson	Poaceae	Monocots	sensu Weakley 2012	U.S.A.	NC	Pender	in flatwoods/savanna approximately 80 meters north of intersection of Alligator Lake Road and Flo Road, just east of food plot	Mesic Pine Savanna (Coastal Plain subtype) sensu Schafale 2012	frequent	9 m. msl	34deg.35'0.8" N	77deg.38'37.7" W	50	Robert Thornhill	1018	2	9	2011
NCSC	Sporobolus pinetorum Weakley & P.M. Peterson	Poaceae	Monocots	sensu Weakley 2012	U.S.A.	NC	Pender	in pine savanna on northeast corner of intersection of Flo Road and Fill Road	Very Wet Loamy Pine Savanna (sensu Schafale 2012)	frequent	8 m. msl	34deg.35'0.1" N	77deg.38'59.2" W	50	Robert Thornhill	770	3	8	2011
NCSC	Sporobolus pinetorum Weakley & P.M. Peterson	Poaceae	Monocots	sensu Weakley 2012	U.S.A.	NC	Pender	in pine savannas along Flo Road, approximately 0.4-1.2 km southeast of junction with Half Moon Road	Sandy Pine Savanna (Rush Featherling subtype) sensu Schafale 2012	frequent	9 m. msl	34deg.35'11.9" N	77deg.39'45.9" W	400	Robert Thornhill	651	14	7	2011		y
NCSC	Sporobolus pinetorum Weakley & P.M. Peterson	Poaceae	Monocots	sensu Weakley 2012	U.S.A.	NC	Pender	in pine savannas along Flo Road, approximately 0.4-1.2 km southeast of junction with Half Moon Road	Sandy Pine Savanna (Rush Featherling subtype) sensu Schafale 2012	frequent	9 m. msl	34deg.35'11.9" N	77deg.39'45.9" W	400	Robert Thornhill	656	14	7	2011
NCSC	Sporobolus pinetorum Weakley & P.M. Peterson	Poaceae	Monocots	sensu Weakley 2012	U.S.A.	NC	Pender	in pine savannas along Flo Road, approximately 0.4-1.2 km southeast of junction with Half Moon Road	Sandy Pine Savanna (Rush Featherling subtype) sensu Schafale 2012	frequent	9 m. msl	34deg.35'11.9" N	77deg.39'45.9" W	400	Robert Thornhill	656	14	7	2011
NCSC	Sporobolus pinetorum Weakley & P.M. Peterson	Poaceae	Monocots	sensu Weakley 2012	U.S.A.	NC	Pender	in pine savannas along Flo Road, approximately 0.4-1.2 km southeast of junction with Half Moon Road	Sandy Pine Savanna (Rush Featherling subtype) sensu Schafale 2012	frequent	9 m. msl	34deg.35'11.9" N	77deg.39'45.9" W	400	Robert Thornhill	818	4	8	2011
NCSC	Sporobolus pinetorum Weakley & P.M. Peterson	Poaceae	Monocots	sensu Weakley 2012	U.S.A.	NC	Pender	in savanna on east side of Alligator Lake Road, immediately south of junction with Flo Road	Very Wet Loamy Pine Savanna (sensu Schafale 2012)	frequent	8 m. msl	34deg.34'54.2" N	77deg.38'38.5" W	50	Robert Thornhill	724	21	7	2011
NCSC	Sporobolus pinetorum Weakley & P.M. Peterson	Poaceae	Monocots	sensu Weakley 2012	U.S.A.	NC	Pender	in savanna immediately south of Flo Road, approximately 0.3km east of intersection of Flo Road and Fill Road	Wet Loamy Pine Savanna (sensu Schafale 2012)	frequent	8 m. msl	34deg.34'56.3" N	77deg.38'48.6" W	50	Robert Thornhill	694	21	7	2011		y
NCSC	Sporobolus pinetorum Weakley & P.M. Peterson	Poaceae	Monocots	sensu Weakley 2012	U.S.A.	NC	Pender	in savanna immediately south of Flo Road, approximately 0.3km east of intersection of Flo Road and Fill Road	Wet Loamy Pine Savanna (sensu Schafale 2012)	frequent	8 m. msl	34deg.34'56.3" N	77deg.38'48.6" W	50	Robert Thornhill	694	21	7	2011		y
NCSC	Sporobolus pinetorum Weakley & P.M. Peterson	Poaceae	Monocots	sensu Weakley 2012	U.S.A.	NC	Pender	in savanna immediately south of Flo Road, approximately 0.3km east of intersection of Flo Road and Fill Road	Wet Loamy Pine Savanna (sensu Schafale 2012)	frequent	8 m. msl	34deg.34'56.3" N	77deg.38'48.6" W	50	Robert Thornhill	699	21	7	2011
NCSC	Sporobolus pinetorum Weakley & P.M. Peterson	Poaceae	Monocots	sensu Weakley 2012	U.S.A.	NC	Pender	in savanna immediately south of Flo Road, approximately 0.3km east of intersection of Flo Road and Fill Road	Wet Loamy Pine Savanna (sensu Schafale 2012)	frequent	8 m. msl	34deg.34'56.3" N	77deg.38'48.6" W	50	Robert Thornhill	699	21	7	2011
NCSC	Tripsacum dactyloides (L.) L. var. dactyloides	Poaceae	Monocots	sensu Weakley 2012	U.S.A.	NC	Pender	around dog pens on Williams Road, approximately .25 km southwest of hunting lodge	weedy roadside	infrequent	8 m. msl	34deg.35'52.9" N	77deg.40'7.3" W	20	Robert Thornhill	1431	11	7	2012			around dog pens on Williams Road
NCSC	Triticum aestivum L.	Poaceae	Monocots	sensu Weakley 2012	U.S.A.	NC	Pender	approximately 130 meters south of hunting lodge, adjacent to powerline right-of-way	disturbed roadside	rare	8 m. msl	34deg.35'53.6" N	77deg.40'1.4" W	20	Robert Thornhill	1378	11	6	2012			approximately 250 yards south of lodge, along edge of powerline cut
NCSC	Urochloa platyphylla (Munro ex C. Wright) R.D. Webster	Poaceae	Monocots	sensu Weakley 2012	U.S.A.	NC	Pender	in food plot northwest of intersection of Alligator Lake Road and Flo Road	weedy open area (food plot)	rare	8 m. msl	34deg.34'59.0" N	77deg.38'46.7" W	100	Robert Thornhill	1527	14	8	2012			in food plot across from Alligator Lake Road
NCSC	Vulpia octoflora (Walter) Rydb. var. octoflora	Poaceae	Monocots	sensu Weakley 2012	U.S.A.	NC	Pender	in along Flo Road at junction with Alligator Lake Road	sandy roadside	frequent	8 m. msl	34deg.34'58.3" N	77deg.38'38.2" W	5	Robert Thornhill	1279	2	5	2012			along Flo Road at junction with Alligator Lake Road
NCSC	Pontederia cordata L.	Pontederiaceae	Monocots	sensu FNA	U.S.A.	NC	Pender	in ditch along west side of Half Moon Road, approximately .3 km north of the end of Half Moon Road	roadside ditch	occasional	7 m. msl	34deg.34'41.9" N	77deg.40'21.8" W	20	Robert Thornhill	1351	11	6	2012		y	in ditch along west side of Half Moon Road, approximately .2 mi south of the end of Half Moon Road
NCSC	Pontederia cordata L.	Pontederiaceae	Monocots	sensu FNA	U.S.A.	NC	Pender	in depression along unnamed path approximately .4 mi east of end of Half Moon Road	Coastal Plain Small Stream Swamp (?) sensu Schafale 2012	infrequent	7 m. msl	34deg.34'40.2" N	77deg.40'15.0" W	100	Robert Thornhill	1357	11	6	2012			in depression in unnamed path approximately .4 mi east of end of Half Moon Road
NCSC	Smilax bona-nox L.	Smilacaceae	Monocots	sensu Weakley 2012	U.S.A.	NC	Pender	in swamp on south side of Flo Road, approximately 1.2 km east of junction with Alligator Lake Road	swamp forest	occasional	8 m. msl	34deg.34'50.0" N	77deg.37'59.0" W	100	Robert Thornhill	1485	26	7	2012			in swamp on south side of Flo Road, approximately 1 mi east of intersection with Alligator Lake Road
NCSC	Smilax bona-nox L.	Smilacaceae	Monocots	sensu Weakley 2012	U.S.A.	NC	Pender	just north of Flo Road, approximately 1.2 km east of intersection with Alligator Lake Road	Coastal Plain Small Stream Swamp (?) sensu Schafale 2012	occasional	9 m. msl	34deg.34'47.5" N	77deg.37'53.7" W	50	Robert Thornhill	1409	15	6	2012			just north of Flo Road, approximately .75 mi east of intersection with Alligator Lake Road
NCSC	Smilax glauca Walter	Smilacaceae	Monocots	sensu Weakley 2012	U.S.A.	NC	Pender	in small pine savanna on south side of Flo Road, approximately .1 km west of junction with Alligator Lake Road	Very Wet Loamy Pine Savanna (sensu Schafale 2012)	occasional	9 m. msl	34deg.34'58.0" N	77deg.38'41.0" W	20	Robert Thornhill	837	12	8	2011
NCSC	Smilax glauca Walter	Smilacaceae	Monocots	sensu Weakley 2012	U.S.A.	NC	Pender	in savanna on east side of Alligator Lake Road, immediately south of junction with Flo Road	Very Wet Loamy Pine Savanna (sensu Schafale 2012)	infrequent	8 m. msl	34deg.34'54.2" N	77deg.38'38.5" W	50	Robert Thornhill	1052	2	9	2011
NCSC	Smilax glauca Walter	Smilacaceae	Monocots	sensu Weakley 2012	U.S.A.	NC	Pender	in Spodosol savanna on east side of Half Moon Road, 0.5-1.5 km southwest of intersection of Half Moon Road and Flo Road	Sandy Pine Savanna (Typic subtype) sensu Schafale 2012		9 m. msl	34deg.35'15.7" N	77deg.40'16.0" W	500	Robert Thornhill	395	31	5	2011
NCSC	Smilax glauca Walter	Smilacaceae	Monocots	sensu Weakley 2012	U.S.A.	NC	Pender	in large savanna immediately south of intersection of Flo Road and Fill Road	Wet Loamy Pine Savanna (sensu Schafale 2012)		8 m. msl	34deg.34'54.7" N	77deg.39'9.0" W	100	Robert Thornhill	294	15	5	2011		y
NCSC	Smilax glauca Walter	Smilacaceae	Monocots	sensu Weakley 2012	U.S.A.	NC	Pender	in large savanna immediately south of intersection of Flo Road and Fill Road	Wet Loamy Pine Savanna (sensu Schafale 2012)		8 m. msl	34deg.34'54.7" N	77deg.39'9.0" W	100	Robert Thornhill	294	15	5	2011		y
NCSC	Smilax glauca Walter	Smilacaceae	Monocots	sensu Weakley 2012	U.S.A.	NC	Pender	in savanna immediately south of Flo Road, approximately 0.3km east of intersection of Flo Road and Fill Road	Wet Loamy Pine Savanna (sensu Schafale 2012)	infrequent	8 m. msl	34deg.34'56.3" N	77deg.38'48.6" W	50	Robert Thornhill	1235	6	11	2011
NCSC	Smilax hispida Raf.	Smilacaceae	Monocots	sensu Weakley 2012	U.S.A.	NC	Pender	in swamp on south side of Flo Road, approximately 1.2 km east of junction with Alligator Lake Road	swamp forest	occasional	8 m. msl	34deg.34'50.0" N	77deg.37'59.0" W	100	Robert Thornhill	1486	26	7	2012		y	in swamp on south side of Flo Road, approximately 1 mi east of intersection with Alligator Lake Road
NCSC	Smilax laurifolia L.	Smilacaceae	Monocots	sensu Weakley 2012	U.S.A.	NC	Pender	in pine savannas along Flo Road, approximately 0.4-1.2 km southeast of junction with Half Moon Road	Sandy Pine Savanna (Rush Featherling subtype) sensu Schafale 2012		9 m. msl	34deg.35'11.9" N	77deg.39'45.9" W	400	Robert Thornhill	181	22	4	2011
NCSC	Smilax laurifolia L.	Smilacaceae	Monocots	sensu Weakley 2012	U.S.A.	NC	Pender	in Spodosol savanna on east side of Half Moon Road, 0.5-1.5 km southwest of intersection of Half Moon Road and Flo Road	Sandy Pine Savanna (Typic subtype) sensu Schafale 2012		9 m. msl	34deg.35'15.7" N	77deg.40'16.0" W	500	Robert Thornhill	168	22	4	2011
NCSC	Smilax laurifolia L.	Smilacaceae	Monocots	sensu Weakley 2012	U.S.A.	NC	Pender	in Spodosol savanna on east side of Half Moon Road, 0.5-1.5 km southwest of intersection of Half Moon Road and Flo Road	Sandy Pine Savanna (Typic subtype) sensu Schafale 2012		9 m. msl	34deg.35'15.7" N	77deg.40'16.0" W	500	Robert Thornhill	262	15	5	2011
NCSC	Smilax rotundifolia L.	Smilacaceae	Monocots	sensu Weakley 2012	U.S.A.	NC	Pender	along south side of path, approximately .1 km west of the southern terminus of Half Moon Road	Wet Pine Flatwoods (Typic subtype ) sensu Schafale 2012	occasional	7 m. msl	34deg.34'33.5" N	77deg.40'22.5" W	20	Robert Thornhill	1359	11	6	2012			approximately .1 mi west of end of Half Moon Road
NCSC	Smilax smallii Morong	Smilacaceae	Monocots	sensu Weakley 2012	U.S.A.	NC	Pender	in savanna on east side of Alligator Lake Road, immediately south of junction with Flo Road	Very Wet Loamy Pine Savanna (sensu Schafale 2012)	infrequent	8 m. msl	34deg.34'54.2" N	77deg.38'38.5" W	50	Robert Thornhill	1182	23	10	2011		y
NCSC	Smilax smallii Morong	Smilacaceae	Monocots	sensu Weakley 2012	U.S.A.	NC	Pender	in swamp on south side of Flo Road, approximately 1.2 km east of junction with Alligator Lake Road	swamp forest	occasional	8 m. msl	34deg.34'50.0" N	77deg.37'59.0" W	100	Robert Thornhill	1492	26	7	2012			in swamp on south side of Flo Road, approximately 1 mi east of intersection with Alligator Lake Road
NCSC	Smilax walteri Pursh	Smilacaceae	Monocots	sensu Weakley 2012	U.S.A.	NC	Pender	just east of bridge over Shaken Creek on Williams Road, near northern border of Holly Shelter Game Lands	Coastal Plain Small Stream Swamp sensu Schafale 2012	occasional	6 m. msl	34deg.34'55.8" N	77deg.41'29.9" W	50	Robert Thornhill	1499	3	8	2012			just east of bridge over Shaken Creek
NCSC	Pleea tenuifolia Michx.	Tofieldiaceae	Monocots	sensu Weakley 2012	U.S.A.	NC	Pender	in Spodosol savanna on east side of Half Moon Road, 0.5-1.5 km southwest of intersection of Half Moon Road and Flo Road	Sandy Pine Savanna (Typic subtype) sensu Schafale 2012	frequent	9 m. msl	34deg.35'15.7" N	77deg.40'16.0" W	500	Robert Thornhill	27	21	8	2010
NCSC	Pleea tenuifolia Michx.	Tofieldiaceae	Monocots	sensu Weakley 2012	U.S.A.	NC	Pender	in Spodosol savanna on east side of Half Moon Road, 0.5-1.5 km southwest of intersection of Half Moon Road and Flo Road	Sandy Pine Savanna (Typic subtype) sensu Schafale 2012	frequent	9 m. msl	34deg.35'15.7" N	77deg.40'16.0" W	500	Robert Thornhill	27	21	8	2010
NCSC	Pleea tenuifolia Michx.	Tofieldiaceae	Monocots	sensu Weakley 2012	U.S.A.	NC	Pender	in Spodosol savanna on east side of Half Moon Road, 0.5-1.5 km southwest of intersection of Half Moon Road and Flo Road	Sandy Pine Savanna (Typic subtype) sensu Schafale 2012	frequent	9 m. msl	34deg.35'15.7" N	77deg.40'16.0" W	500	Robert Thornhill	27	21	8	2010
NCSC	Tofieldia glabra Nutt.	Tofieldiaceae	Monocots	sensu Weakley 2012	U.S.A.	NC	Pender	in pine savannas along Flo Road, approximately 0.4-1.2 km southeast of junction with Half Moon Road	Sandy Pine Savanna (Rush Featherling subtype) sensu Schafale 2012	infrequent	9 m. msl	34deg.35'11.9" N	77deg.39'45.9" W	400	Robert Thornhill	1208	28	10	2011
NCSC	Tofieldia glabra Nutt.	Tofieldiaceae	Monocots	sensu Weakley 2012	U.S.A.	NC	Pender	in savanna on east side of Alligator Lake Road, immediately south of junction with Flo Road	Very Wet Loamy Pine Savanna (sensu Schafale 2012)	infrequent	8 m. msl	34deg.34'54.2" N	77deg.38'38.5" W	50	Robert Thornhill	1121	25	9	2011		y
NCSC	Tofieldia glabra Nutt.	Tofieldiaceae	Monocots	sensu Weakley 2012	U.S.A.	NC	Pender	in Spodosol savanna on east side of Half Moon Road, 0.5-1.5 km southwest of intersection of Half Moon Road and Flo Road	Sandy Pine Savanna (Typic subtype) sensu Schafale 2012	rare	9 m. msl	34deg.35'15.7" N	77deg.40'16.0" W	500	Robert Thornhill	1202	28	10	2011
NCSC	Triantha racemosa (Walter) Small	Tofieldiaceae	Monocots	sensu Weakley 2012	U.S.A.	NC	Pender	in savanna on east side of Alligator Lake Road, immediately south of junction with Flo Road	Very Wet Loamy Pine Savanna (sensu Schafale 2012)	frequent	8 m. msl	34deg.34'54.2" N	77deg.38'38.5" W	50	Robert Thornhill	551	28	6	2011
NCSC	Triantha racemosa (Walter) Small	Tofieldiaceae	Monocots	sensu Weakley 2012	U.S.A.	NC	Pender	in savanna on east side of Alligator Lake Road, immediately south of junction with Flo Road	Very Wet Loamy Pine Savanna (sensu Schafale 2012)	frequent	8 m. msl	34deg.34'54.2" N	77deg.38'38.5" W	50	Robert Thornhill	682	21	7	2011
NCSC	Triantha racemosa (Walter) Small	Tofieldiaceae	Monocots	sensu Weakley 2012	U.S.A.	NC	Pender	in large savanna immediately south of intersection of Flo Road and Fill Road	Wet Loamy Pine Savanna (sensu Schafale 2012)	frequent	8 m. msl	34deg.34'54.7" N	77deg.39'9.0" W	100	Robert Thornhill	604	14	7	2011
NCSC	Triantha racemosa (Walter) Small	Tofieldiaceae	Monocots	sensu Weakley 2012	U.S.A.	NC	Pender	in savanna immediately south of Flo Road, approximately 0.3km east of intersection of Flo Road and Fill Road	Wet Loamy Pine Savanna (sensu Schafale 2012)	frequent	8 m. msl	34deg.34'56.3" N	77deg.38'48.6" W	50	Robert Thornhill	667	21	7	2011		y
NCSC	Typha latifolia L.	Typhaceae	Monocots	sensu Weakley 2012	U.S.A.	NC	Pender	along Flo Road at junction with powerline cut	sandy roadside	infrequent	8 m. msl	34deg.35'46.6" N	77deg.40'10.2" W	5	Robert Thornhill	1437	11	7	2012			south side of Flo Road at juncture with powerline cut
NCSC	Xyris ambigua Beyr. ex Kunth	Xyridaceae	Monocots	sensu Weakley 2012	U.S.A.	NC	Pender	in Spodosol savanna on east side of Half Moon Road, 0.5-1.5 km southwest of intersection of Half Moon Road and Flo Road	Sandy Pine Savanna (Typic subtype) sensu Schafale 2012	frequent	9 m. msl	34deg.35'15.7" N	77deg.40'16.0" W	500	Robert Thornhill	719	21	7	2011
NCSC	Xyris ambigua Beyr. ex Kunth	Xyridaceae	Monocots	sensu Weakley 2012	U.S.A.	NC	Pender	in pine savannas along Flo Road, approximately 0.4-1.2 km southeast of junction with Half Moon Road	Sandy Pine Savanna (Rush Featherling subtype) sensu Schafale 2012	frequent	9 m. msl	34deg.35'11.9" N	77deg.39'45.9" W	400	Robert Thornhill	588	14	7	2011		y
NCSC	Xyris ambigua Beyr. ex Kunth	Xyridaceae	Monocots	sensu Weakley 2012	U.S.A.	NC	Pender	in pine savannas along Flo Road, approximately 0.4-1.2 km southeast of junction with Half Moon Road	Sandy Pine Savanna (Rush Featherling subtype) sensu Schafale 2012	frequent	9 m. msl	34deg.35'11.9" N	77deg.39'45.9" W	400	Robert Thornhill	588	14	7	2011		y
NCSC	Xyris ambigua Beyr. ex Kunth	Xyridaceae	Monocots	sensu Weakley 2012	U.S.A.	NC	Pender	in pine savannas along Flo Road, approximately 0.4-1.2 km southeast of junction with Half Moon Road	Sandy Pine Savanna (Rush Featherling subtype) sensu Schafale 2012	frequent	9 m. msl	34deg.35'11.9" N	77deg.39'45.9" W	400	Robert Thornhill	801	4	8	2011
NCSC	Xyris ambigua Beyr. ex Kunth	Xyridaceae	Monocots	sensu Weakley 2012	U.S.A.	NC	Pender	in savanna on east side of Alligator Lake Road, immediately south of junction with Flo Road	Very Wet Loamy Pine Savanna (sensu Schafale 2012)	frequent	8 m. msl	34deg.34'54.2" N	77deg.38'38.5" W	50	Robert Thornhill	685	21	7	2011		y
NCSC	Xyris ambigua Beyr. ex Kunth	Xyridaceae	Monocots	sensu Weakley 2012	U.S.A.	NC	Pender	in savanna on east side of Alligator Lake Road, immediately south of junction with Flo Road	Very Wet Loamy Pine Savanna (sensu Schafale 2012)	frequent	8 m. msl	34deg.34'54.2" N	77deg.38'38.5" W	50	Robert Thornhill	708	21	7	2011
NCSC	Xyris ambigua Beyr. ex Kunth	Xyridaceae	Monocots	sensu Weakley 2012	U.S.A.	NC	Pender	in large savanna immediately south of intersection of Flo Road and Fill Road	Wet Loamy Pine Savanna (sensu Schafale 2012)	frequent	8 m. msl	34deg.34'54.7" N	77deg.39'9.0" W	100	Robert Thornhill	573	28	6	2011		y
NCSC	Xyris ambigua Beyr. ex Kunth	Xyridaceae	Monocots	sensu Weakley 2012	U.S.A.	NC	Pender	in large savanna immediately south of intersection of Flo Road and Fill Road	Wet Loamy Pine Savanna (sensu Schafale 2012)	frequent	8 m. msl	34deg.34'54.7" N	77deg.39'9.0" W	100	Robert Thornhill	628	14	7	2011
NCSC	Xyris ambigua Beyr. ex Kunth	Xyridaceae	Monocots	sensu Weakley 2012	U.S.A.	NC	Pender	in savanna immediately south of Flo Road, approximately 0.3km east of intersection of Flo Road and Fill Road	Wet Loamy Pine Savanna (sensu Schafale 2012)	frequent	8 m. msl	34deg.34'56.3" N	77deg.38'48.6" W	50	Robert Thornhill	669	21	7	2011		y
NCSC	Xyris baldwiniana Schult.	Xyridaceae	Monocots	sensu Weakley 2012	U.S.A.	NC	Pender	in Spodosol savanna on east side of Half Moon Road, 0.5-1.5 km southwest of intersection of Half Moon Road and Flo Road	Sandy Pine Savanna (Typic subtype) sensu Schafale 2012		9 m. msl	34deg.35'15.7" N	77deg.40'16.0" W	500	Robert Thornhill	528	21	6	2011
NCSC	Xyris baldwiniana Schult.	Xyridaceae	Monocots	sensu Weakley 2012	U.S.A.	NC	Pender	in Spodosol savanna on east side of Half Moon Road, 0.5-1.5 km southwest of intersection of Half Moon Road and Flo Road	Sandy Pine Savanna (Typic subtype) sensu Schafale 2012		9 m. msl	34deg.35'15.7" N	77deg.40'16.0" W	500	Robert Thornhill	528	21	6	2011
NCSC	Xyris brevifolia Michx.	Xyridaceae	Monocots	sensu Weakley 2012	U.S.A.	NC	Pender	in pine savannas along Flo Road, approximately 0.4-1.2 km southeast of junction with Half Moon Road	Sandy Pine Savanna (Rush Featherling subtype) sensu Schafale 2012		9 m. msl	34deg.35'11.9" N	77deg.39'45.9" W	400	Robert Thornhill	800	4	8	2011
NCSC	Xyris brevifolia Michx.	Xyridaceae	Monocots	sensu Weakley 2012	U.S.A.	NC	Pender	in Spodosol savanna on east side of Half Moon Road, 0.5-1.5 km southwest of intersection of Half Moon Road and Flo Road	Sandy Pine Savanna (Typic subtype) sensu Schafale 2012		9 m. msl	34deg.35'15.7" N	77deg.40'16.0" W	500	Robert Thornhill	37	21	8	2010
NCSC	Xyris brevifolia Michx.	Xyridaceae	Monocots	sensu Weakley 2012	U.S.A.	NC	Pender	in Spodosol savanna on east side of Half Moon Road, 0.5-1.5 km southwest of intersection of Half Moon Road and Flo Road	Sandy Pine Savanna (Typic subtype) sensu Schafale 2012		9 m. msl	34deg.35'15.7" N	77deg.40'16.0" W	500	Robert Thornhill	37	21	8	2010
NCSC	Xyris caroliniana Walter	Xyridaceae	Monocots	sensu Weakley 2012	U.S.A.	NC	Pender	in pine savannas along Flo Road, approximately 0.4-1.2 km southeast of junction with Half Moon Road	Sandy Pine Savanna (Rush Featherling subtype) sensu Schafale 2012		9 m. msl	34deg.35'11.9" N	77deg.39'45.9" W	400	Robert Thornhill	587	14	7	2011		y
NCSC	Xyris caroliniana Walter	Xyridaceae	Monocots	sensu Weakley 2012	U.S.A.	NC	Pender	in savanna on east side of Alligator Lake Road, immediately south of junction with Flo Road	Very Wet Loamy Pine Savanna (sensu Schafale 2012)		8 m. msl	34deg.34'54.2" N	77deg.38'38.5" W	50	Robert Thornhill	578	28	6	2011
NCSC	Xyris caroliniana Walter	Xyridaceae	Monocots	sensu Weakley 2012	U.S.A.	NC	Pender	in savanna on east side of Alligator Lake Road, immediately south of junction with Flo Road	Very Wet Loamy Pine Savanna (sensu Schafale 2012)		8 m. msl	34deg.34'54.2" N	77deg.38'38.5" W	50	Robert Thornhill	578	28	6	2011
NCSC	Xyris caroliniana Walter	Xyridaceae	Monocots	sensu Weakley 2012	U.S.A.	NC	Pender	in savanna immediately south of Flo Road, approximately 0.3km east of intersection of Flo Road and Fill Road	Wet Loamy Pine Savanna (sensu Schafale 2012)	frequent	8 m. msl	34deg.34'56.3" N	77deg.38'48.6" W	50	Robert Thornhill	677	21	7	2011		y
NCSC	Xyris curtissii Malme	Xyridaceae	Monocots	sensu Weakley 2012	U.S.A.	NC	Pender	in powerline cut between Bug Ridge Road and Flo Road	Wet Loamy Pine Savanna (sensu Schafale 2012)	infrequent	8 m. msl	34deg.34'56.3" N	77deg.38'48.6" W	50	Robert Thornhill	1507	3	8	2012			in powerline cut between Bug Ridge Road and Flo Road
NCSC	Xyris curtissii Malme	Xyridaceae	Monocots	sensu Weakley 2012	U.S.A.	NC	Pender	in pine savannas along Flo Road, approximately 0.4-1.2 km southeast of junction with Half Moon Road	Sandy Pine Savanna (Rush Featherling subtype) sensu Schafale 2012	infrequent	9 m. msl	34deg.35'11.9" N	77deg.39'45.9" W	400	Robert Thornhill	793	4	8	2011
NCSC	Xyris curtissii Malme	Xyridaceae	Monocots	sensu Weakley 2012	U.S.A.	NC	Pender	in large savanna immediately south of intersection of Flo Road and Fill Road	Wet Loamy Pine Savanna (sensu Schafale 2012)	infrequent	8 m. msl	34deg.34'54.7" N	77deg.39'9.0" W	100	Robert Thornhill	748	3	8	2011
NCSC	Xyris fimbriata Elliott	Xyridaceae	Monocots	sensu Weakley 2012	U.S.A.	NC	Pender	in borrow pit in Spodosol savanna/flatwood matrix on west side of Half Moon Road, approximately 1 km southwest of intersection of Half Moon Road and Flo Road	borrow pit in pine savanna (Sandy Pine Savanna (Typic subtype) sensu Schafale 2012	occasional	9 m. msl	34deg.35'15.7" N	77deg.40'16.0" W	1000	Robert Thornhill	919	19	8	2011
NCSC	Xyris fimbriata Elliott	Xyridaceae	Monocots	sensu Weakley 2012	U.S.A.	NC	Pender	in Spodosol savanna on east side of Half Moon Road, 0.5-1.5 km southwest of intersection of Half Moon Road and Flo Road	Sandy Pine Savanna (Typic subtype) sensu Schafale 2012		9 m. msl	34deg.35'15.7" N	77deg.40'16.0" W	500	Robert Thornhill	31	21	8	2010
NCSC	Xyris fimbriata Elliott	Xyridaceae	Monocots	sensu Weakley 2012	U.S.A.	NC	Pender	in Spodosol savanna on east side of Half Moon Road, 0.5-1.5 km southwest of intersection of Half Moon Road and Flo Road	Sandy Pine Savanna (Typic subtype) sensu Schafale 2012		9 m. msl	34deg.35'15.7" N	77deg.40'16.0" W	500	Robert Thornhill	31	21	8	2010
NCSC	Xyris fimbriata Elliott	Xyridaceae	Monocots	sensu Weakley 2012	U.S.A.	NC	Pender	in Spodosol savanna on east side of Half Moon Road, 0.5-1.5 km southwest of intersection of Half Moon Road and Flo Road	Sandy Pine Savanna (Typic subtype) sensu Schafale 2012		9 m. msl	34deg.35'15.7" N	77deg.40'16.0" W	500	Robert Thornhill	31	21	8	2010
NCSC	Xyris species 1 (sensu Weakley 2012)	Xyridaceae	Monocots	sensu Weakley 2012	U.S.A.	NC	Pender	in Spodosol savanna on east side of Half Moon Road, 0.5-1.5 km southwest of intersection of Half Moon Road and Flo Road	Sandy Pine Savanna (Typic subtype) sensu Schafale 2012		9 m. msl	34deg.35'15.7" N	77deg.40'16.0" W	500	Robert Thornhill	902	19	8	2011
NCSC	Sambucus canadensis L.	Adoxaceae	Eudicots	sensu Weakley 2012	U.S.A.	NC	Pender	around dog pens on Williams Road, approximately .25 km southwest of hunting lodge	weedy roadside	occasional	8 m. msl	34deg.35'52.9" N	77deg.40'7.3" W	20	Robert Thornhill	1365	11	6	2012			around dog pens on Williams Road, just south of lodge
NCSC	Viburnum nudum L.	Adoxaceae	Eudicots	sensu Weakley 2012	U.S.A.	NC	Pender	in ditch on south side of Mule Pen Road, approximately 1.25 km west of junctino with Williams Road	roadside ditch	infrequent	6 m. msl	34deg.35'18.2" N	77deg.42'5.5" W	20	Robert Thornhill	1330	3	6	2012		y	in ditch on south side of Mule Pen Road, approximately .8 mi west of intersection of Mule Pen Road and Williams Road
NCSC	Liquidambar styraciflua L.	Altingiaceae	Eudicots	sensu Weakley 2012	U.S.A.	NC	Pender	in savanna .18 km south of Flo Road at a point approximately 0.3km east of intersection of Flo Road and Fill Road	Very Wet Loamy Pine Savanna (sensu Schafale 2012)	infrequent	8 m. msl	34deg.34'50.5" N	77deg.38'46.6" W	50	Robert Thornhill	432	9	6	2011
NCSC	Liquidambar styraciflua L.	Altingiaceae	Eudicots	sensu Weakley 2012	U.S.A.	NC	Pender	in large savanna immediately south of intersection of Flo Road and Fill Road	Wet Loamy Pine Savanna (sensu Schafale 2012)	occasional	8 m. msl	34deg.34'54.7" N	77deg.39'9.0" W	100	Robert Thornhill	346	30	5	2011		y
NCSC	Chenopodium album L.	Amaranthaceae	Eudicots	sensu Weakley 2012	U.S.A.	NC	Pender	approximately 130 meters south of hunting lodge, adjacent to powerline right-of-way	disturbed roadside	rare	8 m. msl	34deg.35'53.6" N	77deg.40'1.4" W	20	Robert Thornhill	1380	11	6	2012			approximately 250 yards south of lodge, along edge of powerline cut
NCSC	Rhus copallinum L. var. copallinum	Anacardiaceae	Eudicots	sensu Weakley 2012	U.S.A.	NC	Pender	at northern side of pine savanna on northeast side Flo Road, approximately 1 km southeast of junction with Half Moon Road	Very Wet Loamy Pine Savanna (sensu Schafale 2012)	rare	8 m. msl	34deg.35'4.6" N	77deg.39'31.2" W	50	Robert Thornhill	954	26	8	2011		y
NCSC	Rhus copallinum L. var. copallinum	Anacardiaceae	Eudicots	sensu Weakley 2012	U.S.A.	NC	Pender	in large savanna immediately south of intersection of Flo Road and Fill Road	Wet Loamy Pine Savanna (sensu Schafale 2012)	rare	8 m. msl	34deg.34'54.7" N	77deg.39'9.0" W	100	Robert Thornhill	329	30	5	2011		y
NCSC	Toxicodendron radicans (L.) Kuntze var. radicans	Anacardiaceae	Eudicots	sensu Weakley 2012	U.S.A.	NC	Pender	in savanna .18 km south of Flo Road at a point approximately 0.3km east of intersection of Flo Road and Fill Road	Very Wet Loamy Pine Savanna (sensu Schafale 2012)	rare	8 m. msl	34deg.34'50.5" N	77deg.38'46.6" W	50	Robert Thornhill	136	16	4	2011
NCSC	Centella erecta (L. f.) Fernald	Apiaceae	Eudicots	sensu Weakley 2011	U.S.A.	NC	Pender	in small pine savanna on south side of Flo Road, approximately .1 km west of junction with Alligator Lake Road	Very Wet Loamy Pine Savanna (sensu Schafale 2012)	occasional	9 m. msl	34deg.34'58.0" N	77deg.38'41.0" W	20	Robert Thornhill	832	12	8	2011		y
NCSC	Centella erecta (L. f.) Fernald	Apiaceae	Eudicots	sensu Weakley 2011	U.S.A.	NC	Pender	in savanna immediately south of Flo Road, approximately 0.3km east of intersection of Flo Road and Fill Road	Wet Loamy Pine Savanna (sensu Schafale 2012)	occasional	8 m. msl	34deg.34'56.3" N	77deg.38'48.6" W	50	Robert Thornhill	879	12	8	2011
NCSC	Eryngium aquaticum L. var. aquaticum	Apiaceae	Eudicots	sensu Weakley 2012	U.S.A.	NC	Pender	in savanna on east side of Alligator Lake Road, immediately south of junction with Flo Road	Very Wet Loamy Pine Savanna (sensu Schafale 2012)	rare	8 m. msl	34deg.34'54.2" N	77deg.38'38.5" W	50	Robert Thornhill	842	12	8	2011
NCSC	Eryngium aquaticum L. var. aquaticum	Apiaceae	Eudicots	sensu Weakley 2012	U.S.A.	NC	Pender	in savanna on east side of Alligator Lake Road, immediately south of junction with Flo Road	Very Wet Loamy Pine Savanna (sensu Schafale 2012)	rare	8 m. msl	34deg.34'54.2" N	77deg.38'38.5" W	50	Robert Thornhill	1548	14	9	2012		y
NCSC	Eryngium aquaticum L. var. aquaticum	Apiaceae	Eudicots	sensu Weakley 2012	U.S.A.	NC	Pender	in marsh in powerline right-of-way, approximately .2 km north of Shaken Creek	Small Depression Pond (?) sensu Schafale 2012	frequent	6 m. msl	34deg.34'51.4" N	77deg.41'25.7" W	50	Robert Thornhill	1537	28	8	2012			in ponded area in powerline cut, just north of Shaken Creek
NCSC	Eryngium integrifolium Walter	Apiaceae	Eudicots	sensu Weakley 2012	U.S.A.	NC	Pender	at northern edge of pine savanna on northeast side Flo Road, approximately 1 km southeast of junction with Half Moon Road	Very Wet Loamy Pine Savanna (sensu Schafale 2012)	occasional	8 m. msl	34deg.35'4.6" N	77deg.39'31.2" W	50	Robert Thornhill	951	26	8	2011
NCSC	Eryngium integrifolium Walter	Apiaceae	Eudicots	sensu Weakley 2012	U.S.A.	NC	Pender	in savanna on east side of Alligator Lake Road, immediately south of junction with Flo Road	Very Wet Loamy Pine Savanna (sensu Schafale 2012)		8 m. msl	34deg.34'54.2" N	77deg.38'38.5" W	50	Robert Thornhill	7	21	8	2010		y
NCSC	Eryngium integrifolium Walter	Apiaceae	Eudicots	sensu Weakley 2012	U.S.A.	NC	Pender	in savanna on east side of Alligator Lake Road, immediately south of junction with Flo Road	Very Wet Loamy Pine Savanna (sensu Schafale 2012)		8 m. msl	34deg.34'54.2" N	77deg.38'38.5" W	50	Robert Thornhill	7	21	8	2010		y
NCSC	Eryngium prostratum Nutt. ex DC.	Apiaceae	Eudicots	sensu Weakley 2012	U.S.A.	NC	Pender	along western side of Flo Road at junction with Bug Ridge Road	weedy roadside	occasional	8 m. msl	34deg.35'54.2" N	77deg.40'5.0" W	5	Robert Thornhill	1382	11	6	2012			corner of Bug Ridge Road and Williams Road
NCSC	Eryngium yuccifolium Michx. var. synchaetum A. Gray ex J.M. Coult. & Rose	Apiaceae	Eudicots	sensu Weakley 2012	U.S.A.	NC	Pender	in savanna on east side of Alligator Lake Road, immediately south of junction with Flo Road	Very Wet Loamy Pine Savanna (sensu Schafale 2012)	occasional	8 m. msl	34deg.34'54.2" N	77deg.38'38.5" W	50	Robert Thornhill	703	21	7	2011
NCSC	Eryngium yuccifolium Michx. var. synchaetum A. Gray ex J.M. Coult. & Rose	Apiaceae	Eudicots	sensu Weakley 2012	U.S.A.	NC	Pender	in savanna immediately south of Flo Road, approximately 0.3km east of intersection of Flo Road and Fill Road	Wet Loamy Pine Savanna (sensu Schafale 2012)	frequent	8 m. msl	34deg.34'56.3" N	77deg.38'48.6" W	50	Robert Thornhill	689	21	7	2011		y
NCSC	Eryngium yuccifolium Michx. var. yuccifolium	Apiaceae	Eudicots	sensu Weakley 2012	U.S.A.	NC	Pender	in small pine savanna on south side of Flo Road, approximately .1 km west of junction with Alligator Lake Road	Very Wet Loamy Pine Savanna (sensu Schafale 2012)	occasional	9 m. msl	34deg.34'58.0" N	77deg.38'41.0" W	20	Robert Thornhill	830	12	8	2011		y
NCSC	Oxypolis rigidior (L.) Raf.	Apiaceae	Eudicots	sensu Weakley 2012	U.S.A.	NC	Pender	in savanna .18 km south of Flo Road at a point approximately 0.3km east of intersection of Flo Road and Fill Road	Very Wet Loamy Pine Savanna (sensu Schafale 2012)	occasional	8 m. msl	34deg.34'50.5" N	77deg.38'46.6" W	50	Robert Thornhill	1043	9	9	2011
NCSC	Oxypolis ternata (Nutt.) A. Heller	Apiaceae	Eudicots	sensu Weakley 2012	U.S.A.	NC	Pender	in pine savanna on northeast corner of intersection of Flo Road and Fill Road	Very Wet Loamy Pine Savanna (sensu Schafale 2012)	occasional	8 m. msl	34deg.35'0.1" N	77deg.38'59.2" W	50	Robert Thornhill	1128	7	10	2011
NCSC	Oxypolis ternata (Nutt.) A. Heller	Apiaceae	Eudicots	sensu Weakley 2012	U.S.A.	NC	Pender	in savanna .18 km south of Flo Road at a point approximately 0.3km east of intersection of Flo Road and Fill Road	Very Wet Loamy Pine Savanna (sensu Schafale 2012)	occasional	8 m. msl	34deg.34'50.5" N	77deg.38'46.6" W	50	Robert Thornhill	1070	16	9	2011
NCSC	Ptilimnium capillaceum (Michx.) Raf.	Apiaceae	Eudicots	sensu Weakley 2012	U.S.A.	NC	Pender	in savanna on east side of Alligator Lake Road, immediately south of junction with Flo Road	Very Wet Loamy Pine Savanna (sensu Schafale 2012)	infrequent	8 m. msl	34deg.34'54.2" N	77deg.38'38.5" W	50	Robert Thornhill	622	21	7	2011		y
NCSC	Ptilimnium capillaceum (Michx.) Raf.	Apiaceae	Eudicots	sensu Weakley 2012	U.S.A.	NC	Pender	boggy area in powerline right-of-way, immediately east of hunting lodge on Williams Road	disturbed open area in powerline right-of-way	frequent	7 m. msl	34deg.35'56.8" N	77deg.39'56.5" W	10	Robert Thornhill	1375	11	6	2012			boggy area in powerline cut immediately east of hunting lodge
NCSC	Tiedemannia filiformis (Walter) Feist & S.R. Downie ssp. filiformis	Apiaceae	Eudicots	sensu Weakley 2012	U.S.A.	NC	Pender	in savanna on east side of Alligator Lake Road, immediately south of junction with Flo Road	Very Wet Loamy Pine Savanna (sensu Schafale 2012)		8 m. msl	34deg.34'54.2" N	77deg.38'38.5" W	50	Robert Thornhill	983	26	8	2011
NCSC	Tiedemannia filiformis (Walter) Feist & S.R. Downie ssp. filiformis	Apiaceae	Eudicots	sensu Weakley 2012	U.S.A.	NC	Pender	in large savanna immediately south of intersection of Flo Road and Fill Road	Wet Loamy Pine Savanna (sensu Schafale 2012)	frequent	8 m. msl	34deg.34'54.7" N	77deg.39'9.0" W	100	Robert Thornhill	742	3	8	2011		y
NCSC	Tiedemannia filiformis (Walter) Feist & S.R. Downie ssp. filiformis	Apiaceae	Eudicots	sensu Weakley 2012	U.S.A.	NC	Pender	in large savanna immediately south of intersection of Flo Road and Fill Road	Wet Loamy Pine Savanna (sensu Schafale 2012)	frequent	8 m. msl	34deg.34'54.7" N	77deg.39'9.0" W	100	Robert Thornhill	833	12	8	2011
NCSC	Tiedemannia filiformis (Walter) Feist & S.R. Downie ssp. filiformis	Apiaceae	Eudicots	sensu Weakley 2012	U.S.A.	NC	Pender	in large savanna immediately south of intersection of Flo Road and Fill Road	Wet Loamy Pine Savanna (sensu Schafale 2012)	frequent	8 m. msl	34deg.34'54.7" N	77deg.39'9.0" W	100	Robert Thornhill	1039	9	9	2011
NCSC	Asclepias lanceolata Walter	Apocynaceae	Eudicots	sensu Weakley 2012	U.S.A.	NC	Pender	in savanna .18 km south of Flo Road at a point approximately 0.3km east of intersection of Flo Road and Fill Road	Very Wet Loamy Pine Savanna (sensu Schafale 2012)	occasional	8 m. msl	34deg.34'50.5" N	77deg.38'46.6" W	50	Robert Thornhill	423	9	6	2011
NCSC	Asclepias lanceolata Walter	Apocynaceae	Eudicots	sensu Weakley 2012	U.S.A.	NC	Pender	in savanna on east side of Alligator Lake Road, immediately south of junction with Flo Road	Very Wet Loamy Pine Savanna (sensu Schafale 2012)	occasional	8 m. msl	34deg.34'54.2" N	77deg.38'38.5" W	50	Robert Thornhill	1	21	8	2010
NCSC	Asclepias lanceolata Walter	Apocynaceae	Eudicots	sensu Weakley 2012	U.S.A.	NC	Pender	in savanna on east side of Alligator Lake Road, immediately south of junction with Flo Road	Very Wet Loamy Pine Savanna (sensu Schafale 2012)	occasional	8 m. msl	34deg.34'54.2" N	77deg.38'38.5" W	50	Robert Thornhill	1	21	8	2010
NCSC	Asclepias lanceolata Walter	Apocynaceae	Eudicots	sensu Weakley 2012	U.S.A.	NC	Pender	in large savanna immediately south of intersection of Flo Road and Fill Road	Wet Loamy Pine Savanna (sensu Schafale 2012)	occasional	8 m. msl	34deg.34'54.7" N	77deg.39'9.0" W	100	Robert Thornhill	378	31	5	2011		y
NCSC	Asclepias longifolia Michx.	Apocynaceae	Eudicots	sensu Weakley 2012	U.S.A.	NC	Pender	in savanna on east side of Alligator Lake Road, immediately south of junction with Flo Road	Very Wet Loamy Pine Savanna (sensu Schafale 2012)		8 m. msl	34deg.34'54.2" N	77deg.38'38.5" W	50	Robert Thornhill	249	15	5	2011		y
NCSC	Asclepias longifolia Michx.	Apocynaceae	Eudicots	sensu Weakley 2012	U.S.A.	NC	Pender	in large savanna immediately south of intersection of Flo Road and Fill Road	Wet Loamy Pine Savanna (sensu Schafale 2012)	infrequent	8 m. msl	34deg.34'54.7" N	77deg.39'9.0" W	100	Robert Thornhill	355	30	5	2011
NCSC	Asclepias longifolia Michx.	Apocynaceae	Eudicots	sensu Weakley 2012	U.S.A.	NC	Pender	in savanna immediately south of Flo Road, approximately 0.3km east of intersection of Flo Road and Fill Road	Wet Loamy Pine Savanna (sensu Schafale 2012)	infrequent	8 m. msl	34deg.34'56.3" N	77deg.38'48.6" W	50	Robert Thornhill	278	15	5	2011
NCSC	Asclepias pedicellata Walter	Apocynaceae	Eudicots	sensu Weakley 2012	U.S.A.	NC	Pender		Wet Pine Flatwoods (Typic subtype ) sensu Schafale 2012	rare				50	Robert Thornhill	1311	3	6	2012		y
NCSC	Ilex coriacea (Pursh) Chapm.	Aquifoliaceae	Eudicots	sensu Weakley 2012	U.S.A.	NC	Pender	in pine savannas along Flo Road, approximately 0.4-1.2 km southeast of junction with Half Moon Road	Sandy Pine Savanna (Rush Featherling subtype) sensu Schafale 2012		9 m. msl	34deg.35'11.9" N	77deg.39'45.9" W	400	Robert Thornhill	309	15	5	2011			sandy ridge north of the fork in Mule Pen Road
NCSC	Ilex coriacea (Pursh) Chapm.	Aquifoliaceae	Eudicots	sensu Weakley 2012	U.S.A.	NC	Pender	in Spodosol savanna on east side of Half Moon Road, 0.5-1.5 km southwest of intersection of Half Moon Road and Flo Road	Sandy Pine Savanna (Typic subtype) sensu Schafale 2012		9 m. msl	34deg.35'15.7" N	77deg.40'16.0" W	500	Robert Thornhill	261	15	5	2011		y
NCSC	Ilex coriacea (Pursh) Chapm.	Aquifoliaceae	Eudicots	sensu Weakley 2012	U.S.A.	NC	Pender	in Spodosol savanna on east side of Half Moon Road, 0.5-1.5 km southwest of intersection of Half Moon Road and Flo Road	Sandy Pine Savanna (Typic subtype) sensu Schafale 2012		9 m. msl	34deg.35'15.7" N	77deg.40'16.0" W	500	Robert Thornhill	261	15	5	2011		y
NCSC	Ilex glabra (L.) A. Gray	Aquifoliaceae	Eudicots	sensu Weakley 2012	U.S.A.	NC	Pender	in pine savannas along Flo Road, approximately 0.4-1.2 km southeast of junction with Half Moon Road	Sandy Pine Savanna (Rush Featherling subtype) sensu Schafale 2012		9 m. msl	34deg.35'11.9" N	77deg.39'45.9" W	400	Robert Thornhill	186	22	4	2011
NCSC	Ilex glabra (L.) A. Gray	Aquifoliaceae	Eudicots	sensu Weakley 2012	U.S.A.	NC	Pender	in pine savannas along Flo Road, approximately 0.4-1.2 km southeast of junction with Half Moon Road	Sandy Pine Savanna (Rush Featherling subtype) sensu Schafale 2012		9 m. msl	34deg.35'11.9" N	77deg.39'45.9" W	400	Robert Thornhill	237	6	5	2011
NCSC	Ilex glabra (L.) A. Gray	Aquifoliaceae	Eudicots	sensu Weakley 2012	U.S.A.	NC	Pender	in savanna .18 km south of Flo Road at a point approximately 0.3km east of intersection of Flo Road and Fill Road	Very Wet Loamy Pine Savanna (sensu Schafale 2012)		8 m. msl	34deg.34'50.5" N	77deg.38'46.6" W	50	Robert Thornhill	135	16	4	2011
NCSC	Ilex glabra (L.) A. Gray	Aquifoliaceae	Eudicots	sensu Weakley 2012	U.S.A.	NC	Pender	in Spodosol savanna on east side of Half Moon Road, 0.5-1.5 km southwest of intersection of Half Moon Road and Flo Road	Sandy Pine Savanna (Typic subtype) sensu Schafale 2012		9 m. msl	34deg.35'15.7" N	77deg.40'16.0" W	500	Robert Thornhill	171	22	4	2011
NCSC	Ilex glabra (L.) A. Gray	Aquifoliaceae	Eudicots	sensu Weakley 2012	U.S.A.	NC	Pender	in large savanna immediately south of intersection of Flo Road and Fill Road	Wet Loamy Pine Savanna (sensu Schafale 2012)		8 m. msl	34deg.34'54.7" N	77deg.39'9.0" W	100	Robert Thornhill	43	16	10	2010
NCSC	Ilex myrtifolia Walter	Aquifoliaceae	Eudicots	sensu Weakley 2012	U.S.A.	NC	Pender	in savanna .18 km south of Flo Road at a point approximately 0.3km east of intersection of Flo Road and Fill Road	Very Wet Loamy Pine Savanna (sensu Schafale 2012)	infrequent	8 m. msl	34deg.34'50.5" N	77deg.38'46.6" W	50	Robert Thornhill	435	9	6	2011
NCSC	Ilex myrtifolia Walter	Aquifoliaceae	Eudicots	sensu Weakley 2012	U.S.A.	NC	Pender	in savanna .18 km south of Flo Road at a point approximately 0.3km east of intersection of Flo Road and Fill Road	Very Wet Loamy Pine Savanna (sensu Schafale 2012)		8 m. msl	34deg.34'50.5" N	77deg.38'46.6" W	50	Robert Thornhill	1185	23	10	2011
NCSC	Ilex myrtifolia Walter	Aquifoliaceae	Eudicots	sensu Weakley 2012	U.S.A.	NC	Pender	in Spodosol savanna on east side of Half Moon Road, 0.5-1.5 km southwest of intersection of Half Moon Road and Flo Road	Sandy Pine Savanna (Typic subtype) sensu Schafale 2012		9 m. msl	34deg.35'15.7" N	77deg.40'16.0" W	500	Robert Thornhill	271	15	5	2011
NCSC	Ilex myrtifolia Walter	Aquifoliaceae	Eudicots	sensu Weakley 2012	U.S.A.	NC	Pender	in large savanna immediately south of intersection of Flo Road and Fill Road	Wet Loamy Pine Savanna (sensu Schafale 2012)	infrequent	8 m. msl	34deg.34'54.7" N	77deg.39'9.0" W	100	Robert Thornhill	284	15	5	2011
NCSC	Ilex opaca Aiton var. opaca	Aquifoliaceae	Eudicots	sensu Weakley 2012	U.S.A.	NC	Pender	in pine savannas along Flo Road, approximately 0.4-1.2 km southeast of junction with Half Moon Road	Sandy Pine Savanna (Rush Featherling subtype) sensu Schafale 2012		9 m. msl	34deg.35'11.9" N	77deg.39'45.9" W	400	Robert Thornhill	97	20	3	2011		y
NCSC	Ambrosia artemisiifolia L.	Asteraceae	Eudicots	sensu Weakley 2012	U.S.A.	NC	Pender	approximately 130 meters south of hunting lodge, adjacent to powerline right-of-way	disturbed roadside	infrequent	8 m. msl	34deg.35'53.6" N	77deg.40'1.4" W	20	Robert Thornhill	1030	9	9	2011			south of hunting lodge, near powerline cut
NCSC	Anthemis arvensis L.	Asteraceae	Eudicots	sensu Weakley 2012	U.S.A.	NC	Pender	approximately 130 meters south of hunting lodge, adjacent to powerline right-of-way	disturbed roadside	rare	8 m. msl	34deg.35'53.6" N	77deg.40'1.4" W	20	Robert Thornhill	1379	11	6	2012			approximately 250 yards south of lodge, along edge of powerline cut
NCSC	Arnoglossum ovatum (Walter) H. Rob. var. lanceolatum (Nutt.) D.B. Ward	Asteraceae	Eudicots	sensu Weakley 2012	U.S.A.	NC	Pender		Very Wet Loamy Pine Savanna (sensu Schafale 2012)	rare				50	Robert Thornhill	943	26	8	2011
NCSC	Baccharis halimifolia L.	Asteraceae	Eudicots	sensu Weakley 2012	U.S.A.	NC	Pender	around dog pens on Williams Road, approximately .25 km southwest of hunting lodge	weedy roadside	infrequent	8 m. msl	34deg.35'52.9" N	77deg.40'7.3" W	20	Robert Thornhill	1433	11	7	2012			around dog pens on Williams Road
NCSC	Balduina uniflora Nutt.	Asteraceae	Eudicots	sensu Weakley 2012	U.S.A.	NC	Pender	in savanna .18 km south of Flo Road at a point approximately 0.3km east of intersection of Flo Road and Fill Road	Very Wet Loamy Pine Savanna (sensu Schafale 2012)	occasional	8 m. msl	34deg.34'50.5" N	77deg.38'46.6" W	50	Robert Thornhill	870	12	8	2011		y
NCSC	Balduina uniflora Nutt.	Asteraceae	Eudicots	sensu Weakley 2012	U.S.A.	NC	Pender	in savanna .18 km south of Flo Road at a point approximately 0.3km east of intersection of Flo Road and Fill Road	Very Wet Loamy Pine Savanna (sensu Schafale 2012)	occasional	8 m. msl	34deg.34'50.5" N	77deg.38'46.6" W	50	Robert Thornhill	870	12	8	2011		y
NCSC	Bigelowia nudata (Michx.) DC. var. nudata	Asteraceae	Eudicots	sensu Weakley 2012	U.S.A.	NC	Pender	in savanna .18 km south of Flo Road at a point approximately 0.3km east of intersection of Flo Road and Fill Road	Very Wet Loamy Pine Savanna (sensu Schafale 2012)	frequent	8 m. msl	34deg.34'50.5" N	77deg.38'46.6" W	50	Robert Thornhill	1082	16	9	2011
NCSC	Bigelowia nudata (Michx.) DC. var. nudata	Asteraceae	Eudicots	sensu Weakley 2012	U.S.A.	NC	Pender	in savanna on east side of Alligator Lake Road, immediately south of junction with Flo Road	Very Wet Loamy Pine Savanna (sensu Schafale 2012)	frequent	8 m. msl	34deg.34'54.2" N	77deg.38'38.5" W	50	Robert Thornhill	1081	16	9	2011
NCSC	Bigelowia nudata (Michx.) DC. var. nudata	Asteraceae	Eudicots	sensu Weakley 2012	U.S.A.	NC	Pender	in large savanna immediately south of intersection of Flo Road and Fill Road	Wet Loamy Pine Savanna (sensu Schafale 2012)	frequent	8 m. msl	34deg.34'54.7" N	77deg.39'9.0" W	100	Robert Thornhill	750	3	8	2011		y
NCSC	Bigelowia nudata (Michx.) DC. var. nudata	Asteraceae	Eudicots	sensu Weakley 2012	U.S.A.	NC	Pender	in savanna immediately south of Flo Road, approximately 0.3km east of intersection of Flo Road and Fill Road	Wet Loamy Pine Savanna (sensu Schafale 2012)	frequent	8 m. msl	34deg.34'56.3" N	77deg.38'48.6" W	50	Robert Thornhill	967	26	8	2011		y
NCSC	Carphephorus bellidifolius (Michx.) Torr. & A. Gray	Asteraceae	Eudicots	sensu Weakley 2012	U.S.A.	NC	Pender	just north of Indian Grave Road, approximately .35 km southeast of junction with powerline right-of-way	Mesic Pine Savanna (Coastal Plain subtype) sensu Schafale 2012	rare	9 m. msl	34deg.34'55.1" N	77deg.41'11.6" W	20	Robert Thornhill	1542	14	9	2012		y	just north of Indian Grave Road, approximately .35 km southeast of junction with powerline right-of-way
NCSC	Carphephorus tomentosus (Michx.) Torr. & A. Gray	Asteraceae	Eudicots	sensu Weakley 2012	U.S.A.	NC	Pender	in Spodosol savanna on east side of Half Moon Road, 0.5-1.5 km southwest of intersection of Half Moon Road and Flo Road	Sandy Pine Savanna (Typic subtype) sensu Schafale 2012	occasional	9 m. msl	34deg.35'15.7" N	77deg.40'16.0" W	500	Robert Thornhill	1120	25	9	2011
NCSC	Carphephorus tomentosus (Michx.) Torr. & A. Gray	Asteraceae	Eudicots	sensu Weakley 2012	U.S.A.	NC	Pender	in flatwoods south of Long Ridge Road, approximately .45 km southwest of junction with Flo Road	sandy roadside	occasional	9 m. msl	34deg.36'32.7" N	77deg.41'18.7" W	50	Robert Thornhill	1000	2	9	2011		y	on ridge in northwest corner of property
NCSC	Carphephorus tomentosus (Michx.) Torr. & A. Gray	Asteraceae	Eudicots	sensu Weakley 2012	U.S.A.	NC	Pender	in ridge approximately .2 km north and then .1 km west from fork in Mule Pen Road (i.e., 2 km west of junction with Williams Road)	Wet Pine Flatwoods (Typic subtype ) sensu Schafale 2012	occasional	8 m. msl	34deg.35'41.0" N	77deg.42'25.8" W	50	Robert Thornhill	1519	14	8	2012		y	in flatwood ridge north of junction of Williams Road and Mule Pen Road
NCSC	Chaptalia tomentosa Vent.	Asteraceae	Eudicots	sensu Weakley 2012	U.S.A.	NC	Pender	in savanna .18 km south of Flo Road at a point approximately 0.3km east of intersection of Flo Road and Fill Road	Very Wet Loamy Pine Savanna (sensu Schafale 2012)		8 m. msl	34deg.34'50.5" N	77deg.38'46.6" W	50	Robert Thornhill	87	20	3	2011		y
NCSC	Chaptalia tomentosa Vent.	Asteraceae	Eudicots	sensu Weakley 2012	U.S.A.	NC	Pender	in savanna .18 km south of Flo Road at a point approximately 0.3km east of intersection of Flo Road and Fill Road	Very Wet Loamy Pine Savanna (sensu Schafale 2012)		8 m. msl	34deg.34'50.5" N	77deg.38'46.6" W	50	Robert Thornhill	87	20	3	2011		y
NCSC	Chaptalia tomentosa Vent.	Asteraceae	Eudicots	sensu Weakley 2012	U.S.A.	NC	Pender	in large savanna immediately south of intersection of Flo Road and Fill Road	Wet Loamy Pine Savanna (sensu Schafale 2012)		8 m. msl	34deg.34'54.7" N	77deg.39'9.0" W	100	Robert Thornhill	94	20	3	2011
NCSC	Cirsium horridulum Michx. var. horridulum	Asteraceae	Eudicots	sensu Weakley 2012	U.S.A.	NC	Pender	around dog pens on Williams Road, approximately .25 km southwest of hunting lodge	weedy roadside	occasional	8 m. msl	34deg.35'52.9" N	77deg.40'7.3" W	20	Robert Thornhill	245	15	5	2011			food plot north of Alligator Lake Road
NCSC	Cirsium horridulum Michx. var. vittatum (Small) R.W. Long	Asteraceae	Eudicots	sensu Weakley 2012	U.S.A.	NC	Pender	in savanna on east side of Alligator Lake Road, immediately south of junction with Flo Road	Very Wet Loamy Pine Savanna (sensu Schafale 2012)	occasional	8 m. msl	34deg.34'54.2" N	77deg.38'38.5" W	50	Robert Thornhill	377	31	5	2011		y
NCSC	Cirsium lecontei Torr. & A. Gray	Asteraceae	Eudicots	sensu Weakley 2012	U.S.A.	NC	Pender		sandy roadside	rare				20	Robert Thornhill	1454	26	7	2012		y
NCSC	Cirsium virginianum (L.) Michx.	Asteraceae	Eudicots	sensu Weakley 2012	U.S.A.	NC	Pender	in pine savanna on northeast corner of intersection of Flo Road and Fill Road	Very Wet Loamy Pine Savanna (sensu Schafale 2012)	occasional	8 m. msl	34deg.35'0.1" N	77deg.38'59.2" W	50	Robert Thornhill	923	19	8	2011		y
NCSC	Cirsium virginianum (L.) Michx.	Asteraceae	Eudicots	sensu Weakley 2012	U.S.A.	NC	Pender	at northern edge of pine savanna on northeast side Flo Road, approximately 1 km southeast of junction with Half Moon Road	Very Wet Loamy Pine Savanna (sensu Schafale 2012)	occasional	8 m. msl	34deg.35'4.6" N	77deg.39'31.2" W	50	Robert Thornhill	945	26	8	2011
NCSC	Conyza canadensis (L.) Cronquist var. pusilla (Nutt.) Cronquist	Asteraceae	Eudicots	sensu Weakley 2012	U.S.A.	NC	Pender	in food plot northwest of intersection of Alligator Lake Road and Flo Road	weedy open area (food plot)	occasional	8 m. msl	34deg.34'59.0" N	77deg.38'46.7" W	100	Robert Thornhill	1460	26	7	2012			in food plot north of Alligator Lake Road
NCSC	Conyza canadensis (L.) Cronquist var. pusilla (Nutt.) Cronquist	Asteraceae	Eudicots	sensu Weakley 2012	U.S.A.	NC	Pender	along Flo Road, approximately .12 km south of hunting lodge	sandy roadside	occasional	8 m. msl	34deg.35'55.7" N	77deg.40'3.3" W	5	Robert Thornhill	992	2	9	2011			on Williams Road, just south of lodge
NCSC	Coreopsis falcata F.E. Boynton	Asteraceae	Eudicots	sensu Weakley 2012	U.S.A.	NC	Pender	in savanna on east side of Alligator Lake Road, immediately south of junction with Flo Road	Very Wet Loamy Pine Savanna (sensu Schafale 2012)		8 m. msl	34deg.34'54.2" N	77deg.38'38.5" W	50	Robert Thornhill	219	1	5	2011
NCSC	Coreopsis falcata F.E. Boynton	Asteraceae	Eudicots	sensu Weakley 2012	U.S.A.	NC	Pender	in savanna on east side of Alligator Lake Road, immediately south of junction with Flo Road	Very Wet Loamy Pine Savanna (sensu Schafale 2012)	frequent	8 m. msl	34deg.34'54.2" N	77deg.38'38.5" W	50	Robert Thornhill	367	30	5	2011		y
NCSC	Coreopsis falcata F.E. Boynton	Asteraceae	Eudicots	sensu Weakley 2012	U.S.A.	NC	Pender	in Spodosol savanna on east side of Half Moon Road, 0.5-1.5 km southwest of intersection of Half Moon Road and Flo Road	Sandy Pine Savanna (Typic subtype) sensu Schafale 2012	frequent	9 m. msl	34deg.35'15.7" N	77deg.40'16.0" W	500	Robert Thornhill	392	31	5	2011
NCSC	Coreopsis falcata F.E. Boynton	Asteraceae	Eudicots	sensu Weakley 2012	U.S.A.	NC	Pender	in large savanna immediately south of intersection of Flo Road and Fill Road	Wet Loamy Pine Savanna (sensu Schafale 2012)	frequent	8 m. msl	34deg.34'54.7" N	77deg.39'9.0" W	100	Robert Thornhill	352	30	5	2011
NCSC	Coreopsis falcata F.E. Boynton	Asteraceae	Eudicots	sensu Weakley 2012	U.S.A.	NC	Pender	in large savanna immediately south of intersection of Flo Road and Fill Road	Wet Loamy Pine Savanna (sensu Schafale 2012)	frequent	8 m. msl	34deg.34'54.7" N	77deg.39'9.0" W	100	Robert Thornhill	352	30	5	2011
NCSC	Coreopsis falcata F.E. Boynton	Asteraceae	Eudicots	sensu Weakley 2012	U.S.A.	NC	Pender	in savanna immediately south of Flo Road, approximately 0.3km east of intersection of Flo Road and Fill Road	Wet Loamy Pine Savanna (sensu Schafale 2012)	frequent	8 m. msl	34deg.34'56.3" N	77deg.38'48.6" W	50	Robert Thornhill	368	30	5	2011
NCSC	Coreopsis linifolia Nutt.	Asteraceae	Eudicots	sensu Weakley 2012	U.S.A.	NC	Pender	in savanna on east side of Alligator Lake Road, immediately south of junction with Flo Road	Very Wet Loamy Pine Savanna (sensu Schafale 2012)		8 m. msl	34deg.34'54.2" N	77deg.38'38.5" W	50	Robert Thornhill	6	21	8	2010
NCSC	Coreopsis linifolia Nutt.	Asteraceae	Eudicots	sensu Weakley 2012	U.S.A.	NC	Pender	in savanna on east side of Alligator Lake Road, immediately south of junction with Flo Road	Very Wet Loamy Pine Savanna (sensu Schafale 2012)		8 m. msl	34deg.34'54.2" N	77deg.38'38.5" W	50	Robert Thornhill	6	21	8	2010
NCSC	Coreopsis linifolia Nutt.	Asteraceae	Eudicots	sensu Weakley 2012	U.S.A.	NC	Pender	in savanna on east side of Alligator Lake Road, immediately south of junction with Flo Road	Very Wet Loamy Pine Savanna (sensu Schafale 2012)	occasional	8 m. msl	34deg.34'54.2" N	77deg.38'38.5" W	50	Robert Thornhill	841	12	8	2011		y
NCSC	Coreopsis linifolia Nutt.	Asteraceae	Eudicots	sensu Weakley 2012	U.S.A.	NC	Pender	in savanna on east side of Alligator Lake Road, immediately south of junction with Flo Road	Very Wet Loamy Pine Savanna (sensu Schafale 2012)	occasional	8 m. msl	34deg.34'54.2" N	77deg.38'38.5" W	50	Robert Thornhill	976	26	8	2011		y
NCSC	Coreopsis linifolia Nutt.	Asteraceae	Eudicots	sensu Weakley 2012	U.S.A.	NC	Pender	in savanna on east side of Alligator Lake Road, immediately south of junction with Flo Road	Very Wet Loamy Pine Savanna (sensu Schafale 2012)	occasional	8 m. msl	34deg.34'54.2" N	77deg.38'38.5" W	50	Robert Thornhill	978	26	8	2011
NCSC	Coreopsis linifolia Nutt.	Asteraceae	Eudicots	sensu Weakley 2012	U.S.A.	NC	Pender	in savanna on east side of Alligator Lake Road, immediately south of junction with Flo Road	Very Wet Loamy Pine Savanna (sensu Schafale 2012)	occasional	8 m. msl	34deg.34'54.2" N	77deg.38'38.5" W	50	Robert Thornhill	979	26	8	2011
NCSC	Coreopsis linifolia Nutt.	Asteraceae	Eudicots	sensu Weakley 2012	U.S.A.	NC	Pender	in Spodosol savanna on east side of Half Moon Road, 0.5-1.5 km southwest of intersection of Half Moon Road and Flo Road	Sandy Pine Savanna (Typic subtype) sensu Schafale 2012		9 m. msl	34deg.35'15.7" N	77deg.40'16.0" W	500	Robert Thornhill	38	21	8	2010
NCSC	Coreopsis linifolia Nutt.	Asteraceae	Eudicots	sensu Weakley 2012	U.S.A.	NC	Pender	in large savanna immediately south of intersection of Flo Road and Fill Road	Wet Loamy Pine Savanna (sensu Schafale 2012)		8 m. msl	34deg.34'54.7" N	77deg.39'9.0" W	100	Robert Thornhill	875	12	8	2011
NCSC	Coreopsis linifolia Nutt.	Asteraceae	Eudicots	sensu Weakley 2012	U.S.A.	NC	Pender	in large savanna immediately south of intersection of Flo Road and Fill Road	Wet Loamy Pine Savanna (sensu Schafale 2012)	frequent	8 m. msl	34deg.34'54.7" N	77deg.39'9.0" W	100	Robert Thornhill	1044	9	9	2011
NCSC	Coreopsis species 1 (sensu Wealkey 2012)	Asteraceae	Eudicots	sensu Weakley 2012	U.S.A.	NC	Pender		Very Wet Loamy Pine Savanna (sensu Schafale 2012)	infrequent				50	Robert Thornhill	1171	23	10	2011		y
NCSC	Elephantopus nudatus A. Gray	Asteraceae	Eudicots	sensu Weakley 2012	U.S.A.	NC	Pender	in large savanna immediately south of intersection of Flo Road and Fill Road	Wet Loamy Pine Savanna (sensu Schafale 2012)	occasional	8 m. msl	34deg.34'54.7" N	77deg.39'9.0" W	100	Robert Thornhill	1045	9	9	2011
NCSC	Elephantopus nudatus A. Gray	Asteraceae	Eudicots	sensu Weakley 2012	U.S.A.	NC	Pender	in large savanna immediately south of intersection of Flo Road and Fill Road	Wet Loamy Pine Savanna (sensu Schafale 2012)	occasional	8 m. msl	34deg.34'54.7" N	77deg.39'9.0" W	100	Robert Thornhill	1086	16	9	2011
NCSC	Erechtites hieraciifolius (L.) Raf. ex DC.	Asteraceae	Eudicots	sensu Weakley 2012	U.S.A.	NC	Pender	in borrow pit along roadside edge of savanna on Flo Road, approximately .8 km southeast of junction with Half Moon Road	borrow pit in pine savanna (Sandy Pine Savanna (Rush Featherling subtype) sensu Schafale 2012)	rare	9 m. msl	34deg.35'8.2" N	77deg.39'42.4" W	50	Robert Thornhill	938	26	8	2011		y
NCSC	Erechtites hieraciifolius (L.) Raf. ex DC.	Asteraceae	Eudicots	sensu Weakley 2012	U.S.A.	NC	Pender	around dog pens on Williams Road, approximately .25 km southwest of hunting lodge	weedy roadside	infrequent	8 m. msl	34deg.35'52.9" N	77deg.40'7.3" W	20	Robert Thornhill	1370	11	6	2012			around dog pens on Williams Road, just south of lodge
NCSC	Erigeron quercifolius Lam.	Asteraceae	Eudicots	sensu Weakley 2012	U.S.A.	NC	Pender	along Flo Road at junction with powerline cut	sandy roadside	occasional	8 m. msl	34deg.35'46.6" N	77deg.40'10.2" W	5	Robert Thornhill	1445	11	7	2012			south side of Flo Road at juncture with powerline cut
NCSC	Erigeron quercifolius Lam.	Asteraceae	Eudicots	sensu Weakley 2012	U.S.A.	NC	Pender	in food plot northwest of intersection of Alligator Lake Road and Flo Road	weedy open area (food plot)	occasional	8 m. msl	34deg.34'59.0" N	77deg.38'46.7" W	100	Robert Thornhill	1284	2	5	2012			food plot north of intersection of Flo Road and Alligator Lake Road
NCSC	Erigeron vernus (L.) Torr. & A. Gray	Asteraceae	Eudicots	sensu Weakley 2012	U.S.A.	NC	Pender	in savanna on east side of Alligator Lake Road, immediately south of junction with Flo Road	Very Wet Loamy Pine Savanna (sensu Schafale 2012)		8 m. msl	34deg.34'54.2" N	77deg.38'38.5" W	50	Robert Thornhill	112	16	4	2011		y
NCSC	Erigeron vernus (L.) Torr. & A. Gray	Asteraceae	Eudicots	sensu Weakley 2012	U.S.A.	NC	Pender	in savanna on east side of Alligator Lake Road, immediately south of junction with Flo Road	Very Wet Loamy Pine Savanna (sensu Schafale 2012)		8 m. msl	34deg.34'54.2" N	77deg.38'38.5" W	50	Robert Thornhill	217	1	5	2011
NCSC	Erigeron vernus (L.) Torr. & A. Gray	Asteraceae	Eudicots	sensu Weakley 2012	U.S.A.	NC	Pender	in Spodosol savanna on east side of Half Moon Road, 0.5-1.5 km southwest of intersection of Half Moon Road and Flo Road	Sandy Pine Savanna (Typic subtype) sensu Schafale 2012		9 m. msl	34deg.35'15.7" N	77deg.40'16.0" W	500	Robert Thornhill	177	22	4	2011
NCSC	Erigeron vernus (L.) Torr. & A. Gray	Asteraceae	Eudicots	sensu Weakley 2012	U.S.A.	NC	Pender	in Spodosol savanna on east side of Half Moon Road, 0.5-1.5 km southwest of intersection of Half Moon Road and Flo Road	Sandy Pine Savanna (Typic subtype) sensu Schafale 2012		9 m. msl	34deg.35'15.7" N	77deg.40'16.0" W	500	Robert Thornhill	177	22	4	2011
NCSC	Erigeron vernus (L.) Torr. & A. Gray	Asteraceae	Eudicots	sensu Weakley 2012	U.S.A.	NC	Pender	in large savanna immediately south of intersection of Flo Road and Fill Road	Wet Loamy Pine Savanna (sensu Schafale 2012)		8 m. msl	34deg.34'54.7" N	77deg.39'9.0" W	100	Robert Thornhill	213	1	5	2011
NCSC	Erigeron vernus (L.) Torr. & A. Gray	Asteraceae	Eudicots	sensu Weakley 2012	U.S.A.	NC	Pender	in large savanna immediately south of intersection of Flo Road and Fill Road	Wet Loamy Pine Savanna (sensu Schafale 2012)	frequent	8 m. msl	34deg.34'54.7" N	77deg.39'9.0" W	100	Robert Thornhill	766	3	8	2011
NCSC	Eupatorium capillifolium (Lam.) Small	Asteraceae	Eudicots	sensu Weakley 2012	U.S.A.	NC	Pender	in pine savanna on northeast corner of intersection of Flo Road and Fill Road	Very Wet Loamy Pine Savanna (sensu Schafale 2012)	rare	8 m. msl	34deg.35'0.1" N	77deg.38'59.2" W	50	Robert Thornhill	1143	7	10	2011
NCSC	Eupatorium capillifolium (Lam.) Small	Asteraceae	Eudicots	sensu Weakley 2012	U.S.A.	NC	Pender	at northern edge of pine savanna on northeast side Flo Road, approximately 1 km southeast of junction with Half Moon Road	Very Wet Loamy Pine Savanna (sensu Schafale 2012)	rare	8 m. msl	34deg.35'4.6" N	77deg.39'31.2" W	50	Robert Thornhill	952	26	8	2011		y
NCSC	Eupatorium leucolepis (DC.) Torr. & A. Gray	Asteraceae	Eudicots	sensu Weakley 2012	U.S.A.	NC	Pender	in pine savanna on northeast corner of intersection of Flo Road and Fill Road	Very Wet Loamy Pine Savanna (sensu Schafale 2012)	frequent	8 m. msl	34deg.35'0.1" N	77deg.38'59.2" W	50	Robert Thornhill	925	19	8	2011		y
NCSC	Eupatorium leucolepis (DC.) Torr. & A. Gray	Asteraceae	Eudicots	sensu Weakley 2012	U.S.A.	NC	Pender	in small pine savanna on south side of Flo Road, approximately .1 km west of junction with Alligator Lake Road	Very Wet Loamy Pine Savanna (sensu Schafale 2012)	frequent	9 m. msl	34deg.34'58.0" N	77deg.38'41.0" W	20	Robert Thornhill	828	12	8	2011
NCSC	Eupatorium leucolepis (DC.) Torr. & A. Gray	Asteraceae	Eudicots	sensu Weakley 2012	U.S.A.	NC	Pender	in small pine savanna on south side of Flo Road, approximately .1 km west of junction with Alligator Lake Road	Very Wet Loamy Pine Savanna (sensu Schafale 2012)	frequent	9 m. msl	34deg.34'58.0" N	77deg.38'41.0" W	20	Robert Thornhill	1213	28	10	2011
NCSC	Eupatorium leucolepis (DC.) Torr. & A. Gray	Asteraceae	Eudicots	sensu Weakley 2012	U.S.A.	NC	Pender	in savanna on east side of Alligator Lake Road, immediately south of junction with Flo Road	Very Wet Loamy Pine Savanna (sensu Schafale 2012)	occasional	8 m. msl	34deg.34'54.2" N	77deg.38'38.5" W	50	Robert Thornhill	982	26	8	2011
NCSC	Eupatorium pilosum Walter	Asteraceae	Eudicots	sensu Weakley 2012	U.S.A.	NC	Pender	at northern edge of pine savanna on northeast side Flo Road, approximately 1 km southeast of junction with Half Moon Road	Very Wet Loamy Pine Savanna (sensu Schafale 2012)	infrequent	8 m. msl	34deg.35'4.6" N	77deg.39'31.2" W	50	Robert Thornhill	947	26	8	2011		y
NCSC	Eupatorium pilosum Walter	Asteraceae	Eudicots	sensu Weakley 2012	U.S.A.	NC	Pender	in ridge approximately .2 km north and then .1 km west from fork in Mule Pen Road (i.e., 2 km west of junction with Williams Road)	Wet Pine Flatwoods (Typic subtype ) sensu Schafale 2012	occasional	8 m. msl	34deg.35'41.0" N	77deg.42'25.8" W	50	Robert Thornhill	1520	14	8	2012			in flatwood ridge north of junction of Williams Road and Mule Pen Road
NCSC	Eupatorium recurvans Small	Asteraceae	Eudicots	sensu Weakley 2012	U.S.A.	NC	Pender	in savanna immediately south of Flo Road, approximately 0.3km east of intersection of Flo Road and Fill Road	Wet Loamy Pine Savanna (sensu Schafale 2012)	occasional; unusual specimen (pappus > 4.0 mm long)	8 m. msl	34deg.34'56.3" N	77deg.38'48.6" W	50	Robert Thornhill	1146	7	10	2011
NCSC	Eupatorium recurvans Small	Asteraceae	Eudicots	sensu Weakley 2012	U.S.A.	NC	Pender	in pine savannas along Flo Road, approximately 0.4-1.2 km southeast of junction with Half Moon Road	Sandy Pine Savanna (Rush Featherling subtype) sensu Schafale 2012	infrequent	9 m. msl	34deg.35'11.9" N	77deg.39'45.9" W	400	Robert Thornhill	1206	28	10	2011		y
NCSC	Eupatorium recurvans Small	Asteraceae	Eudicots	sensu Weakley 2012	U.S.A.	NC	Pender	in large savanna immediately south of intersection of Flo Road and Fill Road	Wet Loamy Pine Savanna (sensu Schafale 2012)		8 m. msl	34deg.34'54.7" N	77deg.39'9.0" W	100	Robert Thornhill	1122	25	9	2011		y
NCSC	Eupatorium recurvans Small	Asteraceae	Eudicots	sensu Weakley 2012	U.S.A.	NC	Pender	in large savanna immediately south of intersection of Flo Road and Fill Road	Wet Loamy Pine Savanna (sensu Schafale 2012)	infrequent	8 m. msl	34deg.34'54.7" N	77deg.39'9.0" W	100	Robert Thornhill	1237	6	11	2011
NCSC	Eupatorium rotundifolium L.	Asteraceae	Eudicots	sensu Weakley 2012	U.S.A.	NC	Pender	in large savanna immediately south of intersection of Flo Road and Fill Road	Wet Loamy Pine Savanna (sensu Schafale 2012)		8 m. msl	34deg.34'54.7" N	77deg.39'9.0" W	100	Robert Thornhill	759	3	8	2011		y
NCSC	Eurybia compacta G.L. Nesom	Asteraceae	Eudicots	sensu Weakley 2012	U.S.A.	NC	Pender	in savanna on east side of Alligator Lake Road, immediately south of junction with Flo Road	Very Wet Loamy Pine Savanna (sensu Schafale 2012)	frequent	8 m. msl	34deg.34'54.2" N	77deg.38'38.5" W	50	Robert Thornhill	969	26	8	2011
NCSC	Eurybia compacta G.L. Nesom	Asteraceae	Eudicots	sensu Weakley 2012	U.S.A.	NC	Pender	in large savanna immediately south of intersection of Flo Road and Fill Road	Wet Loamy Pine Savanna (sensu Schafale 2012)	infrequent	8 m. msl	34deg.34'54.7" N	77deg.39'9.0" W	100	Robert Thornhill	50	16	10	2010
NCSC	Eurybia compacta G.L. Nesom	Asteraceae	Eudicots	sensu Weakley 2012	U.S.A.	NC	Pender	in savanna immediately south of Flo Road, approximately 0.3km east of intersection of Flo Road and Fill Road	Wet Loamy Pine Savanna (sensu Schafale 2012)	occasional	8 m. msl	34deg.34'56.3" N	77deg.38'48.6" W	50	Robert Thornhill	1522	14	8	2012
NCSC	Eurybia paludosa (Aiton) G.L. Nesom	Asteraceae	Eudicots	sensu Weakley 2012	U.S.A.	NC	Pender	in pine savanna on northeast corner of intersection of Flo Road and Fill Road	Very Wet Loamy Pine Savanna (sensu Schafale 2012)	frequent	8 m. msl	34deg.35'0.1" N	77deg.38'59.2" W	50	Robert Thornhill	924	19	8	2011		y
NCSC	Eurybia paludosa (Aiton) G.L. Nesom	Asteraceae	Eudicots	sensu Weakley 2012	U.S.A.	NC	Pender	in pine savannas along Flo Road, approximately 0.4-1.2 km southeast of junction with Half Moon Road	Sandy Pine Savanna (Rush Featherling subtype) sensu Schafale 2012	frequent	9 m. msl	34deg.35'11.9" N	77deg.39'45.9" W	400	Robert Thornhill	1209	28	10	2011
NCSC	Eurybia paludosa (Aiton) G.L. Nesom	Asteraceae	Eudicots	sensu Weakley 2012	U.S.A.	NC	Pender	in large savanna immediately south of intersection of Flo Road and Fill Road	Wet Loamy Pine Savanna (sensu Schafale 2012)	frequent	8 m. msl	34deg.34'54.7" N	77deg.39'9.0" W	100	Robert Thornhill	102	16	10	2011
NCSC	Eurybia paludosa (Aiton) G.L. Nesom	Asteraceae	Eudicots	sensu Weakley 2012	U.S.A.	NC	Pender	in savanna immediately south of Flo Road, approximately 0.3km east of intersection of Flo Road and Fill Road	Wet Loamy Pine Savanna (sensu Schafale 2012)	frequent	8 m. msl	34deg.34'56.3" N	77deg.38'48.6" W	50	Robert Thornhill	1041	9	9	2011
NCSC	Euthamia caroliniana (L.) Greene ex Porter & Britton	Asteraceae	Eudicots	sensu Weakley 2012	U.S.A.	NC	Pender	in pine savanna on northeast corner of intersection of Flo Road and Fill Road	Very Wet Loamy Pine Savanna (sensu Schafale 2012)	occasional	8 m. msl	34deg.35'0.1" N	77deg.38'59.2" W	50	Robert Thornhill	1129	7	10	2011
NCSC	Euthamia caroliniana (L.) Greene ex Porter & Britton	Asteraceae	Eudicots	sensu Weakley 2012	U.S.A.	NC	Pender	in pine savannas along Flo Road, approximately 0.4-1.2 km southeast of junction with Half Moon Road	Sandy Pine Savanna (Rush Featherling subtype) sensu Schafale 2012	occasional	9 m. msl	34deg.35'11.9" N	77deg.39'45.9" W	400	Robert Thornhill	1238	6	11	2011
NCSC	Euthamia caroliniana (L.) Greene ex Porter & Britton	Asteraceae	Eudicots	sensu Weakley 2012	U.S.A.	NC	Pender	in large savanna immediately south of intersection of Flo Road and Fill Road	Wet Loamy Pine Savanna (sensu Schafale 2012)	occasional	8 m. msl	34deg.34'54.7" N	77deg.39'9.0" W	100	Robert Thornhill	1123	25	9	2011		y
NCSC	Euthamia caroliniana (L.) Greene ex Porter & Britton	Asteraceae	Eudicots	sensu Weakley 2012	U.S.A.	NC	Pender	in savanna immediately south of Flo Road, approximately 0.3km east of intersection of Flo Road and Fill Road	Wet Loamy Pine Savanna (sensu Schafale 2012)	occasional	8 m. msl	34deg.34'56.3" N	77deg.38'48.6" W	50	Robert Thornhill	1144	7	10	2011
NCSC	Facelis retusa (Lam.) Sch. Bip.	Asteraceae	Eudicots	sensu Weakley 2012	U.S.A.	NC	Pender	around dog pens on Williams Road, approximately .25 km southwest of hunting lodge	weedy roadside	occasional	8 m. msl	34deg.35'52.9" N	77deg.40'7.3" W	20	Robert Thornhill	490	10	6	2011			in food plot immediately north of Alligator Lake Road
NCSC	Gamochaeta coarctata (Willd.) Kerguélen	Asteraceae	Eudicots	sensu Weakley 2012	U.S.A.	NC	Pender	south side of Flo Road, immediately across from intersection with Fill Road	sandy roadside	infrequent	9 m. msl	34deg.34'56.9" N	77deg.39'2.7" W	5	Robert Thornhill	1403	15	6	2012			along south side of Flo Road, immediately across from intersection with Fill Road
NCSC	Gamochaeta purpurea (L.) Cabrera	Asteraceae	Eudicots	sensu Weakley 2012	U.S.A.	NC	Pender	in food plot northwest of intersection of Alligator Lake Road and Flo Road	weedy open area (food plot)	occasional	8 m. msl	34deg.34'59.0" N	77deg.38'46.7" W	100	Robert Thornhill	1276	2	5	2012
NCSC	Gamochaeta purpurea (L.) Cabrera	Asteraceae	Eudicots	sensu Weakley 2012	U.S.A.	NC	Pender	south side of Flo Road, immediately across from intersection with Fill Road	sandy roadside	occasional	9 m. msl	34deg.35'33.7" N	77deg.40'2.2" W	5	Robert Thornhill	227	6	5	2011			in road, at intersection of Half Moon Road and Flo Road
NCSC	Gamochaeta purpurea (L.) Cabrera	Asteraceae	Eudicots	sensu Weakley 2012	U.S.A.	NC	Pender	south side of Flo Road, immediately across from intersection with Fill Road	sandy roadside	occasional	9 m. msl	34deg.35'33.7" N	77deg.40'2.2" W	5	Robert Thornhill	227	6	5	2011			in road, at intersection of Half Moon Road and Flo Road
NCSC	Helenium amarum (Raf.) H. Rock var. amarum	Asteraceae	Eudicots	sensu Weakley 2012	U.S.A.	NC	Pender	along Flo Road, near intersection with Fill Road	sandy roadside margin, adjacent to pine savanna	infrequent in savannas; more common along roadside	8 m. msl	34deg.34'56.4" N	77deg.39'8.8" W	200	Robert Thornhill	920	19	8	2011
NCSC	Helenium autumnale L.	Asteraceae	Eudicots	sensu Weakley 2012	U.S.A.	NC	Pender	in savanna on east side of Alligator Lake Road, immediately south of junction with Flo Road	Very Wet Loamy Pine Savanna (sensu Schafale 2012)	infrequent	8 m. msl	34deg.34'54.2" N	77deg.38'38.5" W	50	Robert Thornhill	1550	14	9	2012
NCSC	Helenium autumnale L.	Asteraceae	Eudicots	sensu Weakley 2012	U.S.A.	NC	Pender	in savanna on east side of Alligator Lake Road, immediately south of junction with Flo Road	Very Wet Loamy Pine Savanna (sensu Schafale 2012)	infrequent	8 m. msl	34deg.34'54.2" N	77deg.38'38.5" W	50	Robert Thornhill	1087	16	9	2011
NCSC	Helenium autumnale L.	Asteraceae	Eudicots	sensu Weakley 2012	U.S.A.	NC	Pender	along Flo Road, 0.4-1.2 km southeast of junction with Half Moon Road	sandy roadside margin, adjacent to pine savanna	infrequent	9 m. msl	34deg.35'11.9" N	77deg.39'45.9" W	100	Robert Thornhill	1029	9	9	2011			roadside by savanna on Flo Road, approximately 1 mile east of intersection with Half Moon Road
NCSC	Helianthus angustifolius L.	Asteraceae	Eudicots	sensu Weakley 2012	U.S.A.	NC	Pender	in pine savanna on northeast corner of intersection of Flo Road and Fill Road	Very Wet Loamy Pine Savanna (sensu Schafale 2012)	frequent	8 m. msl	34deg.35'0.1" N	77deg.38'59.2" W	50	Robert Thornhill	1140	7	10	2011
NCSC	Helianthus angustifolius L.	Asteraceae	Eudicots	sensu Weakley 2012	U.S.A.	NC	Pender	in large savanna immediately south of intersection of Flo Road and Fill Road	Wet Loamy Pine Savanna (sensu Schafale 2012)		8 m. msl	34deg.34'54.7" N	77deg.39'9.0" W	100	Robert Thornhill	51	16	10	2010
NCSC	Helianthus angustifolius L.	Asteraceae	Eudicots	sensu Weakley 2012	U.S.A.	NC	Pender	in large savanna immediately south of intersection of Flo Road and Fill Road	Wet Loamy Pine Savanna (sensu Schafale 2012)		8 m. msl	34deg.34'54.7" N	77deg.39'9.0" W	100	Robert Thornhill	51	16	10	2010
NCSC	Helianthus angustifolius L.	Asteraceae	Eudicots	sensu Weakley 2012	U.S.A.	NC	Pender	in large savanna immediately south of intersection of Flo Road and Fill Road	Wet Loamy Pine Savanna (sensu Schafale 2012)		8 m. msl	34deg.34'54.7" N	77deg.39'9.0" W	100	Robert Thornhill	51	16	10	2010
NCSC	Helianthus angustifolius L.	Asteraceae	Eudicots	sensu Weakley 2012	U.S.A.	NC	Pender	in savanna immediately south of Flo Road, approximately 0.3km east of intersection of Flo Road and Fill Road	Wet Loamy Pine Savanna (sensu Schafale 2012)	frequent	8 m. msl	34deg.34'56.3" N	77deg.38'48.6" W	50	Robert Thornhill	1141	7	10	2011
NCSC	Helianthus heterophyllus Nutt.	Asteraceae	Eudicots	sensu Weakley 2012	U.S.A.	NC	Pender	in small pine savanna on south side of Flo Road, approximately .1 km west of junction with Alligator Lake Road	Very Wet Loamy Pine Savanna (sensu Schafale 2012)	infrequent	9 m. msl	34deg.34'58.0" N	77deg.38'41.0" W	20	Robert Thornhill	1090	16	9	2011		y
NCSC	Helianthus heterophyllus Nutt.	Asteraceae	Eudicots	sensu Weakley 2012	U.S.A.	NC	Pender	in savanna .18 km south of Flo Road at a point approximately 0.3km east of intersection of Flo Road and Fill Road	Very Wet Loamy Pine Savanna (sensu Schafale 2012)	infrequent	8 m. msl	34deg.34'50.5" N	77deg.38'46.6" W	50	Robert Thornhill	989	2	9	2011		y
NCSC	Hieracium gronovii L.	Asteraceae	Eudicots	sensu Weakley 2012	U.S.A.	NC	Pender	in flatwoods/savanna approximately 80 meters north of intersection of Alligator Lake Road and Flo Road, just east of food plot	Mesic Pine Savanna (Coastal Plain subtype) sensu Schafale 2012	infrequent	9 m. msl	34deg.35'0.8" N	77deg.38'37.7" W	50	Robert Thornhill	1549	14	9	2012			in flatwoods north of intersection of Flo Road and Alligator Lake Road, east of food plot
NCSC	Ionactis linariifolia (L.) Greene	Asteraceae	Eudicots	sensu Weakley 2012	U.S.A.	NC	Pender	in savanna on east side of Alligator Lake Road, immediately south of junction with Flo Road	Very Wet Loamy Pine Savanna (sensu Schafale 2012)	rare	8 m. msl	34deg.34'54.2" N	77deg.38'38.5" W	50	Robert Thornhill	1186	23	10	2011
NCSC	Krigia virginica (L.) Willd.	Asteraceae	Eudicots	sensu Weakley 2012	U.S.A.	NC	Pender	south side of Flo Road, immediately across from intersection with Fill Road	sandy roadside	occasional	9 m. msl	34deg.35'33.7" N	77deg.40'2.2" W	5	Robert Thornhill	240	6	5	2011			in road, at intersection of Half Moon Road and Flo Road
NCSC	Krigia virginica (L.) Willd.	Asteraceae	Eudicots	sensu Weakley 2012	U.S.A.	NC	Pender	along north side of Flo Road, approximately .2 km southeast of junction with powerline right of way	sandy roadside	occasional	8 m. msl	34deg.35'40.1" N	77deg.40'6.0" W	20	Robert Thornhill	330	26	3	2012			north side of Flo Road, approximately .2 mi east of intersection with Half Moon Road
NCSC	Liatris pilosa (Aiton) Willd.	Asteraceae	Eudicots	sensu Weakley 2012	U.S.A.	NC	Pender	in savanna on east side of Alligator Lake Road, immediately south of junction with Flo Road	Very Wet Loamy Pine Savanna (sensu Schafale 2012)		8 m. msl	34deg.34'54.2" N	77deg.38'38.5" W	50	Robert Thornhill	52	16	10	2010
NCSC	Liatris pilosa (Aiton) Willd.	Asteraceae	Eudicots	sensu Weakley 2012	U.S.A.	NC	Pender	in savanna on east side of Alligator Lake Road, immediately south of junction with Flo Road	Very Wet Loamy Pine Savanna (sensu Schafale 2012)		8 m. msl	34deg.34'54.2" N	77deg.38'38.5" W	50	Robert Thornhill	52	16	10	2010
NCSC	Liatris pilosa (Aiton) Willd.	Asteraceae	Eudicots	sensu Weakley 2012	U.S.A.	NC	Pender	in savanna on east side of Alligator Lake Road, immediately south of junction with Flo Road	Very Wet Loamy Pine Savanna (sensu Schafale 2012)	occasional (on dry sand ridge)	8 m. msl	34deg.34'54.2" N	77deg.38'38.5" W	50	Robert Thornhill	1176	23	10	2011		y
NCSC	Liatris pilosa (Aiton) Willd.	Asteraceae	Eudicots	sensu Weakley 2012	U.S.A.	NC	Pender	in savanna on east side of Alligator Lake Road, immediately south of junction with Flo Road	Very Wet Loamy Pine Savanna (sensu Schafale 2012)	occasional (on dry sand ridge)	8 m. msl	34deg.34'54.2" N	77deg.38'38.5" W	50	Robert Thornhill	1176	23	10	2011		y
NCSC	Liatris pilosa (Aiton) Willd.	Asteraceae	Eudicots	sensu Weakley 2012	U.S.A.	NC	Pender	in powerline cut, approximately .2 mi south of junction with Indian Grave Road	Mesic Pine Savanna (Coastal Plain subtype) sensu Schafale 2012	occasional (on dry sand ridge)	9 m. msl	34deg.35'1.4" N	77deg.41'10.41" W	50	Robert Thornhill	1545	14	9	2012			in powerline cut adjacent to flatwoods, .2 mi south of where Indian Grave Road crosses powerline cut
NCSC	Liatris spicata (L.) Willd. var. resinosa (Nutt.) Gaiser	Asteraceae	Eudicots	sensu Weakley 2012	U.S.A.	NC	Pender	in small pine savanna on south side of Flo Road, approximately .1 km west of junction with Alligator Lake Road	Very Wet Loamy Pine Savanna (sensu Schafale 2012)	frequent	9 m. msl	34deg.34'58.0" N	77deg.38'41.0" W	20	Robert Thornhill	829	12	8	2011
NCSC	Liatris spicata (L.) Willd. var. resinosa (Nutt.) Gaiser	Asteraceae	Eudicots	sensu Weakley 2012	U.S.A.	NC	Pender	in pine savannas along Flo Road, approximately 0.4-1.2 km southeast of junction with Half Moon Road	Sandy Pine Savanna (Rush Featherling subtype) sensu Schafale 2012	occasional	9 m. msl	34deg.35'11.9" N	77deg.39'45.9" W	400	Robert Thornhill	956	26	8	2011
NCSC	Liatris spicata (L.) Willd. var. resinosa (Nutt.) Gaiser	Asteraceae	Eudicots	sensu Weakley 2012	U.S.A.	NC	Pender	in savanna immediately south of Flo Road, approximately 0.3km east of intersection of Flo Road and Fill Road	Wet Loamy Pine Savanna (sensu Schafale 2012)	occasional	8 m. msl	34deg.34'56.3" N	77deg.38'48.6" W	50	Robert Thornhill	874	12	8	2011
NCSC	Marshallia graminifolia (Walter) Small	Asteraceae	Eudicots	sensu Weakley 2012	U.S.A.	NC	Pender	in savanna on east side of Alligator Lake Road, immediately south of junction with Flo Road	Very Wet Loamy Pine Savanna (sensu Schafale 2012)		8 m. msl	34deg.34'54.2" N	77deg.38'38.5" W	50	Robert Thornhill	5	21	8	2010		y
NCSC	Marshallia graminifolia (Walter) Small	Asteraceae	Eudicots	sensu Weakley 2012	U.S.A.	NC	Pender	in savanna on east side of Alligator Lake Road, immediately south of junction with Flo Road	Very Wet Loamy Pine Savanna (sensu Schafale 2012)		8 m. msl	34deg.34'54.2" N	77deg.38'38.5" W	50	Robert Thornhill	5	21	8	2010		y
NCSC	Marshallia graminifolia (Walter) Small	Asteraceae	Eudicots	sensu Weakley 2012	U.S.A.	NC	Pender	in savanna on east side of Alligator Lake Road, immediately south of junction with Flo Road	Very Wet Loamy Pine Savanna (sensu Schafale 2012)		8 m. msl	34deg.34'54.2" N	77deg.38'38.5" W	50	Robert Thornhill	701	21	7	2011
NCSC	Marshallia graminifolia (Walter) Small	Asteraceae	Eudicots	sensu Weakley 2012	U.S.A.	NC	Pender	in Spodosol savanna on east side of Half Moon Road, 0.5-1.5 km southwest of intersection of Half Moon Road and Flo Road	Sandy Pine Savanna (Typic subtype) sensu Schafale 2012		9 m. msl	34deg.35'15.7" N	77deg.40'16.0" W	500	Robert Thornhill	807	4	8	2011
NCSC	Marshallia graminifolia (Walter) Small	Asteraceae	Eudicots	sensu Weakley 2012	U.S.A.	NC	Pender	in large savanna immediately south of intersection of Flo Road and Fill Road	Wet Loamy Pine Savanna (sensu Schafale 2012)	frequent	8 m. msl	34deg.34'54.7" N	77deg.39'9.0" W	100	Robert Thornhill	741	3	8	2011		y
NCSC	Mikania scandens (L.) Willd.	Asteraceae	Eudicots	sensu Weakley 2012	U.S.A.	NC	Pender	in small pine savanna on south side of Flo Road, approximately .1 km west of junction with Alligator Lake Road	Very Wet Loamy Pine Savanna (sensu Schafale 2012)	occasional	9 m. msl	34deg.34'58.0" N	77deg.38'41.0" W	20	Robert Thornhill	824	12	8	2011		y
NCSC	Mikania scandens (L.) Willd.	Asteraceae	Eudicots	sensu Weakley 2012	U.S.A.	NC	Pender	in small pine savanna on south side of Flo Road, approximately .1 km west of junction with Alligator Lake Road	Very Wet Loamy Pine Savanna (sensu Schafale 2012)	occasional	9 m. msl	34deg.34'58.0" N	77deg.38'41.0" W	20	Robert Thornhill	834	12	8	2011
NCSC	Pityopsis graminifolia (Michx.) Nutt. var. latifolia (Fernald) Semple & F.D. Bowers	Asteraceae	Eudicots	sensu Weakley 2012	U.S.A.	NC	Pender	in large savanna immediately south of intersection of Flo Road and Fill Road	Wet Loamy Pine Savanna (sensu Schafale 2012)	occasional	8 m. msl	34deg.34'54.7" N	77deg.39'9.0" W	100	Robert Thornhill	1145	7	10	2011		y
NCSC	Pityopsis graminifolia (Michx.) Nutt. var. latifolia (Fernald) Semple & F.D. Bowers	Asteraceae	Eudicots	sensu Weakley 2012	U.S.A.	NC	Pender	in pine savanna on northeast corner of intersection of Flo Road and Fill Road	Very Wet Loamy Pine Savanna (sensu Schafale 2012)	frequent (particularly in drier areas)	8 m. msl	34deg.35'0.1" N	77deg.38'59.2" W	50	Robert Thornhill	922	19	8	2011
NCSC	Pityopsis graminifolia (Michx.) Nutt. var. latifolia (Fernald) Semple & F.D. Bowers	Asteraceae	Eudicots	sensu Weakley 2012	U.S.A.	NC	Pender	in savanna on east side of Alligator Lake Road, immediately south of junction with Flo Road	Very Wet Loamy Pine Savanna (sensu Schafale 2012)	frequent	8 m. msl	34deg.34'54.2" N	77deg.38'38.5" W	50	Robert Thornhill	985	26	8	2011
NCSC	Pityopsis graminifolia (Michx.) Nutt. var. latifolia (Fernald) Semple & F.D. Bowers	Asteraceae	Eudicots	sensu Weakley 2012	U.S.A.	NC	Pender	in large savanna immediately south of intersection of Flo Road and Fill Road	Wet Loamy Pine Savanna (sensu Schafale 2012)	occasional	8 m. msl	34deg.34'54.7" N	77deg.39'9.0" W	100	Robert Thornhill	761	3	8	2011		y
NCSC	Pluchea foetida (L.) DC.	Asteraceae	Eudicots	sensu FNA	U.S.A.	NC	Pender	in borrow pit at northern edge of savanna at southeast corner of Alligator Lake Road and Flo Road	borrow pit in Very Wet Loamy Pine Savanna (sensu Schafale 2012)	frequent	8 m. msl	34deg.34'54.2" N	77deg.38'38.5" W	50	Robert Thornhill	686	21	7	2011
NCSC	Pluchea foetida (L.) DC.	Asteraceae	Eudicots	sensu FNA	U.S.A.	NC	Pender	in borrow pit in savanna immediately south of Flo Road, approximately 0.3km east of intersection of Flo Road and Fill Road	borrow pit at edge of pine savanna (Wet Loamy Pine Savanna sensu Schafale 2012)	frequent	8 m. msl	34deg.34'56.3" N	77deg.38'48.6" W	50	Robert Thornhill	672	21	7	2011		y
NCSC	Pluchea foetida (L.) DC.	Asteraceae	Eudicots	sensu FNA	U.S.A.	NC	Pender	at northern edge of pine savanna on northeast side Flo Road, approximately 1 km southeast of junction with Half Moon Road	Very Wet Loamy Pine Savanna (sensu Schafale 2012)	infrequent	8 m. msl	34deg.35'4.6" N	77deg.39'31.2" W	50	Robert Thornhill	955	26	8	2011
NCSC	Prenanthes autumnalis Walter	Asteraceae	Eudicots	sensu Weakley 2012	U.S.A.	NC	Pender	in savanna on east side of Alligator Lake Road, immediately south of junction with Flo Road	Very Wet Loamy Pine Savanna (sensu Schafale 2012)	rare	8 m. msl	34deg.34'54.2" N	77deg.38'38.5" W	50	Robert Thornhill	1174	23	10	2011
NCSC	Prenanthes autumnalis Walter	Asteraceae	Eudicots	sensu Weakley 2012	U.S.A.	NC	Pender	in savanna immediately south of Flo Road, approximately 0.3km east of intersection of Flo Road and Fill Road	Wet Loamy Pine Savanna (sensu Schafale 2012)	rare	8 m. msl	34deg.34'56.3" N	77deg.38'48.6" W	50	Robert Thornhill	1232	6	11	2011
NCSC	Pseudognaphalium obtusifolium (L.) Hilliard & Burtt	Asteraceae	Eudicots	sensu Weakley 2012	U.S.A.	NC	Pender	along eastern edge of powerline cut, approximately .2 mi south of junction with Indian Grave Road	Mesic Pine Savanna (Coastal Plain subtype) sensu Schafale 2012	infrequent	9 m. msl	34deg.35'1.4" N	77deg.41'10.41" W	50	Robert Thornhill	1530	28	8	2012			at edge of powerline cut and mesic pine flatwoods, approximately .2 mi south of where Indian Grave Road crosses the powerline cut
NCSC	Pterocaulon pycnostachyum (Michx.) Elliott	Asteraceae	Eudicots	sensu Weakley 2012	U.S.A.	NC	Pender	in powerline cut approximately 50 meters north of Indian Grave Road	disturbed pine savanna	occasional	9 m. msl	34deg.35'9.3" N	77deg.41'1.5" W	50	Robert Thornhill	387	31	5	2011			in powerline cut, just north of Indian Grave Road
NCSC	Pterocaulon pycnostachyum (Michx.) Elliott	Asteraceae	Eudicots	sensu Weakley 2012	U.S.A.	NC	Pender	spodosol ridge approximately 0.4 km west of Flo Road at a point 0.6 km northwest of intersection of Flo Road and Williams Road	Wet Pine Flatwoods (Typic subtype ) sensu Schafale 2012	occasional	9 m. msl	34deg.36'10.5" N	77deg.40'42.3" W	100	Robert Thornhill	1296	22	5	2012			(spodosol?) ridge northwest of Patterson Road, just before 2nd gate
NCSC	Pyrrhopappus carolinianus (Walter) DC.	Asteraceae	Eudicots	sensu Weakley 2012	U.S.A.	NC	Pender	in savanna on east side of Alligator Lake Road, immediately south of junction with Flo Road	Very Wet Loamy Pine Savanna (sensu Schafale 2012)		8 m. msl	34deg.34'54.2" N	77deg.38'38.5" W	50	Robert Thornhill	481	10	6	2011		y
NCSC	Pyrrhopappus carolinianus (Walter) DC.	Asteraceae	Eudicots	sensu Weakley 2012	U.S.A.	NC	Pender	in savanna on east side of Alligator Lake Road, immediately south of junction with Flo Road	Very Wet Loamy Pine Savanna (sensu Schafale 2012)	infrequent	8 m. msl	34deg.34'54.2" N	77deg.38'38.5" W	50	Robert Thornhill	657	14	7	2011
NCSC	Sericocarpus linifolius (L.) Britton, Sterns & Poggenb.	Asteraceae	Eudicots	sensu Weakley 2012	U.S.A.	NC	Pender	in dry ridge approximately .2 km north and then .1 km west from fork in Mule Pen Road (i.e., 2 km west of junction with Williams Road)	Mesic Pine Savanna (Coastal Plain subtype) sensu Schafale 2012	infrequent	8 m. msl	34deg.35'41.0" N	77deg.42'25.8" W	50	Robert Thornhill	1003	2	9	2011		y
NCSC	Sericocarpus linifolius (L.) Britton, Sterns & Poggenb.	Asteraceae	Eudicots	sensu Weakley 2012	U.S.A.	NC	Pender	in dry ridge approximately .2 km north and then .1 km west from fork in Mule Pen Road (i.e., 2 km west of junction with Williams Road)	Mesic Pine Savanna (Coastal Plain subtype) sensu Schafale 2012	infrequent	8 m. msl	34deg.35'41.0" N	77deg.42'25.8" W	50	Robert Thornhill	1003	2	9	2011		y
NCSC	Solidago altissima L. var. altissima	Asteraceae	Eudicots	sensu Weakley 2012	U.S.A.	NC	Pender	in powerline right-of-way, approximately .1 km north of Indian Grave Road	powerline right-of-way	infrequent	9 m. msl	34deg.35'40.1" N	77deg.40'6.0" W	20	Robert Thornhill	1552	14	9	2012		y	in powerline cut, approximately .2 mi north of Indian Grave Road
NCSC	Solidago gracillima Torr. & A. Gray	Asteraceae	Eudicots	sensu Weakley 2012	U.S.A.	NC	Pender	in pine savanna on northeast corner of intersection of Flo Road and Fill Road	Very Wet Loamy Pine Savanna (sensu Schafale 2012)	occasional	8 m. msl	34deg.35'0.1" N	77deg.38'59.2" W	50	Robert Thornhill	1130	7	10	2011
NCSC	Solidago gracillima Torr. & A. Gray	Asteraceae	Eudicots	sensu Weakley 2012	U.S.A.	NC	Pender	at northern edge of pine savanna on northeast side Flo Road, approximately 1 km southeast of junction with Half Moon Road	Very Wet Loamy Pine Savanna (sensu Schafale 2012)	occasional	8 m. msl	34deg.35'4.6" N	77deg.39'31.2" W	50	Robert Thornhill	942	26	8	2011		y
NCSC	Solidago gracillima Torr. & A. Gray	Asteraceae	Eudicots	sensu Weakley 2012	U.S.A.	NC	Pender	at northern edge of pine savanna on northeast side Flo Road, approximately 1 km southeast of junction with Half Moon Road	Very Wet Loamy Pine Savanna (sensu Schafale 2012)	occasional	8 m. msl	34deg.35'4.6" N	77deg.39'31.2" W	50	Robert Thornhill	942	26	8	2011		y
NCSC	Solidago gracillima Torr. & A. Gray	Asteraceae	Eudicots	sensu Weakley 2012	U.S.A.	NC	Pender	in savanna on east side of Alligator Lake Road, immediately south of junction with Flo Road	Very Wet Loamy Pine Savanna (sensu Schafale 2012)	occasional	8 m. msl	34deg.34'54.2" N	77deg.38'38.5" W	50	Robert Thornhill	1078	16	9	2011		y
NCSC	Solidago gracillima Torr. & A. Gray	Asteraceae	Eudicots	sensu Weakley 2012	U.S.A.	NC	Pender	in savanna on east side of Alligator Lake Road, immediately south of junction with Flo Road	Very Wet Loamy Pine Savanna (sensu Schafale 2012)	occasional	8 m. msl	34deg.34'54.2" N	77deg.38'38.5" W	50	Robert Thornhill	1078	16	9	2011		y
NCSC	Solidago gracillima Torr. & A. Gray	Asteraceae	Eudicots	sensu Weakley 2012	U.S.A.	NC	Pender	in savanna immediately south of Flo Road, approximately 0.3km east of intersection of Flo Road and Fill Road	Wet Loamy Pine Savanna (sensu Schafale 2012)	occasional	8 m. msl	34deg.34'56.3" N	77deg.38'48.6" W	50	Robert Thornhill	1236	6	11	2011
NCSC	Solidago puberula Nutt. var. pulverulenta (Nutt.) Chapm.	Asteraceae	Eudicots	sensu Weakley 2012	U.S.A.	NC	Pender	in large savanna immediately south of intersection of Flo Road and Fill Road	Wet Loamy Pine Savanna (sensu Schafale 2012)	rare	8 m. msl	34deg.34'54.7" N	77deg.39'9.0" W	100	Robert Thornhill	1038	9	9	2011		y
NCSC	Solidago pulchra Small	Asteraceae	Eudicots	sensu Weakley 2012	U.S.A.	NC	Pender	in pine savannas along Flo Road, approximately 0.4-1.2 km southeast of junction with Half Moon Road	Sandy Pine Savanna (Rush Featherling subtype) sensu Schafale 2012	frequent	9 m. msl	34deg.35'11.9" N	77deg.39'45.9" W	400	Robert Thornhill	1036	9	9	2011
NCSC	Solidago pulchra Small	Asteraceae	Eudicots	sensu Weakley 2012	U.S.A.	NC	Pender	in pine savannas along Flo Road, approximately 0.4-1.2 km southeast of junction with Half Moon Road	Sandy Pine Savanna (Rush Featherling subtype) sensu Schafale 2012	frequent	9 m. msl	34deg.35'11.9" N	77deg.39'45.9" W	400	Robert Thornhill	1495	26	7	2012
NCSC	Solidago pulchra Small	Asteraceae	Eudicots	sensu Weakley 2012	U.S.A.	NC	Pender	in Spodosol savanna on east side of Half Moon Road, 0.5-1.5 km southwest of intersection of Half Moon Road and Flo Road	Sandy Pine Savanna (Typic subtype) sensu Schafale 2012		9 m. msl	34deg.35'15.7" N	77deg.40'16.0" W	500	Robert Thornhill	39	21	8	2010
NCSC	Solidago pulchra Small	Asteraceae	Eudicots	sensu Weakley 2012	U.S.A.	NC	Pender	in Spodosol savanna on east side of Half Moon Road, 0.5-1.5 km southwest of intersection of Half Moon Road and Flo Road	Sandy Pine Savanna (Typic subtype) sensu Schafale 2012		9 m. msl	34deg.35'15.7" N	77deg.40'16.0" W	500	Robert Thornhill	40	21	8	2010
NCSC	Solidago pulchra Small	Asteraceae	Eudicots	sensu Weakley 2012	U.S.A.	NC	Pender	in Spodosol savanna on east side of Half Moon Road, 0.5-1.5 km southwest of intersection of Half Moon Road and Flo Road	Sandy Pine Savanna (Typic subtype) sensu Schafale 2012		9 m. msl	34deg.35'15.7" N	77deg.40'16.0" W	500	Robert Thornhill	40	21	8	2010
NCSC	Solidago pulchra Small	Asteraceae	Eudicots	sensu Weakley 2012	U.S.A.	NC	Pender	in Spodosol savanna on east side of Half Moon Road, 0.5-1.5 km southwest of intersection of Half Moon Road and Flo Road	Sandy Pine Savanna (Typic subtype) sensu Schafale 2012	frequent	9 m. msl	34deg.35'15.7" N	77deg.40'16.0" W	500	Robert Thornhill	909	19	8	2011
NCSC	Solidago stricta Aiton	Asteraceae	Eudicots	sensu Weakley 2012	U.S.A.	NC	Pender	in savanna immediately south of Flo Road, approximately 0.3km east of intersection of Flo Road and Fill Road	Wet Loamy Pine Savanna (sensu Schafale 2012)	occasional	8 m. msl	34deg.34'56.3" N	77deg.38'48.6" W	50	Robert Thornhill	1136	7	10	2011
NCSC	Symphyotrichum dumosum (L.) G.L. Nesom	Asteraceae	Eudicots	sensu FNA	U.S.A.	NC	Pender	in pine savanna on northeast corner of intersection of Flo Road and Fill Road	Very Wet Loamy Pine Savanna (sensu Schafale 2012)	occasional	8 m. msl	34deg.35'0.1" N	77deg.38'59.2" W	50	Robert Thornhill	1131	7	10	2011		y
NCSC	Symphyotrichum dumosum (L.) G.L. Nesom	Asteraceae	Eudicots	sensu FNA	U.S.A.	NC	Pender	in small pine savanna on south side of Flo Road, approximately .1 km west of junction with Alligator Lake Road	Very Wet Loamy Pine Savanna (sensu Schafale 2012)	occasional	9 m. msl	34deg.34'58.0" N	77deg.38'41.0" W	20	Robert Thornhill	1212	28	10	2011
NCSC	Symphyotrichum dumosum (L.) G.L. Nesom	Asteraceae	Eudicots	sensu FNA	U.S.A.	NC	Pender	in small pine savanna on south side of Flo Road, approximately .1 km west of junction with Alligator Lake Road	Very Wet Loamy Pine Savanna (sensu Schafale 2012)	occasional	9 m. msl	34deg.34'58.0" N	77deg.38'41.0" W	20	Robert Thornhill	1211	28	10	2011
NCSC	Symphyotrichum dumosum (L.) G.L. Nesom	Asteraceae	Eudicots	sensu FNA	U.S.A.	NC	Pender	in pine savannas along Flo Road, approximately 0.4-1.2 km southeast of junction with Half Moon Road	Sandy Pine Savanna (Rush Featherling subtype) sensu Schafale 2012	infrequent	9 m. msl	34deg.35'11.9" N	77deg.39'45.9" W	400	Robert Thornhill	1210	28	10	2011
NCSC	Symphyotrichum dumosum (L.) G.L. Nesom	Asteraceae	Eudicots	sensu FNA	U.S.A.	NC	Pender	in savanna .18 km south of Flo Road at a point approximately 0.3km east of intersection of Flo Road and Fill Road	Very Wet Loamy Pine Savanna (sensu Schafale 2012)	occasional	8 m. msl	34deg.34'50.5" N	77deg.38'46.6" W	50	Robert Thornhill	1184	23	10	2011
NCSC	Symphyotrichum dumosum (L.) G.L. Nesom	Asteraceae	Eudicots	sensu FNA	U.S.A.	NC	Pender	in savanna on east side of Alligator Lake Road, immediately south of junction with Flo Road	Very Wet Loamy Pine Savanna (sensu Schafale 2012)	occasional	8 m. msl	34deg.34'54.2" N	77deg.38'38.5" W	50	Robert Thornhill	1170	23	10	2011
NCSC	Symphyotrichum dumosum (L.) G.L. Nesom	Asteraceae	Eudicots	sensu FNA	U.S.A.	NC	Pender	in large savanna immediately south of intersection of Flo Road and Fill Road	Wet Loamy Pine Savanna (sensu Schafale 2012)		8 m. msl	34deg.34'54.7" N	77deg.39'9.0" W	100	Robert Thornhill	46	16	10	2010
NCSC	Symphyotrichum dumosum (L.) G.L. Nesom	Asteraceae	Eudicots	sensu FNA	U.S.A.	NC	Pender	in large savanna immediately south of intersection of Flo Road and Fill Road	Wet Loamy Pine Savanna (sensu Schafale 2012)		8 m. msl	34deg.34'54.7" N	77deg.39'9.0" W	100	Robert Thornhill	46	16	10	2010
NCSC	Symphyotrichum walteri (Alexander) G.L. Nesom	Asteraceae	Eudicots	sensu FNA	U.S.A.	NC	Pender	in pine savanna on northeast corner of intersection of Flo Road and Fill Road	Very Wet Loamy Pine Savanna (sensu Schafale 2012)	infrequent	8 m. msl	34deg.35'0.1" N	77deg.38'59.2" W	50	Robert Thornhill	971	26	8	2011
NCSC	Trilisa odoratissima (J.F. Gmel.) Cass.	Asteraceae	Eudicots	sensu Weakley 2012	U.S.A.	NC	Pender	in ridge approximately .2 km north and then .1 km west from fork in Mule Pen Road (i.e., 2 km west of junction with Williams Road)	Wet Pine Flatwoods (Typic subtype ) sensu Schafale 2012	occasional	8 m. msl	34deg.35'41.0" N	77deg.42'25.8" W	50	Robert Thornhill	1518	14	8	2012		y	in flatwood ridge north of junction of Williams Road and Mule Pen Road
NCSC	Trilisa paniculata (J.F. Gmel.) Cass.	Asteraceae	Eudicots	sensu Weakley 2012	U.S.A.	NC	Pender	in flatwoods circa 0.1 km east of Williams Road from a point approximately .3 km north of junction with Mule Pen Road	Wet Pine Flatwoods (Typic subtype ) sensu Schafale 2012	infrequent	7 m. msl	34deg.35'7.1" N	77deg.41'15.1" W	100	Robert Thornhill	1540	14	9	2012		y	flatwoods on east side of Williams Road, approximately .1 mi north of intersection of Williams Road and Indian Grave Road
NCSC	Betula nigra L.	Betulaceae	Eudicots	sensu Weakley 2012	U.S.A.	NC	Pender	in savanna immediately south of Flo Road, approximately 0.3km east of intersection of Flo Road and Fill Road	Wet Loamy Pine Savanna (sensu Schafale 2012)	rare	8 m. msl	34deg.34'56.3" N	77deg.38'48.6" W	50	Robert Thornhill	366	30	5	2011
NCSC	Bignonia capreolata L.	Bignoniaceae	Eudicots	sensu Weakley 2012	U.S.A.	NC	Pender	in savanna immediately south of Flo Road, approximately 0.3km east of intersection of Flo Road and Fill Road	Wet Loamy Pine Savanna (sensu Schafale 2012)	infrequent along swamp border	8 m. msl	34deg.34'56.3" N	77deg.38'48.6" W	50	Robert Thornhill	1148	7	10	2011
NCSC	Campsis radicans (L.) Seem. ex Bureau	Bignoniaceae	Eudicots	sensu Weakley 2012	U.S.A.	NC	Pender	in swamp on south side of Flo Road, approximately 1.2 km east of junction with Alligator Lake Road	swamp forest	occasional	8 m. msl	34deg.34'50.0" N	77deg.37'59.0" W	100	Robert Thornhill	1482	26	7	2012		y	in swamp on south side of Flo Road, approximately 1 mi east of intersection with Alligator Lake Road
NCSC	Lepidium didymum L.	Brassicaceae	Eudicots	sensu Weakley 2012	U.S.A.	NC	Pender	south side of Flo Road, immediately across from intersection with Fill Road	sandy roadside	infrequent	9 m. msl	34deg.34'56.9" N	77deg.39'2.7" W	5	Robert Thornhill	209	26	3	2012			south side of Flo Road, immediately across from intersection with Fill Road
NCSC	Lepidium virginicum L. ssp. virginicum	Brassicaceae	Eudicots	sensu Weakley 2012	U.S.A.	NC	Pender	in lawn around hunting lodge on Williams Road, just south of Shelter Swamp Creek	moist lawn	occasional	8 m. msl	34deg.35'57.5" N	77deg.39'58.8" W	10	Robert Thornhill	491	10	6	2011
NCSC	Raphanus raphanistrum L. ssp. raphanistrum	Brassicaceae	Eudicots	sensu Weakley 2012	U.S.A.	NC	Pender	in food plot on northeast side of Flo Road, approximately .5 km southeast of intersection of Flo Road and Half Moon Road	disturbed open area (food plot)	infrequent	9 m. msl	34deg.34'56.9" N	77deg.39'50.6" W	50	Robert Thornhill	1341	3	6	2012			food plot on north side of Flo Road, approximately .3 mi southeast of intersection of Flo Road and Half Moon Road
NCSC	Lobelia canbyi A. Gray	Campanulaceae	Eudicots	sensu Weakley 2012	U.S.A.	NC	Pender	in savanna on east side of Alligator Lake Road, immediately south of junction with Flo Road	Very Wet Loamy Pine Savanna (sensu Schafale 2012)	frequent	8 m. msl	34deg.34'54.2" N	77deg.38'38.5" W	50	Robert Thornhill	840	12	8	2011
NCSC	Lobelia canbyi A. Gray	Campanulaceae	Eudicots	sensu Weakley 2012	U.S.A.	NC	Pender	in Spodosol savanna on east side of Half Moon Road, 0.5-1.5 km southwest of intersection of Half Moon Road and Flo Road	Sandy Pine Savanna (Typic subtype) sensu Schafale 2012		9 m. msl	34deg.35'15.7" N	77deg.40'16.0" W	500	Robert Thornhill	34	21	8	2010
NCSC	Lobelia canbyi A. Gray	Campanulaceae	Eudicots	sensu Weakley 2012	U.S.A.	NC	Pender	in Spodosol savanna on east side of Half Moon Road, 0.5-1.5 km southwest of intersection of Half Moon Road and Flo Road	Sandy Pine Savanna (Typic subtype) sensu Schafale 2012		9 m. msl	34deg.35'15.7" N	77deg.40'16.0" W	500	Robert Thornhill	34	21	8	2010
NCSC	Lobelia canbyi A. Gray	Campanulaceae	Eudicots	sensu Weakley 2012	U.S.A.	NC	Pender	in Spodosol savanna on east side of Half Moon Road, 0.5-1.5 km southwest of intersection of Half Moon Road and Flo Road	Sandy Pine Savanna (Typic subtype) sensu Schafale 2012		9 m. msl	34deg.35'15.7" N	77deg.40'16.0" W	500	Robert Thornhill	804	4	8	2011
NCSC	Lobelia canbyi A. Gray	Campanulaceae	Eudicots	sensu Weakley 2012	U.S.A.	NC	Pender	in large savanna immediately south of intersection of Flo Road and Fill Road	Wet Loamy Pine Savanna (sensu Schafale 2012)		8 m. msl	34deg.34'54.7" N	77deg.39'9.0" W	100	Robert Thornhill	49	16	10	2010
NCSC	Lobelia canbyi A. Gray	Campanulaceae	Eudicots	sensu Weakley 2012	U.S.A.	NC	Pender	in large savanna immediately south of intersection of Flo Road and Fill Road	Wet Loamy Pine Savanna (sensu Schafale 2012)		8 m. msl	34deg.34'54.7" N	77deg.39'9.0" W	100	Robert Thornhill	49	16	10	2010
NCSC	Lobelia canbyi A. Gray	Campanulaceae	Eudicots	sensu Weakley 2012	U.S.A.	NC	Pender	in large savanna immediately south of intersection of Flo Road and Fill Road	Wet Loamy Pine Savanna (sensu Schafale 2012)	occasional	8 m. msl	34deg.34'54.7" N	77deg.39'9.0" W	100	Robert Thornhill	740	3	8	2011
NCSC	Lobelia canbyi A. Gray	Campanulaceae	Eudicots	sensu Weakley 2012	U.S.A.	NC	Pender	in savanna immediately south of Flo Road, approximately 0.3km east of intersection of Flo Road and Fill Road	Wet Loamy Pine Savanna (sensu Schafale 2012)	occasional	8 m. msl	34deg.34'56.3" N	77deg.38'48.6" W	50	Robert Thornhill	873	12	8	2011
NCSC	Lobelia glandulosa Walter	Campanulaceae	Eudicots	sensu Weakley 2012	U.S.A.	NC	Pender	in pine savanna on northeast corner of intersection of Flo Road and Fill Road	Very Wet Loamy Pine Savanna (sensu Schafale 2012)	frequent	8 m. msl	34deg.35'0.1" N	77deg.38'59.2" W	50	Robert Thornhill	921	19	8	2011
NCSC	Lobelia glandulosa Walter	Campanulaceae	Eudicots	sensu Weakley 2012	U.S.A.	NC	Pender	in Spodosol savanna on east side of Half Moon Road, 0.5-1.5 km southwest of intersection of Half Moon Road and Flo Road	Sandy Pine Savanna (Typic subtype) sensu Schafale 2012		9 m. msl	34deg.35'15.7" N	77deg.40'16.0" W	500	Robert Thornhill	35	21	8	2010
NCSC	Lobelia nuttallii Schult.	Campanulaceae	Eudicots	sensu Weakley 2012	U.S.A.	NC	Pender	in savanna .18 km south of Flo Road at a point approximately 0.3km east of intersection of Flo Road and Fill Road	Very Wet Loamy Pine Savanna (sensu Schafale 2012)	frequent	8 m. msl	34deg.34'50.5" N	77deg.38'46.6" W	50	Robert Thornhill	427	9	6	2011
NCSC	Lobelia nuttallii Schult.	Campanulaceae	Eudicots	sensu Weakley 2012	U.S.A.	NC	Pender	in savanna on east side of Alligator Lake Road, immediately south of junction with Flo Road	Very Wet Loamy Pine Savanna (sensu Schafale 2012)		8 m. msl	34deg.34'54.2" N	77deg.38'38.5" W	50	Robert Thornhill	3	21	8	2010
NCSC	Lobelia nuttallii Schult.	Campanulaceae	Eudicots	sensu Weakley 2012	U.S.A.	NC	Pender	in Spodosol savanna on east side of Half Moon Road, 0.5-1.5 km southwest of intersection of Half Moon Road and Flo Road	Sandy Pine Savanna (Typic subtype) sensu Schafale 2012	frequent	9 m. msl	34deg.35'15.7" N	77deg.40'16.0" W	500	Robert Thornhill	479	10	6	2011
NCSC	Lobelia nuttallii Schult.	Campanulaceae	Eudicots	sensu Weakley 2012	U.S.A.	NC	Pender	in Spodosol savanna on east side of Half Moon Road, 0.5-1.5 km southwest of intersection of Half Moon Road and Flo Road	Sandy Pine Savanna (Typic subtype) sensu Schafale 2012	frequent	9 m. msl	34deg.35'15.7" N	77deg.40'16.0" W	500	Robert Thornhill	488	10	6	2011
NCSC	Lobelia nuttallii Schult.	Campanulaceae	Eudicots	sensu Weakley 2012	U.S.A.	NC	Pender	in Spodosol savanna on east side of Half Moon Road, 0.5-1.5 km southwest of intersection of Half Moon Road and Flo Road	Sandy Pine Savanna (Typic subtype) sensu Schafale 2012	frequent	9 m. msl	34deg.35'15.7" N	77deg.40'16.0" W	500	Robert Thornhill	526	21	6	2011
NCSC	Lobelia nuttallii Schult.	Campanulaceae	Eudicots	sensu Weakley 2012	U.S.A.	NC	Pender	in large savanna immediately south of intersection of Flo Road and Fill Road	Wet Loamy Pine Savanna (sensu Schafale 2012)	frequent	8 m. msl	34deg.34'54.7" N	77deg.39'9.0" W	100	Robert Thornhill	337	30	5	2011		y
NCSC	Arenaria leptoclados (Rchb.) Guss.	Caryophyllaceae	Eudicots	sensu Weakley 2012	U.S.A.	NC	Pender	south side of Flo Road, immediately across from intersection with Fill Road	sandy roadside	rare	9 m. msl	34deg.35'21.4" N	77deg.39'2.7" W	5	Robert Thornhill	349	26	3	2012			south side of Flo Road, immediately across from intersection with Fill Road
NCSC	Cerastium glomeratum Thuill.	Caryophyllaceae	Eudicots	sensu Weakley 2012	U.S.A.	NC	Pender	south side of Flo Road, immediately across from intersection with Fill Road	sandy roadside	infrequent	9 m. msl	34deg.34'56.9" N	77deg.39'2.7" W	5	Robert Thornhill	253	26	3	2012			south side of Flo Road, immediately across from intersection with Fill Road
NCSC	Sagina decumbens (Elliott) Torr. & A. Gray	Caryophyllaceae	Eudicots	sensu Weakley 2012	U.S.A.	NC	Pender	south side of Flo Road, immediately across from intersection with Fill Road	sandy roadside	infrequent	9 m. msl	34deg.34'56.9" N	77deg.39'2.7" W	5	Robert Thornhill	334	26	3	2012			south side of Flo Road, immediately across from intersection with Fill Road
NCSC	Euonymus americanus L.	Celastraceae	Eudicots	sensu Weakley 2012	U.S.A.	NC	Pender	in swamp on south side of Flo Road, approximately 1.2 km east of junction with Alligator Lake Road	swamp forest	occasional	8 m. msl	34deg.34'50.0" N	77deg.37'59.0" W	100	Robert Thornhill	1489	26	7	2012			in swamp on south side of Flo Road, approximately 1 mi east of intersection with Alligator Lake Road
NCSC	Lechea minor L.	Cistaceae	Eudicots	sensu Weakley 2012	U.S.A.	NC	Pender	in flatwoods/savanna approximately 80 meters north of intersection of Alligator Lake Road and Flo Road, just east of food plot	Mesic Pine Savanna (Coastal Plain subtype) sensu Schafale 2012	infrequent	9 m. msl	34deg.35'0.8" N	77deg.38'37.7" W	50	Robert Thornhill	1551	14	9	2012			in flatwoods north of intersection of Flo Road and Alligator Lake Road, east of food plot
NCSC	Lechea pulchella Raf. var. ramosissima (Hodgdon) Sorrie & Weakley	Cistaceae	Eudicots	sensu Weakley 2012	U.S.A.	NC	Pender	in large savanna immediately south of intersection of Flo Road and Fill Road	Wet Loamy Pine Savanna (sensu Schafale 2012)		8 m. msl	34deg.34'54.7" N	77deg.39'9.0" W	100	Robert Thornhill	623	14	7	2011
NCSC	Lechea pulchella Raf. var. ramosissima (Hodgdon) Sorrie & Weakley	Cistaceae	Eudicots	sensu Weakley 2012	U.S.A.	NC	Pender	in large savanna immediately south of intersection of Flo Road and Fill Road	Wet Loamy Pine Savanna (sensu Schafale 2012)		8 m. msl	34deg.34'54.7" N	77deg.39'9.0" W	100	Robert Thornhill	751	3	8	2011
NCSC	Clethra alnifolia L.	Clethraceae	Eudicots	sensu Weakley 2012	U.S.A.	NC	Pender	in pine savannas along Flo Road, approximately 0.4-1.2 km southeast of junction with Half Moon Road	Sandy Pine Savanna (Rush Featherling subtype) sensu Schafale 2012	occasional	9 m. msl	34deg.35'11.9" N	77deg.39'45.9" W	400	Robert Thornhill	585	14	7	2011		y
NCSC	Clethra alnifolia L.	Clethraceae	Eudicots	sensu Weakley 2012	U.S.A.	NC	Pender	in Spodosol savanna on east side of Half Moon Road, 0.5-1.5 km southwest of intersection of Half Moon Road and Flo Road	Sandy Pine Savanna (Typic subtype) sensu Schafale 2012	frequent	9 m. msl	34deg.35'15.7" N	77deg.40'16.0" W	500	Robert Thornhill	715	21	7	2011
NCSC	Clethra alnifolia L.	Clethraceae	Eudicots	sensu Weakley 2012	U.S.A.	NC	Pender	in large savanna immediately south of intersection of Flo Road and Fill Road	Wet Loamy Pine Savanna (sensu Schafale 2012)	occasional	8 m. msl	34deg.34'54.7" N	77deg.39'9.0" W	100	Robert Thornhill	613	14	7	2011
NCSC	Clethra alnifolia L.	Clethraceae	Eudicots	sensu Weakley 2012	U.S.A.	NC	Pender	in savanna immediately south of Flo Road, approximately 0.3km east of intersection of Flo Road and Fill Road	Wet Loamy Pine Savanna (sensu Schafale 2012)	occasional	8 m. msl	34deg.34'56.3" N	77deg.38'48.6" W	50	Robert Thornhill	670	21	7	2011
NCSC	Cuscuta gronovii Willd. ex Roem. & Schult.	Convolvulaceae	Eudicots	sensu Weakley 2012	U.S.A.	NC	Pender	in small pine savanna on south side of Flo Road, approximately .1 km west of junction with Alligator Lake Road	Very Wet Loamy Pine Savanna (sensu Schafale 2012)	rare	9 m. msl	34deg.34'58.0" N	77deg.38'41.0" W	20	Robert Thornhill	1042	9	9	2011
NCSC	Cuscuta gronovii Willd. ex Roem. & Schult.	Convolvulaceae	Eudicots	sensu Weakley 2012	U.S.A.	NC	Pender	in small pine savanna on south side of Flo Road, approximately .1 km west of junction with Alligator Lake Road	Very Wet Loamy Pine Savanna (sensu Schafale 2012)	rare	9 m. msl	34deg.34'58.0" N	77deg.38'41.0" W	20	Robert Thornhill	1085	16	9	2011
NCSC	Dichondra carolinensis Michx.	Convolvulaceae	Eudicots	sensu Weakley 2012	U.S.A.	NC	Pender	in moist lawn on east side of hunting lodge on Williams Road	moist, shady lawn	infrequent	8 m. msl	34deg.35'57.5" N	77deg.39'58.0" W	5	Robert Thornhill	1422	19	6	2012			in moist lawn on east side of hunting lodge on Williams Road
NCSC	Cornus stricta Lam.	Cornaceae	Eudicots	sensu Weakley 2012	U.S.A.	NC	Pender	in pine savannas along Flo Road, approximately 0.4-1.2 km southeast of junction with Half Moon Road	Sandy Pine Savanna (Rush Featherling subtype) sensu Schafale 2012		9 m. msl	34deg.35'11.9" N	77deg.39'45.9" W	400	Robert Thornhill	239	6	5	2011		y
NCSC	Cornus stricta Lam.	Cornaceae	Eudicots	sensu Weakley 2012	U.S.A.	NC	Pender	in swamp on south side of Flo Road, approximately 1.2 km east of junction with Alligator Lake Road	swamp forest	occasional	8 m. msl	34deg.34'50.0" N	77deg.37'59.0" W	100	Robert Thornhill	1491	26	7	2012		y	in swamp on south side of Flo Road, approximately 1 mi east of intersection with Alligator Lake Road
NCSC	Cyrilla racemiflora L.	Cyrillaceae	Eudicots	sensu Weakley 2012	U.S.A.	NC	Pender	in savanna .18 km south of Flo Road at a point approximately 0.3km east of intersection of Flo Road and Fill Road	Very Wet Loamy Pine Savanna (sensu Schafale 2012)	occasional	8 m. msl	34deg.34'50.5" N	77deg.38'46.6" W	50	Robert Thornhill	430	9	6	2011
NCSC	Cyrilla racemiflora L.	Cyrillaceae	Eudicots	sensu Weakley 2012	U.S.A.	NC	Pender	in Spodosol savanna on east side of Half Moon Road, 0.5-1.5 km southwest of intersection of Half Moon Road and Flo Road	Sandy Pine Savanna (Typic subtype) sensu Schafale 2012	occasional	9 m. msl	34deg.35'15.7" N	77deg.40'16.0" W	500	Robert Thornhill	540	21	6	2011
NCSC	Cyrilla racemiflora L.	Cyrillaceae	Eudicots	sensu Weakley 2012	U.S.A.	NC	Pender	in large savanna immediately south of intersection of Flo Road and Fill Road	Wet Loamy Pine Savanna (sensu Schafale 2012)		8 m. msl	34deg.34'54.7" N	77deg.39'9.0" W	100	Robert Thornhill	448	9	6	2011
NCSC	Cyrilla racemiflora L.	Cyrillaceae	Eudicots	sensu Weakley 2012	U.S.A.	NC	Pender	in large savanna immediately south of intersection of Flo Road and Fill Road	Wet Loamy Pine Savanna (sensu Schafale 2012)	frequent	8 m. msl	34deg.34'54.7" N	77deg.39'9.0" W	100	Robert Thornhill	614	14	7	2011
NCSC	Pyxidanthera barbulata Michx.	Diapensiaceae	Eudicots	sensu Weakley 2012	U.S.A.	NC	Pender	in pine savannas along Flo Road, approximately 0.4-1.2 km southeast of junction with Half Moon Road	Sandy Pine Savanna (Rush Featherling subtype) sensu Schafale 2012		9 m. msl	34deg.35'11.9" N	77deg.39'45.9" W	400	Robert Thornhill	81	20	3	2011
NCSC	Pyxidanthera barbulata Michx.	Diapensiaceae	Eudicots	sensu Weakley 2012	U.S.A.	NC	Pender	in Spodosol savanna on east side of Half Moon Road, 0.5-1.5 km southwest of intersection of Half Moon Road and Flo Road	Sandy Pine Savanna (Typic subtype) sensu Schafale 2012		9 m. msl	34deg.35'15.7" N	77deg.40'16.0" W	500	Robert Thornhill	83	20	3	2011		y
NCSC	Dionaea muscipula J. Ellis	Droseraceae	Eudicots	sensu Weakley 2012	U.S.A.	NC	Pender		Sandy Pine Savanna (Rush Featherling subtype) sensu Schafale 2012	occasional				400	Robert Thornhill	381	31	5	2011
NCSC	Dionaea muscipula J. Ellis	Droseraceae	Eudicots	sensu Weakley 2012	U.S.A.	NC	Pender		Sandy Pine Savanna (Typic subtype) sensu Schafale 2012	frequent				500	Robert Thornhill	383	31	5	2011
NCSC	Dionaea muscipula J. Ellis	Droseraceae	Eudicots	sensu Weakley 2012	U.S.A.	NC	Pender		Wet Loamy Pine Savanna (sensu Schafale 2012)	occasional				100	Robert Thornhill	314	30	5	2011
NCSC	Drosera brevifolia Pursh	Droseraceae	Eudicots	sensu Weakley 2012	U.S.A.	NC	Pender	in savanna on east side of Alligator Lake Road, immediately south of junction with Flo Road	Very Wet Loamy Pine Savanna (sensu Schafale 2012)		8 m. msl	34deg.34'54.2" N	77deg.38'38.5" W	50	Robert Thornhill	104	16	4	2011
NCSC	Drosera brevifolia Pursh	Droseraceae	Eudicots	sensu Weakley 2012	U.S.A.	NC	Pender	in Spodosol savanna on east side of Half Moon Road, 0.5-1.5 km southwest of intersection of Half Moon Road and Flo Road	Sandy Pine Savanna (Typic subtype) sensu Schafale 2012		9 m. msl	34deg.35'15.7" N	77deg.40'16.0" W	500	Robert Thornhill	159	22	4	2011
NCSC	Drosera capillaris Poir.	Droseraceae	Eudicots	sensu Weakley 2012	U.S.A.	NC	Pender	in pine savannas along Flo Road, approximately 0.4-1.2 km southeast of junction with Half Moon Road	Sandy Pine Savanna (Rush Featherling subtype) sensu Schafale 2012	frequent	9 m. msl	34deg.35'11.9" N	77deg.39'45.9" W	400	Robert Thornhill	411	31	5	2011
NCSC	Drosera capillaris Poir.	Droseraceae	Eudicots	sensu Weakley 2012	U.S.A.	NC	Pender	in large savanna immediately south of intersection of Flo Road and Fill Road	Wet Loamy Pine Savanna (sensu Schafale 2012)		8 m. msl	34deg.34'54.7" N	77deg.39'9.0" W	100	Robert Thornhill	292	15	5	2011
NCSC	Drosera capillaris Poir.	Droseraceae	Eudicots	sensu Weakley 2012	U.S.A.	NC	Pender	in large savanna immediately south of intersection of Flo Road and Fill Road	Wet Loamy Pine Savanna (sensu Schafale 2012)	frequent	8 m. msl	34deg.34'54.7" N	77deg.39'9.0" W	100	Robert Thornhill	371	30	5	2011
NCSC	Drosera intermedia Hayne	Droseraceae	Eudicots	sensu Weakley 2012	U.S.A.	NC	Pender	in Spodosol savanna on east side of Half Moon Road, 0.5-1.5 km southwest of intersection of Half Moon Road and Flo Road	Sandy Pine Savanna (Typic subtype) sensu Schafale 2012		9 m. msl	34deg.35'15.7" N	77deg.40'16.0" W	500	Robert Thornhill	29	21	8	2010
NCSC	Drosera intermedia Hayne	Droseraceae	Eudicots	sensu Weakley 2012	U.S.A.	NC	Pender	in Spodosol savanna on east side of Half Moon Road, 0.5-1.5 km southwest of intersection of Half Moon Road and Flo Road	Sandy Pine Savanna (Typic subtype) sensu Schafale 2012		9 m. msl	34deg.35'15.7" N	77deg.40'16.0" W	500	Robert Thornhill	29	21	8	2010
NCSC	Drosera intermedia Hayne	Droseraceae	Eudicots	sensu Weakley 2012	U.S.A.	NC	Pender	in Spodosol savanna on east side of Half Moon Road, 0.5-1.5 km southwest of intersection of Half Moon Road and Flo Road	Sandy Pine Savanna (Typic subtype) sensu Schafale 2012		9 m. msl	34deg.35'15.7" N	77deg.40'16.0" W	500	Robert Thornhill	161	22	4	2011
NCSC	Drosera intermedia Hayne	Droseraceae	Eudicots	sensu Weakley 2012	U.S.A.	NC	Pender	in savanna immediately south of Flo Road, approximately 0.3km east of intersection of Flo Road and Fill Road	Wet Loamy Pine Savanna (sensu Schafale 2012)	frequent	8 m. msl	34deg.34'56.3" N	77deg.38'48.6" W	50	Robert Thornhill	666	21	7	2011		y
NCSC	Diospyros virginiana L.	Ebenaceae	Eudicots	sensu Weakley 2012	U.S.A.	NC	Pender	in savanna on east side of Alligator Lake Road, immediately south of junction with Flo Road	Very Wet Loamy Pine Savanna (sensu Schafale 2012)	infrequent	8 m. msl	34deg.34'54.2" N	77deg.38'38.5" W	50	Robert Thornhill	709	21	7	2011
NCSC	Diospyros virginiana L.	Ebenaceae	Eudicots	sensu Weakley 2012	U.S.A.	NC	Pender	in large savanna immediately south of intersection of Flo Road and Fill Road	Wet Loamy Pine Savanna (sensu Schafale 2012)	occasional	8 m. msl	34deg.34'54.7" N	77deg.39'9.0" W	100	Robert Thornhill	283	15	5	2011		y
NCSC	Eubotrys racemosa (L.) Nutt.	Ericaceae	Eudicots	sensu Weakley 2012	U.S.A.	NC	Pender	at bridge over Shaken Creek on Williams Road, near border of Holly Shelter Game Lands	Coastal Plain Small Stream Swamp sensu Schafale 2012	occasional	6 m. msl	34deg.34'55.8" N	77deg.41'29.9" W	50	Robert Thornhill	1471	26	7	2012			at bridge over Shaken Creek on Williams Road, near border of Holly Shelter Game Lands
NCSC	Eubotrys racemosa (L.) Nutt.	Ericaceae	Eudicots	sensu Weakley 2012	U.S.A.	NC	Pender	in ridge approximately .2 km north and then .1 km west from fork in Mule Pen Road (i.e., 2 km west of junction with Williams Road)	Wet Pine Flatwoods (Typic subtype ) sensu Schafale 2012	occasional	8 m. msl	34deg.35'41.0" N	77deg.42'25.8" W	50	Robert Thornhill	1511	14	8	2012			in flatwood ridge north of junction of Williams Road and Mule Pen Road
NCSC	Eubotrys racemosa (L.) Nutt.	Ericaceae	Eudicots	sensu Weakley 2012	U.S.A.	NC	Pender	in grown-over flatwoods immediately north of Bug Ridge Road, approximately .8 km east of junction with Fill Road	Wet Pine Flatwoods (Typic subtype ) sensu Schafale 2012	occasional	9 m. msl	34deg.36'13.7" N	77deg.38'22.6" W	100	Robert Thornhill	1291	11	5	2012		y	in grown-over flatwoods off of Bug Ridge Road, just NE of intersection with SCP property boundary
NCSC	Eubotrys racemosa (L.) Nutt.	Ericaceae	Eudicots	sensu Weakley 2012	U.S.A.	NC	Pender	on west side of Williams Road, immediately across from junction with Indian Grave Road	Wet Pine Flatwoods (Typic subtype ) sensu Schafale 2012	occasional	8 m. msl	34deg.35'18.1" N	77deg.41'0.1" W	20	Robert Thornhill	1546	14	9	2012			on west side of Williams Road, across from junction with Indian Grave Road
NCSC	Gaylussacia dumosa (Andrews) Torr. & A. Gray	Ericaceae	Eudicots	sensu Weakley 2012	U.S.A.	NC	Pender	in pine savannas along Flo Road, approximately 0.4-1.2 km southeast of junction with Half Moon Road	Sandy Pine Savanna (Rush Featherling subtype) sensu Schafale 2012	frequent	9 m. msl	34deg.35'11.9" N	77deg.39'45.9" W	400	Robert Thornhill	214	1	5	2011
NCSC	Gaylussacia dumosa (Andrews) Torr. & A. Gray	Ericaceae	Eudicots	sensu Weakley 2012	U.S.A.	NC	Pender	in pine savannas along Flo Road, approximately 0.4-1.2 km southeast of junction with Half Moon Road	Sandy Pine Savanna (Rush Featherling subtype) sensu Schafale 2012		9 m. msl	34deg.35'11.9" N	77deg.39'45.9" W	400	Robert Thornhill	233	6	5	2011
NCSC	Gaylussacia dumosa (Andrews) Torr. & A. Gray	Ericaceae	Eudicots	sensu Weakley 2012	U.S.A.	NC	Pender	in pine savannas along Flo Road, approximately 0.4-1.2 km southeast of junction with Half Moon Road	Sandy Pine Savanna (Rush Featherling subtype) sensu Schafale 2012		9 m. msl	34deg.35'11.9" N	77deg.39'45.9" W	400	Robert Thornhill	592	14	7	2011		y
NCSC	Gaylussacia dumosa (Andrews) Torr. & A. Gray	Ericaceae	Eudicots	sensu Weakley 2012	U.S.A.	NC	Pender	in pine savannas along Flo Road, approximately 0.4-1.2 km southeast of junction with Half Moon Road	Sandy Pine Savanna (Rush Featherling subtype) sensu Schafale 2012	frequent	9 m. msl	34deg.35'11.9" N	77deg.39'45.9" W	400	Robert Thornhill	806	4	8	2011
NCSC	Gaylussacia dumosa (Andrews) Torr. & A. Gray	Ericaceae	Eudicots	sensu Weakley 2012	U.S.A.	NC	Pender	in Spodosol savanna on east side of Half Moon Road, 0.5-1.5 km southwest of intersection of Half Moon Road and Flo Road	Sandy Pine Savanna (Typic subtype) sensu Schafale 2012		9 m. msl	34deg.35'15.7" N	77deg.40'16.0" W	500	Robert Thornhill	165	22	4	2011
NCSC	Gaylussacia dumosa (Andrews) Torr. & A. Gray	Ericaceae	Eudicots	sensu Weakley 2012	U.S.A.	NC	Pender	in Spodosol savanna on east side of Half Moon Road, 0.5-1.5 km southwest of intersection of Half Moon Road and Flo Road	Sandy Pine Savanna (Typic subtype) sensu Schafale 2012		9 m. msl	34deg.35'15.7" N	77deg.40'16.0" W	500	Robert Thornhill	228	6	5	2011
NCSC	Gaylussacia dumosa (Andrews) Torr. & A. Gray	Ericaceae	Eudicots	sensu Weakley 2012	U.S.A.	NC	Pender	in Spodosol savanna on east side of Half Moon Road, 0.5-1.5 km southwest of intersection of Half Moon Road and Flo Road	Sandy Pine Savanna (Typic subtype) sensu Schafale 2012		9 m. msl	34deg.35'15.7" N	77deg.40'16.0" W	500	Robert Thornhill	258	15	5	2011
NCSC	Gaylussacia dumosa (Andrews) Torr. & A. Gray	Ericaceae	Eudicots	sensu Weakley 2012	U.S.A.	NC	Pender	in large savanna immediately south of intersection of Flo Road and Fill Road	Wet Loamy Pine Savanna (sensu Schafale 2012)		8 m. msl	34deg.34'54.7" N	77deg.39'9.0" W	100	Robert Thornhill	210	1	5	2011
NCSC	Gaylussacia dumosa (Andrews) Torr. & A. Gray	Ericaceae	Eudicots	sensu Weakley 2012	U.S.A.	NC	Pender	in large savanna immediately south of intersection of Flo Road and Fill Road	Wet Loamy Pine Savanna (sensu Schafale 2012)		8 m. msl	34deg.34'54.7" N	77deg.39'9.0" W	100	Robert Thornhill	210	1	5	2011
NCSC	Gaylussacia dumosa (Andrews) Torr. & A. Gray	Ericaceae	Eudicots	sensu Weakley 2012	U.S.A.	NC	Pender	in savanna immediately south of Flo Road, approximately 0.3km east of intersection of Flo Road and Fill Road	Wet Loamy Pine Savanna (sensu Schafale 2012)		8 m. msl	34deg.34'56.3" N	77deg.38'48.6" W	50	Robert Thornhill	197	1	5	2011		y
NCSC	Gaylussacia frondosa (L.) Torr. & A. Gray ex Torr.	Ericaceae	Eudicots	sensu Weakley 2012	U.S.A.	NC	Pender	in pine savannas along Flo Road, approximately 0.4-1.2 km southeast of junction with Half Moon Road	Sandy Pine Savanna (Rush Featherling subtype) sensu Schafale 2012		9 m. msl	34deg.35'11.9" N	77deg.39'45.9" W	400	Robert Thornhill	215	1	5	2011
NCSC	Gaylussacia frondosa (L.) Torr. & A. Gray ex Torr.	Ericaceae	Eudicots	sensu Weakley 2012	U.S.A.	NC	Pender	in pine savannas along Flo Road, approximately 0.4-1.2 km southeast of junction with Half Moon Road	Sandy Pine Savanna (Rush Featherling subtype) sensu Schafale 2012		9 m. msl	34deg.35'11.9" N	77deg.39'45.9" W	400	Robert Thornhill	234	6	5	2011
NCSC	Gaylussacia frondosa (L.) Torr. & A. Gray ex Torr.	Ericaceae	Eudicots	sensu Weakley 2012	U.S.A.	NC	Pender	in savanna on east side of Alligator Lake Road, immediately south of junction with Flo Road	Very Wet Loamy Pine Savanna (sensu Schafale 2012)		8 m. msl	34deg.34'54.2" N	77deg.38'38.5" W	50	Robert Thornhill	120	16	4	2011		y
NCSC	Gaylussacia frondosa (L.) Torr. & A. Gray ex Torr.	Ericaceae	Eudicots	sensu Weakley 2012	U.S.A.	NC	Pender	in Spodosol savanna on east side of Half Moon Road, 0.5-1.5 km southwest of intersection of Half Moon Road and Flo Road	Sandy Pine Savanna (Typic subtype) sensu Schafale 2012		9 m. msl	34deg.35'15.7" N	77deg.40'16.0" W	500	Robert Thornhill	229	6	5	2011
NCSC	Gaylussacia frondosa (L.) Torr. & A. Gray ex Torr.	Ericaceae	Eudicots	sensu Weakley 2012	U.S.A.	NC	Pender	in large savanna immediately south of intersection of Flo Road and Fill Road	Wet Loamy Pine Savanna (sensu Schafale 2012)		8 m. msl	34deg.34'54.7" N	77deg.39'9.0" W	100	Robert Thornhill	146	16	4	2011
NCSC	Gaylussacia frondosa (L.) Torr. & A. Gray ex Torr.	Ericaceae	Eudicots	sensu Weakley 2012	U.S.A.	NC	Pender	in large savanna immediately south of intersection of Flo Road and Fill Road	Wet Loamy Pine Savanna (sensu Schafale 2012)		8 m. msl	34deg.34'54.7" N	77deg.39'9.0" W	100	Robert Thornhill	204	1	5	2011
NCSC	Gaylussacia frondosa (L.) Torr. & A. Gray ex Torr.	Ericaceae	Eudicots	sensu Weakley 2012	U.S.A.	NC	Pender	in large savanna immediately south of intersection of Flo Road and Fill Road	Wet Loamy Pine Savanna (sensu Schafale 2012)		8 m. msl	34deg.34'54.7" N	77deg.39'9.0" W	100	Robert Thornhill	212	1	5	2011
NCSC	Gaylussacia frondosa (L.) Torr. & A. Gray ex Torr.	Ericaceae	Eudicots	sensu Weakley 2012	U.S.A.	NC	Pender	in large savanna immediately south of intersection of Flo Road and Fill Road	Wet Loamy Pine Savanna (sensu Schafale 2012)		8 m. msl	34deg.34'54.7" N	77deg.39'9.0" W	100	Robert Thornhill	290	15	5	2011
NCSC	Kalmia carolina Small	Ericaceae	Eudicots	sensu Weakley 2012	U.S.A.	NC	Pender	in pine savannas along Flo Road, approximately 0.4-1.2 km southeast of junction with Half Moon Road	Sandy Pine Savanna (Rush Featherling subtype) sensu Schafale 2012		9 m. msl	34deg.35'11.9" N	77deg.39'45.9" W	400	Robert Thornhill	182	22	4	2011
NCSC	Kalmia carolina Small	Ericaceae	Eudicots	sensu Weakley 2012	U.S.A.	NC	Pender	in Spodosol savanna on east side of Half Moon Road, 0.5-1.5 km southwest of intersection of Half Moon Road and Flo Road	Sandy Pine Savanna (Typic subtype) sensu Schafale 2012		9 m. msl	34deg.35'15.7" N	77deg.40'16.0" W	500	Robert Thornhill	164	22	4	2011
NCSC	Lyonia ligustrina (L.) DC.	Ericaceae	Eudicots	sensu Radford, Ahles, and Bell 1968	U.S.A.	NC	Pender	in pine savanna on northeast corner of intersection of Flo Road and Fill Road	Very Wet Loamy Pine Savanna (sensu Schafale 2012)	frequent	8 m. msl	34deg.35'0.1" N	77deg.38'59.2" W	50	Robert Thornhill	1526	14	8	2012
NCSC	Lyonia ligustrina (L.) DC.	Ericaceae	Eudicots	sensu Radford, Ahles, and Bell 1968	U.S.A.	NC	Pender	in pine savannas along Flo Road, approximately 0.4-1.2 km southeast of junction with Half Moon Road	Sandy Pine Savanna (Rush Featherling subtype) sensu Schafale 2012		9 m. msl	34deg.35'11.9" N	77deg.39'45.9" W	400	Robert Thornhill	591	14	7	2011
NCSC	Lyonia ligustrina (L.) DC.	Ericaceae	Eudicots	sensu Radford, Ahles, and Bell 1968	U.S.A.	NC	Pender	in Spodosol savanna on east side of Half Moon Road, 0.5-1.5 km southwest of intersection of Half Moon Road and Flo Road	Sandy Pine Savanna (Typic subtype) sensu Schafale 2012	frequent	9 m. msl	34deg.35'15.7" N	77deg.40'16.0" W	500	Robert Thornhill	905	19	8	2011
NCSC	Lyonia ligustrina (L.) DC.	Ericaceae	Eudicots	sensu Radford, Ahles, and Bell 1968	U.S.A.	NC	Pender	in Spodosol savanna on east side of Half Moon Road, 0.5-1.5 km southwest of intersection of Half Moon Road and Flo Road	Sandy Pine Savanna (Typic subtype) sensu Schafale 2012	frequent	9 m. msl	34deg.35'15.7" N	77deg.40'16.0" W	500	Robert Thornhill	911	19	8	2011
NCSC	Lyonia ligustrina (L.) DC.	Ericaceae	Eudicots	sensu Radford, Ahles, and Bell 1968	U.S.A.	NC	Pender	in large savanna immediately south of intersection of Flo Road and Fill Road	Wet Loamy Pine Savanna (sensu Schafale 2012)		8 m. msl	34deg.34'54.7" N	77deg.39'9.0" W	100	Robert Thornhill	417	9	6	2011		y
NCSC	Lyonia lucida (Lam.) K. Koch	Ericaceae	Eudicots	sensu Weakley 2012	U.S.A.	NC	Pender	in pine savannas along Flo Road, approximately 0.4-1.2 km southeast of junction with Half Moon Road	Sandy Pine Savanna (Rush Featherling subtype) sensu Schafale 2012		9 m. msl	34deg.35'11.9" N	77deg.39'45.9" W	400	Robert Thornhill	180	22	4	2011
NCSC	Lyonia lucida (Lam.) K. Koch	Ericaceae	Eudicots	sensu Weakley 2012	U.S.A.	NC	Pender	in savanna on east side of Alligator Lake Road, immediately south of junction with Flo Road	Very Wet Loamy Pine Savanna (sensu Schafale 2012)		8 m. msl	34deg.34'54.2" N	77deg.38'38.5" W	50	Robert Thornhill	116	16	4	2011		y
NCSC	Lyonia lucida (Lam.) K. Koch	Ericaceae	Eudicots	sensu Weakley 2012	U.S.A.	NC	Pender	in Spodosol savanna on east side of Half Moon Road, 0.5-1.5 km southwest of intersection of Half Moon Road and Flo Road	Sandy Pine Savanna (Typic subtype) sensu Schafale 2012		9 m. msl	34deg.35'15.7" N	77deg.40'16.0" W	500	Robert Thornhill	167	22	4	2011
NCSC	Lyonia lucida (Lam.) K. Koch	Ericaceae	Eudicots	sensu Weakley 2012	U.S.A.	NC	Pender	in savanna immediately south of Flo Road, approximately 0.3km east of intersection of Flo Road and Fill Road	Wet Loamy Pine Savanna (sensu Schafale 2012)		8 m. msl	34deg.34'56.3" N	77deg.38'48.6" W	50	Robert Thornhill	133	16	4	2011
NCSC	Lyonia mariana (L.) D. Don	Ericaceae	Eudicots	sensu Weakley 2012	U.S.A.	NC	Pender	in pine savannas along Flo Road, approximately 0.4-1.2 km southeast of junction with Half Moon Road	Sandy Pine Savanna (Rush Featherling subtype) sensu Schafale 2012		9 m. msl	34deg.35'11.9" N	77deg.39'45.9" W	400	Robert Thornhill	178	22	4	2011
NCSC	Lyonia mariana (L.) D. Don	Ericaceae	Eudicots	sensu Weakley 2012	U.S.A.	NC	Pender	in pine savannas along Flo Road, approximately 0.4-1.2 km southeast of junction with Half Moon Road	Sandy Pine Savanna (Rush Featherling subtype) sensu Schafale 2012		9 m. msl	34deg.35'11.9" N	77deg.39'45.9" W	400	Robert Thornhill	236	6	5	2011
NCSC	Lyonia mariana (L.) D. Don	Ericaceae	Eudicots	sensu Weakley 2012	U.S.A.	NC	Pender	in savanna on east side of Alligator Lake Road, immediately south of junction with Flo Road	Very Wet Loamy Pine Savanna (sensu Schafale 2012)		8 m. msl	34deg.34'54.2" N	77deg.38'38.5" W	50	Robert Thornhill	118	16	4	2011		y
NCSC	Rhododendron atlanticum (Ashe) Rehder	Ericaceae	Eudicots	sensu FNA	U.S.A.	NC	Pender	in pine savannas along Flo Road, approximately 0.4-1.2 km southeast of junction with Half Moon Road	Sandy Pine Savanna (Rush Featherling subtype) sensu Schafale 2012		9 m. msl	34deg.35'11.9" N	77deg.39'45.9" W	400	Robert Thornhill	179	22	4	2011
NCSC	Rhododendron atlanticum (Ashe) Rehder	Ericaceae	Eudicots	sensu FNA	U.S.A.	NC	Pender	in savanna on east side of Alligator Lake Road, immediately south of junction with Flo Road	Very Wet Loamy Pine Savanna (sensu Schafale 2012)		8 m. msl	34deg.34'54.2" N	77deg.38'38.5" W	50	Robert Thornhill	113	16	4	2011
NCSC	Rhododendron viscosum (L.) Torr.	Ericaceae	Eudicots	sensu FNA	U.S.A.	NC	Pender	in pine savannas along Flo Road, approximately 0.4-1.2 km southeast of junction with Half Moon Road	Sandy Pine Savanna (Rush Featherling subtype) sensu Schafale 2012		9 m. msl	34deg.35'11.9" N	77deg.39'45.9" W	400	Robert Thornhill	308	15	5	2011
NCSC	Rhododendron viscosum (L.) Torr.	Ericaceae	Eudicots	sensu FNA	U.S.A.	NC	Pender	in Spodosol savanna on east side of Half Moon Road, 0.5-1.5 km southwest of intersection of Half Moon Road and Flo Road	Sandy Pine Savanna (Typic subtype) sensu Schafale 2012		9 m. msl	34deg.35'15.7" N	77deg.40'16.0" W	500	Robert Thornhill	225	6	5	2011
NCSC	Rhododendron viscosum (L.) Torr.	Ericaceae	Eudicots	sensu FNA	U.S.A.	NC	Pender	in Spodosol savanna on east side of Half Moon Road, 0.5-1.5 km southwest of intersection of Half Moon Road and Flo Road	Sandy Pine Savanna (Typic subtype) sensu Schafale 2012		9 m. msl	34deg.35'15.7" N	77deg.40'16.0" W	500	Robert Thornhill	266	15	5	2011
NCSC	Vaccinium crassifolium Andrews	Ericaceae	Eudicots	sensu Weakley 2012	U.S.A.	NC	Pender	in pine savannas along Flo Road, approximately 0.4-1.2 km southeast of junction with Half Moon Road	Sandy Pine Savanna (Rush Featherling subtype) sensu Schafale 2012		9 m. msl	34deg.35'11.9" N	77deg.39'45.9" W	400	Robert Thornhill	153	16	4	2011
NCSC	Vaccinium crassifolium Andrews	Ericaceae	Eudicots	sensu Weakley 2012	U.S.A.	NC	Pender	in pine savannas along Flo Road, approximately 0.4-1.2 km southeast of junction with Half Moon Road	Sandy Pine Savanna (Rush Featherling subtype) sensu Schafale 2012		9 m. msl	34deg.35'11.9" N	77deg.39'45.9" W	400	Robert Thornhill	185	22	4	2011
NCSC	Vaccinium crassifolium Andrews	Ericaceae	Eudicots	sensu Weakley 2012	U.S.A.	NC	Pender	in savanna on east side of Alligator Lake Road, immediately south of junction with Flo Road	Very Wet Loamy Pine Savanna (sensu Schafale 2012)		8 m. msl	34deg.34'54.2" N	77deg.38'38.5" W	50	Robert Thornhill	117	16	4	2011		y
NCSC	Vaccinium crassifolium Andrews	Ericaceae	Eudicots	sensu Weakley 2012	U.S.A.	NC	Pender	in Spodosol savanna on east side of Half Moon Road, 0.5-1.5 km southwest of intersection of Half Moon Road and Flo Road	Sandy Pine Savanna (Typic subtype) sensu Schafale 2012		9 m. msl	34deg.35'15.7" N	77deg.40'16.0" W	500	Robert Thornhill	160	22	4	2011
NCSC	Vaccinium formosum Andrews	Ericaceae	Eudicots	sensu Weakley 2012	U.S.A.	NC	Pender	in pine savannas along Flo Road, approximately 0.4-1.2 km southeast of junction with Half Moon Road	Sandy Pine Savanna (Rush Featherling subtype) sensu Schafale 2012	occasional	9 m. msl	34deg.35'11.9" N	77deg.39'45.9" W	400	Robert Thornhill	150	16	4	2011
NCSC	Vaccinium formosum Andrews	Ericaceae	Eudicots	sensu Weakley 2012	U.S.A.	NC	Pender	in pine savannas along Flo Road, approximately 0.4-1.2 km southeast of junction with Half Moon Road	Sandy Pine Savanna (Rush Featherling subtype) sensu Schafale 2012	occasional	9 m. msl	34deg.35'11.9" N	77deg.39'45.9" W	400	Robert Thornhill	183	22	4	2011
NCSC	Vaccinium formosum Andrews	Ericaceae	Eudicots	sensu Weakley 2012	U.S.A.	NC	Pender	in pine savannas along Flo Road, approximately 0.4-1.2 km southeast of junction with Half Moon Road	Sandy Pine Savanna (Rush Featherling subtype) sensu Schafale 2012	occasional	9 m. msl	34deg.35'11.9" N	77deg.39'45.9" W	400	Robert Thornhill	303	15	5	2011
NCSC	Vaccinium formosum Andrews	Ericaceae	Eudicots	sensu Weakley 2012	U.S.A.	NC	Pender	in pine savannas along Flo Road, approximately 0.4-1.2 km southeast of junction with Half Moon Road	Sandy Pine Savanna (Rush Featherling subtype) sensu Schafale 2012	occasional	9 m. msl	34deg.35'11.9" N	77deg.39'45.9" W	400	Robert Thornhill	305	15	5	2011
NCSC	Vaccinium formosum Andrews	Ericaceae	Eudicots	sensu Weakley 2012	U.S.A.	NC	Pender	in Spodosol savanna on east side of Half Moon Road, 0.5-1.5 km southwest of intersection of Half Moon Road and Flo Road	Sandy Pine Savanna (Typic subtype) sensu Schafale 2012	occasional	9 m. msl	34deg.35'15.7" N	77deg.40'16.0" W	500	Robert Thornhill	166	22	4	2011
NCSC	Vaccinium formosum Andrews	Ericaceae	Eudicots	sensu Weakley 2012	U.S.A.	NC	Pender	in Spodosol savanna on east side of Half Moon Road, 0.5-1.5 km southwest of intersection of Half Moon Road and Flo Road	Sandy Pine Savanna (Typic subtype) sensu Schafale 2012	occasional	9 m. msl	34deg.35'15.7" N	77deg.40'16.0" W	500	Robert Thornhill	173	22	4	2011
NCSC	Vaccinium formosum Andrews	Ericaceae	Eudicots	sensu Weakley 2012	U.S.A.	NC	Pender	in Spodosol savanna on east side of Half Moon Road, 0.5-1.5 km southwest of intersection of Half Moon Road and Flo Road	Sandy Pine Savanna (Typic subtype) sensu Schafale 2012	occasional	9 m. msl	34deg.35'15.7" N	77deg.40'16.0" W	500	Robert Thornhill	264	15	5	2011
NCSC	Vaccinium formosum Andrews	Ericaceae	Eudicots	sensu Weakley 2012	U.S.A.	NC	Pender	in large savanna immediately south of intersection of Flo Road and Fill Road	Wet Loamy Pine Savanna (sensu Schafale 2012)	occasional	8 m. msl	34deg.34'54.7" N	77deg.39'9.0" W	100	Robert Thornhill	147	16	4	2011
NCSC	Vaccinium fuscatum Aiton	Ericaceae	Eudicots	sensu Weakley 2012	U.S.A.	NC	Pender	in pine savannas along Flo Road, approximately 0.4-1.2 km southeast of junction with Half Moon Road	Sandy Pine Savanna (Rush Featherling subtype) sensu Schafale 2012		9 m. msl	34deg.35'11.9" N	77deg.39'45.9" W	400	Robert Thornhill	82	20	3	2011
NCSC	Vaccinium fuscatum Aiton	Ericaceae	Eudicots	sensu Weakley 2012	U.S.A.	NC	Pender	in pine savannas along Flo Road, approximately 0.4-1.2 km southeast of junction with Half Moon Road	Sandy Pine Savanna (Rush Featherling subtype) sensu Schafale 2012	occasional	9 m. msl	34deg.35'11.9" N	77deg.39'45.9" W	400	Robert Thornhill	302	15	5	2011
NCSC	Vaccinium fuscatum Aiton	Ericaceae	Eudicots	sensu Weakley 2012	U.S.A.	NC	Pender	in savanna .18 km south of Flo Road at a point approximately 0.3km east of intersection of Flo Road and Fill Road	Very Wet Loamy Pine Savanna (sensu Schafale 2012)	occasional	8 m. msl	34deg.34'50.5" N	77deg.38'46.6" W	50	Robert Thornhill	277	15	5	2011
NCSC	Vaccinium fuscatum Aiton	Ericaceae	Eudicots	sensu Weakley 2012	U.S.A.	NC	Pender	in savanna on east side of Alligator Lake Road, immediately south of junction with Flo Road	Very Wet Loamy Pine Savanna (sensu Schafale 2012)		8 m. msl	34deg.34'54.2" N	77deg.38'38.5" W	50	Robert Thornhill	78	20	3	2011
NCSC	Vaccinium fuscatum Aiton	Ericaceae	Eudicots	sensu Weakley 2012	U.S.A.	NC	Pender	in Spodosol savanna on east side of Half Moon Road, 0.5-1.5 km southwest of intersection of Half Moon Road and Flo Road	Sandy Pine Savanna (Typic subtype) sensu Schafale 2012	occasional	9 m. msl	34deg.35'15.7" N	77deg.40'16.0" W	500	Robert Thornhill	101	20	3	2011
NCSC	Vaccinium fuscatum Aiton	Ericaceae	Eudicots	sensu Weakley 2012	U.S.A.	NC	Pender	in Spodosol savanna on east side of Half Moon Road, 0.5-1.5 km southwest of intersection of Half Moon Road and Flo Road	Sandy Pine Savanna (Typic subtype) sensu Schafale 2012		9 m. msl	34deg.35'15.7" N	77deg.40'16.0" W	500	Robert Thornhill	267	15	5	2011		y
NCSC	Vaccinium fuscatum Aiton	Ericaceae	Eudicots	sensu Weakley 2012	U.S.A.	NC	Pender	in large savanna immediately south of intersection of Flo Road and Fill Road	Wet Loamy Pine Savanna (sensu Schafale 2012)		8 m. msl	34deg.34'54.7" N	77deg.39'9.0" W	100	Robert Thornhill	79	20	3	2011
NCSC	Vaccinium fuscatum Aiton	Ericaceae	Eudicots	sensu Weakley 2012	U.S.A.	NC	Pender	in large savanna immediately south of intersection of Flo Road and Fill Road	Wet Loamy Pine Savanna (sensu Schafale 2012)		8 m. msl	34deg.34'54.7" N	77deg.39'9.0" W	100	Robert Thornhill	763	3	8	2011
NCSC	Vaccinium fuscatum Aiton	Ericaceae	Eudicots	sensu Weakley 2012	U.S.A.	NC	Pender	in savanna immediately south of Flo Road, approximately 0.3km east of intersection of Flo Road and Fill Road	Wet Loamy Pine Savanna (sensu Schafale 2012)	occasional	8 m. msl	34deg.34'56.3" N	77deg.38'48.6" W	50	Robert Thornhill	92	20	3	2011
NCSC	Vaccinium tenellum Aiton	Ericaceae	Eudicots	sensu Weakley 2012	U.S.A.	NC	Pender	in pine savannas along Flo Road, approximately 0.4-1.2 km southeast of junction with Half Moon Road	Sandy Pine Savanna (Rush Featherling subtype) sensu Schafale 2012		9 m. msl	34deg.35'11.9" N	77deg.39'45.9" W	400	Robert Thornhill	184	22	4	2011
NCSC	Vaccinium tenellum Aiton	Ericaceae	Eudicots	sensu Weakley 2012	U.S.A.	NC	Pender	in Spodosol savanna on east side of Half Moon Road, 0.5-1.5 km southwest of intersection of Half Moon Road and Flo Road	Sandy Pine Savanna (Typic subtype) sensu Schafale 2012	frequent	9 m. msl	34deg.35'15.7" N	77deg.40'16.0" W	500	Robert Thornhill	1222	28	10	2011
NCSC	Vaccinium tenellum Aiton	Ericaceae	Eudicots	sensu Weakley 2012	U.S.A.	NC	Pender	in large savanna immediately south of intersection of Flo Road and Fill Road	Wet Loamy Pine Savanna (sensu Schafale 2012)		8 m. msl	34deg.34'54.7" N	77deg.39'9.0" W	100	Robert Thornhill	145	16	4	2011		y
NCSC	Vaccinium tenellum Aiton	Ericaceae	Eudicots	sensu Weakley 2012	U.S.A.	NC	Pender	in large savanna immediately south of intersection of Flo Road and Fill Road	Wet Loamy Pine Savanna (sensu Schafale 2012)		8 m. msl	34deg.34'54.7" N	77deg.39'9.0" W	100	Robert Thornhill	145	16	4	2011		y
NCSC	Vaccinium tenellum Aiton	Ericaceae	Eudicots	sensu Weakley 2012	U.S.A.	NC	Pender	in large savanna immediately south of intersection of Flo Road and Fill Road	Wet Loamy Pine Savanna (sensu Schafale 2012)		8 m. msl	34deg.34'54.7" N	77deg.39'9.0" W	100	Robert Thornhill	755	3	8	2011
NCSC	Vaccinium tenellum Aiton	Ericaceae	Eudicots	sensu Weakley 2012	U.S.A.	NC	Pender	in moist grown-over flatwoods immediately south of Mule Pen Road, approximately 2.5 km west of junction with Williams Road	Wet Pine Flatwoods (Typic subtype ) sensu Schafale 2012		6 m. msl	34deg.35'20.6" N	77deg.42'43.6" W	50	Robert Thornhill	1423	19	6	2012			immediately south of Mule Pen Road, approximately 1 mile west of intersection with Williams Road
NCSC	Vaccinium tenellum Aiton	Ericaceae	Eudicots	sensu Weakley 2012	U.S.A.	NC	Pender	in moist grown-over flatwoods immediately south of Mule Pen Road, approximately 2.5 km west of junction with Williams Road	Wet Pine Flatwoods (Typic subtype ) sensu Schafale 2012		6 m. msl	34deg.35'20.6" N	77deg.42'43.6" W	50	Robert Thornhill	1424	19	6	2012			immediately south of Mule Pen Road, approximately 1 mile west of intersection with Williams Road
NCSC	Vaccinium tenellum Aiton	Ericaceae	Eudicots	sensu Weakley 2012	U.S.A.	NC	Pender	in moist grown-over flatwoods immediately south of Mule Pen Road, approximately 2.5 km west of junction with Williams Road	Wet Pine Flatwoods (Typic subtype ) sensu Schafale 2012		6 m. msl	34deg.35'20.6" N	77deg.42'43.6" W	50	Robert Thornhill	1424	19	6	2012			immediately south of Mule Pen Road, approximately 1 mile west of intersection with Williams Road
NCSC	Zenobia pulverulenta (W. Bartram ex Willd.) Pollard	Ericaceae	Eudicots	sensu Weakley 2012	U.S.A.	NC	Pender	in pine savannas along Flo Road, approximately 0.4-1.2 km southeast of junction with Half Moon Road	Sandy Pine Savanna (Rush Featherling subtype) sensu Schafale 2012		9 m. msl	34deg.35'11.9" N	77deg.39'45.9" W	400	Robert Thornhill	307	15	5	2011
NCSC	Zenobia pulverulenta (W. Bartram ex Willd.) Pollard	Ericaceae	Eudicots	sensu Weakley 2012	U.S.A.	NC	Pender	in pine savannas along Flo Road, approximately 0.4-1.2 km southeast of junction with Half Moon Road	Sandy Pine Savanna (Rush Featherling subtype) sensu Schafale 2012		9 m. msl	34deg.35'11.9" N	77deg.39'45.9" W	400	Robert Thornhill	508	14	7	2011
NCSC	Zenobia pulverulenta (W. Bartram ex Willd.) Pollard	Ericaceae	Eudicots	sensu Weakley 2012	U.S.A.	NC	Pender	in Spodosol savanna on east side of Half Moon Road, 0.5-1.5 km southwest of intersection of Half Moon Road and Flo Road	Sandy Pine Savanna (Typic subtype) sensu Schafale 2012		9 m. msl	34deg.35'15.7" N	77deg.40'16.0" W	500	Robert Thornhill	231	6	5	2011		y
NCSC	Zenobia pulverulenta (W. Bartram ex Willd.) Pollard	Ericaceae	Eudicots	sensu Weakley 2012	U.S.A.	NC	Pender	in Spodosol savanna on east side of Half Moon Road, 0.5-1.5 km southwest of intersection of Half Moon Road and Flo Road	Sandy Pine Savanna (Typic subtype) sensu Schafale 2012		9 m. msl	34deg.35'15.7" N	77deg.40'16.0" W	500	Robert Thornhill	259	15	5	2011		y
NCSC	Zenobia pulverulenta (W. Bartram ex Willd.) Pollard	Ericaceae	Eudicots	sensu Weakley 2012	U.S.A.	NC	Pender	in Spodosol savanna on east side of Half Moon Road, 0.5-1.5 km southwest of intersection of Half Moon Road and Flo Road	Sandy Pine Savanna (Typic subtype) sensu Schafale 2012		9 m. msl	34deg.35'15.7" N	77deg.40'16.0" W	500	Robert Thornhill	259	15	5	2011		y
NCSC	Acalypha gracilens A. Gray	Euphorbiaceae	Eudicots	sensu Weakley 2012	U.S.A.	NC	Pender	in food plot northwest of intersection of Alligator Lake Road and Flo Road	weedy open area (food plot)	occasional	8 m. msl	34deg.34'59.0" N	77deg.38'46.7" W	100	Robert Thornhill	1525	14	8	2012			in food plot across from Alligator Lake Road
NCSC	Cnidoscolus stimulosus (Michx.) Engelm. & A. Gray	Euphorbiaceae	Eudicots	sensu Weakley 2012	U.S.A.	NC	Pender	in savanna along west side of Williams Road, just north ofjunction with Mule Pen Road	Mesic Pine Savanna (Coastal Plain subtype) sensu Schafale 2012	infrequent	8 m. msl	34deg.35'6.4" N	77deg.41'23.7" W	20	Robert Thornhill	1275	2	5	2012
NCSC	Euphorbia ipecacuanhae L.	Euphorbiaceae	Eudicots	sensu Weakley 2012	U.S.A.	NC	Pender	on sandy ridge south of Mule Pen Road, approximately 2.5 km west of junction with Williams Road	Pine/Scrub Oak Sandhill (Mesic Transition subtype) sensu Schafale 2012	infrequent	7 m. msl	34deg.35'19.4" N	77deg.42'44.0" W	50	Robert Thornhill	1418	19	6	2012			on sandy ridge south of Mule Pen Road, approximately 1 mile west of intersection with Williams Road
NCSC	Euphorbia maculata L.	Euphorbiaceae	Eudicots	sensu Weakley 2012	U.S.A.	NC	Pender	south side of Flo Road, immediately across from intersection with Fill Road	sandy roadside	infrequent	9 m. msl	34deg.34'56.9" N	77deg.39'2.7" W	5	Robert Thornhill	1444	11	7	2012			south side of Flo Road at juncture with powerline cut
NCSC	Tragia urens L.	Euphorbiaceae	Eudicots	sensu Weakley 2012	U.S.A.	NC	Pender	on sandy ridge south of Mule Pen Road, approximately 2.5 km west of junction with Williams Road	Pine/Scrub Oak Sandhill (Mesic Transition subtype) sensu Schafale 2012	infrequent	7 m. msl	34deg.35'19.4" N	77deg.42'44.0" W	50	Robert Thornhill	1419	19	6	2012			on sandy ridge south of Mule Pen Road, approximately 1 mile west of intersection with Williams Road
NCSC	Amorpha georgiana Wilbur	Fabaceae	Eudicots	sensu Weakley 2012	U.S.A.	NC	Pender		Very Wet Loamy Pine Savanna (sensu Schafale 2012)	rare				50	Robert Thornhill	1073	16	9	2011
NCSC	Amorpha georgiana Wilbur	Fabaceae	Eudicots	sensu Weakley 2012	U.S.A.	NC	Pender		Very Wet Loamy Pine Savanna (sensu Schafale 2012)	rare				50	Robert Thornhill	1177	23	10	2011		y
NCSC	Amorpha georgiana Wilbur	Fabaceae	Eudicots	sensu Weakley 2012	U.S.A.	NC	Pender		Very Wet Loamy Pine Savanna (sensu Schafale 2012)	rare				50	Robert Thornhill	1239	6	11	2011		y
NCSC	Amorpha herbacea Walter var. herbacea	Fabaceae	Eudicots	sensu Weakley 2012	U.S.A.	NC	Pender	along eastern edge of powerline cut, approximately .2 mi south of junction with Indian Grave Road	Mesic Pine Savanna (Coastal Plain subtype) sensu Schafale 2012	infrequent	9 m. msl	34deg.34'55.1" N	77deg.41'11.6" W	20	Robert Thornhill	1541	14	9	2012		y	just north of Indian Grave Road, approximately .2 mi southeast of intersection with powerline cut
NCSC	Apios americana Medik.	Fabaceae	Eudicots	sensu Weakley 2012	U.S.A.	NC	Pender	in flatwoods/savanna approximately 80 meters north of intersection of Alligator Lake Road and Flo Road	Mesic Pine Savanna (Coastal Plain subtype) sensu Schafale 2012	rare	9 m. msl	34deg.35'0.8" N	77deg.38'37.7" W	50	Robert Thornhill	1179	23	10	2011		y	near VWC2
NCSC	Centrosema virginianum (L.) Benth.	Fabaceae	Eudicots	sensu Weakley 2012	U.S.A.	NC	Pender	in flatwoods/savanna approximately 80 meters north of intersection of Alligator Lake Road and Flo Road, just east of food plot	Mesic Pine Savanna (Coastal Plain subtype) sensu Schafale 2012	occasional	9 m. msl	34deg.35'0.8" N	77deg.38'37.7" W	50	Robert Thornhill	972	26	8	2011
NCSC	Chamaecrista nictitans (L.) Moench	Fabaceae	Eudicots	sensu Weakley 2012	U.S.A.	NC	Pender	in savanna on east side of Alligator Lake Road, immediately south of junction with Flo Road	Very Wet Loamy Pine Savanna (sensu Schafale 2012)	infrequent	8 m. msl	34deg.34'54.2" N	77deg.38'38.5" W	50	Robert Thornhill	1172	23	10	2011		y
NCSC	Desmodium tenuifolium Torr. & A. Gray	Fabaceae	Eudicots	sensu Weakley 2012	U.S.A.	NC	Pender	in small pine savanna on south side of Flo Road, approximately .1 km west of junction with Alligator Lake Road	Very Wet Loamy Pine Savanna (sensu Schafale 2012)		9 m. msl	34deg.34'58.0" N	77deg.38'41.0" W	20	Robert Thornhill	827	12	8	2011
NCSC	Desmodium tenuifolium Torr. & A. Gray	Fabaceae	Eudicots	sensu Weakley 2012	U.S.A.	NC	Pender	in savanna on east side of Alligator Lake Road, immediately south of junction with Flo Road	Very Wet Loamy Pine Savanna (sensu Schafale 2012)	occasional	8 m. msl	34deg.34'54.2" N	77deg.38'38.5" W	50	Robert Thornhill	1084	16	9	2011
NCSC	Desmodium tenuifolium Torr. & A. Gray	Fabaceae	Eudicots	sensu Weakley 2012	U.S.A.	NC	Pender	in large savanna immediately south of intersection of Flo Road and Fill Road	Wet Loamy Pine Savanna (sensu Schafale 2012)	occasional (in drier sites)	8 m. msl	34deg.34'54.7" N	77deg.39'9.0" W	100	Robert Thornhill	1046	9	9	2011
NCSC	Kummerowia striata (Thunb.) Schindl.	Fabaceae	Eudicots	sensu Weakley 2012	U.S.A.	NC	Pender	south side of Flo Road, immediately across from intersection with Fill Road	sandy roadside	occasional	9 m. msl	34deg.34'56.9" N	77deg.39'2.7" W	20	Robert Thornhill	1449	26	7	2012			along Flo Road, near intersection with Fill Road
NCSC	Lespedeza angustifolia (Pursh) Elliott	Fabaceae	Eudicots	sensu Weakley 2012	U.S.A.	NC	Pender	in flatwoods/savanna approximately 80 meters north of intersection of Alligator Lake Road and Flo Road, just east of food plot	Mesic Pine Savanna (Coastal Plain subtype) sensu Schafale 2012	occasional	9 m. msl	34deg.35'0.8" N	77deg.38'37.7" W	50	Robert Thornhill	1553	14	9	2012			in flatwoods north of intersection of Flo Road and Alligator Lake Road, east of food plot
NCSC	Lespedeza capitata Michx.	Fabaceae	Eudicots	sensu Weakley 2012	U.S.A.	NC	Pender	in savanna on east side of Alligator Lake Road, immediately south of junction with Flo Road	Very Wet Loamy Pine Savanna (sensu Schafale 2012)	rare	8 m. msl	34deg.34'54.2" N	77deg.38'38.5" W	50	Robert Thornhill	1075	16	9	2011
NCSC	Lespedeza capitata Michx.	Fabaceae	Eudicots	sensu Weakley 2012	U.S.A.	NC	Pender	in large savanna immediately south of intersection of Flo Road and Fill Road	Wet Loamy Pine Savanna (sensu Schafale 2012)	rare	8 m. msl	34deg.34'54.7" N	77deg.39'9.0" W	100	Robert Thornhill	1031	9	9	2011
NCSC	Lespedeza cuneata (Dum. Cours.) G. Don	Fabaceae	Eudicots	sensu Weakley 2012	U.S.A.	NC	Pender	in food plot northwest of intersection of Alligator Lake Road and Flo Road	weedy open area (food plot)	occasional	8 m. msl	34deg.34'59.0" N	77deg.38'46.7" W	100	Robert Thornhill	625	14	7	2011			in food plot north of Alligator Lake Road
NCSC	Lespedeza hirta (L.) Hornem. var. curtissii (Clewell) Isely	Fabaceae	Eudicots	sensu Weakley 2012	U.S.A.	NC	Pender	in flatwoods/savanna approximately 80 meters north of intersection of Alligator Lake Road and Flo Road, just east of food plot	Mesic Pine Savanna (Coastal Plain subtype) sensu Schafale 2012	infrequent	9 m. msl	34deg.35'0.8" N	77deg.38'37.7" W	50	Robert Thornhill	1539	28	8	2012			in flatwoods north of Mule Pen Road, approximately .75 mi west of intersection of Mule Pen Road and Williams Road
NCSC	Senna obtusifolia (L.) H.S. Irwin & Barneby	Fabaceae	Eudicots	sensu Weakley 2012	U.S.A.	NC	Pender	in food plot south of Meadow Lake Road, approximately 0.35 km southwest of intersection with Flo Road	weedy open area (food plot)	frequent	9 m. msl	34deg.34'51.1" N	77deg.39'44.3" W	50	Robert Thornhill	1455	26	7	2012		y	in food plot along east side of Meadow Lake Road
NCSC	Stylosanthes biflora (L.) Britton, Sterns & Poggenb.	Fabaceae	Eudicots	sensu Weakley 2012	U.S.A.	NC	Pender	near borrow pit ca. 0.1 km south of hunting lodge, just east of Williams Road	disturbed mesic pine savanna	rare	8 m. msl	34deg.35'0.8" N	77deg.40'2.0" W	20	Robert Thornhill	1473	26	7	2012			near borrow pit immediately south of hunting lodge on Williams Road
NCSC	Tephrosia hispidula (Michx.) Pers.	Fabaceae	Eudicots	sensu Weakley 2012	U.S.A.	NC	Pender	in large savanna immediately south of intersection of Flo Road and Fill Road	Wet Loamy Pine Savanna (sensu Schafale 2012)		8 m. msl	34deg.34'54.7" N	77deg.39'9.0" W	100	Robert Thornhill	602	14	7	2011
NCSC	Tephrosia hispidula (Michx.) Pers.	Fabaceae	Eudicots	sensu Weakley 2012	U.S.A.	NC	Pender	in savanna on east side of Alligator Lake Road, immediately south of junction with Flo Road	Very Wet Loamy Pine Savanna (sensu Schafale 2012)	occasional	8 m. msl	34deg.34'54.2" N	77deg.38'38.5" W	50	Robert Thornhill	553	28	6	2011
NCSC	Tephrosia hispidula (Michx.) Pers.	Fabaceae	Eudicots	sensu Weakley 2012	U.S.A.	NC	Pender	in savanna on east side of Alligator Lake Road, immediately south of junction with Flo Road	Very Wet Loamy Pine Savanna (sensu Schafale 2012)	occasional	8 m. msl	34deg.34'54.2" N	77deg.38'38.5" W	50	Robert Thornhill	702	21	7	2011
NCSC	Tephrosia hispidula (Michx.) Pers.	Fabaceae	Eudicots	sensu Weakley 2012	U.S.A.	NC	Pender	in large savanna immediately south of intersection of Flo Road and Fill Road	Wet Loamy Pine Savanna (sensu Schafale 2012)		8 m. msl	34deg.34'54.7" N	77deg.39'9.0" W	100	Robert Thornhill	416	9	6	2011		y
NCSC	Trifolium dubium Sibth.	Fabaceae	Eudicots	sensu Weakley 2012	U.S.A.	NC	Pender	south side of Flo Road, immediately across from intersection with Fill Road	sandy roadside	occasional	9 m. msl	34deg.34'56.9" N	77deg.39'2.7" W	5	Robert Thornhill	222	26	3	2012			south side of Flo Road, immediately across from intersection with Fill Road
NCSC	Wisteria frutescens (L.) Poir.	Fabaceae	Eudicots	sensu Weakley 2012	U.S.A.	NC	Pender	in marsh in powerline right-of-way, approximately .2 km north of Shaken Creek	Small Depression Pond (?) sensu Schafale 2012	occasional	6 m. msl	34deg.34'51.4" N	77deg.41'25.7" W	50	Robert Thornhill	1538	28	8	2012			in ponded area in powerline cut, just north of Shaken Creek
NCSC	Quercus coccinea Münchh.	Fagaceae	Eudicots	sensu Weakley 2012	U.S.A.	NC	Pender	just south of Indian Grave Road, approximately .35 km southeast of junction with powerline right-of-way	Mesic Pine Savanna (Coastal Plain subtype) sensu Schafale 2012	infrequent	9 m. msl	34deg.34'55.1" N	77deg.41'11.6" W	20	Robert Thornhill	1543	14	9	2012		y	just south of Indian Grave Road, approximately .2 mi southeast of intersection with powerline cut
NCSC	Quercus falcata Michx.	Fagaceae	Eudicots	sensu Weakley 2012	U.S.A.	NC	Pender	500 meters southwest of Mule Pen Road at approximately .45 km southeast of end of Mule Pen Road	Pine/Scrub Oak Sandhill (Mesic Transition subtype) sensu Schafale 2012	infrequent	7 m. msl	34deg.35'22.2" N	77deg.42'57.0" W	100	Robert Thornhill	1329	3	6	2012		y	southwestern corner of property, .1 mi west of Mule Pen Road atapproximately .35 mi from end of Mule Pen Road.
NCSC	Quercus incana W. Bartram	Fagaceae	Eudicots	sensu Weakley 2012	U.S.A.	NC	Pender	500 meters southwest of Mule Pen Road at approximately .45 km southeast of end of Mule Pen Road	Pine/Scrub Oak Sandhill (Mesic Transition subtype) sensu Schafale 2012	infrequent	7 m. msl	34deg.35'22.2" N	77deg.42'57.0" W	100	Robert Thornhill	1327	3	6	2012		y	southwestern corner of property, .1 mi west of Mule Pen Road atapproximately .25 mi from end of Mule Pen Road.
NCSC	Quercus laurifolia Michx.	Fagaceae	Eudicots	sensu Weakley 2012	U.S.A.	NC	Pender	in savanna .18 km south of Flo Road at a point approximately 0.3km east of intersection of Flo Road and Fill Road	Very Wet Loamy Pine Savanna (sensu Schafale 2012)	infrequent	8 m. msl	34deg.34'50.5" N	77deg.38'46.6" W	50	Robert Thornhill	429	9	6	2011
NCSC	Quercus laurifolia Michx.	Fagaceae	Eudicots	sensu Weakley 2012	U.S.A.	NC	Pender	in savanna .18 km south of Flo Road at a point approximately 0.3km east of intersection of Flo Road and Fill Road	Very Wet Loamy Pine Savanna (sensu Schafale 2012)	infrequent	8 m. msl	34deg.34'50.5" N	77deg.38'46.6" W	50	Robert Thornhill	1022	2	9	2011
NCSC	Quercus margarettae (Ashe) Small	Fagaceae	Eudicots	sensu Weakley 2012	U.S.A.	NC	Pender	500 meters southwest of Mule Pen Road at approximately .45 km southeast of end of Mule Pen Road	Pine/Scrub Oak Sandhill (Mesic Transition subtype) sensu Schafale 2012	infrequent	7 m. msl	34deg.35'22.2" N	77deg.42'57.0" W	100	Robert Thornhill	1328	3	6	2012		y	southwestern corner of property, .1 mi west of Mule Pen Road atapproximately .35 mi from end of Mule Pen Road.
NCSC	Quercus marilandica Münchh. var. marilandica	Fagaceae	Eudicots	sensu Weakley 2012	U.S.A.	NC	Pender	sandy ridge just north of Mule Pen Road, approximately .8 km west of junction with Williams Road	Pine/Scrub Oak Sandhill (Mesic Transition subtype) sensu Schafale 2012	infrequent	8 m. msl	34deg.35'16.6" N	77deg.41'54.4" W		Robert Thornhill	1317	3	6	2012			sandy ridge just north of Mule Pen Road, approximately .6 miles past intersection of Mule Pen Road and Williams Road
NCSC	Quercus nigra L.	Fagaceae	Eudicots	sensu Weakley 2012	U.S.A.	NC	Pender	in large savanna immediately south of intersection of Flo Road and Fill Road	Wet Loamy Pine Savanna (sensu Schafale 2012)	infrequent	8 m. msl	34deg.34'54.7" N	77deg.39'9.0" W	100	Robert Thornhill	203	1	5	2011
NCSC	Quercus nigra L.	Fagaceae	Eudicots	sensu Weakley 2012	U.S.A.	NC	Pender	in large savanna immediately south of intersection of Flo Road and Fill Road	Wet Loamy Pine Savanna (sensu Schafale 2012)	infrequent	8 m. msl	34deg.34'54.7" N	77deg.39'9.0" W	100	Robert Thornhill	207	1	5	2011		y
NCSC	Quercus nigra L.	Fagaceae	Eudicots	sensu Weakley 2012	U.S.A.	NC	Pender	in large savanna immediately south of intersection of Flo Road and Fill Road	Wet Loamy Pine Savanna (sensu Schafale 2012)	infrequent	8 m. msl	34deg.34'54.7" N	77deg.39'9.0" W	100	Robert Thornhill	282	15	5	2011		y
NCSC	Quercus nigra L.	Fagaceae	Eudicots	sensu Weakley 2012	U.S.A.	NC	Pender	in large savanna immediately south of intersection of Flo Road and Fill Road	Wet Loamy Pine Savanna (sensu Schafale 2012)	infrequent	8 m. msl	34deg.34'54.7" N	77deg.39'9.0" W	100	Robert Thornhill	362	30	5	2011
NCSC	Gelsemium sempervirens J. St.-Hil.	Gelsemiaceae	Eudicots	sensu Weakley 2012	U.S.A.	NC	Pender	in savanna on east side of Alligator Lake Road, immediately south of junction with Flo Road	Very Wet Loamy Pine Savanna (sensu Schafale 2012)		8 m. msl	34deg.34'54.2" N	77deg.38'38.5" W	50	Robert Thornhill	84	20	3	2011
NCSC	Bartonia verna Raf. ex Barton	Gentianaceae	Eudicots	sensu Weakley 2012	U.S.A.	NC	Pender	in Spodosol savanna on east side of Half Moon Road, 0.5-1.5 km southwest of intersection of Half Moon Road and Flo Road	Sandy Pine Savanna (Typic subtype) sensu Schafale 2012	infrequent	9 m. msl	34deg.35'15.7" N	77deg.40'16.0" W	500	Robert Thornhill	1250	27	2	2012		y
NCSC	Bartonia virginica (L.) Britton, Sterns & Poggenb.	Gentianaceae	Eudicots	sensu Weakley 2012	U.S.A.	NC	Pender	in Spodosol savanna on east side of Half Moon Road, 0.5-1.5 km southwest of intersection of Half Moon Road and Flo Road	Sandy Pine Savanna (Typic subtype) sensu Schafale 2012	infrequent	9 m. msl	34deg.35'15.7" N	77deg.40'16.0" W	500	Robert Thornhill	907	19	8	2011
NCSC	Bartonia virginica (L.) Britton, Sterns & Poggenb.	Gentianaceae	Eudicots	sensu Weakley 2012	U.S.A.	NC	Pender	in large savanna immediately south of intersection of Flo Road and Fill Road	Wet Loamy Pine Savanna (sensu Schafale 2012)	occasional	8 m. msl	34deg.34'54.7" N	77deg.39'9.0" W	100	Robert Thornhill	749	3	8	2011
NCSC	Gentiana autumnalis L.	Gentianaceae	Eudicots	sensu Weakley 2012	U.S.A.	NC	Pender	in savanna on east side of Alligator Lake Road, immediately south of junction with Flo Road	Very Wet Loamy Pine Savanna (sensu Schafale 2012)	frequent	8 m. msl	34deg.34'54.2" N	77deg.38'38.5" W	50	Robert Thornhill	47	16	10	2010
NCSC	Gentiana autumnalis L.	Gentianaceae	Eudicots	sensu Weakley 2012	U.S.A.	NC	Pender	in savanna on east side of Alligator Lake Road, immediately south of junction with Flo Road	Very Wet Loamy Pine Savanna (sensu Schafale 2012)	frequent	8 m. msl	34deg.34'54.2" N	77deg.38'38.5" W	50	Robert Thornhill	47	16	10	2010
NCSC	Gentiana autumnalis L.	Gentianaceae	Eudicots	sensu Weakley 2012	U.S.A.	NC	Pender	in savanna immediately south of Flo Road, approximately 0.3km east of intersection of Flo Road and Fill Road	Wet Loamy Pine Savanna (sensu Schafale 2012)	frequent	8 m. msl	34deg.34'56.3" N	77deg.38'48.6" W	50	Robert Thornhill	1234	6	11	2011
NCSC	Gentiana catesbaei Walter	Gentianaceae	Eudicots	sensu Weakley 2012	U.S.A.	NC	Pender	in Spodosol savanna on east side of Half Moon Road, 0.5-1.5 km southwest of intersection of Half Moon Road and Flo Road	Sandy Pine Savanna (Typic subtype) sensu Schafale 2012	occasional	9 m. msl	34deg.35'15.7" N	77deg.40'16.0" W	500	Robert Thornhill	1204	28	10	2011		y
NCSC	Gentiana catesbaei Walter	Gentianaceae	Eudicots	sensu Weakley 2012	U.S.A.	NC	Pender	in savanna immediately south of Flo Road, approximately 0.3km east of intersection of Flo Road and Fill Road	Wet Loamy Pine Savanna (sensu Schafale 2012)	occasional	8 m. msl	34deg.34'56.3" N	77deg.38'48.6" W	50	Robert Thornhill	1230	6	11	2011
NCSC	Gentiana catesbaei Walter	Gentianaceae	Eudicots	sensu Weakley 2012	U.S.A.	NC	Pender	in savanna immediately south of Flo Road, approximately 0.3km east of intersection of Flo Road and Fill Road	Wet Loamy Pine Savanna (sensu Schafale 2012)	occasional	8 m. msl	34deg.34'56.3" N	77deg.38'48.6" W	50	Robert Thornhill	1233	6	11	2011
NCSC	Gentiana saponaria L.	Gentianaceae	Eudicots	sensu Weakley 2012	U.S.A.	NC	Pender	in savanna .18 km south of Flo Road at a point approximately 0.3km east of intersection of Flo Road and Fill Road	Very Wet Loamy Pine Savanna (sensu Schafale 2012)	infrequent	8 m. msl	34deg.34'50.5" N	77deg.38'46.6" W	50	Robert Thornhill	1183	23	10	2011
NCSC	Gentiana saponaria L.	Gentianaceae	Eudicots	sensu Weakley 2012	U.S.A.	NC	Pender	in savanna immediately south of Flo Road, approximately 0.3km east of intersection of Flo Road and Fill Road	Wet Loamy Pine Savanna (sensu Schafale 2012)	infrequent	8 m. msl	34deg.34'56.3" N	77deg.38'48.6" W	50	Robert Thornhill	1231	6	11	2011		y
NCSC	Sabatia brachiata Elliott	Gentianaceae	Eudicots	sensu Weakley 2012	U.S.A.	NC	Pender	in savanna on east side of Alligator Lake Road, immediately south of junction with Flo Road	Very Wet Loamy Pine Savanna (sensu Schafale 2012)	occasional	8 m. msl	34deg.34'54.2" N	77deg.38'38.5" W	50	Robert Thornhill	550	28	6	2011
NCSC	Sabatia campanulata (L.) Torr.	Gentianaceae	Eudicots	sensu Weakley 2012	U.S.A.	NC	Pender	in savanna on east side of Alligator Lake Road, immediately south of junction with Flo Road	Very Wet Loamy Pine Savanna (sensu Schafale 2012)		8 m. msl	34deg.34'54.2" N	77deg.38'38.5" W	50	Robert Thornhill	560	28	6	2011
NCSC	Sabatia campanulata (L.) Torr.	Gentianaceae	Eudicots	sensu Weakley 2012	U.S.A.	NC	Pender	in large savanna immediately south of intersection of Flo Road and Fill Road	Wet Loamy Pine Savanna (sensu Schafale 2012)	occasional	8 m. msl	34deg.34'54.7" N	77deg.39'9.0" W	100	Robert Thornhill	609	14	7	2011
NCSC	Sabatia campanulata (L.) Torr.	Gentianaceae	Eudicots	sensu Weakley 2012	U.S.A.	NC	Pender	in large savanna immediately south of intersection of Flo Road and Fill Road	Wet Loamy Pine Savanna (sensu Schafale 2012)	occasional	8 m. msl	34deg.34'54.7" N	77deg.39'9.0" W	100	Robert Thornhill	619	14	7	2011
NCSC	Sabatia difformis (L.) Druce	Gentianaceae	Eudicots	sensu Weakley 2012	U.S.A.	NC	Pender	in pine savannas along Flo Road, approximately 0.4-1.2 km southeast of junction with Half Moon Road	Sandy Pine Savanna (Rush Featherling subtype) sensu Schafale 2012	flowers atypically small	9 m. msl	34deg.35'11.9" N	77deg.39'45.9" W	400	Robert Thornhill	581	14	7	2011		y
NCSC	Sabatia difformis (L.) Druce	Gentianaceae	Eudicots	sensu Weakley 2012	U.S.A.	NC	Pender	in large savanna immediately south of intersection of Flo Road and Fill Road	Wet Loamy Pine Savanna (sensu Schafale 2012)		8 m. msl	34deg.34'54.7" N	77deg.39'9.0" W	100	Robert Thornhill	620	14	7	2011
NCSC	Sabatia difformis (L.) Druce	Gentianaceae	Eudicots	sensu Weakley 2012	U.S.A.	NC	Pender	in pine savannas along Flo Road, approximately 0.4-1.2 km southeast of junction with Half Moon Road	Sandy Pine Savanna (Rush Featherling subtype) sensu Schafale 2012	frequent	9 m. msl	34deg.35'11.9" N	77deg.39'45.9" W	400	Robert Thornhill	582	14	7	2011
NCSC	Sabatia difformis (L.) Druce	Gentianaceae	Eudicots	sensu Weakley 2012	U.S.A.	NC	Pender	in pine savannas along Flo Road, approximately 0.4-1.2 km southeast of junction with Half Moon Road	Sandy Pine Savanna (Rush Featherling subtype) sensu Schafale 2012	frequent	9 m. msl	34deg.35'11.9" N	77deg.39'45.9" W	400	Robert Thornhill	583	14	7	2011
NCSC	Sabatia difformis (L.) Druce	Gentianaceae	Eudicots	sensu Weakley 2012	U.S.A.	NC	Pender	in pine savannas along Flo Road, approximately 0.4-1.2 km southeast of junction with Half Moon Road	Sandy Pine Savanna (Rush Featherling subtype) sensu Schafale 2012	frequent	9 m. msl	34deg.35'11.9" N	77deg.39'45.9" W	400	Robert Thornhill	584	14	7	2011
NCSC	Sabatia difformis (L.) Druce	Gentianaceae	Eudicots	sensu Weakley 2012	U.S.A.	NC	Pender	in savanna on east side of Alligator Lake Road, immediately south of junction with Flo Road	Very Wet Loamy Pine Savanna (sensu Schafale 2012)	frequent	8 m. msl	34deg.34'54.2" N	77deg.38'38.5" W	50	Robert Thornhill	706	21	7	2011
NCSC	Sabatia difformis (L.) Druce	Gentianaceae	Eudicots	sensu Weakley 2012	U.S.A.	NC	Pender	in Spodosol savanna on east side of Half Moon Road, 0.5-1.5 km southwest of intersection of Half Moon Road and Flo Road	Sandy Pine Savanna (Typic subtype) sensu Schafale 2012	frequent	9 m. msl	34deg.35'15.7" N	77deg.40'16.0" W	500	Robert Thornhill	485	10	6	2011
NCSC	Sabatia difformis (L.) Druce	Gentianaceae	Eudicots	sensu Weakley 2012	U.S.A.	NC	Pender	in Spodosol savanna on east side of Half Moon Road, 0.5-1.5 km southwest of intersection of Half Moon Road and Flo Road	Sandy Pine Savanna (Typic subtype) sensu Schafale 2012	frequent	9 m. msl	34deg.35'15.7" N	77deg.40'16.0" W	500	Robert Thornhill	521	21	6	2011
NCSC	Sabatia difformis (L.) Druce	Gentianaceae	Eudicots	sensu Weakley 2012	U.S.A.	NC	Pender	in Spodosol savanna on east side of Half Moon Road, 0.5-1.5 km southwest of intersection of Half Moon Road and Flo Road	Sandy Pine Savanna (Typic subtype) sensu Schafale 2012	frequent	9 m. msl	34deg.35'15.7" N	77deg.40'16.0" W	500	Robert Thornhill	525	21	6	2011
NCSC	Sabatia difformis (L.) Druce	Gentianaceae	Eudicots	sensu Weakley 2012	U.S.A.	NC	Pender	in large savanna immediately south of intersection of Flo Road and Fill Road	Wet Loamy Pine Savanna (sensu Schafale 2012)	frequent	8 m. msl	34deg.34'54.7" N	77deg.39'9.0" W	100	Robert Thornhill	420	9	6	2011		y
NCSC	Sabatia difformis (L.) Druce	Gentianaceae	Eudicots	sensu Weakley 2012	U.S.A.	NC	Pender	in savanna immediately south of Flo Road, approximately 0.3km east of intersection of Flo Road and Fill Road	Wet Loamy Pine Savanna (sensu Schafale 2012)	frequent	8 m. msl	34deg.34'56.3" N	77deg.38'48.6" W	50	Robert Thornhill	555	28	6	2011
NCSC	Sabatia gentianoides Elliott	Gentianaceae	Eudicots	sensu Weakley 2012	U.S.A.	NC	Pender	in pine savanna on northeast corner of intersection of Flo Road and Fill Road	Very Wet Loamy Pine Savanna (sensu Schafale 2012)	infrequent	8 m. msl	34deg.35'0.1" N	77deg.38'59.2" W	50	Robert Thornhill	1450	26	7	2012
NCSC	Proserpinaca pectinata Lam.	Haloragaceae	Eudicots	sensu Weakley 2012	U.S.A.	NC	Pender	in borrow pit in Spodosol savanna/flatwood matrix on west side of Half Moon Road, approximately 1 km southwest of intersection of Half Moon Road and Flo Road	borrow pit in pine savanna (Sandy Pine Savanna (Typic subtype) sensu Schafale 2012	frequent	9 m. msl	34deg.35'1.3" N	77deg.40'31.6" W	20	Robert Thornhill	509	10	6	2011
[truncated: 345 more rows]
