# Supplementary material for: Guide to the Vascular Flora of the Savannas and Flatwoods of Shaken Creek Preserve and Vicinity (Pender & Onslow Counties, North Carolina, U.S.A.)
Source: Biodivers Data J. 2014 May 16;(2):e1099. doi: 10.3897/BDJ.2.e1099 (PMC4107865; doi:10.3897/BDJ.2.e1099)
Supplement: Supplementary material 7 — Checklist of Taxa [file biodiversity_data_journal-2-e1099-s007.xls]

## Sheet: Taxa
Clade	Taxon_Local_ID	Kingdom	Subkingdom	Phylum	Subphylum	Superclass	Class	Subclass	Superorder	Order	Suborder	Infraorder	Superfamily	Family	Subfamily	Tribe	Subtribe	Genus	Subgenus	Species	Subspecies	Variety	Form	Authorship	Synonymy	Feeds on	Symbiotic with	Parasite of	Host of	Native Status	Conservation Status	Distribution	Horizon	Notes
F+FA	1	Plantae		Pteridophyta			Filicopsida			Polypodiales				Blechnaceae				Woodwardia		areolata				(L.) Moore								Wet pine savannas (SPS-RF, VWLPS), borrow pits, ditches.		Occasional. May-Sep. Thornhill 752, 876 (NCSU). Specimens seen in the vicinity: Sandy Run [Hancock]: Taggart SARU 78 (WNC!). [= RAB, FNA, Weakley]
F+FA	2	Plantae		Pteridophyta			Filicopsida			Polypodiales				Blechnaceae				Woodwardia		virginica				(L.) Sm.								Wet pine flatwoods (WPF-T), wet pine savannas (SPS-T, SPS-RF, WLPS, VWLPS), borrow pits, ditches, roadsides.		Frequent. Jun–Sep. Thornhill 570, 597, 616, 798 (NCSC). Specimens seen in the vicinity: Sandy Run [Hancock]: Taggart SARU 149 (WNC!). [= RAB, FNA, Weakley]
F+FA	3	Plantae		Pteridophyta			Filicopsida			Polypodiales				Dennstaedtiaceae				Pteridium		aquilinum		pseudocaudatum		(Clute) A. Heller								Pine/scrub oak sandhills (PSOS-MT), mesic pine savannas (MPS-CP), wet pine flatwoods (WPF-T), wet pine savannas (SPS-T, SPS-RF, WLPS, VWLPS), roadsides.		Abundant. Jul–Sep. Thornhill 836, 1425 (NCSC). Specimens seen in the vicinity: Sandy Run [Hancock]: Taggart SARU 148 (WNC!). [= RAB, FNA; = P. aquilinum (L.) Kuhn ssp. pseudocaudatum (Clute) Hultén sensu Weakley]
F+FA	4	Plantae		Pteridophyta			Filicopsida			Polypodiales				Lycopodiaceae				Lycopodiella		alopecuroides				(L.) Cranfill								Wet pine savannas (SPS-T, SPS-RF, WLPS, VWLPS).		Frequent. Jul–Sep. Thornhill 232, 785, 850 (NCSC). Specimens seen in the vicinity: Sandy Run [Hancock]: Taggart SARU 509 (WNC!). [< Lycopodium alopecuroides L. sensu RAB; = FNA, Weakley]
F+FA	5	Plantae		Pteridophyta			Filicopsida			Polypodiales				Lycopodiaceae				Lycopodiella		appressa				(Chapm.) Cranfill								Wet pine savannas (SPS-T, SPS-RF).		Occasional. Jul–Sep. Thornhill 810, 851 (NCSC). Specimens seen in the vicinity: Sandy Run [Hancock]: Taggart SARU 515 (WNC!). [= Lycopodium appressum (Chapm.) F.E. Lloyd & Underw. sensu RAB; = FNA, Weakley]
F+FA	6	Plantae		Pteridophyta			Filicopsida			Polypodiales				Lycopodiaceae				Pseudolycopodiella		caroliniana				(L.) Holub								Wet pine savannas (SPS-RF, WLPS).		Occasional. Jul–Sep. Thornhill 758, 958 (NCSC). Specimens seen in the vicinity: Sandy Run [Hancock]: Taggart SARU 508 (WNC!).
F+FA	7	Plantae		Pteridophyta			Filicopsida			Polypodiales				Osmundaceae				Osmunda		spectabilis				Willd.								Wet pine flatwoods (WPF-T), wet pine savannas (WLPS, VWLPS), ditches.		Occasional. Mar–Jun. Thornhill 202, 300 (NCSC). Specimens seen in the vicinity: Sandy Run [Hancock]: Taggart SARU 112 (WNC!). [= O. regalis L. var. spectabilis (Willd.) A. Gray sensu RAB, FNA; = Weakley]
F+FA	8	Plantae		Pteridophyta			Filicopsida			Polypodiales				Osmundaceae				Osmundastrum		cinnamomeum				(L.) C. Presl								Wet pine flatwoods (WPF-T), wet pine savannas (SPS-T, SPS-RF, WLPS, VWLPS).		Frequent. Mar–May. Thornhill 201, 223, 255 (NCSC). Specimens seen in the vicinity: Sandy Run [Hancock]: Taggart SARU 75 (WNC!); Sandy Run [Neck]: Wilbur 67806 (DUKE!; as Osmunda cinnamomea). [= Osmunda cinnamomea L. sensu RAB, FNA; = Weakley]
F+FA	9	Plantae		Pteridophyta			Filicopsida			Polypodiales				Selaginellaceae				Selaginella		apoda				(L.) C. Morren								Wet pine savannas (WLPS, VWLPS).		Infrequent. Jun–Oct. Thornhill 1480 (NCSC). Specimens seen in the vicinity: Sandy Run [Hancock]: Taggart SARU 124 (WNC!); Sandy Run [Neck]: Sorrie 6385 (NCU!). [= RAB, FNA, Weakley]
Gymno	10	Plantae		Coniferophyta			Pinopsida			Pinales				Cuppressaceae				Chamaecyparis		thyoides				(L.) Britton, Sterns & Poggenb.								Depressions in pine savannas, ditches, borrow pits.		Rare. Mar–Apr; Oct–Nov. Thornhill 757 (NCSC). Specimens seen in the vicinity: Sandy Run [Hancock]: Sieren 3676 (WNC!), Taggart SARU 69 (WNC!); Sandy Run [O’Berry]: Weakley 7219 (NCU!). [= RAB, FNA, Weakley]
Gymno	11	Plantae		Coniferophyta			Pinopsida			Pinales				Cuppressaceae				Juniperus		virginiana		virginiana		L.								Thickets along roadside edges of wet pine savannas.		Rare. Jan–Feb; Oct–Nov. Thornhill 1381 (NCSC). [= J. virginiana L. sensu RAB; = FNA, Weakley]
Gymno	12	Plantae		Coniferophyta			Pinopsida			Pinales				Cuppressaceae				Taxodium		ascendens				Brongn.								Wet pine savannas (WLPS, VWLPS), ditches, borrow pits.		Frequent. Mar–Apr; Oct. Thornhill 474 (NCSC). Specimens seen in the vicinity: Sandy Run [Neck]: Wilbur 53703 (DUKE!); Sandy Run [O’Berry]: Taggart SARU 245 (WNC!). [= RAB; = T. distichum L. var. imbricarium (Nutt.) Croom sensu FNA; = Weakley]
Gymno	13	Plantae		Coniferophyta			Pinopsida			Pinales				Pinaceae				Pinus		elliottii		elliottii		Engelm.						nonnative		Wet pine flatwoods (WPF-T).		Infrequent. Jan–Feb.; Oct–Nov. Planted on site as a timber tree prior to site’s purchase by The Nature Conservancy. Thornhill 1554 (NCSC). [< P. elliottii Engelm. sensu RAB; = FNA, Weakley]
Gymno	14	Plantae		Coniferophyta			Pinopsida			Pinales				Pinaceae				Pinus		palustris				Mill.								Pine/scrub oak sandhills (PSOS-MT), mesic pine savannas (MPS-CP), wet pine flatwoods (WPF-T), wet pine savannas (SPS-T, SPS-RF, WLPS, VWLPS).		Abundant. Mar–Apr; Sep–Oct. Thornhill 1066, 1067 (NCSC). Specimens seen in the vicinity: Sandy Run [O’Berry]: Taggart SARU 20 (WNC!). [= RAB, FNA, Weakley]
Gymno	15	Plantae		Coniferophyta			Pinopsida			Pinales				Pinaceae				Pinus		serotina				Michx.								Wet pine flatwoods (WPF-T), wet pine savannas (SPS-T, SPS-RF, WLPS, VWLPS).		Abundant. Apr; Aug (or any time of the year in response to fire). Thornhill 472 (NCSC). Specimens seen in the vicinity: Sandy Run [Neck]: Wilbur 63779 (DUKE!); Sandy Run [O’Berry]: Taggart SARU 18 (WNC!). [= RAB, FNA, Weakley]
Gymno	16	Plantae		Coniferophyta			Pinopsida			Pinales				Pinaceae				Pinus		taeda				L.								Wet pine flatwoods (WPF-T), wet pine savannas (WLPS, VWLPS).		Frequent. Mar–Apr; Oct–Nov. Thornhill 471, 1026 (NCSC). Specimens seen in the vicinity: Sandy Run [Hancock]: Taggart SARU 53 (WNC!). [= RAB, FNA, Weakley]
Mono	17	Plantae		Magnoliophyta			Liliopsida			Liliales				Agavaceae				Yucca		filamentosa				L.								Mesic pine savannas (MPS-CP).		Infrequent. Late Apr–early Jun; Sep–Oct. Thornhill 1011 (NCSC). Specimens seen in the vicinity: Sandy Run [Patterson]: Taggart SARU 157 (WNC!). [= Y. filamentosa L. var. filamentosa sensu RAB; = FNA, Weakley]
Mono	18	Plantae		Magnoliophyta			Liliopsida			Asparagales				Amaryllidaceae				Allium		species 1											SR-L, FSC; S1S2, G1G2.	Wet pine savannas (VWLPS).		Rare. Late Aug–early Oct; late Sep–Nov. Thornhill 839, 1009 (NCSC). Specimens seen in the vicinity: Highway 50: LeBlond 6362 (NCU!); Sandy Run: LeBlond 5541, 6361, 6363, 6370, 6377 (NCU!), Leonard 7581, 7582, 7584 (NCU!), Taggart SARU 452 (WNC!). [= Weakley]
Mono	19	Plantae		Magnoliophyta			Liliopsida			Poales				Bromeliaceae				Tillandsia		usneoides				(L.) L.								Swampy margins of wet pine savannas (WLPS, VWLPS).		Infrequent. Apr–Jun. Thornhill 190 (NCSC). Specimens seen in the vicinity: Sandy Run [Hancock]: Taggart SARU 436 (WNC!). [= RAB, FNA, Weakley]
Mono	20	Plantae		Magnoliophyta			Liliopsida			Dioscoreales				Burmanniaceae				Burmannia		capitata				(Walter ex J.F. Gmel.) Mart.								Depressions in wet pine flatwoods (WPF-T), wet pine savannas (WLPS), borrow pits, roadsides.		Infrequent. Jul–Nov. Thornhill 1472 (NCSC). Specimens seen in the vicinity: Sandy Run [Hancock]: Taggart SARU 651 (WNC!). [= RAB, FNA, Weakley]
Mono	21	Plantae		Magnoliophyta			Liliopsida			Liliales				Colchicaceae				Uvularia		puberula				Michx.								Pine savannas.		Early Apr–early May; Aug–Oct. Not seen in Shaken Creek Preserve by the present author. Specimens seen in the vicinity: Sandy Run [Hancock]: Taggart SARU 46 (WNC!; as U. puberula var. nitida). [= U. pudica (Walter) Fernald sensu RAB; = FNA, Weakley]
Mono	22	Plantae		Magnoliophyta			Liliopsida			Poales				Cyperaceae				Bulbostylis		stenophylla				(Elliott) C.B. Clarke								Pine savannas.		Jul–Oct. Not seen in Shaken Creek Preserve by the present author. Specimens seen in the vicinity: Sandy Run [Neck]: Wilbur 53633 (DUKE!). [= RAB, FNA, Weakley]
Mono	23	Plantae		Magnoliophyta			Liliopsida			Poales				Cyperaceae				Carex		chapmanii				Steud.							W1; S3, G3.	Wet pine savannas (VWLPS).		Apr–May. Reported from Sandy Run by LeBlond (2000), but no specimens have been seen in Shaken Creek Preserve by the present author. [= RAB, FNA, Weakley]
Mono	24	Plantae		Magnoliophyta			Liliopsida			Poales				Cyperaceae				Carex		elliottii				Schwein. & Torr.								Depressions in wet pine savannas (SPS-T), borrow pits, ditches.		Infrequent. May–Jun. Thornhill 532, 1271 (NCSC). Specimens seen in the vicinity: Sandy Run [Hancock]: Taggart SARU 275 (WNC!). [= RAB, FNA, Weakley]
Mono	25	Plantae		Magnoliophyta			Liliopsida			Poales				Cyperaceae				Carex		glaucescens				Elliott								Wet pine flatwoods (WPF-T), wet pine savannas (SPS-T, SPS-RF, WLPS, VWLPS), borrow pits, ditches.		Frequent. Jul–Sep. Thornhill 12, 620, 692, 1100 (NCSC). Specimens seen in the vicinity: Sandy Run [Hancock]: Taggart SARU 486 (WNC!); Sandy Run [Neck]: Wilbur 53685 (DUKE!). [= RAB, FNA, Weakley]
Mono	26	Plantae		Magnoliophyta			Liliopsida			Poales				Cyperaceae				Carex		leptalea	harperi			(Fernald) Calder & Roy L. Taylor								Wet pine savannas (VWLPS).		May–Jun. Reported from Sandy Run [Watkins] by LeBlond (2000), but no specimens have been seen in Shaken Creek Preserve (in the pertinent habitats) by the present author. [< C. leptalea Wahlenb. sensu RAB; = FNA; = C. leptalea Wahlenb. var. harperi (Fernald) sensu Weakley]
Mono	27	Plantae		Magnoliophyta			Liliopsida			Poales				Cyperaceae				Carex		lonchocarpa				Willd. ex Spreng.								Wet pine savannas (WLPS, VWLPS).		Occasional. May–Jul. Thornhill 369, 456, 462, 463, 1395 (NCSC). Specimens seen in the vicinity: Sandy Run [Neck]: Taggart SARU 606 (WNC!). [= C. folliculata L. var. australis L.H. Bailey sensu RAB; = FNA, Weakley]
Mono	28	Plantae		Magnoliophyta			Liliopsida			Poales				Cyperaceae				Carex		lutea				LeBlond							State E, Fed E; S2, G2.	Wet pine savannas (VWLPS).		Infrequent. May–early Jun. Sorrie 10149 (NCU!), Thornhill 1277 (NCSC). Specimens seen in the vicinity: Sandy Run: Taggart SARU 88, SARU 701, SARU 702, SARU 703 (WNC!). [= FNA, Weakley]
Mono	29	Plantae		Magnoliophyta			Liliopsida			Poales				Cyperaceae				Carex		physorhyncha				Liebm. ex Steud.							W1; S2S3, G5T5.	Dry woodlands.		Late Mar–May. Reported from Sandy Run by LeBlond and Weakley (1991), but no specimens have been seen in Shaken Creek Preserve by the present author. [= RAB; = C. albicans Willd. ex Spreng. var. australis (L.H. Bailey) Rettig sensu FNA; = Weakley]
Mono	30	Plantae		Magnoliophyta			Liliopsida			Poales				Cyperaceae				Carex		striata				Michx.								Wet pine savannas (SPS-RF, WLPS, VWLPS), borrow pits, ditches.		Occasional. May–Jun. Thornhill 1272, 1280, 1290 (NCSC). Specimens seen in the vicinity: Sandy Run [Neck]: Taggart SARU 607 (WNC!; as C. striata var. brevis). [= C. walteriana L.H. Bailey sensu RAB; = FNA; > C. striata var. brevis L.H. Bailey, C. striata var striata sensu Weakley]
Mono	31	Plantae		Magnoliophyta			Liliopsida			Poales				Cyperaceae				Carex		venusta				Dewey								Boggy depressions in pine savannas.		May–Jun. Not seen in Shaken Creek Preserve (in perintent habitats) by the present author. Specimens seen in the vicinity: Sandy Run [Hancock]: Sorrie 6395 (NCU!; as C. oblita). [= RAB, FNA; > C. venusta Dewey, C. oblita Steud. sensu Weakley]
Mono	32	Plantae		Magnoliophyta			Liliopsida			Poales				Cyperaceae				Cladium		jamaicense				Crantz								Wet pine savannas (VWLPS).		Infrequent. Jul–Oct. Thornhill 1361 (NCSC). Specimens seen in the vicinity: Sandy Run [Neck]: Taggart SARU 575 (WNC!). [= RAB, FNA, Weakley]
Mono	33	Plantae		Magnoliophyta			Liliopsida			Poales				Cyperaceae				Cladium		mariscoides				(Muhl.) Torr.							SR-O; S3, G5.	Wet pine savannas (WLPS).		Rare. Jul–Sep. Reported from Shaken Creek Preserve by LeBlond (2000), but no specimens have been seen by the present author. [= RAB, FNA, Weakley]
Mono	34	Plantae		Magnoliophyta			Liliopsida			Poales				Cyperaceae				Cyperus		haspan				L.								Pine savannas.		Jul–Sep. Not seen in Shaken Creek Preserve (in perintent habitats) by the present author. Specimens seen in the vicinity: Sandy Run [Haw’s Run]: Taggart SARU 659 (WNC!); Sandy Run [Neck]: Wilbur 53635 (DUKE!). [= RAB, FNA, Weakley]
Mono	35	Plantae		Magnoliophyta			Liliopsida			Poales				Cyperaceae				Dulichium		arundinaceum		arundinaceum		(L.) Britton								Depressions in wet pine savannas (WLPS), ditches.		Infrequent. Jul–Oct. Thornhill 1387, 1532 (NCSC). Specimens seen in the vicinity: Sandy Run [RMK]: Taggart SARU 232 (WNC!). [< D. arundinaceum (L.) Britton sensu RAB; = FNA, Weakley]
Mono	36	Plantae		Magnoliophyta			Liliopsida			Poales				Cyperaceae				Eleocharis		baldwinii				(Torr.) Chapm.								Depressions in wet pine flatwoods (WPF-T), ditches, and borrow pits.		Infrequent. Jun–Oct. Thornhill 1462, 1512, 1523 (NCSC). [= RAB, FNA, Weakley]
Mono	37	Plantae		Magnoliophyta			Liliopsida			Poales				Cyperaceae				Eleocharis		equisetoides				(Elliott) Torr.							W1; S3, G4.	Borrow pits.		Rare. Jun–Sep. LeBlond 4988 (NCU!), Thornhill 279 (NCSC). [= RAB, FNA, Weakley]
Mono	38	Plantae		Magnoliophyta			Liliopsida			Poales				Cyperaceae				Eleocharis		microcarpa				Torr.								Depressions in wet pine flatwoods (WPF-T) and wet pine savannas (SPS-T, SPS-RF, WLPS, VWLPS), borrow pits, ditches.		Occasional. Jun–Sep. Thornhill 18, 505, 723, 1432 (NCSC). Specimens seen in the vicinity: Sandy Run [Hancock]: Taggart SARU 621 (WNC!). [< E. microcarpa Torr. sensu RAB; = FNA, Weakley]
Mono	39	Plantae		Magnoliophyta			Liliopsida			Poales				Cyperaceae				Eleocharis		obtusa				(Willd.) Schult.								Depressions in pine savannas, ditches, other wet, disturbed areas.		Jun–Oct. Not seen in Shaken Creek Preserve by the present author. Specimens seen in the vicinity: Sandy Run [Neck]: Wilbur 55285 (DUKE!). [< E. ovata R. Br. sensu RAB; = FNA, Weakley]
Mono	40	Plantae		Magnoliophyta			Liliopsida			Poales				Cyperaceae				Eleocharis		tuberculosa				(Michx.) Roem. & Schult.								Wet pine savannas (SPS-T, SPS-RF, VWLPS), ditches, roadsides.		Occasional. Jun–Sep. Thornhill 1305, 1493 (NCSC). Specimens seen in the vicinity: Sandy Run [Haw’s Run]: Taggart SARU 555 (WNC!). [= RAB, FNA, Weakley]
Mono	41	Plantae		Magnoliophyta			Liliopsida			Poales				Cyperaceae				Fimbristylis		puberula		puberula		(Michx.) Vahl								Wet pine savannas (SPS-T, SPS-RF, WLPS, VWLPS).		Infrequent. Jul–Sep. Thornhill 326, 373, 518 (NCSC). Specimens seen in the vicinity: Sandy Run [Hancock]: Taggart SARU 194 (WNC!); Sandy Run [Neck]: Levy s.n. (DUKE!). [< F. spadicea (L.) Vahl sensu RAB; = FNA, Weakley]
Mono	42	Plantae		Magnoliophyta			Liliopsida			Poales				Cyperaceae				Fuirena		breviseta				(Coville) Coville								Wet pine savannas (WLPS, VWLPS).		Infrequent. Jul–Oct. Thornhill 736, 737, 852 (NCSC). Specimens seen in the vicinity: Sandy Run [Haw’s Run]: Taggart SARU 381 (WNC!); Sandy Run [Neck]: Wilbur 53687 (DUKE!; as F. squarrosa). [< F. squarrosa Michx. sensu RAB; = FNA, Weakley]
Mono	43	Plantae		Magnoliophyta			Liliopsida			Poales				Cyperaceae				Fuirena		pumila				(Torr.) Spreng.								Wet pine savannas (WLPS).		Rare. Jul–Oct. Thornhill 1533 (NCSC). [= RAB, FNA, Weakley]
Mono	44	Plantae		Magnoliophyta			Liliopsida			Poales				Cyperaceae				Isolepis		carinata				Hook. & Arn. ex Torr.							SR-P; S1, G5.	Wet pine savannas (SPS-T), adjacent roadsides.		Rare. May–Jun. Thornhill 1263 (NCSC). [= Scirpus koilolepis (Steud.) Gleason sensu RAB; = FNA, Weakley]
Mono	45	Plantae		Magnoliophyta			Liliopsida			Poales				Cyperaceae				Kyllinga		odorata				Vahl								Disturbed areas in wet pine flatwoods (WPF-T), roadsides.		Infrequent. Jul–Sep. Thornhill 1363 (NCSC). Specimens seen in the vicinity: Sandy Run [Hancock]: Taggart SARU 442 (WNC!). [= Cyperus sesquiflorus (Torr.) Mattf. & Kük. sensu RAB; = FNA, Weakley]
Mono	46	Plantae		Magnoliophyta			Liliopsida			Poales				Cyperaceae				Rhynchospora		baldwinii				A. Gray								Wet pine flatwoods (WPF-T), wet pine savannas (SPS-T, WLPS, VWLPS)		Infrequent. Jul–Aug. Thornhill 629 (NCSC). [= RAB, FNA, Weakley]
Mono	47	Plantae		Magnoliophyta			Liliopsida			Poales				Cyperaceae				Rhynchospora		caduca				Elliott								Wet pine flatwoods (WPF-T), wet pine savannas (SPS-RF, WLPS, VWLPS).		Frequent. Jul–Sep. Thornhill 729, 733, 868, 959, 1345 (NCSC). Specimens seen in the vicinity: Sandy Run [Hancock]: Taggart SARU 369 (WNC!); Sandy Run [Neck]: Wilbur 53656, 53657, 53683 (DUKE!). [= RAB, FNA, Weakley]
Mono	48	Plantae		Magnoliophyta			Liliopsida			Poales				Cyperaceae				Rhynchospora		cephalantha		cephalantha		A. Gray								Wet pine flatwoods (WPF-T), wet pine savannas (SPS-T, SPS-RF, WLPS, VWLPS), ditches.		Frequent. Jul–Oct. Thornhill 9, 661, 721, 735, 783, 796, 822 (NCSC). Specimens seen in the vicinity: Sandy Run [Hancock]: Taggart SARU 385 (WNC!; as R. cephalantha var. pleiocephala); Sandy Run [Neck]: Taggart 81 (NCU; as R. cephalantha); Sandy Run [Patterson]: Taggart SARU 635 (WNC!). [< R. cephalantha sensu RAB, FNA; = Weakley]
Mono	49	Plantae		Magnoliophyta			Liliopsida			Poales				Cyperaceae				Rhynchospora		chalarocephala				Fernald & Gale								Wet pine savannas (SPS-T), adjacent roadsides.		Frequent. Jul–Sep. Thornhill 15, 814, 901 (NCSC). Specimens seen in the vicinity: Sandy Run [Hancock]: Taggart SARU 505 (WNC!); Sandy Run [Neck]: Wilbur 57612, 57615 (DUKE!). [= RAB, FNA, Weakley]
Mono	50	Plantae		Magnoliophyta			Liliopsida			Poales				Cyperaceae				Rhynchospora		chapmanii				M.A. Curtis								Wet pine savannas (SPS-T, SPS-RF, WLPS, VWLPS).		Occasional. Jul–Sep. Thornhill 777, 809, 1505 (NCSC). Specimens seen in the vicinity: Sandy Run [Hancock]: Taggart SARU 518 (WNC!); Sandy Run [Neck]: Wilbur 57616, 57622 (DUKE!). [= RAB, FNA, Weakley]
Mono	51	Plantae		Magnoliophyta			Liliopsida			Poales				Cyperaceae				Rhynchospora		ciliaris				(Michx.) C. Mohr								Wet pine savannas (SPS-T, SPS-RF, WLPS, VWLPS), wet pine flatwoods (WPF-T).		Frequent. Jul–Sep. Thornhill 397, 506, 511, 654 (NCSC). Specimens seen in the vicinity: Sandy Run [Hancock]: Taggart SARU 386 (WNC!); Sandy Run [Neck]: Wilbur 57609 (DUKE!). [= RAB, FNA, Weakley]
Mono	52	Plantae		Magnoliophyta			Liliopsida			Poales				Cyperaceae				Rhynchospora		colorata				(L.) H. Pfeiff.								Wet pine savannas (WLPS, VWLPS).		Infrequent. May–Sep. Thornhill 319, 328, 441, 484, 684 (NCSC). Specimens seen in the vicinity: Sandy Run [Hancock]: Taggart SARU 173 (WNC!). [= Dichromena colorata (L.) H. Pfeiff. sensu RAB; = FNA, Weakley]
Mono	53	Plantae		Magnoliophyta			Liliopsida			Poales				Cyperaceae				Rhynchospora		corniculata				(Lam.) A. Gray								Cypress savannas, other wetlands.		Jul–Sep. Reported from Sandy Run [Neck] by LeBlond and Weakley (1991), but no specimens have been seen in Shaken Creek Preserve by the present author. [= RAB, FNA; < R. corniculata (Lam.) A. Gray var. corniculata sensu Weakley]
Mono	54	Plantae		Magnoliophyta			Liliopsida			Poales				Cyperaceae				Rhynchospora		debilis				Gale								Pine savannas.		Jul–Sep. Not seen in Shaken Creek Preserve by the present author. Specimens seen in the vicinity: Sandy Run [Neck]: LeBlond 2260 (NCU!). [= RAB, FNA, Weakley]
Mono	55	Plantae		Magnoliophyta			Liliopsida			Poales				Cyperaceae				Rhynchospora		decurrens				Chapm.							State T, FSC; S1S2, G3G4.	Wet pine savannas (VWLPS).		Rare. Jul–Aug. Thornhill 1390 (NCSC). [= RAB, FNA, Weakley]
Mono	56	Plantae		Magnoliophyta			Liliopsida			Poales				Cyperaceae				Rhynchospora		distans				(Michx.) Vahl								Wet pine flatwoods (WPF-T), wet pine savannas (SPS-RF).		Infrequent. Jun–Sep. Thornhill 659 (NCSC). Specimens seen in the vicinity: Sandy Run [O’Berry]: Taggart SARU 516 (WNC!; as R. fascicularis var. distans). [< R. fascicularis (Michx.) Vahl sensu RAB, FNA; = Weakley]
Mono	57	Plantae		Magnoliophyta			Liliopsida			Poales				Cyperaceae				Rhynchospora		divergens				Chapm. ex M.A. Curtis							SR-P; S2, G4.	Pine savannas.		May–Sep. Not seen in Shaken Creek Preserve by the present author. Specimens seen in the vicinity: Sandy Run: LeBlond 4586 (NCU!), Taggart SARU 612 (WNC!). [= RAB, FNA, Weakley]
Mono	58	Plantae		Magnoliophyta			Liliopsida			Poales				Cyperaceae				Rhynchospora		fascicularis				(Michx.) Vahl								Wet pine flatwoods (WPF-T), wet pine savannas (SPS-T, SPS-RF).		Jun–Sep. Reported from Shaken Creek Preserve by LeBlond (2000), but no specimens have been seen by the present author. [< RAB, FNA; = Weakley]
Mono	59	Plantae		Magnoliophyta			Liliopsida			Poales				Cyperaceae				Rhynchospora		filifolia				A. Gray								Wet pine savannas (SPS-T, WLPS, VWLPS).		Frequent. Jul–Sep. Thornhill 396, 635, 697, 727, 811 (NCSC). [= RAB, FNA, Weakley]
Mono	60	Plantae		Magnoliophyta			Liliopsida			Poales				Cyperaceae				Rhynchospora		galeana				Naczi, W.M. Knapp & G. Moor							SR-P; S2S3, G3G4.	Wet pine savannas (SPS-RF).		Infrequent. Jul–Sep. LeBlond 6111 (NCU); Thornhill 784 (NCSC). Specimens seen in the vicinity: Sandy Run: Taggart SARU 666 (WNC!; as R. breviseta). [= R. breviseta (Gale) Channell sensu RAB, FNA; = Weakley]
Mono	61	Plantae		Magnoliophyta			Liliopsida			Poales				Cyperaceae				Rhynchospora		globularis				(Chapm.) Small								Wet pine savannas (VWLPS), adjacent roadsides.		Infrequent. Jun–Sep. Thornhill 252 (NCSC). [< RAB; = R. globularis (Chapm.) Small var. globularis sensu FNA; = Weakley]
Mono	62	Plantae		Magnoliophyta			Liliopsida			Poales				Cyperaceae				Rhynchospora		glomerata		glomerata		(L.) Vahl								Pine savannas.		Jul–Sep. Not seen in Shaken Creek Preserve by the present author. Specimens seen in the vicinity: Sandy Run [Neck]: Taggart SARU 533 (WNC!). [< R. glomerata (L.) Vahl sensu RAB, FNA; = Weakley]
Mono	63	Plantae		Magnoliophyta			Liliopsida			Poales				Cyperaceae				Rhynchospora		gracilenta				A. Gray								Wet pine savannas (SPS-RF, WLPS, VWLPS).		Occasional. Jul–Sep. Thornhill 626, 1096, 1103 (NCSC). Specimens seen in the vicinity: Sandy Run [Hancock]: Taggart SARU 473 (WNC!). [= RAB, FNA, Weakley]
Mono	64	Plantae		Magnoliophyta			Liliopsida			Poales				Cyperaceae				Rhynchospora		inexpansa				(Michx.) Vahl								Wet pine savannas (SPS-T, SPS-RF, WLPS), adjacent roadsides.		Frequent. Jul–Sep. Thornhill 633, 645, 652, 655, 695 (NCSC). Specimens seen in the vicinity: Sandy Run [Neck]: Wilbur 53640, 53670 (DUKE!); Sandy Run [O’Berry]: Taggart SARU 519 (WNC!). [= RAB, FNA, Weakley]
Mono	65	Plantae		Magnoliophyta			Liliopsida			Poales				Cyperaceae				Rhynchospora		latifolia				(Baldwin) W.W. Thomas								Wet pine savannas (WLPS, VWLPS), ditches, borrow pits.		Occasional. May–Sep. Thornhill 11, 356, 451, 529 (NCSC). Specimens seen in the vicinity: Sandy Run [Haw’s Run]: Taggart SARU 185 (WNC!); Sandy Run [Neck]: Levy s.n. (DUKE!; as Dichromena latifolia), Wilbur 53697 (DUKE!; as Dichromena latifolia). [= Dichromena latifolia Baldwin ex Elliott sensu RAB; = FNA, Weakley]
Mono	66	Plantae		Magnoliophyta			Liliopsida			Poales				Cyperaceae				Rhynchospora		macrostachya				Torr. ex A. Gray								Wet pine savannas (WLPS), borrow pits.		Infrequent. Jul–Sep. Thornhill 918 (NCSC). Specimens seen in the vicinity: Sandy Run [Haw’s Run]: Taggart SARU 256 (WNC!; as R. macrostachya var. macrostachya); Sandy Run [Neck]: Wilbur 53684 (DUKE!). [= RAB, FNA, Weakley]
Mono	67	Plantae		Magnoliophyta			Liliopsida			Poales				Cyperaceae				Rhynchospora		microcarpa				Baldwin ex A. Gray							SR-P; S2, G5.	Wet pine savannas (VWLPS).		Infrequent. Jul–Aug. Thornhill 517, 731 (NCSC). [= RAB, FNA, Weakley]
Mono	68	Plantae		Magnoliophyta			Liliopsida			Poales				Cyperaceae				Rhynchospora		microcephala				(Britton) Britton ex Small								Pine savannas.		Jul–Oct. Not seen in Shaken Creek Preserve by the present author. Specimens seen in the vicinity: Sandy Run [Neck]: LeBlond 2387 (NCU!). [= RAB, FNA, Weakley]
Mono	69	Plantae		Magnoliophyta			Liliopsida			Poales				Cyperaceae				Rhynchospora		mixta				Britton								Depressions in wet pine savannas (VWLPS), ditches.		Rare. Jun–Aug. More commonly a species of swamps and marshes, R. mixta was reported from savannas in Sandy Run by LeBlond (1999). A specimen (Thornhill 1407, NCSC) was collected in a swamp in Shaken Creek Preserve by the present author, but no specimens have been seen in savannas. [= RAB, FNA, Weakley]
Mono	70	Plantae		Magnoliophyta			Liliopsida			Poales				Cyperaceae				Rhynchospora		nitens				(Vahl) A. Gray							W1; S3, G4?.	Wet pine savannas (WLPS), ditches, borrow pits.		Occasional. Jul–Aug. Thornhill 17, 931 (NCSC). Specimens seen in the vicinity: Sandy Run: Taggart SARU 415 (WNC!). [= Psilocarya nitens (Vahl) Alph. Wood sensu RAB; = FNA, Weakley]
Mono	71	Plantae		Magnoliophyta			Liliopsida			Poales				Cyperaceae				Rhynchospora		oligantha				A. Gray							W1; S3, G4.	Pine savannas.		Jul–Aug. Not seen in Shaken Creek Preserve by the present author. Specimens seen in the vicinity: Sandy Run: Taggart SARU 554 (WNC!). [= RAB, FNA, Weakley]
Mono	72	Plantae		Magnoliophyta			Liliopsida			Poales				Cyperaceae				Rhynchospora		pallida				M.A. Curti							W1; S3, G3.	Wet pine flatwoods (WPF-T), wet pine savannas (SPS-T, SPS-RF, WLPS).		Infrequent. Jul–Sep. Thornhill 14, 663 (NCSC). Specimens seen in the vicinity: Sandy Run: Taggart SARU 215 (WNC!). [= RAB, FNA, Weakley]
Mono	73	Plantae		Magnoliophyta			Liliopsida			Poales				Cyperaceae				Rhynchospora		pinetorum				Britton & Small							SR-T; S2, G5?T3?.	Wet pine savannas (VWLPS).		Infrequent. Jul–Sep. Thornhill 515 (NCSC). Specimens seen in the vicinity: Sandy Run: Taggart SARU 473 (WNC!). [< R. globularis (Chapm.) Small sensu RAB; = R. globularis (Chapm.) Small var. pinetorum (Britton & Small) Gale sensu FNA; = Weakley]
Mono	74	Plantae		Magnoliophyta			Liliopsida			Poales				Cyperaceae				Rhynchospora		plumosa				Elliott								Wet pine flatwoods (WPF-T), wet pine savannas (SPS-T, SPS-RF, WLPS, VWLPS).		Frequent. Jul–Aug. Thornhill 313, 357, 443, 467, 468, 726, 772, 778, 929 (NCSC). Specimens seen in the vicinity: Sandy Run [Hancock]: Taggart SARU 239 (WNC!); Sandy Run [Neck]: Taggart 27 (NCU!); Wilbur 57623 (DUKE!). [= RAB, FNA, Weakley]
Mono	75	Plantae		Magnoliophyta			Liliopsida			Poales				Cyperaceae				Rhynchospora		pusilla				Chapm. ex M.A. Curtis								Wet pine savannas (SPS-T, VWLPS), adjacent roadsides.		Occasional. Jun–Sep. Thornhill 24, 504, 507, 566, 860 (NCSC). Specimens seen in the vicinity: Sandy Run [Hancock]: Taggart SARU 372 (WNC!). [= R. intermixta C. Wright sensu RAB; = FNA, Weakley]
Mono	76	Plantae		Magnoliophyta			Liliopsida			Poales				Cyperaceae				Rhynchospora		rariflora				(Michx.) Elliott								Wet pine savannas (WLPS, VWLPS).		Occasional. Jul–Sep. Thornhill 516, 579, 1102, 1355 (NCSC). [= RAB, FNA, Weakley]
Mono	77	Plantae		Magnoliophyta			Liliopsida			Poales				Cyperaceae				Rhynchospora		scirpoides				(Torr.) Griseb.							W1; S3, G4.	Pine savannas.		Jul–Sep. Not seen in Shaken Creek Preserve by the present author. Specimens seen in the vicinity: Sandy Run: Wilbur 57613 (DUKE!), Wilbur 57619 (DUKE!). [= Psilocarya scirpoides Torr. sensu RAB; = FNA, Weakley]
Mono	78	Plantae		Magnoliophyta			Liliopsida			Poales				Cyperaceae				Rhynchospora		thornei				Kral							SC-V, FSC; S2, G3.	Wet pine savannas (VWLPS), adjacent roadsides.		Infrequent. Jul–Sep. LeBlond 6127 (NCU!). Specimens seen in the vicinity: Sandy Run: LeBlond 2851 (DUKE!), LeBlond 5514 (NCSC!), Taggart SARU 634 (WNC!). [= FNA, Weakley]
Mono	79	Plantae		Magnoliophyta			Liliopsida			Poales				Cyperaceae				Rhynchospora		torreyana				A. Gray								Wet pine savannas (WLPS, VWLPS).		Occasional. Jul–Sep. Thornhill 8, 775, 779 (NCSC). Specimens seen in the vicinity: Sandy Run [Haw’s Run]: Taggart SARU 317 (WNC!); Sandy Run [Neck]: Wilbur 53638, 53646, 53647 (DUKE!). [= RAB, FNA, Weakley]
Mono	80	Plantae		Magnoliophyta			Liliopsida			Poales				Cyperaceae				Rhynchospora		wrightiana				Boeck.							W1; S3, G5.	Wet pine savannas (SPS-T).		Infrequent. Jul–Sep. Thornhill 16 (NCSC). [= RAB, FNA, Weakley]
Mono	81	Plantae		Magnoliophyta			Liliopsida			Poales				Cyperaceae				Schoenoplectus		pungens		pungens		(Vahl) Palla								Wet pine savannas (WLPS), adjacent roadsides.		Infrequent. Mid-May–Jun; Jun–Sep. Thornhill 767 (NCSC). [< Scirpus americanus (Pers.) sensu RAB; = FNA, Weakley]
Mono	82	Plantae		Magnoliophyta			Liliopsida			Poales				Cyperaceae				Scirpus		cyperinus				(L.) Kunth								Depressions in wet pine flatwoods (WPF-T), borrow pits, ditches.		Rare. (Jul–)Aug–Sep. Thornhill 543, 1061 (NCSC). Specimens seen in the vicinity: Sandy Run [Haw’s Run]: Taggart SARU 313 (WNC!); Sandy Run [Neck]: Wilbur 53662 (DUKE!). [= RAB, FNA, Weakley]
Mono	83	Plantae		Magnoliophyta			Liliopsida			Poales				Cyperaceae				Scirpus		lineatus				Michx.							State T; S2, G4.	Pine savannas.		May–Jul. Not seen in Shaken Creek Preserve by the present author. Specimens seen in the vicinity: Sandy Run: Taggart SARU 670 (WNC!). [= S. fontinalis R.M. Harper sensu RAB; = FNA, Weakley]
Mono	84	Plantae		Magnoliophyta			Liliopsida			Poales				Cyperaceae				Scleria		baldwinii				(Torr.) Steud.							State T; S2, G4.	Wet pine savannas (VWLPS).		Infrequent. Jun–Jul. Thornhill 433, 576, 1091 (NCSC). [= RAB, FNA, Weakley]
Mono	85	Plantae		Magnoliophyta			Liliopsida			Poales				Cyperaceae				Scleria		ciliata		ciliata		Michx.								Wet pine savannas (VWLPS), wet pine flatwoods (WPF-T).		Occasional. May–Aug. Thornhill 1138, 1318, 1514 (NCSC). [< S. ciliata Michx. sensu RAB; = FNA, Weakley]
Mono	86	Plantae		Magnoliophyta			Liliopsida			Poales				Cyperaceae				Scleria		ciliata		glabra		(Chapm.) Fairey								Wet pine flatwoods (WPF-T).		May–Aug. Reported from Shaken Creek Preserve by LeBlond (2000), but no specimens have been seen by the present author. [< S. ciliata Michx. sensu RAB; = FNA, Weakley]
Mono	87	Plantae		Magnoliophyta			Liliopsida			Poales				Cyperaceae				Scleria		georgiana				Core							W1; S3, G4.	Wet pine savannas (VWLPS).		Jun–Aug. Reported from Shaken Creek Preserve by LeBlond (2000), but no specimens have been seen by the present author. Specimens seen in the vicinity: Sandy Run: Taggart SARU 315 (WNC!). [= RAB, FNA, Weakley]
Mono	88	Plantae		Magnoliophyta			Liliopsida			Poales				Cyperaceae				Scleria		minor				(Britton) W. Stone								Wet pine savannas (SPS-T, SPS-RF, WLPS).		Infrequent. Jun–Aug. Thornhill 786, 1406, 1582 (NCSC). Specimens seen in the vicinity: Sandy Run [Hancock]: Taggart SARU 253 (WNC!); Sandy Run [Neck]: LeBlond 2058 (NCU!). [= RAB, FNA, Weakley]
Mono	89	Plantae		Magnoliophyta			Liliopsida			Poales				Cyperaceae				Scleria		muehlenbergii				Steud.								Wet pine savannas (SPS-RF, WLPS, VWLPS).		Occasional. Jun–Sep. Thornhill 927, 939, 1107 (NCSC). Specimens seen in the vicinity: Sandy Run [Haw’s Run]: Taggart SARU 667 (WNC!). [< S. reticularis Michx. sensu RAB; = FNA, Weakley]
Mono	90	Plantae		Magnoliophyta			Liliopsida			Poales				Cyperaceae				Scleria		pauciflora		caroliniana		(Willd.) Alph. Wood								Wet pine flatwoods (WPF-T), wet pine savannas (WLPS).		Occasional. Jun–Sep. Thornhill 1413 (NCSC). Specimens seen in the vicinity: Sandy Run [Hancock]: Taggart SARU 370 (WNC!). [< S. pauciflora Muhl. ex Willd. sensu RAB; = FNA, Weakley]
Mono	91	Plantae		Magnoliophyta			Liliopsida			Poales				Cyperaceae				Scleria		species 1											SR-L, FSC; S1, G1.	Wet pine savannas (VWLPS).		May–Sep. Not seen in Shaken Creek Preserve by the present author. Specimens seen in the vicinity: Sandy Run: LeBlond 5722B (NCU!), Taggart SARU 316 (WNC!). [= Weakley]
Mono	92	Plantae		Magnoliophyta			Liliopsida			Poales				Cyperaceae				Scleria		triglomerata				Michx.								Wet pine flatwoods (WPF-T).		Occasional. May–Sep. Thornhill 1321, 1322, 1323, 1360 (NCSC). Specimens seen in the vicinity: Sandy Run [Neck]: Taggart SARU 329 (WNC!). [< S. triglomerata Michx. sensu RAB, FNA; = Weakley]
Mono	93	Plantae		Magnoliophyta			Liliopsida			Poales				Cyperaceae				Scleria		verticillata				Muhl. ex Willd.							SR-P; S2, G5.	Pine savannas.		Jul–Sep. Not seen in Shaken Creek Preserve by the present author. Specimens seen in the vicinity: Sandy Run: LeBlond 2373 (NCU!). [= RAB, FNA, Weakley]
Mono	94	Plantae		Magnoliophyta			Liliopsida			Dioscoreales				Dioscoreaceae				Dioscorea		villosa				L.								Swampy margins of wet pine savannas (VWLPS).		Rare. Apr–Jun; Sep–Nov. Thornhill 975 (NCSC). Specimens seen in the vicinity: Sandy Run [Patterson]: Taggart SARU 501 (WNC!). [> D. villosa L. var. villosa, D. villosa L. var. hirticaulis (Bartlett) H.E. Ahles sensu RAB; = FNA, Weakley]
Mono	95	Plantae		Magnoliophyta			Liliopsida			Poales				Eriocaulaceae				Eriocaulon		compressum				Lam.								Pine savannas (SPS-RF).		Apr–Oct. Reported from Shaken Creek Preserve by LeBlond (2000), but no specimens have been seen by the present author. [= RAB, FNA, Weakley]
Mono	96	Plantae		Magnoliophyta			Liliopsida			Poales				Eriocaulaceae				Eriocaulon		decangulare		decangulare		L.								Depressions in wet pine flatwoods (WPF-T) and pine savannas (SPS-T, SPS-RF, WLPS, VWLPS).		Frequent. Jun–Oct. Thornhill 437, 466, 499, 512, 634, 660, 662, 717, 802 (NCSC). Specimens seen in the vicinity: Sandy Run [Neck]: Wilbur 55306 (DUKE!; as E. decangulare); Sandy Run [O’Berry]: Taggart SARU 165 (WNC!). [< E. decangulare L. sensu RAB; = FNA, Weakley]
Mono	97	Plantae		Magnoliophyta			Liliopsida			Poales				Eriocaulaceae				Lachnocaulon		anceps				(Walter) Morong								Depressions in wet pine flatwoods (WPF-T) and pine savannas (SPS-T, SPS-RF, WLPS, VWLPS).		Frequent. May–Oct. Thornhill 338, 438, 446, 452, 464, 498, 586 (NCSC). Specimens seen in the vicinity: Sandy Run [Hancock]: Taggart SARU 120 (WNC!); Sandy Run [Neck]: Wilbur 55298 (DUKE!); Sandy Run [Patterson]: Taggart SARU 217 (WNC!; as L. beyrichianum). [= RAB, FNA, Weakley]
Mono	98	Plantae		Magnoliophyta			Liliopsida			Poales				Eriocaulaceae				Syngonanthus		flavidulus				(Michx.) Ruhland							W1; S3, G5.	Pine savannas, flatwoods, and adjacent ditches.		May–Oct. Not seen in Shaken Creek Preserve by the present author. Specimens seen in the vicinity: Holly Shelter: LeGrand s.n. (NCU!). [= RAB, FNA, Weakley]
Mono	99	Plantae		Magnoliophyta			Liliopsida			Commelinales				Haemodoraceae				Lachnanthes		caroliniana				(Lam.) Dandy								Depressions in wet pine flatwoods (WPF-T) and pine savannas (SPS-T, SPS-RF, WLPS, VWLPS), ditches.		Frequent. Jun–early Sep; Sep–Nov. Thornhill 370, 447, 493, 494, 495, 496 (NCSC). Specimens seen in the vicinity: Sandy Run [Hancock]: Wyland s.n. (NCSC!); Sandy Run [Neck]: Wilbur 53676 (DUKE!); Sandy Run [RMK]: Taggart SARU 221 (WNC!). [= RAB, FNA, Weakley]
Mono	100	Plantae		Magnoliophyta			Liliopsida			Liliales				Heloniadaceae				Chamaelirium		luteum				(L.) A. Gray							W5B; S5, G5.	Ecotone between mesic pine savanna (MPS-CP) and pond pine woodland.		Rare. Mar–May; Sep–Nov. Thornhill 1274 (NCSC). [= RAB, FNA, Weakley]
Mono	101	Plantae		Magnoliophyta			Liliopsida			Asparagales				Hypoxidaceae				Hypoxis		curtissii				Rose								Wet pine savannas (SPS-RF, VWLPS).		Mar–Jun; May–Jul. Reported from Shaken Creek Preserve by LeBlond (2000), but no specimens have been seen by the present author. [= H. hirsuta (L.) Coville var. leptocarpa (Engelm. & A. Gray) Brackett sensu RAB; = FNA, Weakley]
Mono	102	Plantae		Magnoliophyta			Liliopsida			Asparagales				Hypoxidaceae				Hypoxis		hirsuta				(L.) Coville								Wet pine flatwoods (WPF-T), wet pine savannas (WLPS, VWLPS), adjacent roadsides.		Frequent. Mar–Jun; May–Jul. Thornhill 105, 140, 254 (NCSC). Specimens seen in the vicinity: Sandy Run [Patterson]: Taggart SARU 34 (WNC!). [= H. hirsuta (L.) Coville var. hirsuta sensu RAB; = FNA, Weakley]
Mono	103	Plantae		Magnoliophyta			Liliopsida			Asparagales				Hypoxidaceae				Hypoxis		sessilis				L.							SR-P; SH, G4.	Wet pine savannas (SPS-T, WLPS, VWLPS).		Occasional. Apr(–later, especially in response to fire); May(–later, especially in response to fire). The specimens collected by the author lack seeds, which are the most accurate means of distinguishing this species from H. wrightii. However, the floral and vegetative features (see key above) of the specimens match the descriptions of H. sessilis, and the specimens themselves appear similar to H…
Mono	104	Plantae		Magnoliophyta			Liliopsida			Asparagales				Hypoxidaceae				Hypoxis		wrightii				(Baker) Brackett								Wet pine savannas (SPS-T, WLPS), adjacent roadsides.		Occasional. Mar–Apr(–later, especially in response tofire); Apr–May(–later, especially in response to fire). Thornhill 36, 157, 244 (NCSC). Specimens seen in the vicinity: Sandy Run [Haw’s Run]: Taggart SARU 255 (WNC!). [= H. micrantha Pollard sensu RAB; = FNA, Weakley]
Mono	105	Plantae		Magnoliophyta			Liliopsida			Asparagales				Iridaceae				Iris		tridentata				Pursh								Wet pine flatwoods (WPF-T), wet pine savannas (SPS-T, SPS-RF, WLPS, VWLPS).		Occasional. Late May–Jun; Aug–Oct. Thornhill 317, 351, 380, 384, 1300 (NCSC). Specimens seen in the vicinity: Sandy Run [Hancock]: Taggart SARU 175 (WNC!); Sandy Run [Neck]: Levy s.n. (DUKE!), Wilbur 55316 (DUKE!). [= RAB, FNA, Weakley]
Mono	106	Plantae		Magnoliophyta			Liliopsida			Asparagales				Iridaceae				Iris		verna		verna		L.								Wet pine flatwoods (WPF-T), wet pine savannas (SPS-T, SPS-RF, WLPS, VWLPS).		Frequent. Mar–May; May–Jun. Thornhill 76, 77, 89, 99, 100 (NCSC). Specimens seen in the vicinity: Sandy Run [Hancock]: Taggart SARU 45 (WNC!); Sandy Run [Neck]: Wilbur 60085 (DUKE!). [= RAB, FNA, Weakley]
Mono	107	Plantae		Magnoliophyta			Liliopsida			Asparagales				Iridaceae				Iris		virginica		virginica		L.								Margins of wet pine savannas (WLPS, VWLPS) and adjacent swamps, borrow pits, ditches.		Occasional. Apr–May; Jul–Sep. Thornhill 241 (NCSC). Specimens seen in the vicinity: Sandy Run [Haw’s Run]: Taggart SARU 110 (WNC!). [< I. virginica L. sensu RAB, FNA, Weakley]
Mono	108	Plantae		Magnoliophyta			Liliopsida			Asparagales				Iridaceae				Sisyrinchium		albidum				Raf.								Pine savannas.		Mar–Jun; May–Jun. Reported from Sandy Run [Neck] by LeBlond and Weakley (1991), but no specimens have been seen in Shaken Creek Preserve by the present author. [< RAB; = FNA, Weakley]
Mono	109	Plantae		Magnoliophyta			Liliopsida			Asparagales				Iridaceae				Sisyrinchium		angustifolium				Mill.								Wet pine flatwoods (WPF-T), wet pine savannas (WLPS, VWLPS).		Occasional. Mar–Jun; May–Jul. Thornhill 195, 1401 (NCSC). [= RAB, FNA, Weakley]
Mono	110	Plantae		Magnoliophyta			Liliopsida			Asparagales				Iridaceae				Sisyrinchium		arenicola				E.P. Bicknell								Pine savannas and adjacent roadsides.		Mar–Jun; Jun–Aug. ). Not seen in Shaken Creek Preserve by the present author. Specimens seen in the vicinity: Sandy Run [Neck]: Wilbur 55244, 55281, 55323, 55324 (DUKE!). [< S. fuscatum E.P. Bicknell sensu FNA; = Weakley]
Mono	111	Plantae		Magnoliophyta			Liliopsida			Asparagales				Iridaceae				Sisyrinchium		atlanticum				E.P. Bicknell								Pine/scrub oak sandhills (PSOS-MT), wet pine flatwoods (WPF-T), wet pine savannas (WLPS, VWLPS).		Occasional. Mar–Jun; Jun–Aug. Thornhill 187, 196, 221, 372, 394 (NCSC). Specimens seen in the vicinity: Sandy Run [Patterson]: Taggart SARU 74 (WNC!). [= S. mucronatum Michx. var. atlanticum (E.P. Bicknell) H.E. Ahles sensu RAB; = FNA, Weakley]
Mono	112	Plantae		Magnoliophyta			Liliopsida			Asparagales				Iridaceae				Sisyrinchium		capillare				E.P. Bicknell								Wet pine flatwoods (WPF-T), wet pine savannas (WLPS, VWLPS).		Occasional. Mar–Jun; May–Jun. Thornhill 111, 127, 138, 191, 192, 194, 208 (NCSC). Specimens seen in the vicinity: Sandy Run [Hancock]: Taggart SARU 178 (WNC!). [< S. albidum Raf. sensu RAB; = FNA, Weakley]
Mono	113	Plantae		Magnoliophyta			Liliopsida			Poales				Juncaceae				Juncus		acuminatus				Michx.								Wet pine savannas (VWLPS).		May–Aug. Not seen in Shaken Creek Preserve by the present author. Specimens seen in the vicinity: Sandy Run [Neck]: Wilbur 55304 (DUKE!). [= RAB, FNA, Weakley]
Mono	114	Plantae		Magnoliophyta			Liliopsida			Poales				Juncaceae				Juncus		biflorus				Elliott								Wet pine flatwoods (WPF-T), wet pine savannas (SPS-T, SPS-RF, WLPS, VWLPS), adjacent roadsides.		Frequent. Jun–Oct. Thornhill 455, 461, 627, 853, 1372 (NCSC). Specimens seen in the vicinity: Sandy Run [Haw’s Run]: Taggart SARU 318 (WNC!); Sandy Run [Patterson]: Taggart SARU 632 (WNC!; as J. marginatus). [= RAB; < J. marginatus Rostk. sensu FNA; = Weakley]
Mono	115	Plantae		Magnoliophyta			Liliopsida			Poales				Juncaceae				Juncus		bufonius				L.								Margins of wet pine savannas (SPS-T) and adjacent roadsides.		Occasional. Jun–Nov. Thornhill 297 (NCSC). Specimens seen in the vicinity: Sandy Run [Hancock]: Taggart SARU 300 (WNC!; as J. bufonius var. bufonius); Sandy Run [Neck]: Wilbur 55313 (DUKE!). [= RAB, FNA, Weakley]
Mono	116	Plantae		Magnoliophyta			Liliopsida			Poales				Juncaceae				Juncus		canadensis				J. Gay ex Laharpe								Depressions and borrow pits in wet pine savannas (SPS-T).		Rare. Jul–Oct. Thornhill 19 (NCSC). Specimens seen in the vicinity: Sandy Run [Hancock]: Taggart SARU 618 (WNC!). [= RAB, FNA, Weakley]
Mono	117	Plantae		Magnoliophyta			Liliopsida			Poales				Juncaceae				Juncus		coriaceus				Mack.								Wet pine savannas (SPS-RF), adjacent roadsides.		Infrequent. Jun–Sep. Thornhill 957 (NCSC). Specimens seen in the vicinity: Sandy Run [Haw’s Run]: Taggart SARU 610 (WNC!). [= RAB, FNA, Weakley]
Mono	118	Plantae		Magnoliophyta			Liliopsida			Poales				Juncaceae				Juncus		dichotomus				Elliott								Wet pine savannas (WLPS, VWLPS), adjacent roadsides.		Frequent. Jun–Oct. Thornhill 286, 339, 340, 453, 575 (NCSC). Specimens seen in the vicinity: Sandy Run [Hancock]: Taggart SARU 259 (WNC!); Sandy Run [Neck]: Wilbur 53663 (DUKE!). [> J. dichotomus Elliott, J. platyphyllus (Wiegand) Fernald sensu RAB; = FNA, Weakley]
Mono	119	Plantae		Magnoliophyta			Liliopsida			Poales				Juncaceae				Juncus		diffusissimus				Buckley								Wet pine savannas (VWLPS).		May–Sep. Not seen in Shaken Creek Preserve by the present author. Specimens seen in the vicinity: Sandy Run [Neck]: Wilbur 55286 (DUKE!). [= RAB, FNA, Weakley]
Mono	120	Plantae		Magnoliophyta			Liliopsida			Poales				Juncaceae				Juncus		effusus	solutus			(Fernald & Wiegand) Hämet-Ahti								Disturbed areas in wet pine flatwoods (WPF-T), adjacent roadsides.		Rare. Jun–Sep. Thornhill 1339 (NCSC). Specimens seen in the vicinity: Sandy Run [Hancock]: Taggart SARU 257 (WNC!). (Fernald & Wiegand) Hämet-Ahti [< J. effusus L. sensu RAB, FNA; = Weakley]
Mono	121	Plantae		Magnoliophyta			Liliopsida			Poales				Juncaceae				Juncus		elliottii				Chapm.								Margins of wet pine savannas (WLPS) and adjacent roadsides.		Occasional. May–Sep. Thornhill 333, 336 (NCSC). [= RAB, FNA, Weakley]
Mono	122	Plantae		Magnoliophyta			Liliopsida			Poales				Juncaceae				Juncus		marginatus				Rostk.								Depressions in wet pine savannas (WLPS).		Infrequent. Jun–Sep. Thornhill 1374 (NCSC). Specimens seen in the vicinity: Sandy Run [Neck]: Wilbur 53693, 57628 (DUKE!). [= RAB; < J. marginatus Rostk. sensu FNA; = Weakley]
Mono	123	Plantae		Magnoliophyta			Liliopsida			Poales				Juncaceae				Juncus		megacephalus				M.A. Curtis								Wet pine savannas (VWLPS), adjacent roadsides.		Occasional. Jun–Aug. Thornhill 405, 519, 574, 732 (NCSC). Specimens seen in the vicinity: Sandy Run [Hancock]: Taggart SARU 298 (WNC!); Sandy Run [Neck]: Wilbur 53666, 55284 (DUKE!). [= RAB, FNA, Weakley]
Mono	124	Plantae		Magnoliophyta			Liliopsida			Poales				Juncaceae				Juncus		pelocarpus				E. Mey.								Depressions in wet pine savannas (VWLPS), borrow pits.		Infrequent. Jul–Oct. Thornhill 854, 933, 1125, 1191 (NCSC). Specimens seen in the vicinity: Sandy Run [Neck]: Wilbur 57693 (DUKE!; as J. abortivus). [> J. abortivus Chapm. sensu RAB; = FNA, Weakley]
Mono	125	Plantae		Magnoliophyta			Liliopsida			Poales				Juncaceae				Juncus		polycephalos				Michx.								Wet pine savannas (WLPS, VWLPS).		Frequent. Jul–Sep. Thornhill 247, 344, 780 (NCSC). Specimens seen in the vicinity: Sandy Run [Haw’s Run]: Taggart SARU 167 (WNC!); Sandy Run [Neck]: Wilbur 53714 (DUKE!). [= J. polycephalus Michx. sensu RAB, FNA; = Weakley]
Mono	126	Plantae		Magnoliophyta			Liliopsida			Poales				Juncaceae				Juncus		repens				Michx.								Depressions in wet pine savannas (SPS-RF), borrow pits.		Infrequent. Jun–Oct. Thornhill 410, 713 (NCSC). Specimens seen in the vicinity: Sandy Run [Hancock]: Taggart SARU 229 (WNC!). [= RAB, FNA, Weakley]
Mono	127	Plantae		Magnoliophyta			Liliopsida			Poales				Juncaceae				Juncus		scirpoides		compositus		R.M. Harper								Wet pine savannas (SPS-T, SPS-RF), adjacent roadsides.		Infrequent. Jun–Oct. Thornhill 934 (NCSC). [< J. scirpoides Lam. sensu RAB, FNA; = Weakley]
Mono	128	Plantae		Magnoliophyta			Liliopsida			Poales				Juncaceae				Juncus		scirpoides		scirpoides		Lam.								Wet pine flatwoods (WPF-T), wet pine savannas (SPS-T, WLPS), adjacent roadsides.		Occasional. Jun–Oct. Thornhill 781 (NCSC). Specimens seen in the vicinity: Sandy Run [Hancock]: Taggart SARU 633 (WNC!). [< J. scirpoides Lam. sensu RAB, FNA; = Weakley]
Mono	129	Plantae		Magnoliophyta			Liliopsida			Poales				Juncaceae				Juncus		trigonocarpus				Steud.								Borrow pits in pine savannas, ditches.		Infrequent. Jul–Oct. Thornhill 968 (NCSC). [= RAB, FNA, Weakley]
Mono	130	Plantae		Magnoliophyta			Liliopsida			Poales				Juncaceae				Juncus		validus		validus		Coville								Disturbed, wet areas in wet pine flatwoods (WPF-T), roadsides, ditches.		Occasional. Jul–Sep. Thornhill 465, 856 (NCSC). Specimens seen in the vicinity: Sandy Run [Neck]: Wilbur 57630 (DUKE!). [< J. validus Covile sensu RAB; = FNA, Weakley]
Mono	131	Plantae		Magnoliophyta			Liliopsida			Liliales				Liliaceae				Lilium		catesbaei				Walter								Wet pine flatwoods (WPF-T), wet pine savannas (SPS-T, SPS-RF, WLPS, VWLPS).		Occasional. Mid Jun–mid Sep; Sep–Nov. Thornhill 664, 673 (NCSC). Specimens seen in the vicinity: Sandy Run [Neck]: Taggart SARU 463 (WNC!). [> L. catesbaei L. var. catesbaei, L. catesbaei var. longii Fernald sensu RAB; = FNA, Weakley]
Mono	132	Plantae		Magnoliophyta			Liliopsida			Liliales				Melanthiaceae				Amianthium		muscitoxicum				(Walter) A. Gray								Wet pine savannas (WLPS).		Rare. May–Jul; Jul–Sep. Thornhill 1400 (NCSC). [= A. muscaetoxicum (Walter) A. Gray sensu RAB; = FNA, Weakley]
Mono	133	Plantae		Magnoliophyta			Liliopsida			Liliales				Melanthiaceae				Stenanthium		densum				(Desr.) Zomlefer & Judd								Wet pine savannas (SPS-T, SPS-RF, WLPS, VWLPS).		Frequent. Apr–early Jun; late May–Jul. Thornhill 275, 354, 487, 492 (NCSC). Specimens seen in the vicinity: Sandy Run [Hancock]: Taggart SARU 174 (WNC!); Sandy Run [Neck]: Levy s.n. (DUKE!; as Amianthium muscitoxicum), Wilbur 55317 (DUKE!; as Zigadenus densus). [= Zigadenus densus (Desr.) Fernald sensu RAB, FNA; = Weakley]
Mono	134	Plantae		Magnoliophyta			Liliopsida			Liliales				Melanthiaceae				Veratrum		virginicum				(L.) W.T. Aiton								Wet pine savannas (WLPS, VWLPS).		Infrequent. Jun–Aug; Aug–Oct. Thornhill 1010 (NCSC). Specimens seen in the vicinity: Sandy Run [Neck]: Taggart SARU 646 (WNC!); Sandy Run [Neck]: Wilbur 57658 (DUKE!). [= Melanthium virginicum L. sensu RAB, FNA; = Weakley]
Mono	135	Plantae		Magnoliophyta			Liliopsida			Liliales				Melanthiaceae				Zigadenus		glaberrimus				Michx.								Wet pine flatwoods (WPF-T), wet pine savannas (SPS-T, SPS-RF, WLPS).		Frequent. Late Jun–early Sep; Aug–Nov. Thornhill 678, 714, 797, 915 (NCSC). Specimens seen in the vicinity: Highway 50: Wilbur 9426 (DUKE!); Sandy Run [Neck]: Taggart SARU 365 (WNC!), Wilbur 53706, 57661 (DUKE!). [= RAB, FNA, Weakley]
Mono	136	Plantae		Magnoliophyta			Liliopsida			Dioscoreales				Nartheciaceae				Aletris		aurea				Walter								Wet pine savannas (WLPS, VWLPS).		Occasional. Mid May–Jul; Aug. Thornhill 426, 535, 536 (NCSC). Specimens seen in the vicinity: Sandy Run [Haw’s Run]: Taggart SARU 309 (WNC!); Sandy Run [Neck] Wilbur 53674 (DUKE!). [= RAB, FNA, Weakley]
Mono	137	Plantae		Magnoliophyta			Liliopsida			Dioscoreales				Nartheciaceae				Aletris		farinosa				L.							W5B; S5, G5.	Wet pine flatwoods (WPF-T), wet pine savannas (SPS-T, SPS-RF, WLPS, VWLPS).		Frequent. Late Apr–early Jun; Jul–Aug. Thornhill 248, 274, 291, 324, 382, 385 (NCSC). Specimens seen in the vicinity: Sandy Run: Taggart SARU 121 (WNC!), Wilbur 55294 (DUKE!). [= RAB, FNA, Weakley]
Mono	138	Plantae		Magnoliophyta			Liliopsida			Dioscoreales				Nartheciaceae				Aletris		lutea				Small								Wet pine savannas (VWLPS).		Rare. Apr–mid Jun; May–Jul. Thornhill 556 (NCSC). [= FNA, Weakley]
Mono	139	Plantae		Magnoliophyta			Liliopsida			Asparagales				Orchidaceae				Calopogon		barbatus				(Walter) Ames								Wet pine savannas (SPS-T, SPS-RF, WLPS, VWLPS).		Occasional. Apr–early May. Thornhill 162, 188, 189, 193, 206 (NCSC). Specimens seen in the vicinity: Sandy Run [Patterson]: Taggart SARU 105 (WNC!). [= RAB, FNA, Weakley]
Mono	140	Plantae		Magnoliophyta			Liliopsida			Asparagales				Orchidaceae				Calopogon		pallidus				Chapm.								Wet pine savannas (SPS-T, SPS-RF, WLPS, VWLPS).		Occasional. May–Jul. Thornhill 322, 399, 408 (NCSC). Specimens seen in the vicinity: Sandy Run [Hancock]: Taggart SARU 179 (WNC!). [= RAB, FNA, Weakley]
Mono	141	Plantae		Magnoliophyta			Liliopsida			Asparagales				Orchidaceae				Calopogon		tuberosus		tuberosus		(L.) Britton, Sterns & Poggenb.								Wet pine savannas (SPS-RF, WLPS, VWLPS).		Infrequent. Apr–Jul. Thornhill 421 (NCSC). Specimens seen in the vicinity: Sandy Run [Hancock]: Taggart SARU 187 (WNC!). [= C. pulchellus R. Br. sensu RAB; = FNA, Weakley]
Mono	142	Plantae		Magnoliophyta			Liliopsida			Asparagales				Orchidaceae				Cleistesiopsis		divaricata				(L.) Pansarin & F. Barros							W1; S3, G4.	Wet pine flatwoods (WPF-T), wet pine savannas (SPS-T, SPS-RF, WLPS, VWLPS).		Infrequent. May–mid Jun. Thornhill 386 (NCSC). Specimens seen in the vicinity: Sandy Run: Taggart SARU 587 (WNC!; as Cleistes divaricata). [< Cleistes divaricata (L.) Ames sensu RAB, FNA; = Weakley]
Mono	143	Plantae		Magnoliophyta			Liliopsida			Asparagales				Orchidaceae				Cleistesiopsis		oricamporum				P.M. Br.							W7; S2, G3?.	Wet pine flatwoods (WPF-T).		May–Jul. Reported from Shaken Creek Preserve by LeBlond (2000; as Cleistes bifaria (Fernald) Catling & Gregg), but no specimens have been seen by the present author. [< Cleistes divaricata (L.) Ames sensu RAB; < Cleistes bifaria (Fernald) Catling & Gregg sensu FNA; = Weakley]
Mono	144	Plantae		Magnoliophyta			Liliopsida			Asparagales				Orchidaceae				Platanthera		blephariglottis				(Willd.) Lindl.							W1; S3?, G4G5.	Wet pine savannas (SPS-RF).		Rare. Jul–Sep. Thornhill 1521 (NCSC). Specimens seen in the vicinity: Highway 50: Wilbur 9425 (DUKE!); Sandy Run: Taggart SARU 424 (WNC!). [< Habenaria blephariglottis (Willd.) Hook. var. blephariglottis sensu RAB; = P. blephariglottis (Willd.) Lindl. var. blephariglottis sensu FNA; = Weakley]
Mono	145	Plantae		Magnoliophyta			Liliopsida			Asparagales				Orchidaceae				Platanthera		ciliaris				(L.) Lindl.								Wet pine savannas (SPS-RF).		Jul–Sep. Reported from Shaken Creek Preserve by LeBlond (2000), but no specimens have been seen by the present author. Specimens seen in the vicinity: Sandy Run [Neck]: Taggart SARU 441 (WNC!). [= Habenaria ciliaris (L.) R. Br. sensu RAB; = FNA, Weakley]
Mono	146	Plantae		Magnoliophyta			Liliopsida			Asparagales				Orchidaceae				Platanthera		cristata				(Michx.) Lindl.								Wet pine savannas (SPS-RF).		Rare. Jul–Sep. Thornhill 1448 (NCSC). Specimens seen in the vicinity: Highway 50: Wilbur 9438 (DUKE!; as Habenaria cristata); Sandy Run [Hancock]: Taggart SARU 360 (WNC!). [= Habenaria cristata (Michx.) R. Br. sensu RAB; = FNA, Weakley]
Mono	147	Plantae		Magnoliophyta			Liliopsida			Asparagales				Orchidaceae				Platanthera		integra				(Nutt.) A. Gray ex L.C. Beck							SC-V; S2, G3G4.	Wet pine savannas (SPS-RF).		Jul–Sep. Reported from Shaken Creek Preserve by LeBlond (2000), but no specimens have been seen by the present author. Specimens seen in the vicinity: Highway 50: Wilbur 9428 (DUKE!; as Habenaria integra). [= Habenaria integra (Nutt.) Spreng. sensu RAB; = FNA, Weakley]
Mono	148	Plantae		Magnoliophyta			Liliopsida			Asparagales				Orchidaceae				Platanthera		nivea				(Nutt.) Luer							State T; S1, G5.	Pine savannas.		May–Sep. Reported from Sandy Run by LeBlond and Weakley (1991), but no specimens have been seen in Shaken Creek Preserve by the present author. [= Habenaria nivea (Nutt.) Spreng. sensu RAB; = FNA, Weakley]
Mono	149	Plantae		Magnoliophyta			Liliopsida			Asparagales				Orchidaceae				Pogonia		ophioglossoides				(L.) Ker Gawl.								Wet pine savannas (SPS-RF, VWLPS).		Rare. Mar–Jun. Thornhill 1286 (NCSC). Specimens seen in the vicinity: Sandy Run [Neck]: Taggart SARU 190 (WNC!). [= RAB, FNA, Weakley]
Mono	150	Plantae		Magnoliophyta			Liliopsida			Asparagales				Orchidaceae				Spiranthes		cernua				(L.) Rich.								Wet pine flatwoods (WPF-T), wet pine savannas (VWLPS).		Occasional. Jul–Nov. Thornhill 489, 1173, 1356 (NCSC). Specimens seen in the vicinity: Sandy Run [Haw’s Run]: Taggart SARU 543 (WNC!). [= S. cernua (L.) Rich. var. cernua sensu RAB; = FNA, Weakley]
Mono	151	Plantae		Magnoliophyta			Liliopsida			Asparagales				Orchidaceae				Spiranthes		eatonii				Ames ex P.M. Br.							State E; S2, G2G4.	Pine savannas (WLPS, VWLPS).		Infrequent. Feb–May. Thornhill 483, 1303, 1377 (NCSC). [= FNA, Weakley]
Mono	152	Plantae		Magnoliophyta			Liliopsida			Asparagales				Orchidaceae				Spiranthes		lacera		gracilis		(Bigelow) Luer								Pine savannas.		Aug–Sep. Not seen in Shaken Creek Preserve by the present author. Specimens seen in the vicinity: Sandy Run [Hancock]: Taggart SARU 285 (WNC!). [= S. gracilis (Bigelow) Beck var. gracilis sensu RAB; = FNA, Weakley]
Mono	153	Plantae		Magnoliophyta			Liliopsida			Asparagales				Orchidaceae				Spiranthes		laciniata				(Small) Ames							SC-V; S2, G4G5.	Pine savannas (WLPS).		Infrequent. May–Aug. Thornhill 390, 477 (NCSC). Specimens seen in the vicinity: Sandy Run [Hancock]: Taggart SARU 177 (WNC!). [= RAB, FNA, Weakley]
Mono	154	Plantae		Magnoliophyta			Liliopsida			Asparagales				Orchidaceae				Spiranthes		longilabris				Lindl.							State E; S1, G3.	Pine savannas.		Late Oct–Dec. Reported within a two-mile radius of Shaken Creek Preserve by the North Carolina Natural Heritage Program (2012; EO status “current,” accuracy “medium”), but no specimens have been seen in Shaken Creek Preserve by the present author. [= RAB, FNA, Weakley]
Mono	155	Plantae		Magnoliophyta			Liliopsida			Asparagales				Orchidaceae				Spiranthes		praecox				(Walter) S. Watson								Pine savannas (SPS-T, VWLPS).		Rare. Mar–Jul. Thornhill 1301 (NCSC). Specimens seen in the vicinity: Sandy Run [Neck]: Taggart SARU 589 (WNC!). [< S. praecox (Walter) S. Watson sensu RAB, FNA; = Weakley]
Mono	156	Plantae		Magnoliophyta			Liliopsida			Asparagales				Orchidaceae				Spiranthes		vernalis				Englem. & A. Gray								Pine savannas (WLPS) and adhacent roadsides.		Infrequent. Mar–Jul. Thornhill 1556 (NCSC). [= RAB, FNA, Weakley]
Mono	157	Plantae		Magnoliophyta			Liliopsida			Poales				Poaceae				Agrostis		altissima				(Walter) Tuck.							SR-T; S2, G4.	Wet pine savannas (WLPS, VWLPS).		Occasional. Oct–Nov. Thornhill 1060, 1076, 1132, 1164, 1192 (NCSC). Specimens seen in the vicinity: Sandy Run: LeBlond 2595, 4655, 4672 (NCU!), Taggart SARU 550 (WNC!). [< A. perennans (Walter) Tuck. sensu RAB, FNA; = Weakley]
Mono	158	Plantae		Magnoliophyta			Liliopsida			Poales				Poaceae				Agrostis		hyemalis				(Walter) Britton, Sterns, & Poggenb.								Wet pine savannas (SPS-T, WLPS), adjacent roadsides.		Occasional. Mar–Jul. Thornhill 226, 287, 299, 332, 406, 413 (NCSC). Specimens seen in the vicinity: Old Maple Hilll Road: Wilbur 55268 (DUKE!). [< A. hyemalis (Walter) Britton, Stern, & Poggenb. sensu RAB; = FNA, Weakley]
Mono	159	Plantae		Magnoliophyta			Liliopsida			Poales				Poaceae				Agrostis		perennans				(Walter) Tuck.								Wet pine savannas (WLPS), adjacent roadsides.		Infrequent. Aug–Oct. Thornhill 1021 (NCSC). [< A. perennans (Walter) Tuck. sensu RAB, FNA; = Weakley]
Mono	160	Plantae		Magnoliophyta			Liliopsida			Poales				Poaceae				Amphicarpum		amphicarpon				(Pursh) Nash							W1; S3, G4.	Wet pine savannas (SPS-T, SPS-RF), adjacent roadsides.		Occasional. Aug–Oct. Thornhill 23, 821 (NCSC). Specimens seen in the vicinity: Sandy Run: Taggart SARU 538 (NCU!). [= A. purshii Kunth sensu RAB; = FNA, Weakley]
Mono	161	Plantae		Magnoliophyta			Liliopsida			Poales				Poaceae				Andropogon		dealbatus				(C. Mohr ex Hack.) Weakley & LeBlond								Wet pine savannas (SPS-T, VWLPS).		Occasional. Sep–Oct. Thornhill 1113, 1118, 1196 (NCSC). Specimens seen in the vicinity: Sandy Run [Haw’s Run]: Taggart SARU 647 (as A. capillipes var. 2), Taggart SARU 662 (WNC!). [< A. virginicus L. sensu RAB; < A. virginicus L. var. glaucus Hack. sensu FNA; = Weakley]
Mono	162	Plantae		Magnoliophyta			Liliopsida			Poales				Poaceae				Andropogon		gerardii				Vitman								Wet pine savannas (WLPS, VWLPS).		Occasional. Jul–Oct. Thornhill 690, 848, 1040, 1098 (NCSC). Specimens seen in the vicinity: Sandy Run [Hancock]: Taggart SARU 408 (WNC!), Wilbur 8391 (DUKE!). [= RAB, FNA, Weakley]
Mono	163	Plantae		Magnoliophyta			Liliopsida			Poales				Poaceae				Andropogon		glaucopsis				Steud.								Wet pine flatwoods (WPF-T), wet pine savannas (SPS-T, SPS-RF).		Occasional. Sep–Oct. Thornhill 21, 1119, 1160 (NCSC). Specimens seen in the vicinity: Sandy Run [Hancock]: Taggart SARU 489 (WNC!). [< A. virginicus L. sensu RAB; = A. glomeratus var. glaucopsis (Elliott) C. Mohr sensu FNA; = Weakley]
Mono	164	Plantae		Magnoliophyta			Liliopsida			Poales				Poaceae				Andropogon		glomeratus				(Walter) Britton, Sterns, & Poggenb.								Wet pine flatwoods (WPF-T), wet pine savannas (SPS-T, SPS-RF, WLPS, VWLPS).		Frequent. Sep–Oct. Thornhill 1064, 1151, 1157, 1162, 1218, 1219, 1241, 1243, 1244 (NCSC). Specimens seen in the vicinity: Sandy Run [Hancock]: Taggart SARU 541 (WNC!). [< A. virginicus L. sensu RAB; = A. glomeratus (Walter) Britton, Sterns, & Poggenb. var. glomeratus sensu FNA; = Weakley]
Mono	165	Plantae		Magnoliophyta			Liliopsida			Poales				Poaceae				Andropogon		hirsutior				(Hack.) Weakley & LeBlond								Wet pine flatwoods (WPF-T), wet pine savannas (SPS-RF, WLPS, VWLPS).		Occasional. Sep–Oct. Thornhill 1065, 1154, 1165, 1200 (NCSC). [< A. virginicus L. sensu RAB; = A. hirsutior (Walter) Britton, Sterns, & Poggenb. var. hirsutior (Hack.) C. Mohr sensu FNA; = Weakley]
Mono	166	Plantae		Magnoliophyta			Liliopsida			Poales				Poaceae				Andropogon		mohrii				(Hack.) Hack. ex Vasey							State T; S2, G4?.	Pine savannas.		Sep–Oct. Not seen in Shaken Creek Preserve by the present author. Specimens seen in the vicinity: Sandy Run: Taggart SARU 539 (WNC!). [= RAB; = A. liebmannii Hack. var. pungensis (Ashe) C.S. Campb. sensu FNA; = Weakley]
Mono	167	Plantae		Magnoliophyta			Liliopsida			Poales				Poaceae				Andropogon		perangustatus				Nash							W1; S2S3, G4.	Wet pine savannas (WLPS).		Infrequent. Sep–Oct. Thornhill 1051, 1246 (NCSC). [= A. gyrans Ashe var. stenophyllus (Hack.) C.S. Campb. sensu FNA; = Weakley]
Mono	168	Plantae		Magnoliophyta			Liliopsida			Poales				Poaceae				Andropogon		tenuispatheus				(Nash) Nash								Wet pine savannas (WLPS).		Infrequent. Sep–Oct. Thornhill 1193, 1247 (NCSC). Specimens seen in the vicinity: Sandy Run [Neck]: Wilbur 57638 (DUKE!; as A. glomeratus var. pumilus). [< A. virginicus L. sensu RAB; = A. glomeratus (Walter) Britton, Sterns, & Poggenb. var. pumilus (Vasey) Vasey ex L.H. Dewey sensu FNA; = Weakley]
Mono	169	Plantae		Magnoliophyta			Liliopsida			Poales				Poaceae				Andropogon		virginicus		decipiens		C.S. Campb.							W7; S1S2, G5T4.	Wet pine savannas (SPS-T, VWLPS), adjacent roadsides.		Occasional. Sep–Oct. Thornhill 20, 1112, 1194, 1195, 1217 (NCSC). [< A. virginicus L. sensu RAB; = FNA, Weakley]
Mono	170	Plantae		Magnoliophyta			Liliopsida			Poales				Poaceae				Andropogon		virginicus		virginicus		L.								Wet pine savannas (SPS-T, WLPS), adjacent roadsides.		Occasional. Sep–Oct. Thornhill 808, 1216, 1245 (NCSC). Specimens seen in the vicinity: Sandy Run [Hancock]: Taggart SARU 3 (WNC!). [< A. virginicus L. sensu RAB; = FNA, Weakley]
Mono	171	Plantae		Magnoliophyta			Liliopsida			Poales				Poaceae				Anthenantia		rufa				(Elliott) Schult.							W1; S2, G5.	Wet pine flatwoods (WPF-T), wet pine savannas (SPS-T, SPS-RF, WLPS, VWLPS), and adjacent roadsides.		Frequent. Sep–Oct. Thornhill 53, 687, 812, 857, 878, 981 (NCSC). Specimens seen in the vicinity: Sandy Run: Taggart SARU 433 (WNC!). [= Anthaenantia rufa (Elliott) Schult. sensu RAB; = FNA, Weakley]
Mono	172	Plantae		Magnoliophyta			Liliopsida			Poales				Poaceae				Aristida		palustris				(Chapm.) Vasey								Wet pine savannas (WLPS, VWLPS).		Occasional. Aug–Oct. Thornhill 631, 776, 788, 1059 (NCSC). Specimens seen in the vicinity: Sandy Run [Neck]: LeBlond 2586 (NCU!). [= A. affinis (Schult.) Kunth sensu RAB; = FNA, Weakley]
Mono	173	Plantae		Magnoliophyta			Liliopsida			Poales				Poaceae				Aristida		simpliciflora				Chapm.							State E; S1S2, G3G4.	Wet pine savannas (WLPS).		Rare. Aug–Oct. Reported from Shaken Creek Preserve by LeBlond (2000), but no specimens have been seen on site by the present author. Specimens seen in the vicinity: Sandy Run: LeBlond 5277 (NCU!). [= FNA, Weakley]
Mono	174	Plantae		Magnoliophyta			Liliopsida			Poales				Poaceae				Aristida		stricta				Michx.								Pine/scrub oak sandhills (PSOS-MT), mesic pine savannas (MPS-CP), wet pine flatwoods (WPF-T), wet pine savannas (SPS-T, SPS-RF, WLPS, VWLPS).		Abundant. Sep–Nov. Thornhill 653, 820, 1020, 1072 (NCSC). Specimens seen in the vicinity: Highway 50: Wilbur 9429 (DUKE!); Sandy Run [Hancock]: Taggart SARU 1 (WNC!). [< A. stricta Michx. sensu RAB, FNA; = Weakley]
Mono	175	Plantae		Magnoliophyta			Liliopsida			Poales				Poaceae				Aristida		virgata				Trin.								Wet pine flatwoods (WPF-T), wet pine savannas (SPS-T, SPS-RF, WLPS, VWLPS).		Frequent. Aug–Oct. Thornhill 641, 787, 858, 912, 913, 964 (NCSC). Specimens seen in the vicinity: Sandy Run [Hancock]: Taggart SARU 451 (WNC!); Sandy Run [Neck]: Taggart SARU 551 (WNC!; as A. simpliciflora). [= RAB; = A. purpurascens Poir. var. virgata (Trin.) Allred sensu FNA; = Weakley]
Mono	176	Plantae		Magnoliophyta			Liliopsida			Poales				Poaceae				Arundinaria		gigantea				(Walter) Muhl.								Wet pine flatwoods.		Apr–Jul. AI199Not seen in Shaken Creek Preserve (in the relevant habitats) by the present author. Specimens seen in the vicinity: Sandy Run [Patterson]: Taggart SARU 564 (WNC!). [< RAB; = FNA, Weakley]
Mono	177	Plantae		Magnoliophyta			Liliopsida			Poales				Poaceae				Arundinaria		tecta				(Walter) Muhl.								Wet pine flatwoods (WPF-T), wet pine savannas (SPS-T, SPS-RF, WLPS, VWLPS).		Frequent. Apr–Jul. Thornhill 916, 917, 1281 (NCSC). Specimens seen in the vicinity: Sandy Run [O’Berry]: Taggart SARU 161 (WNC!). [< A. gigantea (Walter) Muhl. sensu RAB; = FNA, Weakley]
Mono	178	Plantae		Magnoliophyta			Liliopsida			Poales				Poaceae				Calamagrostis		coarctata				Eaton								Wet pine savannas (VWLPS), adjacent roadsides.		Occasional. Jul–Oct. Thornhill 865, 973, 1033, 1094, 1242 (NCSC). Specimens seen in the vicinity: Sandy Run [Hancock]: Taggart SARU 432 (WNC!; as C. cinnoides); Sandy Run [Neck]: LeBlond 1937 (NCU!; as C. cinnoides). [= C. cinnoides (Muhl.) W.P.C. Barton sensu RAB, FNA; = Weakley]
Mono	179	Plantae		Magnoliophyta			Liliopsida			Poales				Poaceae				Calamovilfa		brevipilis				(Torr.) Hack. ex Scribn. & Southw.							W1; S3, G4.	Wet pine savannas (SPS-RF).		Infrequent. Jun–Oct. Thornhill 640, 648, 963, 1063 (NCSC). Specimens seen in the vicinity: Highway 50: Wilbur 9424 (DUKE!). [= RAB, FNA, Weakley]
Mono	180	Plantae		Magnoliophyta			Liliopsida			Poales				Poaceae				Chasmanthium		laxum				(L.) Yates								Wet pine savannas (SPS-RF, WLPS, VWLPS), adjacent roadsides.		Occasional. Jun–Oct. Thornhill 647, 738, 774, 1198 (NCSC). Specimens seen in the vicinity: Sandy Run [Hancock]: Taggart SARU 273 (WNC!). [= Uniola laxa (L.) Britton, Sterns, & Poggenb. sensu RAB; = FNA, Weakley]
Mono	181	Plantae		Magnoliophyta			Liliopsida			Poales				Poaceae				Coelorachis		rugosa				(Nutt.) Nash							W1; S3, G5.	Wet pine savannas (SPS-T, WLPS, VWLPS), adjacent roadsides.		Occasional. Jun–Oct. Thornhill 813, 877 (NCSC). Specimens seen in the vicinity: Sandy Run: Taggart SARU 490 (WNC!), Wilbur 57655 (DUKE!; as Manisuris rugosa). [= Manisuris rugosa (Nutt.) Kuntze sensu RAB; = FNA, Weakley]
Mono	182	Plantae		Magnoliophyta			Liliopsida			Poales				Poaceae				Coleataenia		anceps	anceps			(Michx.) Soreng								Wet pine savannas (SPS-RF, VWLPS), adjacent roadsides.		Occasional. Jun–Oct. Thornhill 962, 1108, 1474 (NCSC). Specimens seen in the vicinity: Sandy Run [Hancock]: Taggart SARU 435 (WNC!; as Panicum anceps var. anceps). [= Panicum anceps Michx. var. anceps sensu RAB; = Panicum anceps Michx. ssp. anceps sensu FNA; = Weakley]
Mono	183	Plantae		Magnoliophyta			Liliopsida			Poales				Poaceae				Coleataenia		anceps	rhizomata			(Hitchc. & Chase) Soreng								Wet pine savannas (WLPS, VWLPS), adjacent roadsides.		Occasional. Jun–Oct. Thornhill 782, 1054, 1110 (NCSC). [= Panicum anceps Michx. var. rhizomatum (Hitchc. & Chase) Fernald sensu RAB; = Panicum anceps Michx. ssp. rhizomatum (Hitchc. & Chase) Freckmann & Lelong sensu FNA; = Weakley]
Mono	184	Plantae		Magnoliophyta			Liliopsida			Poales				Poaceae				Coleataenia		longifolia	combsii			(Scribn. & C.R. Ball) Soreng								Wet pine savannas (WLPS, VWLPS), adjacent roadsides.		Occasional. Jul–Oct. Thornhill 980, 1107, 1127, 1152 (NCSC). [= Panicum longifolium Torr. var. combsii (Scribn. & C.R. Ball) Fernald sensu RAB; = Panicum rigidulum Bosc ex Nees ssp. combsii (Scribn. & C.R. Ball) Freckmann & Lelong sensu FNA; = Weakley]
Mono	185	Plantae		Magnoliophyta			Liliopsida			Poales				Poaceae				Coleataenia		longifolia	longifolia			(Torr.) Soreng								Wet pine flatwoods (WPF-T), wet pine savannas (SPS-T, SPS-RF, VWLPS), adjacent roadsides.		Frequent. Jul–Oct. Thornhill 13, 26, 936, 1126, 1159, 1221 (NCSC). Specimens seen in the vicinity: Sandy Run [Hancock]: Taggart SARU 540 (WNC!; as Panicum longifolium var. longifolium). [= Panicum longifolium Torr. var. longifolium sensu RAB; = Panicum rigidulum Bosc ex Nees ssp. pubescens (Vasey) Freckmann & Lelong sensu FNA; = Weakley]
Mono	186	Plantae		Magnoliophyta			Liliopsida			Poales				Poaceae				Ctenium		aromaticum				(Walter) Alph. Wood								Wet pine savannas (SPS-T, SPS-RF, WLPS, VWLPS).		Abundant. Jun–Aug(–later in response to fire). Thornhill 318, 449, 539, 649, 877 (NCSC). Specimens seen in the vicinity: Highway 50: Wilbur 9430 (DUKE!); Sandy Run [Hancock]: Ahles 58375 (NCU!), Taggart SARU 242 (WNC!); Sandy Run [Neck]: Levy s.n. (DUKE!), Wilbur 53694 (DUKE!). [= RAB, FNA, Weakley]
Mono	187	Plantae		Magnoliophyta			Liliopsida			Poales				Poaceae				Danthonia		sericea				Nutt.								Mesic pine savannas (MPS-CP).		Infrequent. Apr–Jun. Thornhill 1288 (NCSC). Specimens seen in the vicinity: Old Maple Hill Road: Wilbur 67108 (DUKE!). [= D. sericea Nutt. var. sericea sensu RAB; < FNA; = Weakley]
Mono	188	Plantae		Magnoliophyta			Liliopsida			Poales				Poaceae				Dichanthelium		acuminatum		acuminatum		(Sw.) Gould & C.A. Clark								Pine savannas.		May–Oct. Not seen in Shaken Creek Preserve by the present author. Specimens seen in the vicinity: Sandy Run [Hancock]: Taggart SARU 653 (WNC!). [< Panicum lanuginosum Elliott sensu RAB; = D. acuminatum (Sw.) Gould & C.A. Clark var. acuminatum sensu FNA; = Weakley]
Mono	189	Plantae		Magnoliophyta			Liliopsida			Poales				Poaceae				Dichanthelium		acuminatum		fasciculatum		(Torr.) Freckmann								Wet pine savannas (SPS-T, WLPS, VWLPS).		Infrequent. May–Aug. Thornhill 272 (NCSC). Specimens seen in the vicinity: Sandy Run [Neck]: Wilbur 55307 (DUKE!; as Panicum lanuginosum). [< Panicum lanuginosum Elliott sensu RAB; = D. acuminatum (Sw.) Gould & C.A. Clark ssp. fasciculatum (Torr.) Freckmann & Lelong sensu FNA; = Weakley]
Mono	190	Plantae		Magnoliophyta			Liliopsida			Poales				Poaceae				Dichanthelium		acuminatum		lindheimeri		(Nash) Gould & C.A. Clark								Borrow pits within and roadsides adjacent to wet pine savannas.		May–Sep. Reported from Shaken Creek Preserve by LeBlond (2000), but no specimens have been seen on site by the present author. [< Panicum lanuginosum Elliott sensu RAB; = D. acuminatum (Sw.) Gould & C.A. Clark ssp. lindheimeri (Nash) Freckmann & Lelong sensu FNA; = Weakley]
Mono	191	Plantae		Magnoliophyta			Liliopsida			Poales				Poaceae				Dichanthelium		caerulescens				(Hack. ex Hitchc.) Correll							State E; S1S2, G2G3.	Wet pine savannas (WLPS, VWLPS).		Rare. Jun–Oct. LeBlond 4851 (NCU); Thornhill 1308 (NCSC). [< Panicum dichotomum L. sensu RAB; < D. dichotomum (L.) Gould ssp. roanokense (Ashe) Freckmann & Lelong sensu FNA; = Weakley]
Mono	192	Plantae		Magnoliophyta			Liliopsida			Poales				Poaceae				Dichanthelium		chamaelonche	chamaelonche			(Trin.) Freckmann & Lelong								Wet pine flatwoods (WPF-T).		Infrequent. Apr–Sep. Thornhill 1297 (NCSC). [< Panicum chamaelonche Trin. sensu RAB; < D. chamaelonche (Trin.) Freckmann & Lelong ssp. chamaelonche sensu FNA; = Weakley]
Mono	193	Plantae		Magnoliophyta			Liliopsida			Poales				Poaceae				Dichanthelium		commutatum	commutatum			(Schult.) Gould								Margins of wet pine savannas (VWLPS) and adjacent swamps.		Rare. May–Oct. Thornhill 1494 (NCSC). [< Panicum commutatum Schult. sensu RAB; > D. commutatum (Schult.) Gould ssp. commutatum, D. commutatum (Schult.) Gould ssp. equilaterale (Scribn.) Freckmann & Lelong sensu FNA; = Weakley]
Mono	194	Plantae		Magnoliophyta			Liliopsida			Poales				Poaceae				Dichanthelium		consanguineum				(Kunth) Gould & C.A. Clark								Wet pine savannas (SPS-RF, WLPS, VWLPS).		Occasional. Apr–Sep. Thornhill 246, 285, 296, 1295 (NCSC). [< Panicum consanguineum Kunth sensu RAB; = FNA, Weakley]
Mono	195	Plantae		Magnoliophyta			Liliopsida			Poales				Poaceae				Dichanthelium		dichotomum		nitidum		(Lam.) LeBlond								Wet pine savannas (WLPS).		Infrequent. May–Oct. Thornhill 312 (NCSC). [< Panicum dichotomum L. sensu RAB; = D. dichotomum (L.) Gould ssp. nitidum (Lam.) Freckmann & Lelong sensu FNA; = Weakley]
Mono	196	Plantae		Magnoliophyta			Liliopsida			Poales				Poaceae				Dichanthelium		dichotomum		roanokense		(Ashe) LeBlond							W1; S2, G5T4?.	Wet pine savannas (WLPS, VWLPS).		Occasional. May–Oct. Thornhill 273, 347, 960 (NCSC). Specimens seen in the vicinity: Sandy Run: Sorrie 6381 (NCU!), Taggart SARU 609 (WNC!). [< Panicum dichotomum L. sensu RAB; < D. dichotomum (L.) Gould ssp. roanokense (Ashe) Freckmann & Lelong sensu FNA; = Weakley]
Mono	197	Plantae		Magnoliophyta			Liliopsida			Poales				Poaceae				Dichanthelium		dichotomum				(L.) Gould								Wet pine savannas (VWLPS).		May–Oct. Reported from near Sandy Run by LeBlond (1999), but no specimens have been seen in Shaken Creek Preserve by the present author. [< Panicum dichotomum L. sensu RAB; = D. dichotomum (L.) Gould ssp. dichotomum sensu FNA; = Weakley]
Mono	198	Plantae		Magnoliophyta			Liliopsida			Poales				Poaceae				Dichanthelium		ensifolium				(Baldwin ex Elliott) Gould								Pine/scrub oak sandhills (PSOS-MT), mesic pine savannas (MPS-CP), wet pine flatwoods (WPF-T), wet pine savannas (SPS-T, SPS-RF, WLPS, VWLPS), roadsides.		Frequent. May–Oct. Thornhill 276, 288, 361, 400, 1161, 1294 (NCSC). [< Panicum ensifolium Baldwin ex Elliott sensu RAB; = D. ensifolium (Baldwin ex Elliott) Gould ssp. ensifolium sensu FNA; = Weakley]
Mono	199	Plantae		Magnoliophyta			Liliopsida			Poales				Poaceae				Dichanthelium		leucothrix				(Nash) Freckmann								Wet pine savannas (SPS-T, SPS-RF, WLPS, VWLPS), adjacent roadsides.		Frequent. May–Oct. Thornhill 268, 402, 928, 1293, 1309 (NCSC). [= Panicum leucothrix Nash sensu RAB; = D. acuminatum (Sw.) Gould & C.A. Clark ssp. leucothrix (Nash) Freckmann & Lelong sensu FNA; = Weakley]
Mono	200	Plantae		Magnoliophyta			Liliopsida			Poales				Poaceae				Dichanthelium		longiligulatum				(Nash) Freckmann								Wet pine savannas (SPS-T, WLPS, VWLPS), adjacent ditches.		Occasional. May–Sep. Thornhill 250, 401, 440, 1220, 1306, 1310, 1347 (NCSC). Specimens seen in the vicinity: Sandy Run [Hancock]: Taggart SARU 654 (WNC!). [= Panicum longiligulatum Nash sensu RAB; = D. acuminatum (Sw.) Gould & C.A. Clark ssp. longiligulatum (Nash) Freckmann & Lelong sensu FNA; = Weakley]
Mono	201	Plantae		Magnoliophyta			Liliopsida			Poales				Poaceae				Dichanthelium		mattamuskeetense				(Ashe) Mohlenbr.								Wet pine flatwoods (WPF-T), wet pine savannas (SPS-T, SPS-RF, WLPS).		Occasional. May–Oct. Thornhill 257, 279, 289, 1313, 1506 (NCSC). [< Panicum dichotomum L. sensu RAB; < D. dichotomum (L.) Gould ssp. mattamuskeetense (Nash) Freckmann & Lelong sensu FNA; = Weakley]
Mono	202	Plantae		Magnoliophyta			Liliopsida			Poales				Poaceae				Dichanthelium		ovale		addisonii		(Nash) Gould & C.A. Clark								Dry to damp, sandy woods and fields.		May–Oct. Reported from Sandy Run [Neck] by LeBlond and Weakley (1991), but no specimens have been seen in Shaken Creek Preserve by the present author. [= Panicum commonsianum Ashe sensu RAB; = D. ovale (Elliott) Gould & C.A. Clark ssp. pseudopubescens (Nash) Freckmann & Lelong sensu FNA; = Weakley]
Mono	203	Plantae		Magnoliophyta			Liliopsida			Poales				Poaceae				Dichanthelium		ovale		ovale		(Elliott) Gould & C.A. Clark							W1; S2S3, G5T5.	Wet pine savannas (WLPS).		Rare. May–Oct. Thornhill 1401 (NCSC). Specimens seen in the vicinity: Sandy Run: Taggart SARU 537 (WNC!). [= Panicum ovale Elliott sensu RAB; = D. ovale (Elliott) Gould & C.A. Clark ssp. ovale sensu FNA; = Weakley]
Mono	204	Plantae		Magnoliophyta			Liliopsida			Poales				Poaceae				Dichanthelium		scabriusculum				(Elliott) Gould & C.A. Clark								Wet pine savannas (SPS-RF, WLPS, VWLPS), adjacent roadsides, ditches.		Frequent. May–Oct. Thornhill 407, 618, 688, 691, 1166, 1167, 1168, 1169 (NCSC). Specimens seen in the vicinity: Sandy Run [Haw’s Run]: Taggart SARU 544 (WNC!). [< Panicum scabriusculum Elliott sensu RAB; < D. scabriusculum (Elliott) Gould & C.A. Clark sensu FNA; = Weakley]
Mono	205	Plantae		Magnoliophyta			Liliopsida			Poales				Poaceae				Dichanthelium		scoparium				(Lam.) Gould								Wet pine savannas (WLPS), adjacent roadsides, ditches.		Occasional. May–Oct. Thornhill 571, 643, 791 (NCSC). Specimens seen in the vicinity: Sandy Run [Neck]: Wilbur 53642 (DUKE!). [= Panicum scoparium Lam. sensu RAB; = FNA, Weakley]
Mono	206	Plantae		Magnoliophyta			Liliopsida			Poales				Poaceae				Dichanthelium		species 12 (=chrysopsidifolium)												Pine savannas.		May–Oct. Not seen in Shaken Creek Preserve by the present author. Specimens seen in the vicinity: Sandy Run [Haw’s Run]: Taggart SARU 609 (WNC!; as Dichanthelium aciculare (Desv. ex Poir.) Gould & C.A. Clark). [< Panicum consanguineum Kunth sensu RAB; < D. consanguineum (Kunth) Gould & C.A. Clark sensu FNA; = Weakley]
Mono	207	Plantae		Magnoliophyta			Liliopsida			Poales				Poaceae				Dichanthelium		species 3 (=lancearium)												Wet pine flatwoods (WPF-T).		Occasional. May–Sep. Thornhill 1298, 1315, 1325 (NCSC). Specimens seen in the vicinity: Sandy Run [Neck]: Wilbur 55275 (DUKE!; as Panicum lancearium). [= Panicum lancearium Trin. sensu RAB; < D. portoricense (Desv. ex Ham.) B.F. Hansen & Wunderlin spp. patulum (Scribn. & Merr.) Freckmann & Lelong sensu FNA; = Weakley]
Mono	208	Plantae		Magnoliophyta			Liliopsida			Poales				Poaceae				Dichanthelium		sphaerocarpon				(Elliott) Gould								Wet pine savannas (VWLPS), adjacent roadsides.		Infrequent. May–Oct. Thornhill 773, 1416 (NCSC). Specimens seen in the vicinity: Sandy Run [Haw’s Run]: Taggart SARU 542 (WNC!); Sandy Run [Neck]: LeBlond 2262 (NCU!), Wilbur 55280 (DUKE!; as Panicum sphaerocarpon). [= Panicum sphaerocarpon Elliott sensu RAB; = FNA, Weakley]
Mono	209	Plantae		Magnoliophyta			Liliopsida			Poales				Poaceae				Dichanthelium		strigosum		leucoblepharis		(Trin.) Freckmann								Wet pine savannas (WLPS).		May–Oct. Reported from Shaken Creek Preserve by LeBlond (2000), but no specimens have been seen on site by the present author. [= Panicum ciliatum Elliott sensu RAB; = D. strigosum (Muhl. ex Elliott) Freckmann ssp. leucoblepharis (Trin.) Freckmann & Lelong sensu FNA; = Weakley]
Mono	210	Plantae		Magnoliophyta			Liliopsida			Poales				Poaceae				Dichanthelium		strigosum		strigosum		(Muhl. ex Elliott) Freckmann								Wet pine savannas (WLPS).		Infrequent. May–Oct. Thornhill 1414 (NCSC). [< Panicum strigosum Muhl. ex Elliott sensu RAB; = D. strigosum (Muhl. ex Elliott) Freckmann ssp. strigosum sensu FNA; = Weakley]
Mono	211	Plantae		Magnoliophyta			Liliopsida			Poales				Poaceae				Dichanthelium		tenue				(Muhl.) Freckmann & Lelong								Wet pine flatwoods (WPF-T), wet pine savannas (SPS-RF, WLPS).		Occasional. May–Oct. Thornhill 301, 1307, 1326, 1411, 1415 (NCSC). [= Panicum tenue Muhl. sensu RAB; = FNA, Weakley]
Mono	212	Plantae		Magnoliophyta			Liliopsida			Poales				Poaceae				Dichanthelium		villosissimum		villosissimum		(Nash) Freckmann								Wet pine flatwoods (WPF-T), wet pine savannas (VWLPS).		Infrequent. Apr–Sep. Thornhill 1324 (NCSC). [= Panicum villosissimum Nash sensu RAB; = D. ovale (Elliott) Gould & C.A. Clark subsp. villosissimum (Nash) Freckmann & Lelong sensu FNA; = Weakley]
Mono	213	Plantae		Magnoliophyta			Liliopsida			Poales				Poaceae				Dichanthelium		webberianum				(Nash) LeBlond							W1; S3, GNR.	Wet pine flatwoods (WPF-T), wet pine savannas (SPS-RF)		Occasional. May–Aug. Thornhill 961, 1314, 1316 (NCSC). [= Panicum webberianum Nash sensu RAB; < D. portoricense (Desv. ex Ham.) B.F. Hansen & Wunderlin spp. patulum (Scribn. & Merr.) Freckmann & Lelong sensu FNA; = Weakley]
Mono	214	Plantae		Magnoliophyta			Liliopsida			Poales				Poaceae				Eragrostis		elliottii				S. Watson								Wet pine savannas (VWLPS).		Infrequent. Sep–Oct. Thornhill 1093, 1190 (NCSC). Specimens seen in the vicinity: Sandy Run [Hancock]: Taggart SARU 524 (WNC!). [= RAB, FNA, Weakley]
Mono	215	Plantae		Magnoliophyta			Liliopsida			Poales				Poaceae				Eragrostis		refracta				(Muhl. ex Elliott) Scribn.								Wet pine savannas (SPS-T, SPS-RF, VWLPS), adjacent roadsides.		Frequent. Jul–Oct. Thornhill 22, 815, 816, 862 (NCSC). Specimens seen in the vicinity: Sandy Run [Hancock]: Taggart SARU 416 (WNC!). [= RAB, FNA, Weakley]
Mono	216	Plantae		Magnoliophyta			Liliopsida			Poales				Poaceae				Gymnopogon		brevifolius				Trin.								Wet pine savannas (WLPS, VWLPS).		Infrequent. Aug–Oct. Thornhill 1056, 1071, 1153, 1156 (NCSC). [= RAB, FNA, Weakley]
Mono	217	Plantae		Magnoliophyta			Liliopsida			Poales				Poaceae				Muhlenbergia		capillaris				(Lam.) Trin.								Roadside immediately adjacent and scraped area within wet pine savanna (VWLPS).		Rare. Late Aug–Oct. Thornhill 1114, 1199 (NCSC). [< RAB; = FNA, Weakley]
Mono	218	Plantae		Magnoliophyta			Liliopsida			Poales				Poaceae				Muhlenbergia		expansa				(Poir.) Trin.								Wet pine savannas (WLPS, VWLPS).		Abundant. Late Aug–Oct. Thornhill 771, 864, 1012, 1013, 1014, 1015, 1016 (NCSC). Specimens seen in the vicinity: Sandy Run [Hancock]: Taggart SARU 434 (WNC!); Sandy Run [Neck]: Wilbur 57656, 57666 (DUKE!). [= RAB, FNA, Weakley]
Mono	219	Plantae		Magnoliophyta			Liliopsida			Poales				Poaceae				Muhlenbergia		torreyana				(Schult.) Hitchc.							SC-V; S2, G3.	Wet pine savannas (WLPS).		Rare. Aug–Nov. LeBlond 4859 (NCU!), Sorrie 9501 (NCU!), Thornhill 1053 (NCSC). [= FNA, Weakley]
Mono	220	Plantae		Magnoliophyta			Liliopsida			Poales				Poaceae				Panicum		dichotomiflorum		puritanorum		Svenson							SR-P; S1, G5T4.	Wet pine savannas (SPS-T).		Rare. Jul–Oct. Thornhill 935 (NCSC). [= P. dichotomiflorum Michx. subsp. puritanorum (Svenson) Freckmann & Lelong sensu FNA; = Weakley]
Mono	221	Plantae		Magnoliophyta			Liliopsida			Poales				Poaceae				Panicum		hemitomon				Schult.								Wet pine savannas (VWLPS).		Occasional. Jun–Jul. Not seen in Shaken Creek Preserve by the present author. Specimens seen in the vicinity: Sandy Run [Hancock]: Taggart SARU 241 (WNC!). Though reported by Taggart (2010) as occurring in anthopogenic wetlands and swamps, specimen label data for Taggart’s voucher indicates that the specimen occurred “as a single colony within [a] wet savanna,” where growing with numerous species…
Mono	222	Plantae		Magnoliophyta			Liliopsida			Poales				Poaceae				Panicum		verrucosum				Muhl.								Wet pine savannas (VWLPS).		Occasional. Aug–Oct. Thornhill 1062, 1109, 1124 (NCSC). Specimens seen in the vicinity: Sandy Run [Hancock]: Taggart SARU 611 (WNC!). [= RAB, FNA, Weakley]
Mono	223	Plantae		Magnoliophyta			Liliopsida			Poales				Poaceae				Panicum		virgatum				L.								Wet pine savannas (WLPS, VWLPS), ditches.		Occasional. Jun–Oct. Thornhill 789, 790, 866, 869 (NCSC). Specimens seen in the vicinity: Sandy Run [Hancock]: Taggart SARU 248 (WNC!; as P. virgatum var. virgatum); Sandy Run [Neck]: Wilbur 53711 (DUKE!). [= RAB, FNA; > P. virgatum L. various varieties sensu Weakley]
Mono	224	Plantae		Magnoliophyta			Liliopsida			Poales				Poaceae				Paspalum		floridanum				Michx.								Pine savannas.		Aug–Oct. Not seen in Shaken Creek Preserve by the present author. Specimens seen in the vicinity: Sandy Run [Neck]: Wilbur 53652, 57639 (DUKE!). [= RAB, FNA, Weakley]
Mono	225	Plantae		Magnoliophyta			Liliopsida			Poales				Poaceae				Paspalum		praecox		curtisianum		(Steud.) Vasey							W1; S2S3, G4 (as P. praecox)	Wet pine savannas (WLPS, VWLPS).		Occasional. Jun–Oct. Thornhill 403, 434, 450, 572, 577, 1055, 1088, 1099, 1163 (NCSC). [= RAB; < P. praecox Walter sensu FNA; = Weakley]
Mono	226	Plantae		Magnoliophyta			Liliopsida			Poales				Poaceae				Paspalum		praecox		praecox		Walter							W1; S2S3, G4 (as P. praecox).	Wet pine savannas (VWLPS).		Rare. May–Jul. Thornhill 734 (NCSC). Specimens seen in the vicinity: Sandy Run: Taggart SARU 195 (WNC!). [= RAB; < P. praecox Walter sensu FNA; = Weakley]
Mono	227	Plantae		Magnoliophyta			Liliopsida			Poales				Poaceae				Paspalum		setaceum		ciliatifolium		(Michx.) Vasey								Pine savannas.		Jun–Sep. Not seen in Shaken Creek Preserve by the present author. Specimens seen in the vicinity: Sandy Run [Haw’s Run]: Taggart SARU 545 (WNC!). [< P. setaceum Michx. sensu RAB; = FNA, Weakley]
Mono	228	Plantae		Magnoliophyta			Liliopsida			Poales				Poaceae				Paspalum		setaceum		muhlenbergii		(Nash) D.J. Banks								Wet pine savannas (SPS-RF, VWLPS), adjacent roadsides.		Infrequent. Jun–Sep. Thornhill 646, 1077 (NCSC). [< P. setaceum Michx. sensu RAB; = FNA, Weakley]
Mono	229	Plantae		Magnoliophyta			Liliopsida			Poales				Poaceae				Paspalum		setaceum		setaceum		Michx.								Wet pine flatwoods (WPF-T), wet pine savannas (VWLPS), adjacent roadsides.		Occasional. Jun–Sep. Thornhill 549, 1531 (NCSC). [< P. setaceum Michx. sensu RAB; = FNA, Weakley]
Mono	230	Plantae		Magnoliophyta			Liliopsida			Poales				Poaceae				Saccharum		baldwinii				Spreng.								Wet pine savannas (WLPS, VWLPS).		Infrequent. Jul–Oct. Thornhill 1111, 1189 (NCSC). [= Erianthus strictus Baldwin sensu RAB; = FNA, Weakley]
Mono	231	Plantae		Magnoliophyta			Liliopsida			Poales				Poaceae				Saccharum		brevibarbe		contortum		(Elliott) R.D. Webster								Wet pine flatwoods.		Late Jul–Oct. Not seen in Shaken Creek Preserve by the present author. Specimens seen in the vicinity: Sandy Run [RMK]: Taggart SARU 477 (WNC!). [= Erianthus contortus Elliott sensu RAB; = FNA, Weakley]
Mono	232	Plantae		Magnoliophyta			Liliopsida			Poales				Poaceae				Saccharum		coarctatum				(Fernald) R.D. Webster								Wet pine savannas (WLPS), ditches.		Occasional. Sep–Oct. Thornhill 1019, 1249 (NCSC). [< Erianthus brevibarbis Michx. sensu RAB; = FNA, Weakley]
Mono	233	Plantae		Magnoliophyta			Liliopsida			Poales				Poaceae				Saccharum		giganteum				(Walter) Pers.								Wet pine savannas (WLPS), ditches.		Occasional. Sep–Oct. Thornhill 1023, 1187, 1188, 1215 (NCSC). Specimens seen in the vicinity: Sandy Run [Hancock]: Taggart SARU 4 (WNC!); Sandy Run [Neck]: Wilbur 57647, 57670 (DUKE!; as Erianthus giganteus). [= Erianthus giganteus (Walter) P. Beauv. sensu RAB; = FNA, Weakley]
Mono	234	Plantae		Magnoliophyta			Liliopsida			Poales				Poaceae				Schizachyrium		scoparium		scoparium		(Michx.) Nash								Pine/scrub oak sandhills (PSOS-MT), mesic pine savannas (MPS-CP), wet pine flatwoods (WPF-T), wet pine savannas (SPS-T, SPS-RF, WLPS, VWLPS).		Frequent. (Jun–)Aug–Oct. Thornhill 769, 849, 863, 867, 914, 926, 1248 (NCSC). Specimens seen in the vicinity: Highway 50: Wilbur 9431 (DUKE!); Sandy Run [Hancock]: Taggart SARU 536 (WNC!). [< Andropogon scoparius Michx. sensu RAB; = FNA, Weakley]
Mono	235	Plantae		Magnoliophyta			Liliopsida			Poales				Poaceae				Setaria		parviflora				(Poir.) Kerguélen								Wet pine savannas (VWLPS), adjacent roadsides.		Infrequent. May–Oct. Thornhill 711, 768, 855, 1373 (NCSC). Specimens seen in the vicinity: Sandy Run [Hancock]: Taggart SARU 240 (WNC!). [= S. geniculata P. Beauv. sensu RAB; = FNA, Weakley]
Mono	236	Plantae		Magnoliophyta			Liliopsida			Poales				Poaceae				Sorghastrum		nutans				(L.) Nash								Pine/scrub oak sandhills (PSOS-MT), mesic pine savannas (MPS-CP), wet pine flatwoods (WPF-T).		Infrequent. Sep–Oct. Thornhill 1095, 1158 (NCSC). Specimens seen in the vicinity: Sandy Run [Hancock]: Taggart SARU 465 (WNC!), Wilbur 57654 (DUKE!). [= RAB, FNA, Weakley]
Mono	237	Plantae		Magnoliophyta			Liliopsida			Poales				Poaceae				Sporobolus		pinetorum				Weakley & P.M. Peterson							W1; S3, G3.	Wet pine flatwoods (WPF-T), wet pine savannas (SPS-T, SPS-RF, WLPS, VWLPS).		Abundant. Jun–Sep(–later in response to fire). Thornhill 651, 656, 694, 699, 724, 770, 818, 1018 (NCSC). Specimens seen in the vicinity: Highway 50: Wilbur 9430 (DUKE!; as S. teretifolius); Sandy Run: Sorrie 5889 (NCU!), Taggart SARU 560 (WNC!). [>< S. teretifolius R.M. Harper sensu RAB; = FNA, Weakley]
Mono	238	Plantae		Magnoliophyta			Liliopsida			Liliales				Smilacaceae				Smilax		bona-nox				L.								Wet pine savannas (VWLPS), wet pine flatwoods (WPF-T), adjacent roadsides.		Rare (in pertinent habitats). Late Apr–May; Sep–Nov. Thornhill 1409, 1485 (NCSC). Specimens seen in the vicinity: Sandy Run [Patterson]: Taggart SARU 414 (WNC!). [= RAB, FNA, Weakley]
Mono	239	Plantae		Magnoliophyta			Liliopsida			Liliales				Smilacaceae				Smilax		glauca				Walter								Pine/scrub oak sandhills (PSOS-MT), wet pine savannas (SPS-T, WLPS, VWLPS).		Occasional. Late Apr–early Jun; Sep–Nov. Thornhill 294, 395, 837, 1052, 1235 (NCSC). Specimens seen in the vicinity: Sandy Run [RMK]: Taggart SARU 282 (WNC!). [= RAB, FNA, Weakley]
Mono	240	Plantae		Magnoliophyta			Liliopsida			Liliales				Smilacaceae				Smilax		laurifolia				L.								Wet pine flatwoods (WPF-T), wet pine savannas (SPS-T, SPS-RF, WLPS, VWLPS).		Frequent. Jul–Aug; Sep–Oct. (of 2nd year). Thornhill 168, 181, 262 (NCSC). Specimens seen in the vicinity: Sandy Run [O’Berry]: Taggart SARU 159 (WNC!). [= RAB, FNA, Weakley]
Mono	241	Plantae		Magnoliophyta			Liliopsida			Liliales				Smilacaceae				Smilax		rotundifolia				L.								Wet pine flatwoods (WPF-T).		Infrequent. Apr–May; Sep–Nov. Thornhill 1359 (NCSC). Specimens seen in the vicinity: Sandy Run [Hancock]: Taggart SARU 170 (WNC!). [= RAB, FNA, Weakley]
Mono	242	Plantae		Magnoliophyta			Liliopsida			Liliales				Smilacaceae				Smilax		smallii				Morong								Margins of wet pine savannas (VWLPS) and swamp forests.		Occasional. Jun–Jul; Apr–Jun (of 2nd year). Thornhill 1182, 1492 (NCSC). [= RAB, FNA, Weakley]
Mono	243	Plantae		Magnoliophyta			Liliopsida			Alismatales				Tofieldiaceae				Pleea		tenuifolia				Michx.								Wet pine flatwoods (WPF-T), wet pine savannas (SPS-T, SPS-RF, WLPS, VWLPS).		Frequent (abundant in SPS-RF). Sep–Oct. Thornhill 27 (NCSC). Specimens seen in the vicinity: Sandy Run [Hancock]: Taggart SARU 469 (WNC!); Sandy Run [Neck]: Wilbur 57623A (DUKE!). [= RAB, FNA, Weakley]
Mono	244	Plantae		Magnoliophyta			Liliopsida			Alismatales				Tofieldiaceae				Tofieldia		glabra				Nutt.								Wet pine savannas (SPS-T, SPS-RF, VWLPS).		Infrequent. (Late Aug–)late Sep–Oct; Oct–Nov. Thornhill 1121, 1202, 1208 (NCSC). Specimens seen in the vicinity: Sandy Run [Hancock]: Taggart SARU 507 (WNC!); Sandy Run [Neck]: Wilbur 57649 (DUKE!). [= RAB, FNA, Weakley]
Mono	245	Plantae		Magnoliophyta			Liliopsida			Alismatales				Tofieldiaceae				Triantha		racemosa				(Walter) Small								Wet pine savannas (SPS-T, WLPS, VWLPS).		Occasional. Jun–early Aug; late Sep–Oct. Thornhill 551, 604, 667, 682 (NCSC). Specimens seen in the vicinity: Sandy Run [Hancock]: Taggart SARU 348 (WNC!), Wyland s.n. (NCSC!; as Tofieldia racemosa var. racemosa); Sandy Run [Neck]: Wilbur 53692 (DUKE!; as Tofieldia racemosa). [= Tofieldia racemosa (Walter) Britton, Sterns & Poggenb. var. racemosa RAB; = FNA, Weakley]
Mono	246	Plantae		Magnoliophyta			Liliopsida			Liliales				Trilliaceae				Trillium		pusillum		pusillum		Michx.							State E, FSC; S2, G3T2.	Margins of pine savannas and adjacent swamps.		Late Mar–May; Jun–Jul. Reported from Sandy Run by LeBlond and Weakley (1991), but no specimens have been seen in Shaken Creek Preserve by the present author. [< T. pusillum Michx. sensu RAB; < FNA; = Weakley]
Mono	247	Plantae		Magnoliophyta			Liliopsida			Poales				Xyridaceae				Xyris		ambigua				Beyr. ex Kunth								Wet pine savannas (SPS-T, SPS-RF, WLPS, VWLPS) and borrow pits.		Frequent. Jun–Aug. Thornhill 573, 588, 628, 669, 685, 708, 719, 801 (NCSC). Specimens seen in the vicinity: Sandy Run [Hancock]: Taggart SARU 384 (WNC!). [= RAB, FNA, Weakley]
Mono	248	Plantae		Magnoliophyta			Liliopsida			Poales				Xyridaceae				Xyris		baldwiniana				Schult.								Wet pine savannas (SPS-T).		Rare. Jun–Jul. Thornhill 528 (NCSC). Specimens seen in the vicinity: Sandy Run [RMK]: Taggart SARU 236 (WNC!). [= RAB, FNA, Weakley]
Mono	249	Plantae		Magnoliophyta			Liliopsida			Poales				Xyridaceae				Xyris		brevifolia				Michx.							W1; S3, G4G5.	Wet pine savannas (SPS-T, SPS-RF).		Infrequent. Jun–Aug. Thornhill 37, 800 (NCSC). Specimens seen in the vicinity: Sandy Run: Taggart SARU 350 (WNC!). [= RAB, FNA, Weakley]
Mono	250	Plantae		Magnoliophyta			Liliopsida			Poales				Xyridaceae				Xyris		caroliniana				Walter								Pine/scrub oak sandhills (PSOS-MT), mesic pine savannas (MPS-CP), wet pine flatwoods (WPF-T), wet pine savannas (SPS-T, SPS-RF, WLPS, VWLPS), roadsides.		Frequent. Jun–Jul. Thornhill 578, 587, 677 (NCSC). Specimens seen in the vicinity: Sandy Run [Patterson]: Taggart SARU 303 (WNC!). [= RAB, FNA, Weakley]
Mono	251	Plantae		Magnoliophyta			Liliopsida			Poales				Xyridaceae				Xyris		curtissii				Malme								Wet pine savannas (SPS-RF, WLPS).		Occasional. Jul–Aug. Thornhill 748, 793, 1507 (NCSC). Specimens seen in the vicinity: Sandy Run [Haw’s Run]: Taggart SARU 649 (WNC!). [= RAB; = X. difformis Malme var. curtissii (Malme) Kral sensu FNA; = Weakley]
Mono	252	Plantae		Magnoliophyta			Liliopsida			Poales				Xyridaceae				Xyris		fimbriata				Elliott								Wet pine savannas (SPS-T), borrow pits.		Infrequent. Sep–Oct. Thornhill 31, 919 (NCSC). [= RAB, FNA, Weakley]
Mono	253	Plantae		Magnoliophyta			Liliopsida			Poales				Xyridaceae				Xyris		flabelliformis				Chapm.							W1; S1, G4.	Wet pine savannas (VWLPS).		May–Jun. Reported from Sandy Run by LeBlond (2000), but no specimens have been seen in Shaken Creek Preserve by the present author. [= RAB, FNA, Weakley]
Mono	254	Plantae		Magnoliophyta			Liliopsida			Poales				Xyridaceae				Xyris		floridana				(Kral) E.L. Bridges & Orzell							SR-P; S1, G5T4T5.	Pine savannas, flatwoods, and adjacent ditches.		Aug. Reported from Sandy Run by LeBlond (1999), but no specimens have been seen in Shaken Creek Preserve by the present author. [= X. difformis Chapm. var. floridana Kral sensu FNA; = Weakley]
Mono	255	Plantae		Magnoliophyta			Liliopsida			Poales				Xyridaceae				Xyris		iridifolia				Chapm.							W7; S2, G4G5T4T5.	Borrow pits and local depressions within pine savannas, ditches.		Jul–Sep. Not seen in Shaken Creek Preserve by the present author. Specimens seen in the vicinity: Sandy Run: Taggart SARU 658 (WNC!; as X. difformis Chapm.). [= RAB; = X. laxifolia Mart. var. iridifolia (Chapm.) Kral sensu FNA; = Weakley]
Mono	256	Plantae		Magnoliophyta			Liliopsida			Poales				Xyridaceae				Xyris		jupicai				Rich.								Borrow pits within pine savannas.		Jul–Sep. Reported from Shaken Creek Preserve by LeBlond (2000), but no specimens have been seen by the present author. [= RAB, FNA, Weakley]
Mono	257	Plantae		Magnoliophyta			Liliopsida			Poales				Xyridaceae				Xyris		scabrifolia				R.M. Harper							SC-V, FSC; S2, G3.	Pine savannas.		Jul–Sep. Not seen in Shaken Creek Preserve by the present author. Specimens seen in the vicinity: Sandy Run: McMillan 1788 (NCU!). [< FNA; = Weakley]
Mono	258	Plantae		Magnoliophyta			Liliopsida			Poales				Xyridaceae				Xyris		species 1											W2; S2, G2.	Wet pine savannas (SPS-T).		Rare. Jul–Sep. Thornhill 902 (NCSC). Specimens seen in the vicinity: Sandy Run: Taggart SARU 650 (WNC!). [< X. curtissii Malme sensu RAB; < X. difformis Malme var. curtissii (Malme) Kral sensu FNA; = Weakley]
Dico	259	Plantae		Magnoliophyta			Magnoliopsida			Dipsacales				Adoxaceae				Viburnum		nudum				L.								Ditches within and adjacent to wet pine flatwoods (WPF-T).		Infrequent. Apr–May; Aug–Oct. Thornhill 239, 1330 (NCSC). Specimens seen in the vicinity: Sandy Run [O’Berry]: Taggart SARU 91 (WNC!). [= RAB, Weakley]
Dico	260	Plantae		Magnoliophyta			Magnoliopsida			Saxifragales				Altingiaceae				Liquidambar		styraciflua				L.								Mesic pine savannas (MPS-CP), wet pine flatwoods (WPF-T), wet pine savannas (SPS-T, SPS-RF, WLPS, VWLPS).		Occasional (frequent only in areas not recently burned). Apr–May; Aug–Sep. Thornhill 346, 432 (NCSC). Specimens seen in the vicinity: Old Maple Hill Road: Wilbur 55264 (DUKE!); Sandy Run [O’Berry]: Taggart SARU 164 (WNC!). [= RAB, FNA, Weakley]
Dico	261	Plantae		Magnoliophyta			Magnoliopsida			Sapindales				Anacardiaceae				Rhus		copallinum		copallinum		L.								Pine/scrub oak sandhills (PSOS-MT), mesic pine savannas (MPS-CP), wet pine flatwoods (WPF-T).		Infrequent. Jul–Sep; Aug–Oct. Thornhill 329, 954 (NCSC). Specimens seen in the vicinity: Sandy Run [Neck]: Levy s.n. (DUKE!; as Rhus copallina); Sandy Run [Patterson]: Taggart SARU 412 (WNC!). [< R. copallina L. sensu RAB; = Weakley]
Dico	262	Plantae		Magnoliophyta			Magnoliopsida			Sapindales				Anacardiaceae				Toxicodendron		radicans		radicans		(L.) Kuntze								Swampy margins of wet pine flatwoods (WPF-T) and wet pine savannas (VWLPS).		Infrequent. Late Apr–May; Aug–Oct. Thornhill 136 (NCSC). Specimens seen in the vicinity: Sandy Run [Hancock]: Taggart SARU 199 (WNC!). [< Rhus radicans L. sensu RAB; = Weakley]
Dico	263	Plantae		Magnoliophyta			Magnoliopsida			Apiales				Apiaceae				Centella		erecta				(L. f.) Fernald								Wet pine savannas (WLPS, VWLPS), margins of borrow pits, roadsides.		Frequent. Jun–Aug; Jul–Sep. Thornhill 832, 879 (NCSC). Specimens seen in the vicinity: Sandy Run [Hancock]: Taggart SARU 450 (WNC!). [= C. asiatica (L.) Urb. sensu RAB, Weakley]
Dico	264	Plantae		Magnoliophyta			Magnoliopsida			Apiales				Apiaceae				Eryngium		aquaticum		aquaticum		L.								Wet pine savannas (VWLPS).		Rare. Jul–Sep. Thornhill 842, 1537, 1548 (NCSC). Specimens seen in the vicinity: Sandy Run [Haw’s Run]: Taggart SARU 661 (WNC!). [= RAB, Weakley]
Dico	265	Plantae		Magnoliophyta			Magnoliopsida			Apiales				Apiaceae				Eryngium		aquaticum		ravenelii		(A. Gray) Mathias & Constance							SR-P; S1, G4T2T4Q.	Pine savannas.		Jul–Sep. Not seen in Shaken Creek Preserve by the present author. Specimens seen in the vicinity: Sandy Run: LeBlond 5425 (NCU!), Taggart SARU 411 (WNC!), Wilbur 57680 (DUKE!; as E. aquaticum). [= RAB, Weakley]
Dico	266	Plantae		Magnoliophyta			Magnoliopsida			Apiales				Apiaceae				Eryngium		integrifolium				Walter								Wet pine savannas (WLPS, VWLPS).		Occasional. Aug–Oct. Thornhill 7, 951 (NCSC). Specimens seen in the vicinity: Sandy Run [Hancock]: Taggart SARU 421 (WNC!); Sandy Run[Neck]: Wilbur 57676 (DUKE!). [= RAB, Weakley]
Dico	267	Plantae		Magnoliophyta			Magnoliopsida			Apiales				Apiaceae				Eryngium		yuccifolium		synchaetum		A. Gray ex J.M. Coult. & Rose							W2; S2, G5T5.	Wet pine savannas (WLPS, VWLPS).		Infrequent. Jun–Aug. Thornhill 689, 703 (NCSC). Specimens seen in the vicinity: Sandy Run: Levy s.n. (DUKE!; as E. yuccifolium), Taggart SARU 280 (WNC!), Wilbur 53709 (DUKE!; as E. yuccifolium). [= RAB, Weakley]
Dico	268	Plantae		Magnoliophyta			Magnoliopsida			Apiales				Apiaceae				Eryngium		yuccifolium		yuccifolium		Michx.								Wet pine savannas (WLPS, VWLPS).		Infrequent. Jun–Aug. Thornhill 830 (NCSC). Specimens seen in the vicinity: Sandy Run [Neck]: Taggart SARU 340 (WNC!). [= RAB, Weakley]
Dico	269	Plantae		Magnoliophyta			Magnoliopsida			Apiales				Apiaceae				Oxypolis		rigidior				(L.) Raf.								Wet pine savannas (VWLPS).		Rare. Aug–Oct; Oct–Nov. Thornhill 1043 (NCSC). Specimens seen in the vicinity: Sandy Run [Neck]: Taggart SARU 484 (WNC!). [= RAB, Weakley]
Dico	270	Plantae		Magnoliophyta			Magnoliopsida			Apiales				Apiaceae				Oxypolis		ternata				(Nutt.) A. Heller								Wet pine savannas (VWLPS).		Rare. Sep–Oct; Oct–Nov. Thornhill 1070, 1128 (NCSC). Specimens seen in the vicinity: Sandy Run [Hancock]: Taggart SARU 494 (WNC!; as O. denticulata). [= RAB, Weakley]
Dico	271	Plantae		Magnoliophyta			Magnoliopsida			Apiales				Apiaceae				Ptilimnium		capillaceum				(Michx.) Raf.								Wet pine savannas (VWLPS), adjacent ditches.		Rare. Jun–Aug; Jul–Sep. Thornhill 622 (NCSC). Specimens seen in the vicinity: Sandy Run [Hancock]: Taggart SARU 346 (WNC!). [= RAB, Weakley]
Dico	272	Plantae		Magnoliophyta			Magnoliopsida			Apiales				Apiaceae				Tiedemannia		filiformis		filiformis		(Walter) Feist & S.R. Downie								Wet pine savannas (WLPS, VWLPS), ditches, borrow pits.		Occasional. Jul–Aug; Aug–Sep. Thornhill 742, 833, 983, 1039 (NCSC). Specimens seen in the vicinity: Sandy Run [Neck]: Taggart SARU 347 (WNC!; as Oxypolis filiformis). [= Oxypolis filiformis (Walter) Britton sensu RAB; = Weakley]
Dico	273	Plantae		Magnoliophyta			Magnoliopsida			Gentianales				Apocynaceae				Asclepias		lanceolata				Walter								Wet pine savannas (SPS-RF, WLPS, VWLPS).		Infrequent. Jun–Aug; Aug–Sep. Thornhill 1, 378, 423 (NCSC). Specimens seen in the vicinity: Sandy Run [Hancock]: Taggart SARU 150 (WNC!); Sandy Run [Neck]: Wilbur 55303 (DUKE!). [= RAB, Weakley]
Dico	274	Plantae		Magnoliophyta			Magnoliopsida			Gentianales				Apocynaceae				Asclepias		longifolia				Michx.							W1; S2S3, G4G5.	Wet pine savannas (WLPS, VWLPS).		Infrequent. May–Jun; Jun–Jul. Thornhill 249, 278, 355 (NCSC). Specimens seen in the vicinity: Sandy Run: Taggart SARU 137 (WNC!). [= RAB, Weakley]
Dico	275	Plantae		Magnoliophyta			Magnoliopsida			Gentianales				Apocynaceae				Asclepias		pedicellata				Walter							SC-V; S3, G4.	Wet pine flatwoods (WPF-T).		Rare. Jul–Aug. [= RAB, Weakley]
Dico	276	Plantae		Magnoliophyta			Magnoliopsida			Gentianales				Apocynaceae				Asclepias		rubra				L.								Wet pine flatwoods.		Jun–Jul; Jul–Sep. Not seen in Shaken Creek Preserve by the present author. Specimens seen in the vicinity: Sandy Run [Neck]: Taggart SARU 277 (WNC!), Wilbur 55302, 55326 (DUKE!). [= RAB, Weakley]
Dico	277	Plantae		Magnoliophyta			Magnoliopsida			Aquifoliales				Aquifoliaceae				Ilex		coriacea				(Pursh) Chapm.								Wet pine flatwoods (WPF-T), wet pine savannas (SPS-T, SPS-RF).		Frequent. Apr–May; Sep–Oct. Thornhill 261, 309 (NCSC). Specimens seen in the vicinity: Sandy Run [Neck]: Wilbur 53668, 63782 (DUKE!); Sandy Run [O’Berry]: Taggart SARU 104 (WNC!). [= RAB, Weakley]
Dico	278	Plantae		Magnoliophyta			Magnoliopsida			Aquifoliales				Aquifoliaceae				Ilex		glabra				(L.) A. Gray								Mesic pine savannas (MPS-CP), wet pine flatwoods (WPF-T), wet pine savannas (SPS-T, SPS-RF, WLPS, VWLPS).		Abundant. May–Jun; Sep–Nov. Thornhill 43, 135, 171, 186, 237 (NCSC). Specimens seen in the vicinity: Sandy Run [Neck]: Wilbur 53701 (DUKE!); Sandy Run [Patterson]: Taggart SARU 50 (WNC!). [= RAB, Weakley]
Dico	279	Plantae		Magnoliophyta			Magnoliopsida			Aquifoliales				Aquifoliaceae				Ilex		myrtifolia				Walter								Wet pine savannas (WLPS, VWLPS).		Occasional. May–Jun; Oct–Nov. Thornhill 271, 284, 435, 1185 (NCSC). Specimens seen in the vicinity: Sandy Run [RMK]: Taggart SARU 131 (WNC!). [= I. cassine L. var. myrtifolia (Walter) Sarg. sensu RAB; = Weakley]
Dico	280	Plantae		Magnoliophyta			Magnoliopsida			Aquifoliales				Aquifoliaceae				Ilex		opaca		opaca		Aiton								Wet pine flatwoods (WPF-T), wet pine savannas (SPS-RF).		Rare. Apr–Jun; Sep–Oct. Thornhill 97 (NCSC). Specimens seen in the vicinity: Sandy Run [Hancock]: Taggart SARU 102 (WNC!). [< I. opaca Aiton sensu RAB; = Weakley]
Dico	281	Plantae		Magnoliophyta			Magnoliopsida			Apiales				Araliaceae				Aralia		spinosa				L.								Mesic pine savannas.		Jun–Sep. Not seen in Shaken Creek Preserve by the present author. Specimens seen in the vicinity: Sandy Run [RMK]: Taggart SARU 428 (WNC!). [= RAB, Weakley]
Dico	282	Plantae		Magnoliophyta			Magnoliopsida			Asterales				Asteraceae				Arnica		acaulis				(Walter) Britton, Sterns & Poggenb.								Pine savannas, sandhills, sandy woodlands, and disturbed areas.		Late Mar–early Jun. Reported from Sandy Run [Neck] by LeBlond and Weakley (1991), but no specimens have been seen in Shaken Creek Preserve by the present author. [= RAB, FNA, Weakley]
Dico	283	Plantae		Magnoliophyta			Magnoliopsida			Asterales				Asteraceae				Arnoglossum		ovatum		lanceolatum		(Nutt.) D.B. Ward							SR-P; S2, G4G5.	Wet pine savannas (VWLPS).		Rare. Late Jul–Oct. Thornhill 943 (NCSC). Specimens seen in the vicinity: Sandy Run: Taggart SARU 376 (WNC!). [= Cacalia lanceolata Nutt. sensu RAB; < A. ovatum (Walter) H. Rob. sensu FNA; Weakley]
Dico	284	Plantae		Magnoliophyta			Magnoliopsida			Asterales				Asteraceae				Baccharis		glomeruliflora				Pers.							SC-H; S1, G4.	Ecotone of pine savannas and swamp forests.		Rare. Oct–Nov. Not seen in Shaken Creek Preserve by the present author. Specimens seen in the vicinity: Sandy Run: Taggart SARU 668, SARU 669 (WNC!). [= RAB, FNA, Weakley]
Dico	285	Plantae		Magnoliophyta			Magnoliopsida			Asterales				Asteraceae				Balduina		uniflora				Nutt.								Wet pine flatwoods (WPF-T), wet pine savannas (SPS-RF, WLPS, VWLPS), roadsides.		Occasional. Late Jul–Sep. Thornhill 870 (NCSC). Specimens seen in the vicinity: Sandy Run [Hancock]: Taggart SARU 409 (WNC!); Sandy Run [Neck]: Wilbur 53637 (DUKE!; as Helenium pinnatifidum). [= RAB, FNA, Weakley]
Dico	286	Plantae		Magnoliophyta			Magnoliopsida			Asterales				Asteraceae				Bigelowia		nudata		nudata		(Michx.) DC.								Wet pine flatwoods (WPF-T), wet pine savannas (WLPS, VWLPS).		Occasional. Aug–Oct. Thornhill 750, 967, 1081, 1082 (NCSC). Specimens seen in the vicinity: Sandy Run [Hancock]: Taggart SARU 418 (WNC!); Sandy Run [Neck]: Wilbur 57614, 57667 (DUKE!). [< Chondrophora nudata (Michx.) Britton sensu RAB; = FNA, Weakley]
Dico	287	Plantae		Magnoliophyta			Magnoliopsida			Asterales				Asteraceae				Carphephorus		bellidifolius				(Michx.) Torr. & A. Gray								Mesic pine savannas (MPS-CP).		Rare. Aug–Oct. Thornhill 1542 (NCSC). Specimens seen in the vicinity: Sandy Run [Neck]: Taggart SARU 491 (WNC!). [= RAB, FNA, Weakley]
Dico	288	Plantae		Magnoliophyta			Magnoliopsida			Asterales				Asteraceae				Carphephorus		tomentosus				(Michx.) Torr. & A. Gray								Mesic pine savannas (MPS-CP), wet pine flatwoods (WPF-T), wet pine savannas (SPS-T).		Occasional. Aug–Oct. Thornhill 1000, 1120, 1519 (NCSC). Specimens seen in the vicinity: Sandy Run [Hancock]: Taggart SARU 461 (WNC!); Sandy Run [Neck]: Wilbur 57620 (DUKE!). [= RAB, FNA, Weakley]
Dico	289	Plantae		Magnoliophyta			Magnoliopsida			Asterales				Asteraceae				Chaptalia		tomentosa				Vent.								Pine savannas (WLPS, VWLPS).		Infrequent. Feb–May. Thornhill 87, 94 (NCSC). Specimens seen in the vicinity: Sandy Run [Hancock]: Taggart SARU 9 (WNC!). [= RAB, FNA, Weakley]
Dico	290	Plantae		Magnoliophyta			Magnoliopsida			Asterales				Asteraceae				Chrysopsis		mariana				(L.) Elliott								Pine savannas.		Late Jun–Oct. Not seen in Shaken Creek Preserve by the present author. Specimens seen in the vicinity: Sandy Run [Hancock]: Taggart SARU 495 (WNC!). [= Heterotheca mariana (L.) Shinners sensu RAB; = FNA, Weakley]
Dico	291	Plantae		Magnoliophyta			Magnoliopsida			Asterales				Asteraceae				Cirsium		horridulum		horridulum		Michx.								Wet pine savannas (VWLPS), adjacent roadsides.		Rare. Late Mar–early Jun. Thornhill 245 (NCSC). Specimens seen in the vicinity: Sandy Run [Hancock]: Taggart SARU 24 (WNC!). [= Carduus spinosissimus Walter sensu RAB; = FNA, Weakley]
Dico	292	Plantae		Magnoliophyta			Magnoliopsida			Asterales				Asteraceae				Cirsium		horridulum		vittatum		(Small) R.W. Long								Wet pine savannas (VWLPS), adjacent roadsides.		Infrequent. May–Jul. Thornhill 377 (NCSC). Specimens seen in the vicinity: Highway 50: LeBlond 4252 (NCU!); Sandy Run [Hancock]: Taggart SARU 592 (WNC!). [= Carduus smallii (Britton) H.E. Ahles sensu RAB; = FNA, Weakley]
Dico	293	Plantae		Magnoliophyta			Magnoliopsida			Asterales				Asteraceae				Cirsium		lecontei				Torr. & A. Gray							SC-V; S2, G2G3.	Wet pine savannas (SPS-T).		Rare. Jun–Aug. Thornhill 1454 (NCSC). Specimens seen in the vicinity: Sandy Run: Taggart SARU 250 (WNC!). [= Carduus lecontei (Torr. & A. Gray) Pollard sensu RAB; = FNA, Weakley]
Dico	294	Plantae		Magnoliophyta			Magnoliopsida			Asterales				Asteraceae				Cirsium		repandum				Michx.								Pine savannas.		Feb–May. Not seen in Shaken Creek Preserve by the present author. Specimens seen in the vicinity: Sandy Run [Hancock]: Taggart SARU 342 (WNC!). [= Carduus repandus (Michx.) Pers. sensu RAB; = FNA, Weakley]
Dico	295	Plantae		Magnoliophyta			Magnoliopsida			Asterales				Asteraceae				Cirsium		virginianum				(L.) Michx.								Wet pine savannas (WLPS, VWLPS).		Occasional. Aug–Oct. Thornhill 923, 945 (NCSC). Specimens seen in the vicinity: Sandy Run [Hancock]: Taggart SARU 455 (WNC!), Wilbur 57657 (DUKE!). [= Carduus virginianus L. sensu RAB; = FNA, Weakley]
Dico	296	Plantae		Magnoliophyta			Magnoliopsida			Asterales				Asteraceae				Coreopsis		falcata				F.E. Boynton								Wet pine flatwoods (WPF-T), wet pine savannas (SPS-T, SPS-RF, WLPS, VWLPS), borrow pits, adjacent roadsides.		Occasional. Early May–early Jul(–later). Thornhill 219, 352, 367, 368, 392 (NCSC). Specimens seen in the vicinity: Sandy Run [Haw’s Run]: Taggart SARU 145 (WNC!); Sandy Run [Neck]: Wilbur 55321 (DUKE!). [= RAB; < C. gladiata Walter sensu FNA; = Weakley]
Dico	297	Plantae		Magnoliophyta			Magnoliopsida			Asterales				Asteraceae				Coreopsis		linifolia				Nutt.								Wet pine flatwoods (WPF-T), wet pine savannas (SPS-T, SPS-RF, WLPS, VWLPS), borrow pits, adjacent roadsides.		Frequent. Early Jul–late Oct. Thornhill 6, 38, 841, 875, 976, 978, 979, 1044 (NCSC). Specimens seen in the vicinity: Sandy Run [Hancock]: Taggart SARU 456 (WNC!); Sandy Run [Neck]: Wilbur 57677 (DUKE!; as C. gladiata). [= C. angustifolia Aiton sensu RAB; < C. gladiata Walter sensu FNA; = Weakley]
Dico	298	Plantae		Magnoliophyta			Magnoliopsida			Asterales				Asteraceae				Coreopsis		palustris				Sorrie							SR-P; S1S2, G3G4Q.	Pine savannas.		Sep–Oct. Not seen in Shaken Creek Preserve by the present author. Specimens seen in the vicinity: Sandy Run: Taggart SARU 422 (WNC!; as C. helianthoides). [= C. helianthoides Beadle sensu RAB; < C. gladiata Walter sensu FNA; = Weakley]
Dico	299	Plantae		Magnoliophyta			Magnoliopsida			Asterales				Asteraceae				Coreopsis		species 1											SR-L; S1, G1?.	Wet pine savannas (VWLPS), adjacent roadsides.		Rare. Sep–Oct. Thornhill 1171 (NCSC). Specimens seen in the vicinity: Sandy Run: LeBlond 4600, 4654, 5424 (NCU!), Taggart SARU 504 (WNC!). [= Weakley]
Dico	300	Plantae		Magnoliophyta			Magnoliopsida			Asterales				Asteraceae				Elephantopus		nudatus				A. Gray								Mesic pine savannas (MPS-CP), wet pine flatwoods (WPF-T), adjacent roadsdies.		Occasional. Late Jul–Sep. Thornhill 1045, 1086 (NCSC). Specimens seen in the vicinity: Sandy Run [O’Berry]: Taggart SARU 398 (WNC!). [= RAB, FNA, Weakley]
Dico	301	Plantae		Magnoliophyta			Magnoliopsida			Asterales				Asteraceae				Erechtites		hieraciifolius				(L.) Raf. ex DC.								Disturbed areas in pine savannas, dry edges of borrow pits, roadsides.		Rare. Late Jul–Nov. Thornhill 938, 1370 (NCSC). Specimens seen in the vicinity: Sandy Run [Hancock]: Taggart SARU 407 (WNC!). [< RAB; = E. hieraciifolius (L.) Raf. ex DC. var. hieraciifolius sensu FNA; = Weakley]
Dico	302	Plantae		Magnoliophyta			Magnoliopsida			Asterales				Asteraceae				Erigeron		vernus				(L.) Torr. & A. Gray								Wet pine savannas (SPS-T, SPS-RF, WLPS, VWLPS), adjacent roadsides.		Frequent. Late Mar–Jun. Thornhill 112, 177, 213, 217, 766 (NCSC). Specimens seen in the vicinity: Sandy Run [Neck]: Taggart 185 (NCU!), Wilbur 55318, 67091 (DUKE!). [= RAB, FNA, Weakley]
Dico	303	Plantae		Magnoliophyta			Magnoliopsida			Asterales				Asteraceae				Eupatorium		capillifolium				(Lam.) Small								Disturbed (sometimes only slightly so) areas in wet pine flatwoods (WPF-T) and wet pine savannas (SPS-RF, VWLPS), adjacent roadsides.		Rare (frequent in more disturbed areas). Sep–Nov. Thornhill 952, 1143 (NCSC). Specimens seen in the vicinity: Sandy Run [Neck]: Taggart 503 (NCU!). [= E. capillifolium (Lam.) Small var. capillifolium sensu RAB; = FNA, Weakley]
Dico	304	Plantae		Magnoliophyta			Magnoliopsida			Asterales				Asteraceae				Eupatorium		hyssopifolium				L.								Pine savannas.		Late Jul–Oct. Not seen in Shaken Creek Preserve by the present author. Specimens seen in the vicinity: Sandy Run [Haw’s Run]: Taggart SARU 639 (WNC!); Sandy Run [Neck]: Wilbur 57618 (DUKE!). [< RAB; = E. hyssopifolium L. var. hyssopifolium sensu FNA; = Weakley]
Dico	305	Plantae		Magnoliophyta			Magnoliopsida			Asterales				Asteraceae				Eupatorium		leucolepis				(DC.) Torr. & A. Gray								Wet pine savannas (WLPS, VWLPS).		Frequent. Aug–Oct. Thornhill 828, 925, 982, 1213 (NCSC). Sandy Run [Hancock]: Taggart SARU 357 (WNC!). [< RAB; < E. leucolepis (DC.) Torr. & A. Gray var. leucolepis sensu FNA; = Weakley]
Dico	306	Plantae		Magnoliophyta			Magnoliopsida			Asterales				Asteraceae				Eupatorium		mohrii				Greene								Pine savannas.		Aug–Oct. Not seen in Shaken Creek Preserve by the present author. Specimens seen in the vicinity: Sandy Run [Hancock]: Taggart SARU 403 (WNC!). [< E. recurvans Small sensu RAB; < FNA; = Weakley]
Dico	307	Plantae		Magnoliophyta			Magnoliopsida			Asterales				Asteraceae				Eupatorium		perfoliatum				L.								Pine savannas.		Aug–Oct. Not seen in Shaken Creek Preserve by the present author. Specimens seen in the vicinity: Sandy Run [Hancock]: Taggart SARU 466 (WNC!); Sandy Run [Neck]: Wilbur 57642, 57657 (DUKE!). [= RAB, FNA, Weakley]
Dico	308	Plantae		Magnoliophyta			Magnoliopsida			Asterales				Asteraceae				Eupatorium		pilosum				Walter								Wet pine flatwoods (WPF-T), wet pine savannas (SPS-T, SPS-RF).		Occasional. Aug–Oct. Thornhill 947, 1520 (NCSC). Specimens seen in the vicinity: Sandy Run [Hancock]: Taggart SARU 356 (WNC!); Sandy Run [Neck]: Wilbur 53712 (DUKE!). [= RAB, FNA, Weakley]
Dico	309	Plantae		Magnoliophyta			Magnoliopsida			Asterales				Asteraceae				Eupatorium		recurvans				Small							W7; S1?, G3G4Q.	Wet pine savannas (SPS-RF, WLPS).		Infrequent. Aug–Oct. Thornhill 1122, 1146, 1206, 1237 (NCSC). [< RAB; < E. mohrii Greene sensu FNA; = Weakley]
Dico	310	Plantae		Magnoliophyta			Magnoliopsida			Asterales				Asteraceae				Eupatorium		rotundifolium				L.								Wet pine savannas (WLPS), adjacent roadsides.		Rare. Aug–Oct. Thornhill 759 (NCSC). Specimens seen in the vicinity: Sandy Run [Hancock]: Taggart SARU 349 (WNC!). [= E. rotundifolium L. var. rotundifolium sensu RAB, FNA; = Weakley]
Dico	311	Plantae		Magnoliophyta			Magnoliopsida			Asterales				Asteraceae				Eurybia		compacta				G.L. Nesom								Wet pine savannas (WLPS, VWLPS).		Infrequent. Late Jul–Oct. Thornhill 50, 969, 1522 (NCSC). Specimens seen in the vicinity: Sandy Run [Hancock]: Taggart SARU 448 (WNC!). [= Aster gracilis Nutt. sensu RAB; = FNA, Weakley]
Dico	312	Plantae		Magnoliophyta			Magnoliopsida			Asterales				Asteraceae				Eurybia		paludosa				(Aiton) G.L. Nesom								Wet pine savannas (SPS-T, WLPS, VWLPS).		Frequent. Jul–Oct. Thornhill 102, 924, 969, 1041, 1209, 1522 (NCSC). Specimens seen in the vicinity: Sandy Run [Hancock]: Taggart SARU 347 (WNC!); Sandy Run [Neck]: Wilbur 57664 (DUKE!; as Aster paludosus). [= Aster paludosus Aiton sensu RAB; = FNA, Weakley]
Dico	313	Plantae		Magnoliophyta			Magnoliopsida			Asterales				Asteraceae				Euthamia		caroliniana				(L.) Greene ex Porter & Britton								Wet pine flatwoods (WPF-T), wet pine savannas (SPS-RF, WLPS, VWLPS).		Occasional. Sep–Dec. Thornhill 1123, 1129, 1144 (NCSC). Specimens seen in the vicinity: Sandy Run [Hancock]: Taggart SARU 480 (WNC!); Sandy Run [Neck]: Wilbur 57634 (DUKE!; as Euthamia minor). [> Solidago microcephala (Nutt.) Bush, >< Solidago tenuifolia Pursh sensu RAB; = FNA, Weakley]
Dico	314	Plantae		Magnoliophyta			Magnoliopsida			Asterales				Asteraceae				Helenium		autumnale				L.								Wet pine savannas (WLPS, VWLPS), adjacent roadsides.		Infrequent. Sep–Oct. Thornhill 1029, 1087, 1550 (NCSC). Specimens seen in the vicinity: Sandy Run [Hancock]: Taggart SARU 460 (WNC!); Sandy Run [Neck]: Wilbur 57631 (as Helenium pinnatifidum), 57674 (DUKE!). [= RAB, FNA, Weakley]
Dico	315	Plantae		Magnoliophyta			Magnoliopsida			Asterales				Asteraceae				Helenium		pinnatifidum				(Schwein. ex Nutt.) Rydb.							SR-P; S2, G4.	Pine savannas and adjacent ditches.		Apr–May. Reported from Sandy Run by LeBlond and Weakley (1991), but no specimens have been seen in Shaken Creek Preserve by the present author. [= RAB, FNA, Weakley]
Dico	316	Plantae		Magnoliophyta			Magnoliopsida			Asterales				Asteraceae				Helianthus		angustifolius				L.								Wet pine savannas (WLPS, VWLPS).		Occasional. (Jul–)Sep–Oct(–frost). Thornhill 51, 1140, 1141 (NCSC). Specimens seen in the vicinity: Sandy Run [Hancock]: Taggart SARU 405 (WNC!); Sandy Run [Neck]: Wilbur 57668 (DUKE!). [= RAB, FNA, Weakley]
Dico	317	Plantae		Magnoliophyta			Magnoliopsida			Asterales				Asteraceae				Helianthus		heterophyllus				Nutt.								Depressions in wet pine flatwoods (WPF-T), wet pine savannas (WLPS, VWLPS).		Infrequent. Aug–Oct. Thornhill 989, 1090 (NCSC). Specimens seen in the vicinity: Sandy Run [Hancock]: Taggart SARU 459 (WNC!). [= RAB, FNA, Weakley]
Dico	318	Plantae		Magnoliophyta			Magnoliopsida			Asterales				Asteraceae				Hieracium		gronovii				L.								Mesic pine savannas (MPS-CP).		Rare. Jul–Nov. Thornhill 1549 (NCSC). Specimens seen in the vicinity: Sandy Run [O’Berry]: Taggart SARU 397 (WNC!). [= RAB, FNA, Weakley]
Dico	319	Plantae		Magnoliophyta			Magnoliopsida			Asterales				Asteraceae				Ionactis		linariifolia				(L.) Greene								Mesic pine savannas (MPS-CP), wet pine flatwoods (WPF-T).		Infrequent. Aug–Nov. Thornhill 1186 (NCSC). Specimens seen in the vicinity: Sandy Run [Hancock]: Taggart SARU 492 (WNC!). [= Aster linariifolius L. sensu RAB; = FNA, Weakley]
Dico	320	Plantae		Magnoliophyta			Magnoliopsida			Asterales				Asteraceae				Liatris		pilosa				(Aiton) Willd.								Mesic pine savannas (MPS-CP), wet pine flatwoods (WPF-T).		Infrequent. (Aug–)Sep–Oct(–Nov). Thornhill 52, 1176, 1545 (NCSC). [< L. graminifolia Willd. sensu RAB; = FNA, Weakley]
Dico	321	Plantae		Magnoliophyta			Magnoliopsida			Asterales				Asteraceae				Liatris		spicata		resinosa		(Nutt.) Gaiser								Wet pine savannas (SPS-RF, WLPS, VWLPS).		Occasional. (Jul–)Aug–Oct(–Nov). Thornhill 829, 874, 956 (NCSC). Specimens seen in the vicinity: Sandy Run [Hancock]: Taggart SARU 410 (WNC!). [= RAB, FNA, Weakley]
Dico	322	Plantae		Magnoliophyta			Magnoliopsida			Asterales				Asteraceae				Marshallia		graminifolia				(Walter) Small								Wet pine savannas (SPS-T, SPS-RF, WLPS, VWLPS).		Occasional. Late Jul–mid Oct. Thornhill 5, 701, 741, 807 (NCSC). Specimens seen in the vicinity: Sandy Run [Patterson]: Taggart SARU 362 (WNC!). [= RAB; < M. graminifolia (Walter) Small sensu FNA; = Weakley]
Dico	323	Plantae		Magnoliophyta			Magnoliopsida			Asterales				Asteraceae				Mikania		scandens				(L.) Willd.								Wet pine savannas (VWLPS), adjacent swamps.		Infrequent. Jul–Oct. Thornhill 824, 834 (NCSC). Specimens seen in the vicinity: Sandy Run [Haw’s Run]: Taggart SARU 312 (WNC!). [= RAB, FNA, Weakley]
Dico	324	Plantae		Magnoliophyta			Magnoliopsida			Asterales				Asteraceae				Packera		paupercula				(Michx.) Á. Löve & D. Löve							SR-T; S1, G2G3 (as P. crawfordii (Britton) A.M. Mahoney & R.R. Kowal).	Pine savannas.		Apr–May. Not seen in Shaken Creek Preserve by the present author. Specimens seen in the vicinity: Sandy Run: LeBlond 6409 (NCU!; as P. crawfordii), Taggart SARU 10 (WNC!; as P. crawfordii/P. paupercula), and Weakley 7216 (NCU!; as P. crawfordii). Whether the entity treated as Packera crawfordii deserves recognition as distinct (either varietally or specifically) from P. paupercula s.l. is still u…
Dico	325	Plantae		Magnoliophyta			Magnoliopsida			Asterales				Asteraceae				Pityopsis		graminifolia		latifolia		(Fernald) Semple & F.D. Bowers								Mesic pine savannas (MPS-CP), wet pine flatwoods (WPF-T), wet pine savannas (SPS-RF, WLPS).		Occasional. Jun–Oct. Thornhill 761, 922, 985, 1145 (NCSC). Specimens seen in the vicinity: Sandy Run [Patterson]: Taggart SARU 363 (WNC!). [> Heterotheca nervosa (Willd.) Shinners var. nervosa (Small) Shinners ex Ahles, Heterotheca correllii (Fernald) H.E. Ahles sensu RAB; = FNA, Weakley]
Dico	326	Plantae		Magnoliophyta			Magnoliopsida			Asterales				Asteraceae				Pluchea		baccharis				(Mill.) Pruski								Wet pine savannas (VWLPS).		Jun–Jul. Reported from Sandy Run [O’Berry Tract] by LeBlond (2000), but no specimens have been seen in Shaken Creek Preserve by the present author. [= P. rosea R.K. Godfrey sensu RAB; = FNA, Weakley]
Dico	327	Plantae		Magnoliophyta			Magnoliopsida			Asterales				Asteraceae				Pluchea		foetida				(L.) DC.								Wet pine savannas (VWLPS), borrow pits.		Infrequent. Aug–Oct. Thornhill 672, 686, 955 (NCSC). Specimens seen in the vicinity: Sandy Run [Hancock]: Taggart SARU 354 (WNC!), Wilbur 53659 (DUKE!). [= RAB, FNA, Weakley]
Dico	328	Plantae		Magnoliophyta			Magnoliopsida			Asterales				Asteraceae				Prenanthes		autumnalis				Walter								Wet pine savannas (WLPS, VWLPS).		Rare. Sep–Nov. Thornhill 1174, 1232 (NCSC). Specimens seen in the vicinity: Sandy Run [Hancock]: Taggart SARU 549 (WNC!). [= RAB, FNA, Weakley]
Dico	329	Plantae		Magnoliophyta			Magnoliopsida			Asterales				Asteraceae				Pseudognaphalium		obtusifolium				(L.) Hilliard & Burtt								Mesic pine savannas (MPS-CP), adjacent roadsides and disturbed areas.		Infrequent. Aug–Oct. Thornhill 1530 (NCSC). Specimens seen in the vicinity: Sandy Run [RMK]: Taggart SARU 566 (WNC!). [= Gnaphalium obtusifolium L. sensu RAB; = FNA, Weakley]
Dico	330	Plantae		Magnoliophyta			Magnoliopsida			Asterales				Asteraceae				Pterocaulon		pycnostachyum				(Michx.) Elliott								Pine/scrub oak sandhills (PSOS-MT), mesic pine savannas (MPS-CP).		Occasional. May–Jun. Thornhill 387, 1296 (NCSC). Specimens seen in the vicinity: Sandy Run [Neck]: Levy s.n. (DUKE!), Taggart SARU 278 (WNC!), Wilbur 53637, 55274 (DUKE!). [= RAB, FNA, Weakley]
Dico	331	Plantae		Magnoliophyta			Magnoliopsida			Asterales				Asteraceae				Pyrrhopappus		carolinianus				(Walter) DC.								Roadside margins of wet pine savannas (VWLPS) and roadsides.		Occasional. Mar–Jun. Thornhill 481, 657 (NCSC). Specimens seen in the vicinity: Sandy Run [Hancock]: Taggart SARU 63 (WNC!). [> P. carolinianus (Walter) DC. var. carolinianus sensu RAB; = FNA, Weakley]
Dico	332	Plantae		Magnoliophyta			Magnoliopsida			Asterales				Asteraceae				Sericocarpus		linifolius				(L.) Britton, Sterns & Poggenb.								Mesic pine savannas (MPS-CP), wet pine savannas (SPS-RF).		Rare. Jun–Jul. Thornhill 1003 (NCSC). Specimens seen in the vicinity: Sandy Run [Hancock]: Taggart SARU 264 (WNC!; as S. tortifolius). [= Aster solidagineus Michx. sensu RAB; = FNA, Weakley]
Dico	333	Plantae		Magnoliophyta			Magnoliopsida			Asterales				Asteraceae				Silphium		compositum		compositum		Michx.								Pine savannas.		May–Sep. Not seen in Shaken Creek Preserve by the present author. Specimens seen in the vicinity: Sandy Run [Hancock]: Taggart SARU 470 (WNC!). [< S. compositum Michx. var. compositum sensu RAB; < S. compositum Michx. sensu FNA; = Weakley]
Dico	334	Plantae		Magnoliophyta			Magnoliopsida			Asterales				Asteraceae				Solidago		fistulosa				Mill.								Wet pine savannas (VWLPS).		Aug–Nov. Reported from Sandy Run [O’Berry Tract] by LeBlond (2000), but no specimens have been seen in Shaken Creek Preserve by the present author. [= RAB, FNA, Weakley]
Dico	335	Plantae		Magnoliophyta			Magnoliopsida			Asterales				Asteraceae				Solidago		gracillima				Torr. & A. Gray							W1; S3, G4?.	Wet pine savannas (WLPS, VWLPS).		Occasional. Aug–Oct. Thornhill 942, 1078, 1130, 1236 (NCSC). [= RAB; = S. stricta Aiton ssp. gracillima (Torr. & A. Gray) Semple sensu FNA; = Weakley]
Dico	336	Plantae		Magnoliophyta			Magnoliopsida			Asterales				Asteraceae				Solidago		odora				Aiton								Pine savannas.		Jul–Oct. Not seen in Shaken Creek Preserve by the present author. Specimens seen in the vicinity: Sandy Run [RMK]: Taggart SARU 476 (WNC!). [= RAB; = S. odora Aiton ssp. odora sensu FNA; = Weakley]
Dico	337	Plantae		Magnoliophyta			Magnoliopsida			Asterales				Asteraceae				Solidago		pinetorum				Small								Pine savannas.		Jul–Sep. Not seen in Shaken Creek Preserve by the present author. Specimens seen in the vicinity: Sandy Run [Hancock]: Taggart SARU 496 (WNC!). [= RAB, FNA, Weakley]
Dico	338	Plantae		Magnoliophyta			Magnoliopsida			Asterales				Asteraceae				Solidago		puberula		pulverulenta		(Nutt.) Chapm.								Wet pine flatwoods (WPF-T), wet pine savannas (WLPS).		Infrequent. Sep–Oct. Thornhill 1038 (NCSC). Specimens seen in the vicinity: Sandy Run [Hancock]: Taggart SARU 354 (WNC!). [= RAB; = S. puberula Nutt. var. pulverulenta (Nutt.) Chapm. sensu FNA; = Weakley]
Dico	339	Plantae		Magnoliophyta			Magnoliopsida			Asterales				Asteraceae				Solidago		pulchra				Small							W1; S3, G3.	Wet pine savannas (SPS-T, SPS-RF, WLPS, VWLPS).		Frequent. Jul–Sep. Thornhill 39, 40, 909, 1036, 1495 (NCSC). Specimens seen in the vicinity: Sandy Run: Taggart SARU 401 (WNC!), Wilbur 57672 (DUKE!). [< S. stricta Aiton sensu RAB; = FNA, Weakley]
Dico	340	Plantae		Magnoliophyta			Magnoliopsida			Asterales				Asteraceae				Solidago		stricta				Aiton								Wet pine savannas (SPS-RF, WLPS).		Infrequent. Late Aug–Oct. Thornhill 1136 (NCSC). Specimens seen in the vicinity: Sandy Run [O’Berry]: Taggart SARU 512 (WNC!). [< RAB; = S. stricta Aiton spp. stricta sensu FNA; = Weakley]
Dico	341	Plantae		Magnoliophyta			Magnoliopsida			Asterales				Asteraceae				Symphyotrichum		dumosum				(L.) G.L. Nesom								Wet pine savannas (SPS-RF, WLPS, VWLPS).		Occasional. Late Aug–Oct. Thornhill 46, 1131, 1170, 1184, 1210, 1211, 1212 (NCSC). Specimens seen in the vicinity: Sandy Run [Hancock]: Taggart SARU 391 (WNC!); Sandy Run [Neck]: Wilbur 57673 (DUKE!; as Aster dumosus). [= Aster dumosus L. sensu RAB; = FNA; > S. dumosum (L.) G.L. Nesom various varieties sensu Weakley]
Dico	342	Plantae		Magnoliophyta			Magnoliopsida			Asterales				Asteraceae				Symphyotrichum		lateriflorum				(L.) Á. Löve & D. Löve								In a wide variety of dry to moist habitats.		Sep–Nov. Not seen in Shaken Creek Preserve by the present author. Specimens seen in the vicinity: Sandy Run [Neck]: LeBlond 2590 (NCU!; as S. lateriflorum var. lateriflorum). [< Aster lateriflorus (L.) Britton sensu RAB; = FNA; < S. lateriflorum (L.) Á. Löve & D. Löve various varieties sensu Weakley]
Dico	343	Plantae		Magnoliophyta			Magnoliopsida			Asterales				Asteraceae				Symphyotrichum		novi-belgii		elodes		(Torr. & A. Gray) G.L. Nesom								Pine savannas and marshes.		Late Sep–Nov. Reported from Sandy Run [Haw’s Run] by LeBlond (1999), but no specimens have been seen in Shaken Creek Preserve by the present author. [< Aster novi-belgii L. sensu RAB; = FNA, Weakley]
Dico	344	Plantae		Magnoliophyta			Magnoliopsida			Asterales				Asteraceae				Symphyotrichum		pilosum		pilosum		(Willd.) G.L. Nesom								Woodland borders, old fields, disturbed areas.		Sep–Nov. Not seen in Shaken Creek Preserve by the present author. Specimens seen in the vicinity: Sandy Run [Neck]: Wilbur 57641, 57643 (DUKE!; as Aster pilosus Willd.). [< Aster pilosus Willd. sensu RAB; = FNA, Weakley]
Dico	345	Plantae		Magnoliophyta			Magnoliopsida			Asterales				Asteraceae				Symphyotrichum		walteri				(Alexander) G.L. Nesom								Mesic pine savannas (MPS-CP), wet pine flatwoods (WPF-T).		Infrequent. Oct–Dec. Thornhill 971 (NCSC). Specimens seen in the vicinity: Sandy Run [Hancock]: Taggart SARU 552 (WNC!). [= Aster squarrosus Walter sensu RAB; = FNA, Weakley]
Dico	346	Plantae		Magnoliophyta			Magnoliopsida			Asterales				Asteraceae				Trilisa		odoratissima				(J.F. Gmel.) Cass.								Pine/scrub oak sandhills (PSOS-MT), wet pine flatwoods (WPF-T), wet pine savannas (SPS-T, SPS-RF).		Frequent. Late Jul–Oct; Sep–Nov. Thornhill 1518 (NCSC). Specimens seen in the vicinity: Sandy Run [Hancock]: Taggart SARU 497 (WNC!; as Carphephorus odoratissimus). [< T. odoratissima (J.F. Gmel.) Cass. sensu RAB; = Carphephorus odoratissimus (J.F. Gmel.) H.J.-C. Hebert var. odoratissimus sensu FNA; = Weakley]
Dico	347	Plantae		Magnoliophyta			Magnoliopsida			Asterales				Asteraceae				Trilisa		paniculata				(J.F. Gmel.) Cass.								Wet pine flatwoods (WPF-T), wet pine savannas (SPS-RF).		Infrequent. Aug–Oct; Sep–Nov. Thornhill 1540 (NCSC). Specimens seen in the vicinity: Sandy Run [Neck]: Taggart SARU 530 (WNC!; as Carphephorus paniculatus). [= RAB; = Carphephorus paniculatus (J.F. Gmel.) H.J.-C. Hebert sensu FNA; = Weakley]
Dico	348	Plantae		Magnoliophyta			Magnoliopsida			Asterales				Asteraceae				Vernonia		angustifolia				Michx.								Sandhills.		Late Jun–early Sep; Sep–Oct. Reported from Sandy Run [Neck] by LeBlond and Weakley (1991), but no specimens have been seen in Shaken Creek Preserve by the present author. [> V. angustifolia Michx. var. angustifolia, V. angustifolia Michx. var. scabberima (Nutt.) S.B. Jones & W.Z. Faust sensu RAB; = FNA; > V. angustifolia Michx. various varieties sensu Weakley]
Dico	349	Plantae		Magnoliophyta			Magnoliopsida			Asterales				Asteraceae				Vernonia		noveboracensis				(L.) Michx.								Pine savannas.		Jul–Sep; Aug–Oct. Not seen in Shaken Creek Preserve by the present author. Specimens seen in the vicinity: Sandy Run [Hancock]: Taggart SARU 355 (WNC!). [= RAB, FNA, Weakley]
Dico	350	Plantae		Magnoliophyta			Magnoliopsida			Fagales				Betulaceae				Betula		nigra				L.								wet pine flatwoods (WPF-T)		Rare. Mar–Apr; May–Jun. Thornhill 366 (NCSC). [= RAB, FNA, Weakley]
Dico	351	Plantae		Magnoliophyta			Magnoliopsida			Lamiales				Bignoniaceae				Bignonia		capreolata				L.								Margins of wet pine savannas (WLPS) and adjacent swamps.		Infrequent. Apr–May; Jul–Aug. Thornhill 1148 (NCSC). Specimens seen in the vicinity: Sandy Run [Patterson]: Taggart SARU 323 (WNC!). [= Anisostichus capreolata (L.) Bureau sensu RAB; = Weakley]
Dico	352	Plantae		Magnoliophyta			Magnoliopsida			Lamiales				Bignoniaceae				Campsis		radicans				(L.) Seem. ex Bureau								Margins of wet pine flatwoods (WPF-T) and adjacent swamps.		Infrequent. Jun–Jul; Sep–Oct. Thornhill 1482 (NCSC). Specimens seen in the vicinity: Sandy Run [Hancock]: Taggart SARU 198 (WNC!). [= RAB, Weakley]
Dico	353	Plantae		Magnoliophyta			Magnoliopsida			Asterales				Campanulaceae				Lobelia		canbyi				A. Gray								Wet pine flatwoods (WPF-T), wet pine savannas (SPS-T, SPS-RF, WLPS, VWLPS).		Frequent. Jul–Nov. Thornhill 34, 49, 740, 804, 840, 873 (NCSC). Specimens seen in the vicinity: Sandy Run [Hancock]: Taggart SARU 446 (WNC!). [= RAB, Weakley]
Dico	354	Plantae		Magnoliophyta			Magnoliopsida			Asterales				Campanulaceae				Lobelia		glandulosa				Walter								Wet pine savannas (SPS-T, WLPS, VWLPS).		Occasional. Sep–Oct. Thornhill 35, 921 (NCSC). Specimens seen in the vicinity: Sandy Run [Hancock]: Taggart SARU 478 (WNC!). [= RAB, Weakley]
Dico	355	Plantae		Magnoliophyta			Magnoliopsida			Asterales				Campanulaceae				Lobelia		nuttallii				Schult.								Wet pine flatwoods (WPF-T), wet pine savannas (SPS-T, SPS-RF, WLPS, VWLPS).		Frequent. May–Nov. Thornhill 3, 337, 427, 479, 488, 526 (NCSC). Specimens seen in the vicinity: Sandy Run [Hancock]: Taggart SARU 152 (WNC!); Sandy Run [Neck]: Wilbur 53644, 55299 (DUKE!). [= RAB, Weakley]
Dico	356	Plantae		Magnoliophyta			Magnoliopsida			Dipsacales				Caprifoliaceae				Lonicera		sempervirens				L.								Dry forests and woodlands.		Mar–Jul(–Nov); Jul–Sep. Not seen in Shaken Creek Preserve by the present author. Specimens seen in the vicinity: Sandy Run [Neck]: Wilbur 53654 (DUKE!). [= RAB, Weakley]
Dico	357	Plantae		Magnoliophyta			Magnoliopsida			Malvales				Cistaceae				Lechea		minor				L.								Mesic pine savannas (MPS-CP).		Rare. Jul–Aug; Aug–Oct. Thornhill 1551 (NCSC). [= RAB, Weakley]
Dico	358	Plantae		Magnoliophyta			Magnoliopsida			Malvales				Cistaceae				Lechea		pulchella		ramosissima		(Hodgdon) Sorrie & Weakley								Wet pine savannas (SPS-RF, WLPS), adjacent roadsides.		Infrequent. Jun–Aug; Aug–Oct. Thornhill 623, 751 (NCSC). Specimens seen in the vicinity: Sandy Run [Patterson]: Taggart SARU 364 (WNC!). [< L. leggettii Britton & Hollick sensu RAB; = Weakley]
Dico	359	Plantae		Magnoliophyta			Magnoliopsida			Ericales				Clethraceae				Clethra		alnifolia				L.								Wet pine flatwoods (WPF-T), wet pine savannas (SPS-T, SPS-RF, WLPS, VWLPS).		Frequent. Jun–Jul; Sep–Oct. Thornhill 585, 613, 670, 715 (NCSC). Specimens seen in the vicinity: Sandy Run [Hancock]: Taggart SARU 258 (WNC!); Sandy Run [Neck]: Wilbur 53648, 53702 (DUKE!). [= C. alnifolia L. var. alnifolia sensu RAB; = FNA, Weakley]
Dico	360	Plantae		Magnoliophyta			Magnoliopsida			Solanales				Convolvulaceae				Cuscuta		gronovii				Willd. ex Roem. & Schult.								Margins of wet pine savannas (VWLPS) and adjacent swamps.		Rare. Aug–Oct. Thornhill 1042 (NCSC). [= RAB, Weakley]
Dico	361	Plantae		Magnoliophyta			Magnoliopsida			Solanales				Convolvulaceae				Cuscuta		pentagona				Engelm.								Pine savannas.		May–Nov. Not seen in Shaken Creek Preserve by the present author. Specimens seen in the vicinity: Sandy Run [Haw’s Run]: Taggart SARU 637 (WNC!). [= RAB, Weakley]
Dico	362	Plantae		Magnoliophyta			Magnoliopsida			Cornales				Cornaceae				Cornus		stricta				Lam.								Wet pine flatwoods (WPF-T).		Rare. Apr–May; Jul–Aug. Thornhill 1491 (NCSC). Specimens seen in the vicinity: Sandy Run [Neck]: Wilbur 53653, 53655, 67087 (DUKE!); Sandy Run [Patterson]: Taggart SARU 211 (WNC!). [= RAB, Weakley]
Dico	363	Plantae		Magnoliophyta			Magnoliopsida			Ericales				Cyrillaceae				Cyrilla		racemiflora				L.								Wet pine flatwoods (WPF-T), wet pine savannas (SPS-T, SPS-RF, WLPS, VWLPS).		Frequent. May–Jul; Sep–Oct. Thornhill 430, 448, 540, 614 (NCSC). Specimens seen in the vicinity: Sandy Run [Neck]: Wilbur 53681 (DUKE!); Sandy Run [RMK]: Taggart SARU 229 (WNC!). [= RAB, FNA, Weakley]
Dico	364	Plantae		Magnoliophyta			Magnoliopsida			Ericales				Diapensiaceae				Pyxidanthera		barbulata				Michx.								Wet pine flatwoods (WPF-T), wet pine savannas (SPS-T, SPS-RF).		Frequent. Mar–Apr; May–Jun. Thornhill 81, 83 (NCSC). Specimens seen in the vicinity: Sandy Run [Patterson]: Taggart SARU 19 (WNC!). [= P. barbulata Michx. var. barbulata sensu RAB; = FNA, Weakley]
Dico	365	Plantae		Magnoliophyta			Magnoliopsida			Caryophyllales				Droseraceae				Dionaea		muscipula				J. Ellis							SC-V, FSC; S3, G3.	Depressions in wet pine flatwoods (WPF-T), wet pine savannas (SPS-T, SPS-RF, WLPS, VWLPS).		Occasional. May–Jun; Jun–Jul. Thornhill 314, 381, 383 (NCSC). Specimens seen in the vicinity: Sandy Run: Bell 17110 (NCU!), Taggart SARU 114 (WNC!), Wilbur 55289 (DUKE!). [= RAB, Weakley]
Dico	366	Plantae		Magnoliophyta			Magnoliopsida			Caryophyllales				Droseraceae				Drosera		brevifolia				Pursh								Wet pine flatwoods (WPF-T), wet pine savannas (SPS-T, SPS-RF, WLPS, VWLPS).		Abundant. Apr–May. Thornhill 104, 159 (NCSC). Specimens seen in the vicinity: Sandy Run [Hancock]: Taggart SARU 82 (WNC!). [= D. leucantha Shinners sensu RAB; = Weakley]
Dico	367	Plantae		Magnoliophyta			Magnoliopsida			Caryophyllales				Droseraceae				Drosera		capillaris				Poir.								Wet pine flatwoods (WPF-T), wet pine savannas (SPS-T, SPS-RF, WLPS, VWLPS).		Frequent. May–Aug. Thornhill 292, 371, 411 (NCSC). Specimens seen in the vicinity: Sandy Run [Hancock]: Taggart SARU 172 (WNC!). [= RAB, Weakley]
Dico	368	Plantae		Magnoliophyta			Magnoliopsida			Caryophyllales				Droseraceae				Drosera		intermedia				Hayne								Wet pine savannas (SPS-T, SPS-RF, WLPS), borrow pits, ditches.		Frequent. Jul–Sep. Thornhill 29, 161, 666 (NCSC). Specimens seen in the vicinity: Sandy Run [Hancock]: Taggart SARU 144 (WNC!); Sandy Run [Neck]: Wilbur 55301 (DUKE!). [= RAB, Weakley]
Dico	369	Plantae		Magnoliophyta			Magnoliopsida			Ericales				Ebenaceae				Diospyros		virginiana				L.								Pine/scrub oak sandhills (PSOS-MT), mesic pine savannas (MPS-CP), wet pine flatwoods (WPF-T), wet pine savannas (SPS-T, SPS-RF, WLPS, VWLPS).		Frequent. May–Jun; Sep–Dec. Thornhill 283, 709 (NCSC). Specimens seen in the vicinity: Sandy Run [Patterson]: Taggart SARU 213 (WNC!). [= RAB, FNA, Weakley]
Dico	370	Plantae		Magnoliophyta			Magnoliopsida			Ericales				Ericaceae				Chamaedaphne		calyculata				(L.) Moench								Pine savannas.		Mar–Apr; Jun–Oct. Not seen in Shaken Creek Preserve by the present author. Specimens seen in the vicinity: Holly Shelter: Fox 158 (NCSC!); Sandy Run [Hancock]: Taggart SARU 15 (WNC!). [= Cassandra calyculata (L.) D. Don sensu RAB; = FNA, Weakley]
Dico	371	Plantae		Magnoliophyta			Magnoliopsida			Ericales				Ericaceae				Eubotrys		racemosa				(L.) Nutt.								Wet pine flatwoods (WPF-T).		Occasional. Late Mar–early Jun; Sep–Oct. Thornhill 1291, 1471, 1511, 1546 (NCSC). Specimens seen in the vicinity: Sandy Run [Neck]: Wilbur 55259 (DUKE!; as Leucothoe racemosa); Sandy Run [O’Berry]:Taggart SARU 93 (WNC!). [= Leucothoe racemosa (L.) A. Gray sensu RAB; = FNA, Weakley]
Dico	372	Plantae		Magnoliophyta			Magnoliopsida			Ericales				Ericaceae				Gaylussacia		dumosa				(Andrews) Torr. & A. Gray								Mesic pine savannas (MPS-CP), wet pine flatwoods (WPF-T), wet pine savannas (SPS-T, SPS-RF, WLPS, VWLPS).		Abundant. Mar–Jun; Jun–Oct. Thornhill 165, 197, 210, 214, 228, 233, 258, 592, 806 (NCSC). Specimens seen in the vicinity: Sandy Run [Hancock]: Taggart SARU 113 (WNC!). [< RAB; = FNA, Weakley]
Dico	373	Plantae		Magnoliophyta			Magnoliopsida			Ericales				Ericaceae				Gaylussacia		frondosa				(L.) Torr. & A. Gray ex Torr.								Pine/scrub oak sandhills (PSOS-MT), mesic pine savannas (MPS-CP), wet pine flatwoods (WPF-T), wet pine savannas (SPS-T, SPS-RF, WLPS, VWLPS).		Abundant. Late Mar–May; Jun–Aug. Thornhill 120, 146, 204, 212, 215, 229, 234, 290 (NCSC). Specimens seen in the vicinity: Sandy Run [Neck]: Wilbur 53650, 55288, 55291, 63768, 63781, 67097 (DUKE!); Sandy Run [Patterson]: Taggart SARU 106 (WNC!). [= G. frondosa var. frondosa sensu RAB; = FNA, Weakley]
Dico	374	Plantae		Magnoliophyta			Magnoliopsida			Ericales				Ericaceae				Kalmia		carolina				Small								Wet pine flatwoods (WPF-T), wet pine savannas (SPS-T, SPS-RF).		Frequent. Apr–May(–Sep); Sep–Oct. Thornhill 164, 182 (NCSC). Specimens seen in the vicinity: Sandy Run [O’Berry]: Taggart SARU 68 (WNC!), Weakley 7218 (NCU!). [= K. angustifolia L. var. caroliniana (Small) Fernald sensu RAB, FNA; = Weakley]
Dico	375	Plantae		Magnoliophyta			Magnoliopsida			Ericales				Ericaceae				Leucothoe		axillaris				(Lam.) D. Don								Pine savannas.		Late Mar–May; Sep–Oct. Not seen in Shaken Creek Preserve by the present author. Specimens seen in the vicinity: Sandy Run [O’Berry]: Taggart SARU 669 (WNC!). [= L. axillaris (Lam.) D. Don var. axillaris sensu RAB; = FNA, Weakley]
Dico	376	Plantae		Magnoliophyta			Magnoliopsida			Ericales				Ericaceae				Lyonia		ligustrina				(L.) DC.								Wet pine flatwoods (WPF-T), wet pine savannas (SPS-T, SPS-RF, WLPS, VWLPS).		Frequent. Late Apr–Jul; Sep–Oct. If one chooses to recognize varieties, the material collected by the author would generally be referable to var. foliosiflora, the more common variety on the North Carolina Coastal Plain. Thornhill 417, 591, 911, 1526 (NCSC). Specimens seen in the vicinity: Sandy Run [Neck]: Wilbur 53649, 53704, 55305, 55320 (DUKE!); Sandy Run [O’Berry]: Taggart SARU 92 (WNC!; as …
Dico	377	Plantae		Magnoliophyta			Magnoliopsida			Ericales				Ericaceae				Lyonia		lucida				(Lam.) K. Koch								Wet pine flatwoods (WPF-T), wet pine savannas (SPS-T, SPS-RF, WLPS, VWLPS).		Frequent. Apr–early Jun; Sep–Oct. Thornhill 116, 133, 167, 180 (NCSC). Specimens seen in the vicinity: Holly Shelter: Fox 160 (NCSC!); Sandy Run [Neck]: Wilbur 53667, 63770, 63783, 63784, 63785, 67088 (DUKE!); Sandy Run [O’Berry]: Taggart SARU 71 (WNC!), Weakley 7221 (NCU!). [= RAB, FNA, Weakley]
Dico	378	Plantae		Magnoliophyta			Magnoliopsida			Ericales				Ericaceae				Lyonia		mariana				(L.) D. Don								Wet pine flatwoods (WPF-T), wet pine savannas (SPS-T, SPS-RF, WLPS, VWLPS).		Frequent. Apr–May; Sep–Oct. Thornhill 118, 178, 236 (NCSC). Specimens seen in the vicinity: Sandy Run [Hancock]: Taggart SARU 96 (WNC!); Sandy Run [Neck]: Wilbur 55308, 63766, 67096 (DUKE!). [= RAB, FNA, Weakley]
Dico	379	Plantae		Magnoliophyta			Magnoliopsida			Ericales				Ericaceae				Rhododendron		atlanticum				(Ashe) Rehder								Wet pine flatwoods (WPF-T), wet pine savannas (SPS-T, SPS-RF).		Occasional. Apr–May(–later). Thornhill 113, 179 (NCSC). Specimens seen in the vicinity: Sandy Run [Hancock]: Taggart SARU 62 (WNC!); Sandy Run [Neck]: Levy s.n. (DUKE!), Wilbur 63767, 67098 (DUKE!). [= RAB, FNA, Weakley]
Dico	380	Plantae		Magnoliophyta			Magnoliopsida			Ericales				Ericaceae				Rhododendron		viscosum				(L.) Torr.								Wet pine flatwoods (WPF-T), wet pine savannas (SPS-T, SPS-RF).		Occasional. Late May–Jul; Jul–Oct. Thornhill 225, 266, 308 (NCSC). Specimens seen in the vicinity: Sandy Run [Neck]: LeBlond 4972 (NCU; as R. viscosum var. serrulatum); Sandy Run [Patterson]: Taggart SARU 596 (WNC!). [> R. viscosum (L.) Torr. var. serrulatum (Small) Ahles, R. viscosum (L.) Torr. var. viscosum sensu RAB, Weakley; = FNA]
Dico	381	Plantae		Magnoliophyta			Magnoliopsida			Ericales				Ericaceae				Vaccinium		arboreum				Marshall								Mesic pine savannas.		Late Apr–Jun; Sep–Oct. Not seen in Shaken Creek Preserve by the present author. Specimens seen in the vicinity: Sandy Run [RMK]: Taggart SARU 219 (WNC!). [= RAB, FNA, Weakley]
Dico	382	Plantae		Magnoliophyta			Magnoliopsida			Ericales				Ericaceae				Vaccinium		crassifolium				Andrews								Wet pine flatwoods (WPF-T), wet pine savannas (SPS-T, SPS-RF, WLPS, VWLPS).		Abundant. Apr–May; Jun–Jul. Thornhill 117, 153, 160, 185 (NCSC). Specimens seen in the vicinity: Sandy Run [Hancock]: Taggart SARU 76 (WNC!). [= RAB; < FNA; = Weakley]
Dico	383	Plantae		Magnoliophyta			Magnoliopsida			Ericales				Ericaceae				Vaccinium		formosum				Andrews								Wet pine flatwoods (WPF-T), wet pine savannas (SPS-T, SPS-RF, WLPS).		Occasional. Late Feb–May; Jun–Aug. Thornhill 147, 150, 166, 173, 183, 264, 303, 305 (NCSC). Specimens seen in the vicinity: Sandy Run [Hancock]: Taggart SARU 23 (WNC!). [< V. corymbosum L. sensu RAB, FNA; = Weakley]
Dico	384	Plantae		Magnoliophyta			Magnoliopsida			Ericales				Ericaceae				Vaccinium		fuscatum				Aiton								Wet pine flatwoods (WPF-T), wet pine savannas (SPS-T, SPS-RF, WLPS, VWLPS).		Frequent. Late Feb–May; Jun–Aug. Thornhill 78, 79, 82, 92, 101, 267, 277, 302, 763 (NCSC). Specimens seen in the vicinity: Sandy Run [Patterson]: Taggart SARU 216 (WNC!). [= V. atrococcum (Gray) A. Heller sensu RAB; < V. corymbosum L. sensu FNA; = Weakley]
Dico	385	Plantae		Magnoliophyta			Magnoliopsida			Ericales				Ericaceae				Vaccinium		stamineum				L.								Wet pine savannas (SPS-RF).		Apr–Jun; Aug–Oct. Reported from Shaken Creek Preserve by LeBlond (2000), but no specimens have been seen by the present author. [> V. stamineum L. var. stamineum sensu RAB; = FNA; > V. stamineum L. various varieties sensu Weakley]
Dico	386	Plantae		Magnoliophyta			Magnoliopsida			Ericales				Ericaceae				Vaccinium		tenellum				Aiton								Pine/scrub oak sandhills (PSOS-MT), mesic pine savannas (MPS-CP), wet pine flatwoods (WPF-T), wet pine savannas (SPS-T, SPS-RF, WLPS, VWLPS).		Abundant. Late Mar–early May; Jun–Jul. Thornhill 145, 184, 755, 1222, 1423, 1424 (NCSC). Specimens seen in the vicinity: Holly Shelter: Fox 161 (NCSC!); Sandy Run [Hancock]: Ahles 28232 (NCU!); Sandy Run [Neck]: Wilbur 63769, 63775 (DUKE!); Sandy Run [Patterson]: Taggart SARU 73 (WNC!). [= RAB, FNA, Weakley]
Dico	387	Plantae		Magnoliophyta			Magnoliopsida			Ericales				Ericaceae				Zenobia		pulverulenta				(W. Bartram ex Willd.) Pollard								Wet pine flatwoods (WPF-T), wet pine savannas (SPS-T, SPS-RF).		Frequent. Apr–Jun; Sep–Oct. Thornhill 231, 259, 307, 508 (NCSC). Specimens seen in the vicinity: Sandy Run [Hancock]: Taggart SARU 181 (WNC!). [= RAB, FNA, Weakley]
Dico	388	Plantae		Magnoliophyta			Magnoliopsida			Malpighiales				Euphorbiaceae				Cnidoscolus		stimulosus				(Michx.) Engelm. & A. Gray								Pine/scrub oak sandhills (PSOS-MT), mesic pine savannas (MPS-CP), wet pine flatwoods (WPF-T).		Occasional. Late Mar–Aug; May–Sep. Thornhill 1275 (NCSC). Specimens seen in the vicinity: Sandy Run [RMK]: Taggart SARU 220 (WNC!). [= RAB, Weakley]
Dico	389	Plantae		Magnoliophyta			Magnoliopsida			Malpighiales				Euphorbiaceae				Euphorbia		ipecacuanhae				L.								Pine/scrub oak sandhills (PSOS-MT), mesic pine savannas (MPS-CP).		Infrequent. Feb–May. Thornhill 1418 (NCSC). Specimens seen in the vicinity: Sandy Run [Neck]: Wilbur 55277 (DUKE!). [= RAB, Weakley]
Dico	390	Plantae		Magnoliophyta			Magnoliopsida			Malpighiales				Euphorbiaceae				Tragia		urens				L.								Pine/scrub oak sandhills (PSOS-MT).		Rare. May–Oct. Thornhill 1419 (NCSC). Specimens seen in the vicinity: Sandy Run [Hancock]: Ahles 28231A (NCU!; one duplicate specimen labeled as T. linearifolia Elliott). [= RAB, Weakley]
Dico	391	Plantae		Magnoliophyta			Magnoliopsida			Fabales				Fabaceae				Amorpha		georgiana				Wilbur							State E, FSC; S2, G3T2.	Mesic pine savannas (MPS-CP).		Rare. Apr–Jun; Jul–Oct. Thornhill 1073, 1239 (NCSC); Thornhill 1177 (NCU). [< RAB; = Weakley]
Dico	392	Plantae		Magnoliophyta			Magnoliopsida			Fabales				Fabaceae				Amorpha		herbacea		herbacea		Walter								Mesic pine savannas (MPS-CP).		Rare. May–Jul; Jul–Oct. Thornhill 1541 (NCSC). Specimens seen in the vicinity: Sandy Run [Neck]: Wilbur 55279 (DUKE!). [< A. herbacea Walter sensu RAB; = Weakley]
Dico	393	Plantae		Magnoliophyta			Magnoliopsida			Fabales				Fabaceae				Apios		americana				Medik.								Wet pine flatwoods (WPF-T).		Rare. Jun–Aug; Jul–Sep. Thornhill 1179 (NCSC). [= RAB, Weakley]
Dico	394	Plantae		Magnoliophyta			Magnoliopsida			Fabales				Fabaceae				Baptisia		cinerea				(Raf.) Fernald & B.G. Schub.								Pine savannas.		Late Apr–Jun; Jun–Jul. Not seen in Shaken Creek Preserve by the present author. Specimens seen in the vicinity: Sandy Run [Hancock]: Taggart SARU 129 (WNC!). [= RAB, Weakley]
Dico	395	Plantae		Magnoliophyta			Magnoliopsida			Fabales				Fabaceae				Baptisia		tinctoria				(L.) Vent.								Pine savannas and wet pine flatwoods.		Apr–Aug; Jul–Nov. Not seen in Shaken Creek Preserve by the present author. Specimens seen in the vicinity: Sandy Run [Hancock]: Taggart SARU 176 (WNC!). [= RAB, Weakley]
Dico	396	Plantae		Magnoliophyta			Magnoliopsida			Fabales				Fabaceae				Centrosema		virginianum				(L.) Benth.								Mesic pine savannas (MPS-CP).		Occasional. Jun–Aug; Jul–Oct. Thornhill 972 (NCSC). Specimens seen in the vicinity: Sandy Run [Hancock]: Taggart SARU 423 (WNC!). [= RAB, Weakley]
Dico	397	Plantae		Magnoliophyta			Magnoliopsida			Fabales				Fabaceae				Chamaecrista		fasciculata		fasciculata		(Michx.) Greene								Pine savannas, wet pine flatwoods.		Jun–Sep; Jul–Nov. Not seen in Shaken Creek Preserve by the present author. Specimens seen in the vicinity: Sandy Run [Hancock]: Taggart SARU 406 (WNC!). [< Cassia fasciculata Michx. sensu RAB; = Weakley]
Dico	398	Plantae		Magnoliophyta			Magnoliopsida			Fabales				Fabaceae				Chamaecrista		nictitans		nictitans		(L.) Moench								Wet pine savannas (VWLPS), adjacent roadsides.		Infrequent. Jun–Oct; Jul–Nov. Thornhill 1172 (NCSC). Specimens seen in the vicinity: Sandy Run [Patterson]: Taggart SARU 643 (WNC!). [< Cassia nictitans L. sensu RAB; = Weakley]
Dico	399	Plantae		Magnoliophyta			Magnoliopsida			Fabales				Fabaceae				Crotalaria		purshii				DC.								Mesic to dry pinelands, sandy openings, roadsides.		Reported from Sandy Run [Neck] by LeBlond and Weakley (1991) (and seen there by the present author), but no specimens have been seen in Shaken Creek Preserve. [= RAB, Weakley]
Dico	400	Plantae		Magnoliophyta			Magnoliopsida			Fabales				Fabaceae				Desmodium		ciliare				(Muhl. ex Willd.) DC.								Fields, woodland borders, disturbed areas.		Jun–Sep; Aug–Oct. Reported from Sandy Run [Neck] by LeBlond and Weakley (1991), but no specimens have been seen in Shaken Creek Preserve by the present author. [= RAB, Weakley]
Dico	401	Plantae		Magnoliophyta			Magnoliopsida			Fabales				Fabaceae				Desmodium		lineatum				(Michx.) DC.								Sandhills and other dry forests and woodlands.		Jun–Sep; Aug–Oct. Reported from Sandy Run [Neck] by LeBlond and Weakley (1991), but no specimens have been seen in Shaken Creek Preserve by the present author. [= RAB, Weakley]
Dico	402	Plantae		Magnoliophyta			Magnoliopsida			Fabales				Fabaceae				Desmodium		paniculatum				(L.) DC.								Pine savannas and flatwoods, fields, woodland borders, disturbed areas.		Jun–Sep; Aug–Oct. Reported from Sandy Run [Neck] by LeBlond and Weakley (1991), but no specimens have been seen in Shaken Creek Preserve by the present author. [= RAB; > D. paniculatum var. epepetiolatum B.G. Schub, D. paniculatum var. paniculatum sensu Weakley]
Dico	403	Plantae		Magnoliophyta			Magnoliopsida			Fabales				Fabaceae				Desmodium		tenuifolium				Torr. & A. Gray								Wet pine flatwoods (WPF-T), wet pine savannas (WLPS, VWLPS).		Occasional. Jul–Aug; Aug–Oct. Thornhill 827, 1046, 1084 (NCSC). Specimens seen in the vicinity: Sandy Run [Hancock]: Ahles 32702 (NCU!), Taggart SARU 447 (WNC!). [= RAB, Weakley]
Dico	404	Plantae		Magnoliophyta			Magnoliopsida			Fabales				Fabaceae				Galactia		regularis				(L.) Britton, Sterns, & Poggenb.								Wet pine flatwoods (WPF-T).		Jul–Sep; Aug–Oct. Reported from Shaken Creek Preserve by LeBlond (2000), but no specimens have been seen on site by the present author. Specimens seen in the vicinity: Sandy Run [Hancock]: Taggart SARU 368 (WNC!; reported for roadsides and disturbed areas). [> G. macreei M.A. Curtis, G. volubilis (L.) Britton sensu RAB; = Weakley]
Dico	405	Plantae		Magnoliophyta			Magnoliopsida			Fabales				Fabaceae				Indigofera		caroliniana				Mill.								Mesic pine savannas.		Jun–Aug; Jul–Oct. Not seen in Shaken Creek Preserve by the present author. Specimens seen in the vicinity: Sandy Run [RMK]: Taggart SARU 389 (WNC!). [= RAB, Weakley]
Dico	406	Plantae		Magnoliophyta			Magnoliopsida			Fabales				Fabaceae				Lespedeza		angustifolia				(Pursh) Elliott								Mesic pine savannas (MPS-CP).		Rare. Aug–Oct; Sep–Nov. Thornhill 1553 (NCSC). [= RAB, Weakley]
Dico	407	Plantae		Magnoliophyta			Magnoliopsida			Fabales				Fabaceae				Lespedeza		capitata				Michx.								Pine/scrub oak sandhills (PSOS-MT), mesic pine savannas (MPS-CP), wet pine savannas (WLPS), roadsides.		Infrequent. Aug–Oct; Sep–Nov. Thornhill 1031, 1075 (NCSC). Specimens seen in the vicinity: Sandy Run [Hancock]: Taggart SARU 467 (WNC!); Sandy Run [Neck]: Wilbur 57632 (DUKE!). [= RAB, Weakley]
Dico	408	Plantae		Magnoliophyta			Magnoliopsida			Fabales				Fabaceae				Lespedeza		hirta		curtissii		(Clewell) Isely								Pine/scrub oak sandhills (PSOS-MT).		Rare. Aug–Oct; Sep–Nov. Thornhill 1539 (NCSC). Specimens seen in the vicinity: Sandy Run [RMK]: Taggart SARU 475 (WNC!). [< L. hirta (L.) Hornem. sensu RAB; = Weakley]
Dico	409	Plantae		Magnoliophyta			Magnoliopsida			Fabales				Fabaceae				Strophostyles		umbellata				(Muhl. ex Willd.) Britton								Dry, sandy woodlands.		Jun–Sep; Aug–Oct. Reported from Sandy Run [Neck] by LeBlond and Weakley (1991), but no specimens have been seen in Shaken Creek Preserve by the present author. [= RAB, Weakley]
Dico	410	Plantae		Magnoliophyta			Magnoliopsida			Fabales				Fabaceae				Stylosanthes		biflora				(L.) Britton, Sterns & Poggenb.								Mesic pine savannas (MPS-CP).		Rare. Jun–Aug; Jul–Oct. Thornhill 1473 (NCSC). [= RAB, Weakley]
Dico	411	Plantae		Magnoliophyta			Magnoliopsida			Fabales				Fabaceae				Tephrosia		florida				(F. Dietr.) C.E. Wood								Wet pine flatwoods (WPF-T).		May–Jul; Jun–Sep. Reported from Shaken Creek Preserve by LeBlond (2000), but no specimens have been seen on site by the present author. [= RAB, Weakley]
Dico	412	Plantae		Magnoliophyta			Magnoliopsida			Fabales				Fabaceae				Tephrosia		hispidula				(Michx.) Pers.								Wet pine flatwoods (WPF-T), wet pine savannas (WLPS).		Occasional. May–Aug; Jul–Oct. Thornhill 416, 553, 602, 702 (NCSC). Specimens seen in the vicinity: Sandy Run [Hancock]: Taggart SARU 321 (WNC!). [= RAB, Weakley]
Dico	413	Plantae		Magnoliophyta			Magnoliopsida			Fabales				Fabaceae				Tephrosia		spicata				(Walter) Torr. & A. Gray								Woodlands and roadsides.		Jun–Aug; Jul–Oct. Reported from Sandy Run [Neck] by LeBlond and Weakley (1991), but no specimens have been seen in Shaken Creek Preserve by the present author. [= RAB, Weakley]
Dico	414	Plantae		Magnoliophyta			Magnoliopsida			Fabales				Fabaceae				Zornia		bracteata				J.F. Gmel.								Flatwoods, sandhills, sandy roadsides.		Jun–Aug; Jul–Oct. Reported from Sandy Run [Neck] by LeBlond and Weakley (1991), but no specimens have been seen in Shaken Creek Preserve by the present author. [= RAB, Weakley]
Dico	415	Plantae		Magnoliophyta			Magnoliopsida			Fagales				Fagaceae				Quercus		coccinea				Münchh.								Pine/scrub oak sandhills (PSOS-MT).		Infrequent. Apr; Sep–Nov (of second year). Thornhill 1543 (NCSC). [= RAB, FNA, Weakley]
Dico	416	Plantae		Magnoliophyta			Magnoliopsida			Fagales				Fagaceae				Quercus		falcata				Michx.								Pine/scrub oak sandhills (PSOS-MT).		Infrequent. Apr; Sep–Nov (of second year). Thornhill 1329 (NCSC). Specimens seen in the vicinity: Sandy Run [Neck]: Taggart SARU 297, (WNC!), Wilbur 55278 (DUKE!). [= Q. falcata var. falcata sensu RAB; = FNA, Weakley]
Dico	417	Plantae		Magnoliophyta			Magnoliopsida			Fagales				Fagaceae				Quercus		incana				W. Bartram								Pine/scrub oak sandhills (PSOS-MT).		Infrequent. Apr; Sep–Nov (of second year). Thornhill 1327 (NCSC). Specimens seen in the vicinity: Sandy Run [Neck]: Taggart SARU 295 (WNC!). [= RAB, FNA, Weakley]
Dico	418	Plantae		Magnoliophyta			Magnoliopsida			Fagales				Fagaceae				Quercus		laurifolia				Michx.								Wet pine flatwoods (WPF-T), wet pine savannas (WLPS, VWLPS).		Frequent. Mar–Apr; Sep–Nov (of second year). Thornhill 429, 1022 (NCSC). Specimens seen in the vicinity: Sandy Run [Hancock]: Taggart SARU 206 (WNC!). [< RAB; = FNA, Weakley]
Dico	419	Plantae		Magnoliophyta			Magnoliopsida			Fagales				Fagaceae				Quercus		margarettae				(Ashe) Small								Pine/scrub oak sandhills (PSOS-MT).		Infrequent. Apr; Sep–Nov. Thornhill 1328 (NCSC). Specimens seen in the vicinity: Sandy Run [Neck]: Taggart SARU 296 (WNC!). [= Q. margaretta Ahles ex Small sensu RAB; = FNA, Weakley]
Dico	420	Plantae		Magnoliophyta			Magnoliopsida			Fagales				Fagaceae				Quercus		marilandica		marilandica		Münchh.								Pine/scrub oak sandhills (PSOS-MT).		Infrequent. Apr; Sep–Nov (of second year). Thornhill 1317 (NCSC). [< Q. marilandica Münchh. sensu RAB; = FNA, Weakley]
Dico	421	Plantae		Magnoliophyta			Magnoliopsida			Fagales				Fagaceae				Quercus		nigra				L.								Wet pine savannas (SPS-RF, WLPS, VWLPS).		Occasional. Apr; Sep–Nov (of second year). Thornhill 203, 207, 282, 362 (NCSC). Specimens seen in the vicinity: Sandy Run [Neck]: Wilbur 55257 (DUKE!); Sandy Run [Patterson]: Taggart SARU 212 (WNC!). [= RAB, FNA, Weakley]
Dico	422	Plantae		Magnoliophyta			Magnoliopsida			Fagales				Fagaceae				Quercus		stellata				Wangenh.								Upland forests and woodlands.		Apr; Sep–Nov (of same year). Not seen in Shaken Creek Preserve by the present author. Specimens seen in the vicinity: Sandy Run [Neck]: Wilbur 55283 (DUKE!). [= RAB, FNA, Weakley]
Dico	423	Plantae		Magnoliophyta			Magnoliopsida			Fagales				Fagaceae				Quercus		velutina				Lam.								Wet pine flatwoods.		Apr; Sep–Oct (of second year). Not seen in Shaken Creek Preserve by the present author. Specimens seen in the vicinity: Sandy Run [Neck]: Taggart SARU 584 (WNC!). [= RAB, FNA, Weakley]
Dico	424	Plantae		Magnoliophyta			Magnoliopsida			Gentianales				Gelsemiaceae				Gelsemium		sempervirens				J. St.-Hil.								Pine/scrub oak sandhills (PSOS-MT), mesic pine savannas (MPS-CP), wet pine flatwoods (WPF-T).		Occasional. Mar–early May; Sep–Nov. Thornhill 84 (NCSC). Specimens seen in the vicinity: Sandy Run [Hancock]: Taggart SARU 11 (WNC!). [= RAB, Weakley]
Dico	425	Plantae		Magnoliophyta			Magnoliopsida			Gentianales				Gentianaceae				Bartonia		verna				Raf. ex Barton							W1; S2, G5?.	Wet pine savannas (SPS-T).		Infrequent. (Nov–)Feb–Apr(–Jun); Apr–Jun. Thornhill 1250 (NCSC). Specimens seen in the vicinity: Sandy Run: Taggart SARU 572 (WNC!). [= RAB, Weakley]
Dico	426	Plantae		Magnoliophyta			Magnoliopsida			Gentianales				Gentianaceae				Bartonia		virginica				(L.) Britton, Sterns & Poggenb.								Wet pine savannas (SPS-T, SPS-PF, WLPS, VWLPS).		Infrequent. Jul–Oct; Sep–Oct. Thornhill 749, 907 (NCSC). Specimens seen in the vicinity: Sandy Run [Hancock]: Taggart SARU 493 (WNC!). [= RAB, Weakley]
Dico	427	Plantae		Magnoliophyta			Magnoliopsida			Gentianales				Gentianaceae				Gentiana		autumnalis				L.								Wet pine flatwoods (WPF-T), wet pine savannas (WLPS, VWLPS).		Occasional. Late Sep–mid Jan. Thornhill 47, 1234 (NCSC). Specimens seen in the vicinity: Sandy Run [Patterson]: Taggart SARU 510 (WNC!). [= RAB, Weakley]
Dico	428	Plantae		Magnoliophyta			Magnoliopsida			Gentianales				Gentianaceae				Gentiana		catesbaei				Walter								Wet pine savannas (SPS-T, WLPS, VWLPS).		Infrequent. Late Sep–Nov. Thornhill 1204, 1230, 1233 (NCSC). Specimens seen in the vicinity: Sandy Run [Hancock]: Taggart SARU 548 (WNC!). [= RAB, Weakley]
Dico	429	Plantae		Magnoliophyta			Magnoliopsida			Gentianales				Gentianaceae				Gentiana		saponaria				L.								Wet pine savannas (WLPS, VWLPS).		Rare. Sep–Nov. Thornhill 1183, 1231 (NCSC). [= RAB, Weakley]
Dico	430	Plantae		Magnoliophyta			Magnoliopsida			Gentianales				Gentianaceae				Sabatia		angularis				(L.) Pursh								Forests, woodlands, marshes, fields.		Jul–Aug; Sep–Oct. Not seen in Shaken Creek Preserve by the present author. Specimens seen in the vicinity: Sandy Run [Neck]: Wilbur 53669, 53672 (DUKE!). [= RAB, Weakley]
Dico	431	Plantae		Magnoliophyta			Magnoliopsida			Gentianales				Gentianaceae				Sabatia		brachiata				Elliott								Pine savannas and flatwoods.		Late May–Jul; Aug–Sep. Not seen in Shaken Creek Preserve by the present author. Specimens seen in the vicinity: Sandy Run [Hancock]: Ahles 28234 (NCU!), Taggart SARU 260 (WNC!). [= RAB, Weakley]
Dico	432	Plantae		Magnoliophyta			Magnoliopsida			Gentianales				Gentianaceae				Sabatia		campanulata				(L.) Torr.								Wet pine savannas (WLPS, VWLPS).		Occasional. Jun–Aug; Sep–Oct. Thornhill 550, 560, 609, 619 (NCSC). Specimens seen in the vicinity: Sandy Run [Hancock]: Taggart SARU 314 (WNC!). [= RAB, Weakley]
Dico	433	Plantae		Magnoliophyta			Magnoliopsida			Gentianales				Gentianaceae				Sabatia		difformis				(L.) Druce								Wet pine flatwoods (WPF-T), wet pine savannas (SPS-T, SPS-RF, WLPS, VWLPS).		Frequent. May–Sep; Sep–Dec. Thornhill 420, 485, 521, 525, 555, 582, 583, 584, 706 (NCSC). Specimens seen in the vicinity: Sandy Run [Hancock]: Taggart SARU 247 (WNC!), Wilbur 53689 (DUKE!). [= RAB, Weakley]
Dico	434	Plantae		Magnoliophyta			Magnoliopsida			Gentianales				Gentianaceae				Sabatia		gentianoides				Elliott								Wet pine savannas (VWLPS).		Rare. Jul–Aug; Sep–Oct. Thornhill 1450 (NCSC). Specimens seen in the vicinity: Sandy Run [Hancock]: Taggart SARU 375 (WNC!). [= RAB, Weakley]
Dico	435	Plantae		Magnoliophyta			Magnoliopsida			Saxifragales				Haloragaceae				Proserpinaca		pectinata				Lam.								Depressions in pine savannas (WLPS), borrow pits, ditches.		Occasional. Jun–Oct. Thornhill 358, 509, 621 (NCSC). Specimens seen in the vicinity: Sandy Run [Hancock]: Taggart SARU 271 (WNC!). [= RAB, Weakley]
Dico	436	Plantae		Magnoliophyta			Magnoliopsida			Saxifragales				Hamamelidaceae				Fothergilla		gardenii				L.								Margins of wet pine flatwoods (WPF-T) and pocosins.		Infrequent. Mar–May; Sep–Oct. Thornhill 1273 (NCSC). Specimens seen in the vicinity: Sandy Run [Patterson]: Taggart SARU 51 (WNC!). [= RAB, FNA, Weakley]
Dico	437	Plantae		Magnoliophyta			Magnoliopsida			Malpighiales				Hypericaceae				Hypericum		brachyphyllum				(Spach) Steud.							SC-V; S1S2, G5.	Wet pine savannas (SPS-T, WLPS, VWLPS).		Frequent. Jul–Sep. LeBlond 4989, 5736A (NCSC!); Thornhill 415, 478, 527, 606, 615, 716 (NCSC). Specimens seen in the vicinity: Sandy Run: LeBlond 5771 (NCSC!), Taggart SARU 247 (WNC!). [= Weakley]
Dico	438	Plantae		Magnoliophyta			Magnoliopsida			Malpighiales				Hypericaceae				Hypericum		canadense				L.								Wet pine savannas (SPS-T, SPS-RF), adjacent roadsides.		Infrequent. Jul–Sep. Thornhill 707, 720, 795, 803, 904, 940 (NCSC). [= RAB, Weakley]
Dico	439	Plantae		Magnoliophyta			Magnoliopsida			Malpighiales				Hypericaceae				Hypericum		cistifolium				Lam.								Wet pine flatwoods (WPF-T), wet pine savannas (SPS-T, SPS-RF, WLPS, VWLPS).		Frequent. Jun–Aug. Thornhill 459, 607, 683, 718, 799, 805, 843 (NCSC). [= RAB, Weakley]
Dico	440	Plantae		Magnoliophyta			Magnoliopsida			Malpighiales				Hypericaceae				Hypericum		crux-andreae				(L.) Crantz								Wet pine flatwoods (WPF-T), wet pine savannas (SPS-RF, WLPS, VWLPS).		Occasional. Jun–Oct. Thornhill 700, 746 (NCSC). Specimens seen in the vicinity: Sandy Run [Hancock]: Taggart SARU 308 (WNC!). [= H. stans (Michx. ex Willd.) W.P. Adams & N. Robson sensu RAB; = Weakley]
Dico	441	Plantae		Magnoliophyta			Magnoliopsida			Malpighiales				Hypericaceae				Hypericum		densiflorum		densiflorum		Pursh								Wet pine flatwoods (WPF-T), wet pine savannas (SPS-T, SPS-RF, VWLPS).		Occasional. Jun–Sep. Thornhill 910, 953, 1205 (NCSC). Specimens seen in the vicinity: Sandy Run [Neck]: Taggart SARU 325 (WNC!; as H. densiflorum). [< H. densiflorum Pursh sensu RAB; = Weakley]
Dico	442	Plantae		Magnoliophyta			Magnoliopsida			Malpighiales				Hypericaceae				Hypericum		denticulatum				Walter								Wet pine flatwoods (WPF-T), wet pine savannas (WLPS).		Infrequent. Jul–Sep. Thornhill 762, 9665 (NCSC). [= H. denticulatum var. denticulatum sensu RAB; = Weakley]
Dico	443	Plantae		Magnoliophyta			Magnoliopsida			Malpighiales				Hypericaceae				Hypericum		galioides				Lam.								Wet pine flatwoods (WPF-T), wet pine savannas (SPS-RF, WLPS, VWLPS).		Occasional. Jun–Aug. Thornhill 436, 563, 632, 747, 831, 944 (NCSC). Specimens seen in the vicinity: Sandy Run [Haw’s Run]: Taggart SARU 628 (WNC!); Sandy Run [Neck]: LeBlond 2252 (NCU!), Sorrie 5884 (NCU!). [= RAB, Weakley]
Dico	444	Plantae		Magnoliophyta			Magnoliopsida			Malpighiales				Hypericaceae				Hypericum		gentianoides				(L.) Britton, Sterns, & Poggenb.								Wet pine flatwoods (WPF-T), wet pine savannas (SPS-RF, VWLPS), adjacent roadsides.		Occasional. Jul–Oct. Thornhill 513, 599, 636 (NCSC). Specimens seen in the vicinity: Sandy Run [O’Berry]: Taggart SARU 246 (WNC!). [= RAB, Weakley]
Dico	445	Plantae		Magnoliophyta			Magnoliopsida			Malpighiales				Hypericaceae				Hypericum		gymnanthum				Engelm. & A. Gray								Wet pine flatwoods (WPF-T), wet pine savannas (VWLPS), adjacent roadsides.		Occasional. Jun–Sep. Thornhill 1278, 1453 (NCSC). Specimens seen in the vicinity: Sandy Run [O’Berry]: Taggart SARU 292 (WNC!; as H. mutilum var. mutilum). [= RAB, Weakley]
Dico	446	Plantae		Magnoliophyta			Magnoliopsida			Malpighiales				Hypericaceae				Hypericum		hypericoides				(L.) Crantz								Wet pine savannas (WLPS, VWLPS).		Infrequent. May–Aug. Thornhill 460, 846, 1147 (NCSC). Specimens seen in the vicinity: Sandy Run [Hancock]: Taggart SARU 103 (WNC!). [= RAB, Weakley]
Dico	447	Plantae		Magnoliophyta			Magnoliopsida			Malpighiales				Hypericaceae				Hypericum		lloydii				(Svenson) W.P. Adams								Pine savannas.		Jun–Sep. Not seen in Shaken Creek Preserve by the present author. Specimens seen in the vicinity: Sandy Run [Hancock]: Taggart SARU 378 (WNC!; determination by the present author of this specimen is tentative; the voucher may represent merely a branch of H. galioidies). [= RAB, Weakley]
Dico	448	Plantae		Magnoliophyta			Magnoliopsida			Malpighiales				Hypericaceae				Hypericum		mutilum		mutilum		L.								Roadsides adjacent to and scrapes within pine savannas (SPS-RF, VWLPS).		Occasional. Jun–Oct. Thornhill 1340, 1461, 1464, 1487 (NCSC). [< H. mutilum L. sensu RAB; = Weakley]
Dico	449	Plantae		Magnoliophyta			Magnoliopsida			Malpighiales				Hypericaceae				Hypericum		setosum				L.								Wet pine flatwoods (WPF-T), adjacent roadsides.		Rare. May–Sep. Thornhill 1479 (NCSC). Specimens seen in the vicinity: Sandy Run [Hancock]: Taggart SARU 420 (WNC!). [= RAB; Weakley]
Dico	450	Plantae		Magnoliophyta			Magnoliopsida			Malpighiales				Hypericaceae				Hypericum		tenuifolium				Pursh								Wet pine flatwoods (WPF-T).		Occasional. Jun–Sep. Thornhill 1312, 1319 (NCSC). Specimens seen in the vicinity: Sandy Run [Hancock]: Taggart SARU 261 (WNC!); Sandy Run [Neck]: Wilbur 53686 (DUKE!). [= H. reductum (Svenson) W.P. Adams sensu RAB; = Weakley]
Dico	451	Plantae		Magnoliophyta			Magnoliopsida			Malpighiales				Hypericaceae				Hypericum		virginicum				L.								Boggy depressions within or near flatwoods or savannas.		Jul–Sep. No specimens have been seen on site by the present author; however, one specimen (Thornhill 1479, NCSC) was collected in a boggy depression adjacent to a flatwoods just north (< 1 mile) of Shaken Creek Preserve. The presence of this species may be expected in boggy areas on site. [= RAB; Weakley]
Dico	452	Plantae		Magnoliophyta			Magnoliopsida			Fagales				Juglandaceae				Carya		tomentosa				(Poir.) Nutt.								Mesic pine savannas.		Apr–May; Oct. Not seen in Shaken Creek Preserve by the present author. Specimens seen in the vicinity: Sandy Run [RMK]: Taggart SARU 223 (WNC!; as C. alba). [= RAB, FNA, Weakley]
Dico	453	Plantae		Magnoliophyta			Magnoliopsida			Lamiales				Lamiaceae				Hyptis		alata				Shinners								Wet pine savannas (WLPS, VWLPS).		Occasional. Late Jun–Sep. Thornhill 705, 826, 946 (NCSC). Specimens seen in the vicinity: Sandy Run [Hancock]: Taggart SARU 404 (WNC!); Sandy Run [Neck]: Wilbur 57669 (DUKE!). [= RAB, Weakley]
Dico	454	Plantae		Magnoliophyta			Magnoliopsida			Lamiales				Lamiaceae				Lycopus		amplectens				Raf.							W1; S3, G5.	Wet pine savannas (VWLPS).		Rare. Jun–Nov. Thornhill 1089 (NCSC). Specimens seen in the vicinity: Sandy Run: LeBlond 4848, 5069 (NCU!), Taggart SARU 468 (WNC!). [= RAB, Weakley]
Dico	455	Plantae		Magnoliophyta			Magnoliopsida			Lamiales				Lamiaceae				Lycopus		rubellus				Moench								Wet pine savannas (WLPS).		Rare. Jun–Nov. Thornhill 1150 (NCSC). Specimens seen in the vicinity: Sandy Run [Hancock]: Taggart SARU 498 (WNC; see note preceding genus key). [= L. rubellus Moench var. rubellus sensu RAB; = Weakley]
Dico	456	Plantae		Magnoliophyta			Magnoliopsida			Lamiales				Lamiaceae				Physostegia		purpurea				(Walter) S.F. Blake								Wet pine savannas (WLPS, VWLPS).		Infrequent. Late May–early Aug; Jun–Sep. Thornhill 419, 422, 425, 564 (NCSC). Specimens seen in the vicinity: Sandy Run [Hancock]: Taggart SARU 238 (WNC!; as P. virginiana ssp. praemorsa); Sandy Run [Neck]: Levy s.n. (DUKE!); Wilbur 53695 (DUKE!). [< Dracocephalum purpureum (Walter) E.M. McClint. ex Gleason sensu RAB; = Weakley]
Dico	457	Plantae		Magnoliophyta			Magnoliopsida			Lamiales				Lamiaceae				Pycnanthemum		flexuosum				(Walter) Britton, Sterns, & Poggenb.								Wet pine savannas (WLPS, VWLPS).		Frequent. Jun–Sep; Sep–Oct. Thornhill 603, 679, 704, 948, 1547 (NCSC). Specimens seen in the vicinity: Sandy Run [Neck]: Taggart SARU 191 (WNC!), Wilbur 53641, 53699 (DUKE!). [= RAB, Weakley]
Dico	458	Plantae		Magnoliophyta			Magnoliopsida			Lamiales				Lamiaceae				Pycnanthemum		setosum				Nutt.							SR-T; S2, G4.	Dry pinelands.		Mid Jun–Aug; Aug–Oct. The specimen for this report (Thornhill 1547, NCSC), which was collected by the author at the edge of a dirt road and powerline savanna in Shaken Creek Preserve, has calyx lobes somewhat shorter and leaves somewhat narrower than is typical for P. setosum. However, based on comparisons to specimens at NCSC and NCU and following the advice of better botanists (in particular, D…
Dico	459	Plantae		Magnoliophyta			Magnoliopsida			Lamiales				Lamiaceae				Scutellaria		integrifolia				L.								Wet pine savannas (WLPS, VWLPS).		Frequent. May–Jul; Jul–Aug. Thornhill 316, 363 (NCSC). Specimens seen in the vicinity: Sandy Run [Hancock]: Taggart SARU 117 (WNC!), Wilbur 55319 (DUKE!). [> S. integrifolia L. var. integrifolia, S. integrifolia L. var. hispida Benth. sensu RAB; = Weakley]
Dico	460	Plantae		Magnoliophyta			Magnoliopsida			Laurales				Lauraceae				Persea		palustris				(Raf.) Sarg.								Wet pine flatwoods (WPF-T), wet pine savannas (SPS-T, SPS-RF).		Frequent. May–Jun; Sep–Oct. Thornhill 497, 542 (NCSC). Specimens seen in the vicinity: Sandy Run [Patterson]: Taggart SARU 154 (WNC!). [< P. borbonia (L.) Spreng. sensu RAB; = FNA, Weakley]
Dico	461	Plantae		Magnoliophyta			Magnoliopsida			Laurales				Lauraceae				Sassafras		albidum				J. Presl								Pine/scrub oak sandhills (PSOS-MT), mesic pine savannas (MPS-CP).		Infrequent. Mar–Apr; Jun–Jul. Thornhill 1534 (NCSC). Specimens seen in the vicinity: Sandy Run [RMK]: Taggart SARU 222 (WNC!). [= RAB, FNA, Weakley]
Dico	462	Plantae		Magnoliophyta			Magnoliopsida			Lamiales				Lentibulariaceae				Pinguicula		caerulea				Walter								Wet pine savannas (SPS-T, SPS-RF, WLPS, VWLPS).		Occasional. Apr–May. Thornhill 103, 126, 141 (NCSC). Specimens seen in the vicinity: Sandy Run [Hancock]: Taggart SARU 55 (WNC!); Sandy Run [Neck]: Wilbur 63790, 67099 (DUKE!). [= RAB, Weakley]
Dico	463	Plantae		Magnoliophyta			Magnoliopsida			Lamiales				Lentibulariaceae				Pinguicula		pumila				Michx.							State E; S2, G4.	Wet pine savannas (SPS-RF, WLPS, VWLPS).		Infrequent. Apr–May. Thornhill 108, 125, 143, 163 (NCSC). Specimens seen in the vicinity: Sandy Run: Taggart SARU 574 (WNC!). [= RAB, Weakley]
Dico	464	Plantae		Magnoliophyta			Magnoliopsida			Lamiales				Lentibulariaceae				Utricularia		juncea				Vahl								Wet pine savannas (SPS-T), borrow pits.		Rare. Jul–Sep. Thornhill 32 (NCSC). Specimens seen in the vicinity: Sandy Run [Patterson]: Taggart SARU 645 (WNC!). [= RAB, Weakley]
Dico	465	Plantae		Magnoliophyta			Magnoliopsida			Lamiales				Lentibulariaceae				Utricularia		subulata				L.								Wet pine flatwoods (WPF-T), wet pine savannas (SPS-T, WLPS, VWLPS).		Frequent. Mar–Jul(–later). Thornhill 107, 158, 216 (NCSC). Specimens seen in the vicinity: Sandy Run [Hancock]: Taggart SARU 143 (WNC!); Sandy Run [Neck]: Wilbur 63791 (DUKE!). [= RAB, Weakley]
Dico	466	Plantae		Magnoliophyta			Magnoliopsida			Malpighiales				Linaceae				Linum		floridanum		chrysocarpum		C.M. Rogers							State T; S1S2, G5?T3?.	Pine savannas.		Jun–Oct. Not seen in Shaken Creek Preserve by the present author. Specimens seen in the vicinity: Sandy Run: LeBlond 2536 (NCU!), Taggart SARU 565 (WNC!). [< L. virginianum L. var. floridanum Planch. sensu RAB; = Weakley]\
Dico	467	Plantae		Magnoliophyta			Magnoliopsida			Malpighiales				Linaceae				Linum		floridanum		floridanum		(Planch.) Trel.								Wet pine savannas (WLPS, VWLPS).		Occasional. Jun–Oct. Thornhill 374, 569, 605, 753, 823 (NCSC). Specimens seen in the vicinity: Sandy Run [Haw’s Run]: Taggart SARU 525 (WNC!). [< L. virginianum L. var. floridanum Planch. sensu RAB; = Weakley]
Dico	468	Plantae		Magnoliophyta			Magnoliopsida			Malpighiales				Linaceae				Linum		intercursum				E.P. Bicknell								Wet pine savannas (SPS-RF).		Infrequent. Jun–Oct. Thornhill 486 (NCSC). [< L. virginianum L. var. floridanum Planch. sensu RAB; = Weakley]
Dico	469	Plantae		Magnoliophyta			Magnoliopsida			Malpighiales				Linaceae				Linum		medium		texanum		(Planch.) Fernald								Wet pine savannas (VWLPS).		Infrequent. Jun–Oct. Thornhill 568 (NCSC). Specimens seen in the vicinity: Highway 50: Wilbur 8390 (DUKE!; as L. medium); Sandy Run [Neck]: Taggart SARU 47 (WNC!; as L. medium), Wilbur 55267 (DUKE!; as L. medium). [< L. virginianum L. var. medium Planch. sensu RAB; = Weakley]
Dico	470	Plantae		Magnoliophyta			Magnoliopsida			Malpighiales				Linaceae				Linum		striatum				Walter								Wet pine savannas (WLPS, VWLPS).		Infrequent. Jun–Oct. Thornhill 970 (NCSC). [= RAB, Weakley]
Dico	471	Plantae		Magnoliophyta			Magnoliopsida			Lamiales				Linderniaceae				Lindernia		dubia		anagallidea		(Michx.) Cooperr.								Wet pine flatwoods (WPF-T).		Rare. Jun–Sep. Thornhill 1510 (NCSC). [= L. anagallidea (Michx.) Pennell sensu RAB; = Weakley]
Dico	472	Plantae		Magnoliophyta			Magnoliopsida			Gentianales				Loganiaceae				Mitreola		petiolata				(J.F. Gmel.) Torr. & A. Gray								Wet pine savannas (VWLPS).		Rare. Jul–Sep; Sep–Nov. Thornhill 844 (NCSC). Specimens seen in the vicinity: Sandy Run [Hancock]: Taggart SARU 374 (WNC!); Sandy Run [Neck]: Wilbur 53688 (DUKE!). [= Cynoctonum mitreola (L.) Britton sensu RAB; = Weakley]
Dico	473	Plantae		Magnoliophyta			Magnoliopsida			Gentianales				Loganiaceae				Mitreola		sessilifolia				(J.F. Gmel.) G. Don								Wet pine savannas (VWLPS), ditches.		Infrequent. Late Jun–Aug; Sep–Oct. Thornhill 558, 681 (NCSC). Specimens seen in the vicinity: Sandy Run [Hancock]: Taggart SARU 334 (WNC!); Sandy Run [Neck]: Wilbur 53700 (DUKE!). [= Cynoctonum sessilifolium J.F. Gmel. sensu RAB; = Weakley]
Dico	474	Plantae		Magnoliophyta			Magnoliopsida			Myrtales				Lythraceae				Ammannia		coccinea				Rottb.								Wet pine flatwoods, ditches, other wet places.		Jul–Oct. Not seen in Shaken Creek Preserve by the present author. Specimens seen in the vicinity: Sandy Run [Neck]: LeBlond 2831 (NCU!), Wilbur 57640 (DUKE!). [= RAB, Weakley]
Dico	475	Plantae		Magnoliophyta			Magnoliopsida			Magnoliales				Magnoliaceae				Liriodendron		tulipifera				L.								Pine savannas, wet pine flatwoods.		Apr–Jun; Sep–Oct. Not seen in Shaken Creek Preserve by the present author. Specimens seen in the vicinity: Sandy Run [O’Berry]: Taggart SARU 162 (WNC!; as L. tulipifera var. 1), Weakley 7217 (NCU!; as L. tulipifera var. variabilis). [= RAB, FNA; > L. tulipifera var. 1, L. tulipifera var. tulipifera sensu Weakley]
Dico	476	Plantae		Magnoliophyta			Magnoliopsida			Magnoliales				Magnoliaceae				Magnolia		virginiana				L.								Wet pine flatwoods (WPF-T), wet pine savannas (SPS-T, SPS-RF).		Frequent. Apr–Jul; Jul–Oct. Thornhill 235, 263 (NCSC). Specimens seen in the vicinity: Sandy Run [O’Berry]: Taggart SARU 160 (WNC!; as M. virginiana var. australis), Taggart SARU 553 (WNC!; as M. virginiana var. virginiana). [= RAB, FNA; > M. virginiana L. var. australis Sarg., M. virginiana L. var. virginiana sensu Weakley]
Dico	477	Plantae		Magnoliophyta			Magnoliopsida			Myrtales				Melastomataceae				Rhexia		alifanus				Walter								Wet pine flatwoods (WPF-T), wet pine savannas (SPS-T, SPS-RF, WLPS, VWLPS).		Frequent. May–Sep. Thornhill 524, 557, 580 (NCSC). Specimens seen in the vicinity: Sandy Run [Hancock]: Taggart SARU 263 (WNC!); Sandy Run [Neck]: Wilbur 53691 (DUKE!). [= RAB, Weakley]
Dico	478	Plantae		Magnoliophyta			Magnoliopsida			Myrtales				Melastomataceae				Rhexia		lutea				Walter								Wet pine savannas (SPS-T, SPS-RF, WLPS, VWLPS).		Occasional. Apr–Jul(–later in response to fire). Thornhill 311, 320, 353, 393 (NCSC). Specimens seen in the vicinity: Sandy Run [Hancock]: Taggart SARU 188 (WNC!); Sandy Run [Neck]: Levy s.n. (DUKE!), Wilbur 53679, 55314 (DUKE!). [= RAB, Weakley]
Dico	479	Plantae		Magnoliophyta			Magnoliopsida			Myrtales				Melastomataceae				Rhexia		mariana		exalbida		Michx.								Wet pine savannas (SPS-T, SPS-RF, WLPS, VWLPS).		Occasional. Jun–Sep. Thornhill 501, 520, 567, 593, 668 (NCSC). [= RAB, Weakley]
Dico	480	Plantae		Magnoliophyta			Magnoliopsida			Myrtales				Melastomataceae				Rhexia		mariana		mariana		L.								Wet pine savannas (WLPS).		Rare. May–Oct. Thornhill 617 (NCSC). Specimens seen in the vicinity: Sandy Run [RMK]: Taggart SARU 224 (WNC!). [= RAB, Weakley]
Dico	481	Plantae		Magnoliophyta			Magnoliopsida			Myrtales				Melastomataceae				Rhexia		nashii				Small								Wet pine flatwoods (WPF-T), wet pine savannas (SPS-T, SPS-RF, WLPS).		Frequent. May–Oct. Thornhill 595, 739, 794, 906 (NCSC). Specimens seen in the vicinity: Sandy Run [Hancock]: Taggart SARU 429 (WNC!); Sandy Run [Neck]: Wilbur 53643 (DUKE!). [= R. mariana var. purpurea Michx. sensu RAB; = Weakley]
Dico	482	Plantae		Magnoliophyta			Magnoliopsida			Myrtales				Melastomataceae				Rhexia		petiolata				Walter								Wet pine flatwoods (WPF-T), wet pine savannas (SPS-T, SPS-RF, WLPS, VWLPS).		Frequent. Jun–Sep. Thornhill 665, 675, 792 (NCSC). Specimens seen in the vicinity: Sandy Run [Hancock]: Taggart SARU 414 (WNC!); Sandy Run [Neck]: Wilbur 53675 (DUKE!). [= RAB, Weakley]
Dico	483	Plantae		Magnoliophyta			Magnoliopsida			Fagales				Myricaceae				Morella		caroliniensis				(Mill.) Small								Wet pine flatwoods (WPF-T), wet pine savannas (SPS-T, SPS-RF, WLPS, VWLPS).		Frequent. Apr; Aug–Oct. Thornhill 121, 134, 149, 154, 169 (NCSC). Specimens seen in the vicinity: Highway 50: Wilbur 8388 (DUKE!; as Myrica heterophylla); Sandy Run [Hancock]: Taggart SARU 180 (WNC!); Sandy Run [Neck]: Wilbur 67095 (DUKE!). [= Myrica heterophylla Raf. sensu RAB, FNA; = Weakley]
Dico	484	Plantae		Magnoliophyta			Magnoliopsida			Fagales				Myricaceae				Morella		cerifera				(L.) Small								Wet pine flatwoods (WPF-T), wet pine savannas (SPS-T, SPS-RF, WLPS, VWLPS).		Frequent. Apr; Aug–Oct. Thornhill 131, 132, 148, 170 (NCSC). Specimens seen in the vicinity: Sandy Run [Haw’s Run]: Taggart SARU 16 (WNC!); Sandy Run [Neck]: Wilbur 53682 (DUKE!). [= Myrica cerifera L. var. cerifera sensu RAB; < Myrica cerifera L. sensu FNA; = Weakley]
Dico	485	Plantae		Magnoliophyta			Magnoliopsida			Fagales				Myricaceae				Morella		pumila				(Michx.) Small								Wet pine flatwoods (WPF-T), wet pine savannas (SPS-T, SPS-RF, WLPS).		Frequent. Apr; Aug–Oct. Thornhill 119, 152, 172 (NCSC). Specimens seen in the vicinity: Sandy Run [Neck]: Wilbur 60088 (DUKE!; as Myrica pusilla), Wilbur 63780 (DUKE!; as M. pumila var. cerifera); Sandy Run [Patterson]: Taggart SARU 302 (WNC!). [= Myrica cerifera L. var. pumila Michx. sensu RAB; < Myrica cerifera L. sensu FNA; = Weakley]
Dico	486	Plantae		Magnoliophyta			Magnoliopsida			Cornales				Nyssaceae				Nyssa		biflora				Walter								Wet pine flatwoods (WPF-T), wet pine savannas (SPS-T, SPS-RF, WLPS).		Occasional. Apr–Jun; Aug–Oct. Thornhill 230, 256 (NCSC). Specimens seen in the vicinity: Sandy Run [RMK]: Taggart SARU 235 (WNC!). [= N. sylvatica Marshall var. biflora (Walter) Sarg. sensu RAB; = Weakley]
Dico	487	Plantae		Magnoliophyta			Magnoliopsida			Cornales				Nyssaceae				Nyssa		sylvatica				Marshall								Wet pine flatwoods (WPF-T).		Apr–Jun; Aug–Oct. Reported from Shaken Creek Preserve by LeBlond (2000), but no specimens have been seen on site by the present author. Specimens seen in the vicinity: Sandy Run [RMK]: Taggart SARU 582 (WNC!). [= N. sylvatica Marshall var. sylvatica sensu RAB; = Weakley]
Dico	488	Plantae		Magnoliophyta			Magnoliopsida			Lamiales				Oleaceae				Fraxinus		caroliniana				Mill.								Swampy margins of wet pine savannas (VWLPS), borrow pits, ditches.		Infrequent. May; Jul–Oct. Thornhill 242 (NCSC). Specimens seen in the vicinity: Sandy Run [Patterson]: Taggart SARU 155 (WNC!). [= RAB, Weakley]
Dico	489	Plantae		Magnoliophyta			Magnoliopsida			Myrtales				Onagraceae				Ludwigia		hirtella				Raf.								Wet pine savannas (WLPS, VWLPS).		Infrequent. Jun–Sep. Thornhill 1446 (NCSC). Specimens seen in the vicinity: Sandy Run [Hancock]: Taggart SARU 306 (WNC!). [= RAB, Weakley]
Dico	490	Plantae		Magnoliophyta			Magnoliopsida			Myrtales				Onagraceae				Ludwigia		linearis				Walter								Wet pine savannas (SPS-T, SPS-RF), borrow pits.		Infrequent. Jun–Sep. Two varieties are recognized by Weakley (2012): var. linearis, with the cells of the seed surface oriented parallel to the long axis of the seed, and var. puberula Engelm. & A. Gray, with the cells of the seed surface oriented irregularly or elongated perpendicularly to the long axis of the seed. This character, best seen at ≥ 20× magnification, is the only non-overlapping mo…
Dico	491	Plantae		Magnoliophyta			Magnoliopsida			Myrtales				Onagraceae				Ludwigia		maritima				R.M. Harper							W7; S2S3, G5.	Wet pine savannas (SPS-RF), adjacent roadsides.		Rare. Jun–Sep. Thornhill 1207 (NCSC). Specimens seen in the vicinity: Sandy Run: Taggart SARU 652 (WNC!). [= RAB, Weakley]
Dico	492	Plantae		Magnoliophyta			Magnoliopsida			Myrtales				Onagraceae				Ludwigia		microcarpa				Michx.								Wet pine savannas (VWLPS), adjacent roadsides.		Occasional. Jul–Oct. Thornhill 559, 845, 1440, 1524 (NCSC). Specimens seen in the vicinity: Sandy Run [Neck]: Wilbur 53660, 53690, 57653, 57665 (DUKE!); Sandy Run [RMK]: Taggart SARU 417 (WNC!). [= RAB, Weakley]
Dico	493	Plantae		Magnoliophyta			Magnoliopsida			Myrtales				Onagraceae				Ludwigia		virgata				Michx.								Wet pine savannas (WLPS, VWLPS).		Occasional. Jun–Sep. Thornhill 546, 554, 608, 624, 674 (NCSC). Specimens seen in the vicinity: Sandy Run [Neck]: Wilbur 53677 (DUKE!); Sandy Run [Patterson]: Taggart SARU 304 (WNC!). [= RAB, Weakley]
Dico	494	Plantae		Magnoliophyta			Magnoliopsida			Myrtales				Onagraceae				Oenothera		fruticosa		unguiculata		Fernald							W7; S2S3, G5T2T3.	Wet pine savannas (WLPS, VWLPS).		Occasional. Apr–Aug. LeBlond 4976 (NCU!); Thornhill 364, 376, 424, 480, 565, 1050 (NCSC). Specimens seen in the vicinity: Sandy Run: LeBlond 4575, 4978 (NCU!); Taggart SARU 95 (WNC!). [< O. fruticosa L. sensu RAB; = Weakley]
Dico	495	Plantae		Magnoliophyta			Magnoliopsida			Lamiales				Orobanchaceae				Agalinis		aphylla				(Nutt.) Raf.							W1; S3, G3G4.	Wet pine savannas (WLPS, VWLPS).		Occasional. Sep–Oct; Oct–Nov. Thornhill 44, 1008, 1047 (NCSC). Specimens seen in the vicinity: Holly Shelter: Sorrie 8623 (NCU!); Sandy Run: Leonard 7601 (NCU!), Taggart SARU 458 (WNC!). [= RAB, Weakley]
Dico	496	Plantae		Magnoliophyta			Magnoliopsida			Lamiales				Orobanchaceae				Agalinis		fasciculata				(Elliott) Raf.								Wet pine savannas (SPS-RF).		Rare. Aug–Oct; Oct. Thornhill 1544 (NCSC). Specimens seen in the vicinity: Sandy Run [Hancock]: Taggart SARU 521 (WNC!); Sandy Run [Neck]: LeBlond 2587 (NCU!), Wilbur 57627 (DUKE!). [= RAB, Weakley]
Dico	497	Plantae		Magnoliophyta			Magnoliopsida			Lamiales				Orobanchaceae				Agalinis		linifolia				(Nutt.) Britton							W1; S3, G4?.	Wet pine savannas (WLPS, VWLPS).		Occasional. Aug–Sep; Sep–Oct. Thornhill 965, 977, 1037 (NCSC). Specimens seen in the vicinity: Sandy Run: Taggart SARU 454 (WNC!). [= RAB, Weakley]
Dico	498	Plantae		Magnoliophyta			Magnoliopsida			Lamiales				Orobanchaceae				Agalinis		obtusifolia				Raf.							W1; S2S3, G4G5Q.	Wet pine savannas (WLPS, VWLPS).		Infrequent. Sep–Oct; Oct–Nov. Thornhill 1083, 1264 (NCSC). Specimens seen in the vicinity: Sandy Run: Taggart SARU 471 (WNC!). [= RAB, Weakley]
Dico	499	Plantae		Magnoliophyta			Magnoliopsida			Lamiales				Orobanchaceae				Agalinis		purpurea				(L.) Pennell								Wet pine savannas (SPS-T, SPS-RF, WLPS, VWLPS).		Frequent. Aug–Oct; Sep–Nov. Thornhill 45, 1116, 1134, 1139, 1201 (NCSC). Specimens seen in the vicinity: Sandy Run [Hancock]: Taggart SARU 522 (WNC!); Sandy Run [Neck]: Wilbur 57644, 57662 (DUKE!). [= RAB, Weakley]
Dico	500	Plantae		Magnoliophyta			Magnoliopsida			Lamiales				Orobanchaceae				Agalinis		setacea				(J.F. Gmel.) Raf.								Wet pine flatwoods (WPF-T).		Sep–Oct; Oct–Nov. Reported from Shaken Creek by LeBlond (2000), but no specimens have been seen by the present author. [= RAB, Weakley]
Dico	501	Plantae		Magnoliophyta			Magnoliopsida			Lamiales				Orobanchaceae				Agalinis		virgata				Raf.							SR-P; S2, G3G4Q.	Pine savannas.		Sep–Oct; Oct–Nov. Reported from Sandy Run by LeBlond and Weakley (1991), but no specimens have been seen in Shaken Creek Preserve by the present author. [= RAB, Weakley]
Dico	502	Plantae		Magnoliophyta			Magnoliopsida			Lamiales				Orobanchaceae				Pedicularis		canadensis				L.								Pine savannas.		Apr–May; May–Jul. Not seen in Shaken Creek Preserve by the present author. Specimens seen in the vicinity: Sandy Run [Neck]: Taggart SARU 577 (WNC!). [= RAB, Weakley]
Dico	503	Plantae		Magnoliophyta			Magnoliopsida			Lamiales				Orobanchaceae				Seymeria		cassioides				(J.F. Gmel.) S.F. Blake								Wet pine flatwoods (WPF-T), wet pine savannas (SPS-T, SPS-RF, WLPS, VWLPS).		Frequent. Aug–Oct. Thornhill 28, 33, 1048 (NCSC). Specimens seen in the vicinity: Sandy Run [Neck]: Taggart SARU 502 (WNC!); Wilbur 57650 (DUKE!). [= RAB, Weakley]
Dico	504	Plantae		Magnoliophyta			Magnoliopsida			Celastrales				Parnassiaceae				Parnassia		caroliniana				Michx.							State T, FSC; S2, G3.	Wet pine savannas (WLPS, VWLPS), particularly along margins of adjacent swamps.		Frequent. Sep–Nov(–Dec). Thornhill 48, 1175 (NCSC). Specimens seen in the vicinity: Sandy Run: Taggart SARU 529 (WNC!). [= RAB, Weakley]
Dico	505	Plantae		Magnoliophyta			Magnoliopsida			Lamiales				Phrymaceae				Mimulus		ringens		ringens		L.								Pine savannas.		Jun–Sep. Not seen in Shaken Creek Preserve by the present author. Specimens seen in the vicinity: Sandy Run [Haw’s Run]: Taggart SARU 453 (WNC!). [< M. ringens L.sensu RAB; = Weakley]
Dico	506	Plantae		Magnoliophyta			Magnoliopsida			Lamiales				Plantaginaceae				Nuttallanthus		canadensis				(L.) D.A. Sutton								Roadside margins of wet pine savannas (SPS-T).		Infrequent. Mar–May. Thornhill 224 (NCSC). Specimens seen in the vicinity: Sandy Run [Hancock]: Taggart SARU 42 (WNC!). [< Linaria canadensis (L.) Dum. Cours. sensu RAB; = Weakley]
Dico	507	Plantae		Magnoliophyta			Magnoliopsida			Lamiales				Plantaginaceae				Penstemon		australis				Small								Pine savannas, wet pine flatwoods.		May–Jul; Jul–Aug. Not seen in Shaken Creek Preserve by the present author. Specimens seen in the vicinity: Highway 50: Wilbur 55337 (DUKE!). [< RAB; = Weakley]
Dico	508	Plantae		Magnoliophyta			Magnoliopsida			Lamiales				Plantaginaceae				Penstemon		laevigatus				Aiton								Wet pine savannas (VWLPS).		May–Jun; Jul–Aug. Not seen in Shaken Creek Preserve by the present author. Specimens seen in the vicinity: Sandy Run [Hancock]: Taggart SARU 118 (WNC!; as P. australis); Sandy Run [Neck]: Wilbur 55254, 55292 (DUKE!). [= RAB, Weakley]
Dico	509	Plantae		Magnoliophyta			Magnoliopsida			Lamiales				Plantaginaceae				Plantago		sparsiflora				Michx.							State T, FSC; S1S2, G3.	Pine savannas, adjacent roadsides.		Apr–Oct. Not seen in Shaken Creek Preserve by the present author. Specimens seen in the vicinity: Sandy Run: LeBlond 4564 (NCU!); Leonard 8428 (NCU!); Leonard 8515 (DUKE!, NCSC!); Levy s.n. (DUKE!); Taggart SARU 108 (WNC!); Wilbur 53777, 55315 (DUKE!). [= RAB, Weakley]
Dico	510	Plantae		Magnoliophyta			Magnoliopsida			Lamiales				Plantaginaceae				Sophronanthe		pilosa				(Michx.) Small								Wet pine savannas (SPS-T, VWLPS), adjacent roadsides.		Occasional. Jun–Sep. Thornhill 538, 1304 (NCSC). Specimens seen in the vicinity: Sandy Run [Hancock]: Taggart SARU 648 (WNC!); Sandy Run [Neck]: Wilbur 53645, 53671, 53680, 57636 (DUKE!; as Gratiola pilosa). [= Gratiola pilosa Michx. sensu RAB; = Weakley]
Dico	511	Plantae		Magnoliophyta			Magnoliopsida			Fabales				Polygalaceae				Polygala		brevifolia				Nutt.								Wet pine savannas (SPS-T, SPS-RF, WLPS).		Infrequent. Jun–Oct. Thornhill 712, 908 (NCSC). Specimens seen in the vicinity: Sandy Run [Hancock]: Taggart SARU 400 (WNC!). [= RAB, Weakley]
Dico	512	Plantae		Magnoliophyta			Magnoliopsida			Fabales				Polygalaceae				Polygala		cruciata				L.								Wet pine savannas (SPS-RF, WLPS, VWLPS).		Frequent. Jun–Oct. Thornhill 414, 552, 598, 680, 744 (NCSC). Specimens seen in the vicinity: Highway 50: Wilbur 9427 (DUKE!); Sandy Run [Hancock]: Taggart SARU 266 (WNC!; as P. cruciata var. cruciata); Sandy Run [Neck]: Wilbur 53678 (DUKE!). [= RAB, Weakley]
Dico	513	Plantae		Magnoliophyta			Magnoliopsida			Fabales				Polygalaceae				Polygala		hookeri				Torr. & A. Gray							SC-V; S2S3, G3.	Wet pine savannas (WLPS, VWLPS).		Occasional. Jun–Aug. Thornhill 4, 476, 612 (NCSC). Specimens seen in the vicinity: Sandy Run: Taggart SARU 322 (WNC!). [= RAB, Weakley]
Dico	514	Plantae		Magnoliophyta			Magnoliopsida			Fabales				Polygalaceae				Polygala		incarnata				L.								Wet pine flatwoods (WPF-T), wet pine savannas (WLPS, VWLPS).		Occasional. Jun–Jul. Thornhill 544, 710, 760 (NCSC). Specimens seen in the vicinity: Sandy Run [Haw’s Run]: Taggart SARU 184 (WNC!), Wilbur 53705 (DUKE!). [= RAB, Weakley]
Dico	515	Plantae		Magnoliophyta			Magnoliopsida			Fabales				Polygalaceae				Polygala		lutea				L.								Wet pine flatwoods (WPF-T), wet pine savannas (SPS-T, SPS-RF, WLPS, VWLPS), adjacent roadsides.		Abundant. Apr–Oct. Thornhill 2, 199, 260, 315, 321, 412 (NCSC). Specimens seen in the vicinity: Sandy Run [Hancock]: Taggart SARU 80 (WNC!); Sandy Run [Neck]: Wilbur 53707 (DUKE!), Wyland s.n. (NCSC!). [= RAB, Weakley]
Dico	516	Plantae		Magnoliophyta			Magnoliopsida			Fabales				Polygalaceae				Polygala		ramosa				Elliott								Wet pine savannas (WLPS, VWLPS), adjacent roadsides.		Occasional. Jun–Sep. Thornhill 365, 404, 610, 671 (NCSC). Specimens seen in the vicinity: Sandy Run [Hancock]: Taggart SARU 135 (WNC!); Sandy Run [Neck]: Wilbur 53715 (DUKE!). [= RAB, Weakley]
Dico	517	Plantae		Magnoliophyta			Magnoliopsida			Fabales				Polygalaceae				Polygala		verticillata				L.								Dry woodlands, woodland borders, and openings.		Jun–Sep. Not seen in Shaken Creek Preserve by the present author. Specimens seen in the vicinity: Sandy Run [Hancock]: Bradley 3388 (NCU!). [= P. verticillata var. verticillata sensu RAB; > P. verticillata var. isocycla Fernald, P. verticillata var. verticillata sensu Weakley]
Dico	518	Plantae		Magnoliophyta			Magnoliopsida			Ericales				Primulaceae				Lysimachia		asperulifolia				Poir.							State E, Fed E; S3, G3.	Wet pine flatwoods (WPF-T) and wet pine savannas (SPS-T), usually along margins of adjacent pond pine woodlands or pocosins.		Rare. May–Jun; Aug–Oct. Since only sterile individuals were seen on site by the present author, no vouchers specimens were taken. Specimens seen in the vicinity: Holly Shelter: Sorrie 8452 (NCU!). [= L. asperulaefolia Poir. sensu RAB; = FNA, Weakley]
Dico	519	Plantae		Magnoliophyta			Magnoliopsida			Ericales				Primulaceae				Lysimachia		loomisii				Torr.							W1; S3, G3.	Wet pine savannas (WLPS).		Rare. May–Jun; Aug–Oct. Thornhill 310, 345 (NCSC). Specimens seen in the vicinity: Sandy Run: Cooper 425 (WNC!), Taggart SARU 168 (WNC!). [= RAB, FNA, Weakley]
Dico	520	Plantae		Magnoliophyta			Magnoliopsida			Ranunculales				Ranunculaceae				Clematis		crispa				L.								Wet pine savannas (VWLPS), adjacent swamp margins.		Infrequent. Apr–Aug. Thornhill 561, 838 (NCSC). Specimens seen in the vicinity: Sandy Run [Hancock]: Taggart SARU 66 (WNC!). [= RAB, FNA, Weakley]
Dico	521	Plantae		Magnoliophyta			Magnoliopsida			Ranunculales				Ranunculaceae				Thalictrum		cooleyi				H.E. Ahles							State E, Fed E; S2, G2.	Wet pine savannas (VWLPS).		Infrequent. Late Jun–early Jul; Aug–Oct. LeBlond 474 (stored in personal collection of the collector), Sorrie 9502 (NCU!). Specimens seen in the vicinity: Sandy Run: Ahles 58369 (NCU!), Gardner s.n. (NCU!), Taggart SARU 193 (WNC!). [= RAB, FNA, Weakley]
Dico	522	Plantae		Magnoliophyta			Magnoliopsida			Rosales				Rhamnaceae				Berchemia		scandens				(Hill) K. Koch								Wet pine savannas (VWLPS), adjacent swamp margins.		Infrequent. Apr–May; Aug–Oct. Thornhill 950, 1137 (NCSC). Specimens seen in the vicinity: Sandy Run [Hancock]: Taggart SARU 171 (WNC!); Sandy Run [Neck]: Wilbur 67085 (DUKE!). [= RAB, Weakley]
Dico	523	Plantae		Magnoliophyta			Magnoliopsida			Rosales				Rosaceae				Amelanchier		canadensis				(L.) Medik.								Wet pine flatwoods (WPF-T) and adjacent roadsides.		Rare. Mar–Apr; May–Jun. Thornhill 1258 (NCSC). Specimens seen in the vicinity: Sandy Run [Hancock]: Taggart SARU 111 (WNC!). [= RAB, Weakley]
Dico	524	Plantae		Magnoliophyta			Magnoliopsida			Rosales				Rosaceae				Amelanchier		spicata				(Lam.) K. Koch								Dry, acidic, rocky sites.		Mar–Apr; May–Jun. Not seen in Shaken Creek Preserve by the present author. Specimens seen in the vicinity: Sandy Run [Neck]: Wilbur 60087 (DUKE!). [= RAB, Weakley]
Dico	525	Plantae		Magnoliophyta			Magnoliopsida			Rosales				Rosaceae				Aronia		arbutifolia				(L.) Pers.								Wet pine savannas (SPS-T, SPS-RF, WLPS, VWLPS).		Frequent. Mar–May; Sep–Nov. Thornhill 93, 96, 155 (NCSC). Specimens seen in the vicinity: Sandy Run [O’Berry]: Taggart SARU 17 (WNC!). [= Sorbus arbutifolia (L.) Heynh. var. arbutifolia sensu RAB; = Weakley]
Dico	526	Plantae		Magnoliophyta			Magnoliopsida			Rosales				Rosaceae				Potentilla		simplex				Michx.								Pine savannas.		Apr–Jun; Apr–Jul. Not seen in Shaken Creek Preserve by the present author. Specimens seen in the vicinity: Sandy Run [Hancock]: Taggart SARU 83 (WNC!). [= RAB, Weakley]
Dico	527	Plantae		Magnoliophyta			Magnoliopsida			Rosales				Rosaceae				Prunus		serotina		serotina		Ehrh.								Mesic pine savannas.		Apr–May; Jul–Aug. Not seen in Shaken Creek Preserve by the present author. Specimens seen in the vicinity: Sandy Run [Haw’s Run]: Taggart SARU 558 (WNC!); Sandy Run [Neck]: Wilbur 63776 (DUKE!). [< RAB; = Weakley]
Dico	528	Plantae		Magnoliophyta			Magnoliopsida			Rosales				Rosaceae				Rosa		palustris				Marshall								Wet pine savannas (VWLPS), particularly along margins of adjacent swamps.		Rare. May–Jul; Sep–Oct. Thornhill 1251 (NCSC). Specimens seen in the vicinity: Sandy Run [Haw’s Run]: Taggart SARU 330 (WNC!); Sandy Run [Neck]: Wilbur 55296 (DUKE!). [= RAB, Weakley]
Dico	529	Plantae		Magnoliophyta			Magnoliopsida			Rosales				Rosaceae				Rubus		cuneifolius				Pursh								Wet pine flatwoods, mesic pine savannas.		Late Apr–early Jun; Jun–Jul. Not seen in Shaken Creek Preserve by the present author. Specimens seen in the vicinity: Sandy Run [RMK]: Taggart SARU 227 (WNC!). [= RAB, Weakley]
Dico	530	Plantae		Magnoliophyta			Magnoliopsida			Rosales				Rosaceae				Rubus		pensilvanicus				Poir.								Pine savannas (WLPS, VWLPS), particularly along roadsides or disturbed areas.		Infrequent. Apr–May; late May–Jul. Thornhill 200, 220, 1285, 123, 198, 444 (NCSC). Specimens seen in the vicinity: Sandy Run [RMK]: Taggart SARU 335 (WNC!; as R. argutus). [> R. argutus Link, R. betulifolius Small sensu RAB; = Weakley]
Dico	531	Plantae		Magnoliophyta			Magnoliopsida			Gentianales				Rubiaceae				Diodia		teres				Walter								Scrapes in wet pine flatwoods (WPF-T), roadsides, and other dryish, disturbed areas.		Infrequent. Jun–Dec. Thornhill 900 (NCSC). Specimens seen in the vicinity: Sandy Run [Hancock]: Taggart SARU 351 (WNC!). [= RAB, Weakley]
Dico	532	Plantae		Magnoliophyta			Magnoliopsida			Gentianales				Rubiaceae				Diodia		virginiana				L.								Wet pine savannas (WLPS, VWLPS), particularly along or near adjacent roadsides.		Frequent. Jun–Dec. Thornhill 280, 596, 984 (NCSC). Specimens seen in the vicinity: Sandy Run [Hancock]: Taggart SARU 136 (WNC!), Wilbur 53698 (DUKE!). [= RAB, Weakley]
Dico	533	Plantae		Magnoliophyta			Magnoliopsida			Gentianales				Rubiaceae				Mitchella		repens				L.								Margins of wet pine savannas (VWLPS) and adjacent swamps.		Infrequent. May–Jun; Jun–Jul. Thornhill 835, 1262 (NCSC). Specimens seen in the vicinity: Sandy Run [RMK]: Taggart SARU 133 (WNC!). [= RAB, Weakley]
Dico	534	Plantae		Magnoliophyta			Magnoliopsida			Gentianales				Rubiaceae				Oldenlandia		uniflora				L.								Wet pine savannas (SPS-RF), adjacent roadsides, margins of borrow pits.		Infrequent. Aug–Oct. Thornhill 903, 1115 (NCSC). [= RAB, Weakley]
Dico	535	Plantae		Magnoliophyta			Magnoliopsida			Malpighiales				Salicaceae				Salix		caroliniana				Michx.								Borrow pits within and roadside thickets adjacent to wet pine savannas (VWLPS).		Rare. Mar–Apr. Thornhill 243 (NCSC). Specimens seen in the vicinity: Sandy Run [Hancock]: Taggart SARU 254 (WNC!); Sandy Run [Neck]: Wilbur 63778, 63786, 63789, 67090 (DUKE!). [= RAB, FNA, Weakley]
Dico	536	Plantae		Magnoliophyta			Magnoliopsida			Santalales				Santalacaceae				Phoradendron		leucarpum		leucarpum		(Raf.) Reveal & M.C. Johnst.								Parasitic on various trees (frequently on Acer rubrum) along margins of wet pine savannas (WLPS) and swamps.		Infrequent. Oct–Nov(–Mar); Nov–Jan(–May). Thornhill 90 (NCSC). Specimens seen in the vicinity: Sandy Run [Patterson]: Taggart SARU 562 (WNC!; as P. serotinum (Raf.) M.C. Johnst. ssp. serotinum). [< P. serotinum (Raf.) M.C. Johnst. sensu RAB; = Weakley]
Dico	537	Plantae		Magnoliophyta			Magnoliopsida			Sapindales				Sapindaceae				Acer		rubrum				L.								Mesic pine savannas (MPS-CP), wet pine flatwoods (WPF-T), wet pine savannas (SPS-T, SPS-RF, WLPS, VWLPS), roadsides.		Abundant. Jan–Mar; Apr–Jul. If one chooses to recognize varieties within A. rubrum, the specimens collected by the present author are referable to var. trilobum Torr. & A. Gray ex K. Koch. Thornhill 80, 265, 281 (NCSC). Specimens seen in the vicinity: Sandy Run [Hancock]: Taggart SARU 8 (WNC!; as A. rubrum var. trilobum); Sandy Run [Neck]: Wilbur 67089 (DUKE!). [= RAB; > A. rubrum L. various vari…
Dico	538	Plantae		Magnoliophyta			Magnoliopsida			Ericales				Sarraceniaceae				Sarracenia		flava				L.							W5B; S3S4, G5?.	Wet pine savannas (SPS-T, SPS-RF, WLPS, VWLPS).		Frequent Mar–Apr; May–Jun. Thornhill 115, 137, 342, 343, 359, 391 (NCSC). Specimens seen in the vicinity: Sandy Run: Taggart SARU 56 (WNC!), Wyland s.n. (NCSC!). [= RAB, FNA, Weakley]
Dico	539	Plantae		Magnoliophyta			Magnoliopsida			Ericales				Sarraceniaceae				Sarracenia		purpurea	venosa			(Raf.) Fernald								Wet pine savannas (SPS-T, SPS-RF, WLPS, VWLPS).		Frequent. Apr–May; Jun–Jul. Thornhill 114, 130, 174 (NCSC). Specimens seen in the vicinity: Sandy Run [Hancock]: Taggart SARU 81 (WNC!), Wyland s.n. (NCSC!). [< S. purpurea L. sensu RAB; = FNA, Weakley]
Dico	540	Plantae		Magnoliophyta			Magnoliopsida			Ericales				Sarraceniaceae				Sarracenia		rubra	rubra			Walter							W5B; S3, G4T3T4.	Wet pine flatwoods (WPF-T).		Apr–May; Jun–Jul. Reported from Shaken Creek Preserve by LeBlond (2000), but no specimens have been seen on site by the present author. Specimens seen in the vicinity: Sandy Run: Taggart SARU 568 (WNC!). [< S. rubra Walter sensu RAB; = FNA, Weakley]
Dico	541	Plantae		Magnoliophyta			Magnoliopsida			Ericales				Symplocaceae				Symplocos		tinctoria				(L.) L’Hér.								Wet pine flatwoods (WPF-T), wet pine savannas (WLPS, VWLPS).		Occasional. Mar–May; Aug–Sep. Thornhill 144, 765 (NCSC). Specimens seen in the vicinity: Sandy Run [Neck]: Wilbur 55258 (DUKE!); Sandy Run [Patterson]: Taggart SARU 52 (WNC!). [= RAB, FNA, Weakley]
Dico	542	Plantae		Magnoliophyta			Magnoliopsida			Lamiales				Tetrachondraceae				Polypremum		procumbens				L.								Wet pine savannas (SPS-RF, VWLPS), adjacent roadsides.		Frequent. Late May–Sep; Aug–Oct. Thornhill 482, 547, 594, 949 (NCSC). Specimens seen in the vicinity: Sandy Run [Hancock]: Taggart SARU 373 (WNC!); Sandy Run [Neck]: Wilbur 53634, 57633 (DUKE!). [= RAB, Weakley]
Dico	543	Plantae		Magnoliophyta			Magnoliopsida			Ericales				Theaceae				Gordonia		lasianthus				(L.) J. Ellis								Wet pine flatwoods (WPF-T), wet pine savannas (SPS-T, SPS-RF).		Occasional. Jul–Sep; Sep–Oct. Thornhill 306 (NCSC). Specimens seen in the vicinity: Sandy Run [Hancock]: Taggart SARU 214 (WNC!). [= RAB, FNA, Weakley]
Dico	544	Plantae		Magnoliophyta			Magnoliopsida			Malpighiales				Violaceae				Viola		brittoniana				Pollard							W7; S2?, G4G5.	Margin of pine savanna (VWLPS) and adjacent swamp.		Rare. Apr–May. Thornhill 1261 (NCSC). [> V. brittoniana var. brittoniana, V. brittoniana var. pectinata (E.P. Bicknell) Alexander sensu RAB; = Weakley]
Dico	545	Plantae		Magnoliophyta			Magnoliopsida			Malpighiales				Violaceae				Viola		lanceolata		lanceolata		L.								Wet pine savannas (WLPS, VWLPS).		Occasional. Mar–May. Thornhill 109, 1254 (NCSC). Specimens seen in the vicinity: Sandy Run [Haw’s Run]: Taggart SARU 109 (WNC!). [< V. lanceolata L. sensu RAB; = Weakley]
Dico	546	Plantae		Magnoliophyta			Magnoliopsida			Malpighiales				Violaceae				Viola		lanceolata		vittata		(Greene) Weath. & Griscom								Wet pine savannas (WLPS, VWLPS).		Infrequent. Feb–May. Thornhill 85 (NCSC). [< V. lanceolata L. sensu RAB; = Weakley]
Dico	547	Plantae		Magnoliophyta			Magnoliopsida			Malpighiales				Violaceae				Viola		primulifolia				L.								Wet pine savannas (SPS-T, SPS-RF, WLPS, VWLPS).		Frequent. Mar–May. Thornhill 75, 91, 175 (NCSC). Specimens seen in the vicinity: Sandy Run [Hancock]: Taggart SARU 5 (WNC!). [= RAB, Weakley]
Dico	548	Plantae		Magnoliophyta			Magnoliopsida			Malpighiales				Violaceae				Viola		sagittata		sagittata		Aiton								Wet pine flatwoods (WPF-T), wet pine savannas (VWLPS).		Infrequent. Apr. Thornhill 86, 88, 106, 110 (NCSC). Specimens seen in the vicinity: Sandy Run [Haw’s Run]: Taggart SARU 54 (WNC!; as V. sagittata). [> V. sagittata, V. emarginata (Nutt.) Leconte sensu RAB; = Weakley]
Dico	549	Plantae		Magnoliophyta			Magnoliopsida			Malpighiales				Violaceae				Viola		septemloba				Leconte								Wet pine savannas (WLPS, VWLPS).		Infrequent. Late Mar–early May. Thornhill 95, 139 (NCSC). [< RAB; = Weakley]
Dico	550	Plantae		Magnoliophyta			Magnoliopsida			Malpighiales				Violaceae				Viola		sororia		missouriensis		(Greene) L.E. McKinney								Wet pine flatwoods (WPF-T), wet pine savannas (WLPS, VWLPS).		Occasional. Mar–May. Thornhill 122, 1257, 1260 (NCSC). Specimens seen in the vicinity: Sandy Run [Neck]: LeBlond 1938 (NCU!; as V. affinis); Sandy Run [Patterson]: Taggart SARU 573 (WNC!; as V. affinis). [= V. affinis Leconte sensu RAB; = Weakley]
Dico	551	Plantae		Magnoliophyta			Magnoliopsida			Vitales				Vitaceae				Parthenocissus		quinquefolia				(L.) Planch.								Wet pine flatwoods (WPF-T), margins of wet pine savannas (VWLPS) and adjacent swamps.		Infrequent. May–Jul; Jul–Aug. Thornhill 974 (NCSC). Specimens seen in the vicinity: Sandy Run [Hancock]: Taggart SARU 200 (WNC!). [= RAB, Weakley]
Dico	552	Plantae		Magnoliophyta			Magnoliopsida			Vitales				Vitaceae				Vitis		rotundifolia		rotundifolia		Michx.								Wet pine savannas (WLPS, VWLPS), particularly along swamp margins or near roadsides.		Infrequent. May–Jun; Aug–Oct. Thornhill 331, 1092, 1240 (NCSC). Specimens seen in the vicinity: Sandy Run [Hancock]: Taggart SARU 203 (WNC!). [< V. rotundifolia sensu RAB; = Muscadinia rotundifolia (Michx.) Small var. rotundifolia sensu Weakley]

## Sheet: Vocabularies
ISO 693-2	Language	CountryID	Country	Roles	YesNo	CC	Code	ThreatStatus	NativeStatus
abk	Abkhazian	AF	AFGHANISTAN	Originator	Yes	cc0	ICBN	Least Concern	Native
ace	Achinese	AX	ALAND ISLANDS	Content Provider	No	publicdomain	ICZN	Near Threatened	Introduced
ach	Acoli	AL	ALBANIA	Principal Investigator		by	ICNB	Vulnerable	Naturalised
ada	Adangme	DZ	ALGERIA	Editor		by-nc-sa	ICTV	Endangered	Invasive
ady	Adyghe	AS	AMERICAN SAMOA	Publisher		by-sa	BC	Critically Endangered	Managed
aar	Afar	AD	ANDORRA	Processor			ICNPC	Extinct in the Wild	Uncertain
afh	Afrihili	AO	ANGOLA	Custodian/Steward			BioCode	Extinct
afr	Afrikaans	AI	ANGUILLA	Author				Data Deficient
afa	Afro-Asiatic languages	AQ	ANTARCTICA	Metadata Provider				Not Evaluated
ain	Ainu	AG	ANTIGUA AND BARBUDA	Distributor
aka	Akan	AR	ARGENTINA	User
akk	Akkadian	AM	ARMENIA
alb	Albanian	AW	ARUBA
ale	Aleut	AU	AUSTRALIA
alg	Algonquian languages	AT	AUSTRIA
tut	Altaic languages	AZ	AZERBAIJAN
amh	Amharic	BS	BAHAMAS
anp	Angika	BH	BAHRAIN
apa	Apache languages	BD	BANGLADESH
ara	Arabic	BB	BARBADOS
arg	Aragonese	BY	BELARUS
arp	Arapaho	BE	BELGIUM
arw	Arawak	BZ	BELIZE
arm	Armenian	BJ	BENIN
rup	Aromanian	BM	BERMUDA
art	Artificial languages	BT	BHUTAN
asm	Assamese	BO	BOLIVIA
ast	Asturian	BA	BOSNIA AND HERZEGOVINA
ath	Athapascan languages	BW	BOTSWANA
aus	Australian languages	BV	BOUVET ISLAND
map	Austronesian languages	BR	BRAZIL
ava	Avaric	IO	BRITISH INDIAN OCEAN TERRITORY
ave	Avestan	BN	BRUNEI DARUSSALAM
awa	Awadhi	BG	BULGARIA
aym	Aymara	BF	BURKINA FASO
aze	Azerbaijani	BI	BURUNDI
ban	Balinese	KH	CAMBODIA
bat	Baltic languages	CM	CAMEROON
bal	Baluchi	CA	CANADA
bam	Bambara	CV	CAPE VERDE
bai	Bamileke languages	KY	CAYMAN ISLANDS
bad	Banda languages	CF	CENTRAL AFRICAN REPUBLIC
bnt	Bantu (Other)	TD	CHAD
bas	Basa	CL	CHILE
bak	Bashkir	CN	CHINA
baq	Basque	TW	CHINESE TAIPEI
btk	Batak languages	CX	CHRISTMAS ISLAND
bej	Beja	CC	COCOS (KEELING) ISLANDS
bel	Belarusian	CO	COLOMBIA
bem	Bemba	KM	COMOROS
ben	Bengali	CG	CONGO
ber	Berber languages	CD	CONGO, THE DEMOCRATIC REPUBLIC OF THE
bho	Bhojpuri	CK	COOK ISLANDS
bih	Bihari languages	CR	COSTA RICA
bik	Bikol	CI	COTE D'IVOIRE
bin	Bini	HR	CROATIA
bis	Bislama	CU	CUBA
byn	Blin	CY	CYPRUS
zbl	Blissymbols	CZ	CZECH REPUBLIC
nob	Bokmål, Norwegian	DK	DENMARK
bos	Bosnian	DJ	DJIBOUTI
bra	Braj	DM	DOMINICA
bre	Breton	DO	DOMINICAN REPUBLIC
bug	Buginese	EC	ECUADOR
bul	Bulgarian	EG	EGYPT
bua	Buriat	SV	EL SALVADOR
bur	Burmese	GQ	EQUATORIAL GUINEA
cad	Caddo	ER	ERITREA
cat	Catalan	EE	ESTONIA
cau	Caucasian languages	ET	ETHIOPIA
ceb	Cebuano	FK	FALKLAND ISLANDS (MALVINAS)
cel	Celtic languages	FO	FAROE ISLANDS
cai	Central American Indian languages	FJ	FIJI
khm	Central Khmer	FI	FINLAND
chg	Chagatai	FR	FRANCE
cmc	Chamic languages	GF	FRENCH GUIANA
cha	Chamorro	PF	FRENCH POLYNESIA
che	Chechen	TF	FRENCH SOUTHERN TERRITORIES
chr	Cherokee	GA	GABON
chy	Cheyenne	GM	GAMBIA
chb	Chibcha	GE	GEORGIA
nya	Chichewa	DE	GERMANY
chi	Chinese	GH	GHANA
chn	Chinook jargon	GI	GIBRALTAR
chp	Chipewyan	GR	GREECE
cho	Choctaw	GL	GREENLAND
chu	Church Slavic	GD	GRENADA
chk	Chuukese	GP	GUADELOUPE
chv	Chuvash	GU	GUAM
nwc	Classical Newari	GT	GUATEMALA
syc	Classical Syriac	GG	GUERNSEY
cop	Coptic	GN	GUINEA
cor	Cornish	GW	GUINEA-BISSAU
cos	Corsican	GY	GUYANA
cre	Cree	HT	HAITI
mus	Creek	HM	HEARD ISLAND AND MCDONALD ISLANDS
crp	Creoles and pidgins	HN	HONDURAS
cpe	Creoles and pidgins, English based	HK	HONG KONG
cpf	Creoles and pidgins, French-based	HU	HUNGARY
cpp	Creoles and pidgins, Portuguese-based	IS	ICELAND
crh	Crimean Tatar	IN	INDIA
hrv	Croatian	ID	INDONESIA
cus	Cushitic languages	IR	IRAN (ISLAMIC REPUBLIC OF)
cze	Czech	IQ	IRAQ
dak	Dakota	IE	IRELAND
dan	Danish	IM	ISLE OF MAN
dar	Dargwa	IL	ISRAEL
del	Delaware	IT	ITALY
din	Dinka	JM	JAMAICA
div	Divehi	JP	JAPAN
doi	Dogri	JE	JERSEY
dgr	Dogrib	JO	JORDAN
dra	Dravidian languages	KZ	KAZAKHSTAN
dua	Duala	KE	KENYA
dut	Dutch	KI	KIRIBATI
dum	Dutch, Middle (ca.1050-1350)	KP	KOREA, DEMOCRATIC PEOPLE'S REPUBLIC OF
dyu	Dyula	KR	KOREA, REPUBLIC OF
dzo	Dzongkha	KW	KUWAIT
frs	Eastern Frisian	KG	KYRGYZSTAN
efi	Efik	LA	LAO PEOPLE'S DEMOCRATIC REPUBLIC
egy	Egyptian (Ancient)	LV	LATVIA
eka	Ekajuk	LB	LEBANON
elx	Elamite	LS	LESOTHO
eng	English	LR	LIBERIA
enm	English, Middle (1100-1500)	LY	LIBYAN ARAB JAMAHIRIYA
ang	English, Old (ca.450-1100)	LI	LIECHTENSTEIN
myv	Erzya	LT	LITHUANIA
epo	Esperanto	LU	LUXEMBOURG
est	Estonian	MO	MACAO
ewe	Ewe	MK	MACEDONIA, THE FORMER YUGOSLAV REPUBLIC OF
ewo	Ewondo	MG	MADAGASCAR
fan	Fang	MW	MALAWI
fat	Fanti	MY	MALAYSIA
fao	Faroese	MV	MALDIVES
fij	Fijian	ML	MALI
fil	Filipino	MT	MALTA
fin	Finnish	MH	MARSHALL ISLANDS
fiu	Finno-Ugrian languages	MQ	MARTINIQUE
fon	Fon	MR	MAURITANIA
fre	French	MU	MAURITIUS
frm	French, Middle (ca.1400-1600)	YT	MAYOTTE
fro	French, Old (842-ca.1400)	MX	MEXICO
fur	Friulian	FM	MICRONESIA, FEDERATED STATES OF
ful	Fulah	MD	MOLDOVA, REPUBLIC OF
gaa	Ga	MC	MONACO
gla	Gaelic	MN	MONGOLIA
car	Galibi Carib	ME	MONTENEGRO
glg	Galician	MS	MONTSERRAT
lug	Ganda	MA	MOROCCO
gay	Gayo	MZ	MOZAMBIQUE
gba	Gbaya	MM	MYANMAR
gez	Geez	NA	NAMIBIA
geo	Georgian	NR	NAURU
ger	German	NP	NEPAL
gmh	German, Middle High (ca.1050-1500)	NL	NETHERLANDS
goh	German, Old High (ca.750-1050)	AN	NETHERLANDS ANTILLES
gem	Germanic languages	NC	NEW CALEDONIA
gil	Gilbertese	NZ	NEW ZEALAND
gon	Gondi	NI	NICARAGUA
gor	Gorontalo	NE	NIGER
got	Gothic	NG	NIGERIA
grb	Grebo	NU	NIUE
grc	Greek, Ancient (to 1453)	NF	NORFOLK ISLAND
gre	Greek, Modern (1453-)	MP	NORTHERN MARIANA ISLANDS
grn	Guarani	NO	NORWAY
guj	Gujarati	OM	OMAN
gwi	Gwich'in	PK	PAKISTAN
hai	Haida	PW	PALAU
hat	Haitian	PS	PALESTINIAN TERRITORY, OCCUPIED
hau	Hausa	PA	PANAMA
haw	Hawaiian	PG	PAPUA NEW GUINEA
heb	Hebrew	PY	PARAGUAY
her	Herero	PE	PERU
hil	Hiligaynon	PH	PHILIPPINES
him	Himachali languages	PN	PITCAIRN
hin	Hindi	PL	POLAND
hmo	Hiri Motu	PT	PORTUGAL
hit	Hittite	PR	PUERTO RICO
hmn	Hmong	QA	QATAR
hun	Hungarian	RE	REUNION
hup	Hupa	RO	ROMANIA
iba	Iban	RU	RUSSIAN FEDERATION
ice	Icelandic	RW	RWANDA
ido	Ido	BL	SAINT BARTHELEMY
ibo	Igbo	SH	SAINT HELENA
ijo	Ijo languages	KN	SAINT KITTS AND NEVIS
ilo	Iloko	LC	SAINT LUCIA
smn	Inari Sami	PM	SAINT PIERRE AND MIQUELON
inc	Indic languages	VC	SAINT VINCENT AND THE GRENADINES
ine	Indo-European languages	WS	SAMOA
ind	Indonesian	SM	SAN MARINO
inh	Ingush	ST	SAO TOME AND PRINCIPE
ina	Interlingua (International Auxiliary Language Association)	SA	SAUDI ARABIA
ile	Interlingue	SN	SENEGAL
iku	Inuktitut	RS	SERBIA
ipk	Inupiaq	SC	SEYCHELLES
ira	Iranian languages	SL	SIERRA LEONE
gle	Irish	SG	SINGAPORE
mga	Irish, Middle (900-1200)	SK	SLOVAKIA
sga	Irish, Old (to 900)	SI	SLOVENIA
iro	Iroquoian languages	SB	SOLOMON ISLANDS
ita	Italian	SO	SOMALIA
jpn	Japanese	ZA	SOUTH AFRICA
jav	Javanese	GS	SOUTH GEORGIA AND THE SOUTH SANDWICH ISLANDS
jrb	Judeo-Arabic	ES	SPAIN
jpr	Judeo-Persian	LK	SRI LANKA
kbd	Kabardian	SD	SUDAN
kab	Kabyle	SR	SURINAME
kac	Kachin	SJ	SVALBARD AND JAN MAYEN
kal	Kalaallisut	SZ	SWAZILAND
xal	Kalmyk	SE	SWEDEN
kam	Kamba	CH	SWITZERLAND
kan	Kannada	SY	SYRIAN ARAB REPUBLIC
kau	Kanuri	TJ	TAJIKISTAN
kaa	Kara-Kalpak	TZ	TANZANIA, UNITED REPUBLIC OF
krc	Karachay-Balkar	TH	THAILAND
krl	Karelian	TL	TIMOR-LESTE
kar	Karen languages	TG	TOGO
kas	Kashmiri	TK	TOKELAU
csb	Kashubian	TO	TONGA
kaw	Kawi	TT	TRINIDAD AND TOBAGO
kaz	Kazakh	TN	TUNISIA
kha	Khasi	TR	TURKEY
khi	Khoisan languages	TM	TURKMENISTAN
kho	Khotanese	TC	TURKS AND CAICOS ISLANDS
kik	Kikuyu	TV	TUVALU
kmb	Kimbundu	UG	UGANDA
kin	Kinyarwanda	UA	UKRAINE
kir	Kirghiz	AE	UNITED ARAB EMIRATES
tlh	Klingon	GB	UNITED KINGDOM
kom	Komi	US	UNITED STATES
kon	Kongo	UM	UNITED STATES MINOR OUTLYING ISLANDS
kok	Konkani	UY	URUGUAY
kor	Korean	UZ	UZBEKISTAN
kos	Kosraean	VU	VANUATU
kpe	Kpelle	VA	VATICAN CITY STATE (HOLY SEE)
kro	Kru languages	VE	VENEZUELA
kua	Kuanyama	VN	VIET NAM
kum	Kumyk	VG	VIRGIN ISLANDS (BRITISH)
kur	Kurdish	VI	VIRGIN ISLANDS (U.S.)
kru	Kurukh	WF	WALLIS AND FUTUNA
kut	Kutenai	EH	WESTERN SAHARA
lad	Ladino	YE	YEMEN
lah	Lahnda	YU	YUGOSLAVIA
lam	Lamba	ZM	ZAMBIA
day	Land Dayak languages	ZW	ZIMBABWE
lao	Lao
lat	Latin
lav	Latvian
lez	Lezghian
lim	Limburgan
lin	Lingala
lit	Lithuanian
jbo	Lojban
nds	Low German
dsb	Lower Sorbian
loz	Lozi
lub	Luba-Katanga
lua	Luba-Lulua
lui	Luiseno
smj	Lule Sami
lun	Lunda
luo	Luo (Kenya and Tanzania)
lus	Lushai
ltz	Luxembourgish
mac	Macedonian
mad	Madurese
mag	Magahi
mai	Maithili
mak	Makasar
mlg	Malagasy
may	Malay
mal	Malayalam
mlt	Maltese
mnc	Manchu
mdr	Mandar
man	Mandingo
mni	Manipuri
mno	Manobo languages
glv	Manx
mao	Maori
arn	Mapudungun
mar	Marathi
chm	Mari
mah	Marshallese
mwr	Marwari
mas	Masai
myn	Mayan languages
men	Mende
mic	Mi'kmaq
min	Minangkabau
mwl	Mirandese
moh	Mohawk
mdf	Moksha
mkh	Mon-Khmer languages
lol	Mongo
mon	Mongolian
mos	Mossi
mul	Multiple languages
mun	Munda languages
nqo	N'Ko
nah	Nahuatl languages
nau	Nauru
nav	Navajo
nde	Ndebele, North
nbl	Ndebele, South
ndo	Ndonga
nap	Neapolitan
new	Nepal Bhasa
nep	Nepali
nia	Nias
nic	Niger-Kordofanian languages
ssa	Nilo-Saharan languages
niu	Niuean
zxx	No linguistic content
nog	Nogai
non	Norse, Old
nai	North American Indian languages
frr	Northern Frisian
sme	Northern Sami
nor	Norwegian
nno	Norwegian Nynorsk
nub	Nubian languages
nym	Nyamwezi
nyn	Nyankole
nyo	Nyoro
nzi	Nzima
oci	Occitan (post 1500)
arc	Official Aramaic (700-300 BCE)
oji	Ojibwa
ori	Oriya
orm	Oromo
osa	Osage
oss	Ossetian
oto	Otomian languages
pal	Pahlavi
pau	Palauan
pli	Pali
pam	Pampanga
pag	Pangasinan
pan	Panjabi
pap	Papiamento
paa	Papuan languages
nso	Pedi
per	Persian
peo	Persian, Old (ca.600-400 B.C.)
phi	Philippine languages
phn	Phoenician
pon	Pohnpeian
pol	Polish
por	Portuguese
pra	Prakrit languages
pro	ProvenÃ§al, Old (to 1500)
pus	Pushto
que	Quechua
raj	Rajasthani
rap	Rapanui
rar	Rarotongan
qaa-qtz	Reserved for local use
roa	Romance languages
rum	Romanian
roh	Romansh
rom	Romany
run	Rundi
rus	Russian
sal	Salishan languages
sam	Samaritan Aramaic
smi	Sami languages
smo	Samoan
sad	Sandawe
sag	Sango
san	Sanskrit
sat	Santali
srd	Sardinian
sas	Sasak
sco	Scots
sel	Selkup
sem	Semitic languages
srp	Serbian
srr	Serer
shn	Shan
sna	Shona
iii	Sichuan Yi
scn	Sicilian
sid	Sidamo
sgn	Sign Languages
bla	Siksika
snd	Sindhi
sin	Sinhala
sit	Sino-Tibetan languages
sio	Siouan languages
sms	Skolt Sami
den	Slave (Athapascan)
sla	Slavic languages
slo	Slovak
slv	Slovenian
sog	Sogdian
som	Somali
son	Songhai languages
snk	Soninke
wen	Sorbian languages
sot	Sotho, Southern
sai	South American Indian (Other)
alt	Southern Altai
sma	Southern Sami
spa	Spanish
srn	Sranan Tongo
suk	Sukuma
sux	Sumerian
sun	Sundanese
sus	Susu
swa	Swahili
ssw	Swati
swe	Swedish
gsw	Swiss German
syr	Syriac
tgl	Tagalog
tah	Tahitian
tai	Tai languages
tgk	Tajik
tmh	Tamashek
tam	Tamil
tat	Tatar
tel	Telugu
ter	Tereno
tet	Tetum
tha	Thai
tib	Tibetan
tig	Tigre
tir	Tigrinya
tem	Timne
tiv	Tiv
tli	Tlingit
tpi	Tok Pisin
tkl	Tokelau
tog	Tonga (Nyasa)
ton	Tonga (Tonga Islands)
tsi	Tsimshian
tso	Tsonga
tsn	Tswana
tum	Tumbuka
tup	Tupi languages
tur	Turkish
ota	Turkish, Ottoman (1500-1928)
tuk	Turkmen
tvl	Tuvalu
tyv	Tuvinian
twi	Twi
udm	Udmurt
uga	Ugaritic
uig	Uighur
ukr	Ukrainian
umb	Umbundu
mis	Uncoded languages
und	Undetermined
hsb	Upper Sorbian
urd	Urdu
uzb	Uzbek
vai	Vai
ven	Venda
vie	Vietnamese
vol	Volapük
vot	Votic
wak	Wakashan languages
wal	Walamo
wln	Walloon
war	Waray
was	Washo
wel	Welsh
fry	Western Frisian
wol	Wolof
xho	Xhosa
sah	Yakut
yao	Yao
yap	Yapese
yid	Yiddish
yor	Yoruba
ypk	Yupik languages
znd	Zande languages
zap	Zapotec
zza	Zaza
zen	Zenaga
zha	Zhuang
zul	Zulu
zun	Zuni

## Sheet: Materials
Taxon_Local_ID	typeStatus	catalogNumber	occurrenceDetails	occurrenceRemarks	recordNumber	recordedBy	individualID	individualCount	sex	lifeStage	reproductiveCondition	behavior	establishmentMeans	occurrenceStatus	preparations	disposition	otherCatalogNumbers	previousIdentifications	associatedMedia	associatedReferences	associatedOccurrences	associatedSequences	taxonID	scientificNameID	acceptedNameUsageID	parentNameUsageID	originalNameUsageID	nameAccordingToID	namePublishedInID	taxonConceptID	scientificName	acceptedNameUsage	parentNameUsage	originalNameUsage	nameAccordingTo	namePublishedIn	higherClassification	kingdom	phylum	class	order	family	genus	subgenus	specificEpithet	infraspecificEpithet	taxonRank	verbatimTaxonRank	scientificNameAuthorship
[truncated: 106 more columns]

## Sheet: ExternalLinks
Taxon_Local_ID	Link type	Link
